# Supplementary material for: Boryl (Hetero)aryne Precursors as Versatile Arylation Reagents: Synthesis through C–H Activation and Orthogonal Reactivity
Source: PubMed Central journal article supplement — Angew Chem Int Ed Engl. 2015 Aug 13;54(40):11765–9. doi: 10.1002/anie.201503152 (PMC4600243; doi:10.1002/anie.201503152), 2015-08-13

Supporting Information

**Boryl (Hetero)aryne Precursors as Versatile Arylation Reagents:  
Synthesis through C–H Activation and Orthogonal Reactivity**

*Emilien Demory, Karthik Devaraj, Andreas Orthaber, Paul J. Gates, and Lukasz T. Pilarski\**

anie\_201503152\_sm\_miscellaneous\_information.pdf

## Supporting Information

|          |                                                         |            |
|----------|---------------------------------------------------------|------------|
| <b>1</b> | <b>GENERAL CONSIDERATIONS</b> .....                     | <b>S2</b>  |
| <b>2</b> | <b>ORIGIN AND SYNTHESIS OF STARTING MATERIALS</b> ..... | <b>S2</b>  |
| <b>3</b> | <b>BORYLATION OF ARYNE PRECURSORS</b> .....             | <b>S3</b>  |
| 3.1      | GENERAL PROCEDURE FOR BORYLATION.....                   | S3         |
| 3.2      | DATA FOR BORYLATED COMPOUNDS .....                      | S3         |
|          | <b>PROCEDURES FOR THE CAPTURE OF BORYL ARYNES</b> ..... | <b>S5</b>  |
| 3.3      | GENERAL PROCEDURE .....                                 | S5         |
| 3.4      | DATA FOR ARYNE CAPTURE COMPOUNDS .....                  | S5         |
| <b>4</b> | <b>SUZUKI-MIYaura REACTIONS</b> .....                   | <b>S10</b> |
| <b>5</b> | <b>DEPROTECTION OF B(PIN) BORONATES</b> .....           | <b>S12</b> |
| 5.1      | GENERAL PROCEDURE .....                                 | S12        |
| 5.2      | DATA FOR DEPROTECTED BORONATES .....                    | S12        |
| <b>6</b> | <b>DERIVATIZATION OF BORONIC ACIDS</b> .....            | <b>S13</b> |
| 6.1      | TSUJI-TROST COUPLING .....                              | S13        |
| 6.2      | TRIFLUOROBORONATE POTASSIUM SALT .....                  | S14        |
| 6.3      | Rh-CATALYZED 1,4-CONJUGATE ADDITION .....               | S14        |
| 6.4      | IODONIUM SUZUKI COUPLING .....                          | S14        |
| 6.5      | IODINATION .....                                        | S15        |
| 6.6      | CHAN-LAM COUPLING .....                                 | S15        |
| <b>7</b> | <b>CRYSTALLOGRAPHIC DATA</b> .....                      | <b>S17</b> |
| <b>8</b> | <b>REFERENCES</b> .....                                 | <b>S18</b> |
| <b>9</b> | <b>COPIES OF NMR SPECTRA</b> .....                      | <b>S18</b> |

## 1 General Considerations

Unless otherwise stated, all reactions were carried out under an Ar atmosphere using magnetic stirring. Substrate and complex syntheses are described below.

$^1\text{H}$ ,  $^{11}\text{B}$ ,  $^{13}\text{C}$  and  $^{19}\text{F}$  NMR spectra were recorded on a Varian Unity 400 MHz spectrometer ( $^1\text{H}$  399.5 MHz,  $^{11}\text{B}$  128 MHz,  $^{13}\text{C}$  100.6 MHz,  $^{19}\text{F}$  376 MHz).  $^1\text{H}$  and  $^{13}\text{C}$  chemical shifts are referenced indirectly to tetramethylsilane *via* the residual solvent signals ( $^1\text{H}$ :  $\text{CHCl}_3$  at 7.26,  $^{13}\text{C}$ :  $\text{CDCl}_3$  at 77.0 ppm).  $^{11}\text{B}$  ( $\text{BF}_3\cdot\text{Et}_2\text{O}$ ) and  $^{19}\text{F}$  ( $\text{CFCl}_3$ ) chemical shifts were calibrated to an external standard at 0.00 ppm.

High resolution accurate Electron Ionisation (EI) mass spectrometry was performed on a VG Autospec mass spectrometer at 70eV. Electrospray Ionisation (ESI) mass spectrometry was performed on a Bruker Daltonics micrOTOF II mass spectrometer.

THF was freshly distilled from  $\text{Na}^0$ /benzophenone and stored over 4Å molecular sieves under Argon. MeCN was freshly distilled after being dried over  $\text{K}_2\text{CO}_3$  and 4Å molecular sieves, and stored over 4Å molecular sieves under Argon. All other solvents used were pre-dried over 4Å molecular sieves and stored under Argon prior to use. All  $\text{H}_2\text{O}$  used was deionized and degassed (Ar). Purification by chromatography was performed using Kiesel gel 60 H silica gel (particle size 0.063-0.100 mm). Thin layer chromatography (TLC) was carried out using aluminium-backed plates coated with Kieselgel 60 (0.20 mm, UV 254) and visualized under ultraviolet light ( $\lambda = 254$  nm).

X-ray diffraction data: All the measurements were performed using graphite-monochromatized Mo  $\text{K}\alpha$  radiation at 100K using a Bruker D8 APEX-II equipped with a CCD camera. The structure was solved by direct methods (SHELXS-2014) and refined by full-matrix least-squares techniques against  $F^2$  (SHELXL-2014/7).<sup>[1]</sup> The non-hydrogen atoms were refined with anisotropic displacement parameters. The H atoms of the methyl groups were refined with common isotropic displacement parameters for the H atoms of the same group and idealized geometry and C-H distances of 0.98 Å. Aromatic H atoms are placed at idealized positions at a distance of 0.95 Å.

## 2 Origin and Synthesis of Starting Materials

(Hetero)aryne precursors **1a-c** and **h**, 4,4'-Di-*tert*-butyl-2,2'-dipyridyl, [ $\{\text{Ir}(\mu\text{-OMe})\text{COD}\}_2$ ],  $\text{Pd}(\text{dba})_2$ ,  $\text{Pd}(\text{OAc})_2$ , [ $\{\text{RhCl}(\text{COD})\}_2$ ],  $\text{Cu}(\text{OAc})_2$ ,  $\text{CuI}$ , X-Phos, 1,10-phenanthroline, inorganic salts compounds and, unless stated, all other organic reagents were obtained commercially and used without further purification. Bis(pinacolato)diboron was dried under vacuum at 50 °C overnight before use. Aryne precursors **1d**, **1g**<sup>[2]</sup> and **1e**<sup>[3]</sup> and *N-tert*-butyl- $\alpha$ -phenylnitrene<sup>[4]</sup> were prepared according to literature procedures. Aryne precursor **1f** was prepared using a modified literature procedure (*see below*).

### Synthesis of 3-(trimethylsilyl)pyridin-2-yl-trifluoromethanesulfonate (**1f**)

This compound was synthesised using a modified literature procedure.<sup>[5]</sup>

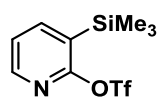

To a solution of 2-hydroxypyridine (5 g, 53 mmol) in THF (130 mL, 0.4 M) under argon, was added dropwise a 1M THF solution of LDA (117 mL, 117 mmol) at 0 °C over 20 min. The solution was allowed to warm up to 20 °C, stirred for 1 h, then cooled again to 0 °C. Chlorotrimethylsilane (7.4 mL, 58 mmol) was added dropwise over 10 min. The solution was allowed to warm up to 20 °C and stirred for 2 h. The reaction was quenched with a saturated  $\text{NH}_4\text{Cl}_{(\text{aq})}$  (80 mL) and extracted with  $\text{Et}_2\text{O}$  ( $3 \times 80$  mL). The organic phase was washed sequentially with sat.  $\text{NH}_4\text{Cl}_{(\text{aq})}$  (50 mL) and brine (50 mL), dried ( $\text{Na}_2\text{SO}_4$ ), filtered and concentrated under reduced pressure to give an orange solid. The solid was then dissolved in pyridine (53 mL, 1

M), cooled to 0 °C and Tf<sub>2</sub>O (9.8 mL, 58.3 mmol) was added dropwise over 10 min. The reaction mixture was stirred overnight at 20 °C, concentrated under reduced pressure, diluted with Et<sub>2</sub>O (100 mL) and washed with H<sub>2</sub>O (2 × 30 mL). Aqueous phases were extracted again with Et<sub>2</sub>O (3 × 30 mL). The combined organic phases were washed with brine (30 mL), dried (Na<sub>2</sub>SO<sub>4</sub>), filtered and concentrated under reduced pressure. The crude material was purified by silica gel flash chromatography (50:1 pentane/Et<sub>2</sub>O) to give the title compound as a colourless oil (12.25 g, 41 mmol, 77%). The identity of the compound was confirmed by comparison of <sup>1</sup>H, <sup>13</sup>C and <sup>19</sup>F NMR shifts to literature values.

### 3 Borylation of Aryne Precursors

#### 3.1 General Procedure for Borylation

To a 6 mL glass flask equipped with a Teflon tap and magnetic stirrer bar under argon were added [{Ir(μ-OMe)COD}<sub>2</sub>] (2.5 mol%), 4,4'-di-*tert*-butyl-2,2'-dipyridyl (5 mol%) and B<sub>2</sub>(pin)<sub>2</sub> (mmol, 0.2 equiv.) Anhydrous THF (concentration = 0.5 mmol/mL) was added and the solution stirred at room temperature for 0.5 h (until the solution acquired a deep red colour). Under a flow of argon, additional B<sub>2</sub>(pin)<sub>2</sub> (mmol, 1 equiv.) was added then precursor **1** (1 equiv.) was added with a pipette and the pipette was washed with THF (final concentration 0.5 M). The reaction mixture was sealed under argon and heated at 50 °C for 18 h, cooled to 20 °C, diluted with Et<sub>2</sub>O (30 mL) and concentrated under reduced pressure. Pentane (50 mL) was added to the deep red oil and concentrated again under reduced pressure. The crude material was purified by twice filtering through a thin pad of silica gel (9:1 pentane/Et<sub>2</sub>O).

#### 3.2 Data for Borylated Compounds.

5-(4,4,5,5-tetramethyl-1,3,2-dioxaborolan-2-yl)-2-(trimethylsilyl)phenyl trifluoromethanesulfonate (2a')

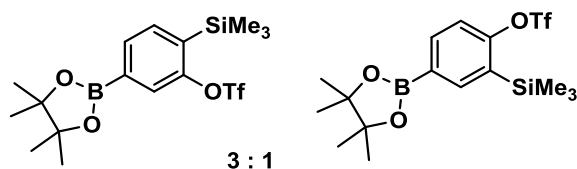

Yield = 99% (based on 3 mmol scale of **1a**), colorless solid. The regioisomers were identified by C-H correlation NMR. See page S23.

**Major isomer (2a')**: <sup>1</sup>H NMR (400 MHz, CDCl<sub>3</sub>): δ 7.74 (d, *J* = 7.2 Hz, 1H), 7.69 (s, 1H), 7.53 (d, *J* = 7.2 Hz, 1H), 1.34 (s, 12H), 0.37 (s, 9H); <sup>13</sup>C NMR (101 MHz, CDCl<sub>3</sub>): δ 154.9, 135.9, 135.7, 133.5, 125.0, 125.0, 123.2, 120.0, 118.5, 116.9, 113.7, 84.3, 24.8, -0.9; <sup>19</sup>F NMR (376 MHz, CDCl<sub>3</sub>): δ -73.9. <sup>11</sup>B NMR (128 MHz, CDCl<sub>3</sub>): δ 30.5.

**Minor isomer (2a'')**: 4-(4,4,5,5-tetramethyl-1,3,2-dioxaborolan-2-yl)-2-(trimethylsilyl)phenyl trifluoromethanesulfonate: <sup>1</sup>H NMR (400 MHz, CDCl<sub>3</sub>): δ 7.95 (s, 1H), 7.87 (dd, *J* = 8.5, 1.3 Hz, 1H), 7.33 (d, *J* = 8.5 Hz, 1H), 1.34 (s, 12H), 0.38 (s, 9H); <sup>13</sup>C NMR (101 MHz, CDCl<sub>3</sub>): δ 157.4, 142.9, 137.9, 118.5 (q, *J*<sub>CF</sub> = 321.2 Hz), 116.9, 84.1, 24.8, -0.8; <sup>19</sup>F NMR (376 MHz, CDCl<sub>3</sub>): δ -73.9; <sup>11</sup>B NMR (128 MHz, CDCl<sub>3</sub>): δ 30.5.

**Both isomers**: HRMS (ESI+): *m/z* calcd for C<sub>16</sub>H<sub>24</sub>BF<sub>3</sub>NaO<sub>5</sub>SSi 447.1050; found 447.1047.

The above general procedure can be scaled up to 6 mmol of precursor **1a** (Yield = 85%).

2-Methyl-4-(4,4,5,5-tetramethyl-1,3,2-dioxaborolan-2-yl)-6-(trimethylsilyl)phenyl trifluoromethanesulfonate (2b)

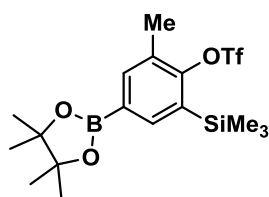

Yield = 98% (based on 3.2 mmol scale of **1b**), colorless solid.  $^1\text{H}$  NMR (400 MHz,  $\text{CDCl}_3$ ):  $\delta$  7.83 (s, 1H), 7.75 (s, 1H), 2.39 (s, 3H), 1.35 (s, 12H), 0.40 (s, 9H);  $^{13}\text{C}$  NMR (101 MHz,  $\text{CDCl}_3$ ):  $\delta$  153.5, 141.1, 140.3, 133.8, 130.4, 118.6 (q,  $J_{\text{CF}} = 319.8$  Hz), 84.1, 24.8, 17.0 (q,  $J_{\text{CF}} = 1.5$  Hz), 0.1;  $^{19}\text{F}$  NMR (376 MHz,  $\text{CDCl}_3$ ):  $\delta$  -73.4;  $^{11}\text{B}$  NMR (128 MHz,  $\text{CDCl}_3$ ):  $\delta$  30.6. HRMS (ESI+):  $m/z$  calcd for  $\text{C}_{17}\text{H}_{26}\text{BF}_3\text{NaO}_5\text{SSi}$  461.1211; found 461.1212.

2-methoxy-4-(4,4,5,5-tetramethyl-1,3,2-dioxaborolan-2-yl)-6-(trimethylsilyl)phenyl trifluoromethanesulfonate (2c)

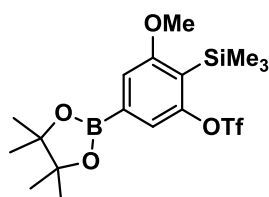

Yield = 93% (based on 3.05 mmol scale of **1c**), colorless solid.  $^1\text{H}$  NMR (400 MHz,  $\text{CDCl}_3$ ):  $\delta$  7.33 (s, 1H), 7.22 (s, 1H), 3.87 (s, 3H), 1.34 (s, 12H), 0.36 (s, 9H);  $^{13}\text{C}$  NMR (101 MHz,  $\text{CDCl}_3$ ):  $\delta$  165.0, 154.3, 124.2, 118.6 (d,  $J_{\text{CF}} = 1.4$  Hz), 118.6 (q,  $J_{\text{CF}} = 320.7$  Hz), 114.9, 84.3, 55.7, 24.8, 0.7;  $^{19}\text{F}$  NMR (376 MHz,  $\text{CDCl}_3$ ):  $\delta$  -72.8;  $^{11}\text{B}$  NMR (128 MHz,  $\text{CDCl}_3$ ):  $\delta$  30.2. HRMS (ESI+):  $m/z$  calcd for  $\text{C}_{17}\text{H}_{26}\text{BF}_3\text{NaO}_6\text{SSi}$  477.1162; found 477.1160.

2-bromo-4-(4,4,5,5-tetramethyl-1,3,2-dioxaborolan-2-yl)-6-(trimethylsilyl)phenyl trifluoromethanesulfonate (2d)

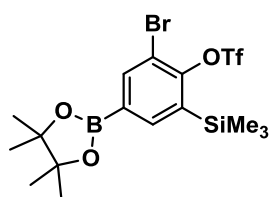

Yield = 97% (based on 2 mmol scale of **1d**), pale yellow solid.  $^1\text{H}$  NMR (400 MHz,  $\text{CDCl}_3$ ):  $\delta$  8.08 (s, 1H), 7.88 (s, 1H), 1.34 (s, 12H), 0.41 (s, 9H);  $^{13}\text{C}$  NMR (101 MHz,  $\text{CDCl}_3$ ):  $\delta$  150.8, 142.1, 142.0, 136.9, 118.6 (q,  $J_{\text{CF}} = 320.9$  Hz), 116.1, 84.5, 24.8, 0.1;  $^{19}\text{F}$  NMR (376 MHz,  $\text{CDCl}_3$ ):  $\delta$  -71.6;  $^{11}\text{B}$  NMR (128 MHz,  $\text{CDCl}_3$ ):  $\delta$  30.6. HRMS (ESI+):  $m/z$  calcd for  $\text{C}_{16}\text{H}_{23}\text{BBrF}_3\text{NaO}_5\text{SSi}$  525.0160; found 525.0174.

4-(4,4,5,5-tetramethyl-1,3,2-dioxaborolan-2-yl)-2,6-bis(trimethylsilyl)phenyl trifluoromethanesulfonate (2e)

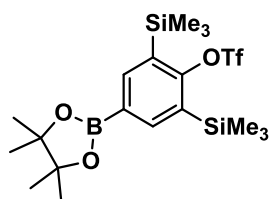

Yield = 92% (based on 1.7 mmol scale of **1e**), colorless solid.  $^1\text{H}$  NMR (400 MHz,  $\text{CDCl}_3$ ):  $\delta$  7.99 (s, 2H), 1.35 (s, 12H), 0.37 (s, 18H);  $^{13}\text{C}$  NMR (101 MHz,  $\text{CDCl}_3$ ):  $\delta$  157.5, 144.9, 142.0 (d,  $J_{\text{CF}} = 10.1$  Hz), 133.7, 118.4 (q,  $J_{\text{CF}} = 319.9$  Hz), 84.1, 24.8, 0.4;  $^{19}\text{F}$  NMR (376 MHz,  $\text{CDCl}_3$ ):  $\delta$  -72.4;  $^{11}\text{B}$  NMR (128 MHz,  $\text{CDCl}_3$ ):  $\delta$  30.4. HRMS (ESI+):  $m/z$  calcd for  $\text{C}_{19}\text{H}_{32}\text{BF}_3\text{NaO}_5\text{SSi}_2$  519.1451; found 519.1447.

5-(4,4,5,5-tetramethyl-1,3,2-dioxaborolan-2-yl)-3-(trimethylsilyl)pyridin-2-yl trifluoromethanesulfonate (2f)

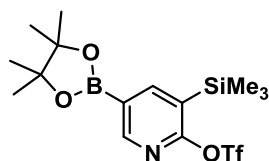

Yield = 69% (based on 6.1 mmol scale of **1f**), colorless solid.  $^1\text{H}$  NMR (400 MHz,  $\text{CDCl}_3$ ):  $\delta$  8.65 (d,  $J = 2.0$  Hz, 1H), 8.23 (d,  $J = 2.0$  Hz, 1H), 1.34 (s, 12H), 0.37 (s, 9H);  $^{13}\text{C}$  NMR (101 MHz,  $\text{CDCl}_3$ ):  $\delta$  162.8, 155.2, 153.2, 123.8, 118.5 (q,  $J_{\text{CF}} = 320.8$  Hz), 84.5, 24.8, -1.5;  $^{19}\text{F}$  NMR (376 MHz,  $\text{CDCl}_3$ ):  $\delta$  -72.8;  $^{11}\text{B}$  NMR (128 MHz,  $\text{CDCl}_3$ ):  $\delta$  30.4. HRMS (ESI+):  $m/z$  calcd for  $\text{C}_{15}\text{H}_{23}\text{BF}_3\text{NNaO}_5\text{SSi}$  448.1007; found 448.1004.

2,4-difluoro-3-(4,4,5,5-tetramethyl-1,3,2-dioxaborolan-2-yl)-6-(trimethylsilyl)phenyl trifluoromethanesulfonate (2g)

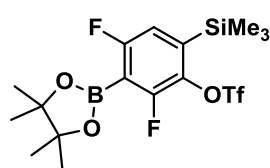

Yield = 96% (based on 1 mmol scale of **1g**), colorless solid. <sup>1</sup>H NMR (400 MHz, CDCl<sub>3</sub>): δ 6.96 (dd, *J* = 8.0, 1.6 Hz, 1H), 1.37 (s, 12H), 0.39 (s, 9H); <sup>13</sup>C NMR (101 MHz, CDCl<sub>3</sub>): δ 164.2 (dd, *J*<sub>CF</sub> = 256.3, 10.2 Hz), 156.5 (dd, *J*<sub>CF</sub> = 259.8, 12.5 Hz), 141.70 (dd, *J*<sub>CF</sub> = 6.3, 2.4 Hz), 136.6 (dd, *J*<sub>CF</sub> = 13.9, 3.8 Hz), 118.6 (q, *J*<sub>CF</sub> = 320.9 Hz), 117.0 (dd, *J*<sub>CF</sub> = 24.4, 3.9 Hz), 84.6, 24.7, -0.8; <sup>19</sup>F NMR (376 MHz, CDCl<sub>3</sub>): δ -72.0 (d, *J*<sub>FF</sub> = 21.7 Hz), -99.8 – -100.0 (m), -112.1 (qd, *J*<sub>FF</sub> = 21.7, 4.6 Hz); <sup>11</sup>B NMR (128 MHz, CDCl<sub>3</sub>): δ 29.1.

2,7-bis(4,4,5,5-tetramethyl-1,3,2-dioxaborolan-2-yl)-4-(trimethylsilyl)-1H-indol-5-yl trifluoromethanesulfonate (2h)

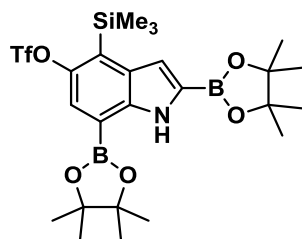

Using 2 equiv of B<sub>2</sub>Pin<sub>2</sub>. In a mixture with B<sub>2</sub>Pin<sub>2</sub> (about 2 : 1). Yield = 54% (based on 3.05 mmol scale of **1h**), colorless solid. <sup>1</sup>H NMR (400 MHz, C<sub>6</sub>D<sub>6</sub>): δ 9.92 (br s, 1H), 8.09 (s, 1H), 7.74 (d, *J* = 2.1 Hz, 1H), 1.09 (s, 12H), 0.95 (s, 12H), 0.52 (s, 9H); <sup>13</sup>C NMR (101 MHz, CDCl<sub>3</sub>): δ 148.4, 140.6, 132.1, 129.0, 122.5, 118.7 (q, *J*<sub>CF</sub> = 320.6 Hz), 115.3, 84.4, 84.3, 24.9, 24.8, 1.1; <sup>19</sup>F NMR (376 MHz, C<sub>6</sub>D<sub>6</sub>): δ -73.5; <sup>11</sup>B NMR (128 MHz, CDCl<sub>3</sub>): δ 30.5. HRMS (EI+): *m/z* calcd for C<sub>24</sub>H<sub>36</sub>B<sub>2</sub>NO<sub>7</sub>F<sub>3</sub>SSi 589.2120; found 589.2136.

## Procedures for the Capture of Boryl Arynes

### 3.3 General Procedure

A 6 mL glass flask equipped with a Teflon tap and magnetic stirrer was charged with the appropriate aryne precursor (**2**) (0.2 mmol, unless otherwise noted), trapping reagent (indicated in each case below), CsF (as indicated below) and 18-crown-6 (53 mg, 0.2 mmol, 1 equiv.). The flask was evacuated and backfilled with argon. MeCN (2 mL) was then added and the resulting suspension stirred at the indicated temperature. The reaction was monitored by <sup>19</sup>F NMR. Upon complete consumption of **2**, the reaction mixture was diluted with Et<sub>2</sub>O (20 mL) and washed with brine (2 × 15 mL), dried (Na<sub>2</sub>SO<sub>4</sub>), concentrated under reduced pressure and purified by silica gel flash chromatography using the indicated eluent system.

### 3.4 Data for Aryne Capture Compounds

#### N-phenyl-3-(4,4,5,5-tetramethyl-1,3,2-dioxaborolan-2-yl)aniline (4a)

Aryne precursor: **2a**, capture reagent: aniline (93 mg, 1 mmol, 5 equiv.), CsF (122 mg, 0.8 mmol, 4 equiv.), reaction temperature: 60 °C, reaction time: 7 h. Column chromatography eluent: pentane/Et<sub>2</sub>O (8 : 1), R<sub>f</sub> = 0.2. Yield = 83% (based on **2a**), yellow oil.

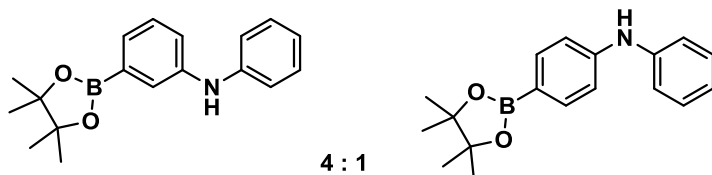

**Major isomer:** <sup>1</sup>H NMR (400 MHz, C<sub>6</sub>D<sub>6</sub>): 7.81 (ddd, *J* = 7.2, 1.1, 1.1 Hz, 1H), 7.78 (br d, *J* = 2.4 Hz, 1H), 7.09 – 6.99 (m, 3H), 6.89 – 6.83 (m, 3H, partially obscured by minor isomer), 6.78 (tt, *J* = 7.4,

1.1 Hz, 1H), 5.11 (s, 1H), 1.13 (s, 12H);  $^{13}\text{C}$  NMR (101 MHz,  $\text{C}_6\text{D}_6$ ):  $\delta$  143.4, 142.6, 129.1, 128.7, 127.7, 124.9, 120.5, 119.0, 117.5, 83.4, 24.6;  $^{11}\text{B}$  NMR (128 MHz,  $\text{C}_6\text{D}_6$ ):  $\delta$  31.4.

**Minor isomer:** N-phenyl-4-(4,4,5,5-tetramethyl-1,3,2-dioxaborolan-2-yl)aniline.  $^1\text{H}$  NMR (400 MHz,  $\text{C}_6\text{D}_6$ ):  $\delta$  8.15 (m, 2H), 7.21 – 7.13 (m, 4H, partially obscured by  $\text{C}_6\text{D}_6$ ), 7.02 (ddd,  $J = 8.1, 2.5, 1.1$  Hz, 2H), 6.85 – 6.81 (m, 1H, partially obscured by major isomer), 5.18 (s, 1H), 1.16 (s, 12H);  $^{13}\text{C}$  NMR (101 MHz,  $\text{C}_6\text{D}_6$ ):  $\delta$  146.3, 142.0, 136.6, 129.1, 121.5, 120.9, 115.7, 83.1, 24.6;  $^{11}\text{B}$  NMR (128 MHz,  $\text{C}_6\text{D}_6$ ):  $\delta$  31.4.

**Both isomers:** HRMS (EI+):  $m/z$  calcd for  $\text{C}_{18}\text{H}_{22}\text{NO}_2\text{B}$  295.1744; found 295.1750.

#### 4-(3-methoxy-5-(4,4,5,5-tetramethyl-1,3,2-dioxaborolan-2-yl)phenyl)morpholine (4b)

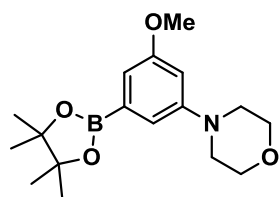

Aryne precursor: **2c**, capture reagent: morpholine (52 mg, 0.6 mmol, 3 equiv.), CsF (122 mg, 0.8 mmol, 4 equiv.), reaction temperature: 60 °C, reaction time: 6 h. Column chromatography eluent: pentane/ $\text{Et}_2\text{O}$  (2.5 : 1),  $R_f = 0.2$ . Yield = 67% (based on **2c**), colorless solid.  $^1\text{H}$  NMR (400 MHz,  $\text{CDCl}_3$ ):  $\delta$  7.01 (d,  $J = 2.1$  Hz, 1H), 6.87 (d,  $J = 1.7$  Hz, 1H), 6.56 (br s, 1H), 3.88 – 3.83 (m, 4H), 3.82 (s, 3H), 3.22 – 3.15 (m, 4H), 1.34 (s, 12H);  $^{13}\text{C}$  NMR (101 MHz,  $\text{CDCl}_3$ ):  $\delta$  160.1, 125.5, 115.0, 109.7, 106.0, 83.8, 66.8, 55.3, 49.4, 24.8;  $^{11}\text{B}$  NMR (128 MHz,  $\text{CDCl}_3$ ):  $\delta$  30.7. HRMS (EI+):  $m/z$  calcd for  $\text{C}_{17}\text{H}_{26}\text{NO}_4\text{B}$  319.1955; found 319.1951.

#### 4-(3-(4,4,5,5-tetramethyl-1,3,2-dioxaborolan-2-yl)-5-(trimethylsilyl)phenyl)morpholine (4c)

Aryne precursor: **2e**, capture reagent: morpholine (52 mg, 0.6 mmol, 3 equiv.), CsF (122 mg, 0.8 mmol, 4 equiv.), reaction temperature: 60 °C, reaction time: 5 h. Column chromatography eluent: pentane/ $\text{Et}_2\text{O}$  (6 : 1).  $R_f = 0.2$ . Yield = 62% (based on **2e**), colorless solid.

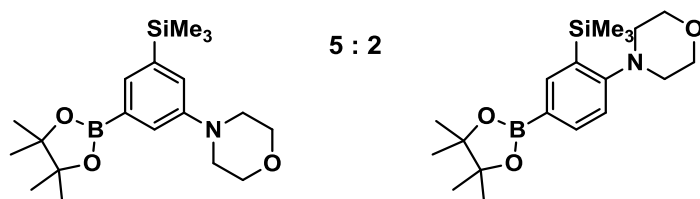

**Major regioisomer:**  $R_f = 0.2$ .  $^1\text{H}$  NMR (400 MHz,  $\text{CDCl}_3$ ):  $\delta$  7.51 (s, 1H), 7.37 (d,  $J = 2.0$  Hz, 1H), 7.19 (br s, 1H), 3.93 – 3.84 (m, 4H), 3.28 – 3.18 (m, 4H), 1.35 (s, 12H), 0.28 (s, 9H);  $^{13}\text{C}$  NMR (101 MHz,  $\text{CDCl}_3$ ):  $\delta$  150.0, 140.5, 131.6, 123.9, 122.5, 83.7, 67.0, 49.7, 24.8, -1.0;  $^{11}\text{B}$  NMR (128 MHz,  $\text{CDCl}_3$ ):  $\delta$  31.0. HRMS (ESI+):  $m/z$  calcd for  $\text{C}_{19}\text{H}_{33}\text{BNO}_3\text{Si}$  362.2321; found 362.2314.

**Minor regioisomer:** 4-(4-(4,4,5,5-tetramethyl-1,3,2-dioxaborolan-2-yl)-2-(trimethylsilyl)phenyl)morpholine.  $R_f = 0.4$ .  $^1\text{H}$  NMR (400 MHz,  $\text{CDCl}_3$ ):  $\delta$  7.95 (d,  $J = 1.3$  Hz, 1H), 7.86 (dd,  $J = 8.0, 1.3$  Hz, 1H), 7.31 (d,  $J = 8.0$  Hz, 1H), 3.89 – 3.80 (m, 4H), 2.93 – 2.83 (m, 4H), 1.33 (s, 12H), 0.32 (s, 9H);  $^{13}\text{C}$  NMR (101 MHz,  $\text{CDCl}_3$ ):  $\delta$  162.2, 142.2, 137.6, 137.1, 121.8, 83.7, 67.2, 54.1, 24.8, 0.1;  $^{11}\text{B}$  NMR (128 MHz,  $\text{CDCl}_3$ ):  $\delta$  30.9. HRMS (EI+):  $m/z$  calcd for  $\text{C}_{19}\text{H}_{32}\text{BNO}_3\text{Si}$  361.2245; found 361.2250.

#### 4-(3,5-difluorophenyl)morpholine (4d)

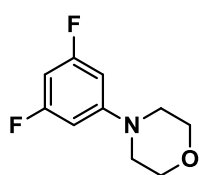

Aryne precursor: **2g** (scale: 0.3 mmol), capture reagent: morpholine (78 mg, 0.9 mmol, 3 equiv.), CsF (228 mg, 1 mmol, 5 equiv.), reaction temperature: 60 °C, reaction time: 5 h. Column chromatography eluent: pentane/ $\text{Et}_2\text{O}$  (8 : 1).  $R_f = 0.2$ . Yield = 64% (based on **2g**), colorless solid.  $^1\text{H}$  NMR (400 MHz,  $\text{CDCl}_3$ ):  $\delta$  6.40 – 6.32 (m, 2H), 6.29 (tt,  $J = 8.8, 2.2$  Hz, 1H), 3.86 – 3.80 (m, 4H), 3.18 – 3.09 (m,

4H);  $^{13}\text{C}$  NMR (101 MHz,  $\text{CDCl}_3$ ):  $\delta$  165.2 (d,  $J_{\text{CF}} = 15.8$  Hz), 162.8 (d,  $J_{\text{CF}} = 15.9$  Hz), 153.2 (t,  $J_{\text{CF}} = 12.2$  Hz), 98.0 – 97.5 (m), 94.5 (t,  $J_{\text{CF}} = 26.1$  Hz), 66.5 (s), 48.3 (s);  $^{19}\text{F}$  NMR (376 MHz,  $\text{CDCl}_3$ ):  $\delta$  -109.7 – -109.8 (m). HRMS (EI+):  $m/z$  calcd for  $\text{C}_{10}\text{H}_{11}\text{NOF}_2$  199.0809; found 199.0804.

### 3-methyl-5-(4,4,5,5-tetramethyl-1,3,2-dioxaborolan-2-yl)phenyl 2-iodobenzoate (4e)

Aryne precursor: **2b**, capture reagent: 2-iodobenzoic acid (88 mg, 0.24 mmol, 1.2 equiv.), CsF (152 mg, 1 mmol, 5 equiv.), 18-crown-6 (158 mg, 0.6 mmol, 3 equiv.), reaction temperature: 60 °C, reaction time: 24 h. Column chromatography eluent: pentane/ $\text{Et}_2\text{O}$  (12 : 1),  $R_f = 0.6$ . Yield = 61% (based on **2b**), colorless oil.

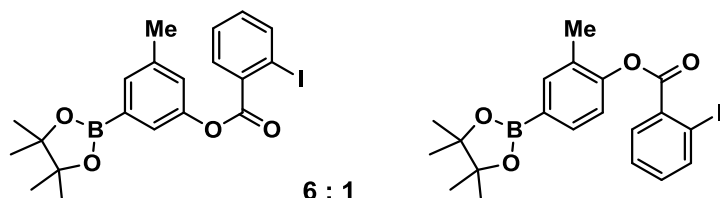

**Major regioisomer:**  $^1\text{H}$  NMR (400 MHz,  $\text{C}_6\text{C}_6$ ):  $\delta$  7.98 – 7.94 (m, 1H), 7.84 – 7.81 (m, 1H), 7.70 (dd,  $J = 7.7, 1.7$  Hz, 1H), 7.69 (dd,  $J = 7.9, 1.1$  Hz, 1H), 7.13 – 7.11 (m, 1H), 6.82 (td,  $J = 7.7, 1.1$  Hz, 1H), 6.51 (td,  $J = 7.9, 1.7$  Hz, 1H), 2.05 (d,  $J = 0.5$  Hz, 3H), 1.12 (s, 12H);  $^{13}\text{C}$  NMR (101 MHz,  $\text{C}_6\text{C}_6$ ):  $\delta$  164.5, 150.8, 141.2, 138.9, 133.4, 132.3, 131.2, 129.7, 127.4, 125.4, 124.9, 94.4, 83.5, 24.5, 20.6;  $^{11}\text{B}$  NMR (128 MHz,  $\text{C}_6\text{C}_6$ ):  $\delta$  30.7.

**Minor regioisomer:** 2-methyl-4-(4,4,5,5-tetramethyl-1,3,2-dioxaborolan-2-yl)phenyl 2-iodobenzoate  $^1\text{H}$  NMR (400 MHz,  $\text{C}_6\text{C}_6$ ):  $\delta$  8.03 – 8.01 (m, 1H), 7.77 (dd,  $J = 7.8, 1.7$  Hz, 1H), 7.72 – 7.70 (m, 1H, partially obscured by major isomer), 7.14 (s, 1H), 6.83 (td,  $J = 7.6, 1.2$  Hz, 1H), 6.54 – 6.49 (m, 1H, partially obscured by major isomer), 2.12 (s, 3H), 1.16 (s, 12H);  $^{13}\text{C}$  NMR (101 MHz,  $\text{C}_6\text{C}_6$ ):  $\delta$  163.7, 152.3, 141.5, 138.3, 134.5, 134.0, 132.5, 131.1, 129.7, 127.5, 121.6, 94.6, 83.4, 24.6, 15.9;  $^{11}\text{B}$  NMR (128 MHz,  $\text{C}_6\text{C}_6$ ):  $\delta$  30.7.

**Both isomers:** HRMS (ESI+):  $m/z$  calcd for  $\text{C}_{20}\text{H}_{22}\text{BINaO}_4$  487.0552; found 487.0561.

### 3-(3-methoxy-5-(4,4,5,5-tetramethyl-1,3,2-dioxaborolan-2-yl)phenoxy)benzonitrile (4f)

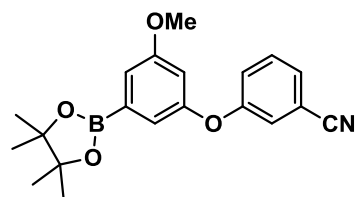

Aryne precursor: **2c**, capture reagent: 3-cyanophenol (36 mg, 0.3 mmol, 1.5 equiv.), CsF (152 mg, 1 mmol, 5 equiv.), reaction temperature: 60 °C, reaction time: 7 h. Column chromatography eluent: pentane/ $\text{Et}_2\text{O}$  (8 : 1),  $R_f = 0.2$ . Yield = 63% (based on **2c**), colorless oil.  $^1\text{H}$  NMR (400 MHz,  $\text{CDCl}_3$ ):  $\delta$  7.40 (t,  $J = 7.8$  Hz, 1H), 7.33 (d,  $J = 7.8$  Hz, 1H), 7.24 – 7.15 (m, 3H), 7.05 (s, 1H), 6.71 – 6.66 (m, 1H), 3.83 (s, 3H), 1.34 (s, 12H);  $^{13}\text{C}$  NMR (101 MHz,  $\text{CDCl}_3$ ):  $\delta$  160.7, 158.3, 156.0, 130.9, 126.2, 122.7, 120.9, 118.0, 115.4, 113.4, 109.8, 84.1, 55.6, 24.8;  $^{11}\text{B}$  NMR (128 MHz,  $\text{CDCl}_3$ ):  $\delta$  30.9. HRMS (ESI+):  $m/z$  calcd for  $\text{C}_{20}\text{H}_{22}\text{BNNaO}_4$  374.1538; found 374.1531.

### 3-(3-(4,4,5,5-tetramethyl-1,3,2-dioxaborolan-2-yl)-5-(trimethylsilyl)phenoxy)benzonitrile and 4-(4-(4,4,5,5-tetramethyl-1,3,2-dioxaborolan-2-yl)-2-(trimethylsilyl)phenoxy)benzonitrile (4g)

Aryne precursor: **2e**, capture reagent: 3-cyanophenol (71 mg, 0.6 mmol, 3 equiv.), CsF (152 mg, 1 mmol, 5 equiv.), reaction temperature: 40 °C, reaction time: 20 h. Column chromatography eluent: pentane/ $\text{Et}_2\text{O}$  (30 : 1),  $R_f = 0.2$ . Yield = 62% (based on **2e**), colorless oil.



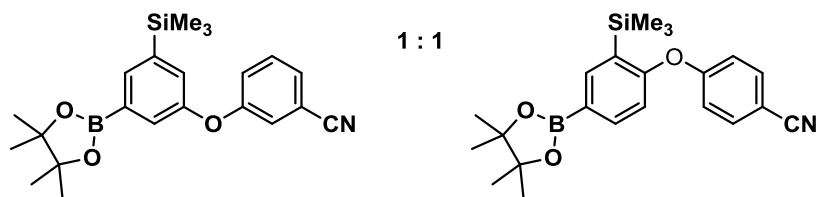

$^1\text{H}$  NMR (400 MHz,  $\text{C}_6\text{D}_6$ ):  $\delta$  8.44 (d,  $J = 1.4$  Hz, 1H), 8.25 (s, 1H), 8.05 (dd,  $J = 8.2, 1.6$  Hz, 1H), 7.83 – 7.76 (m, 1H), 7.44 – 7.39 (m, 1H), 6.97 (s, 1H), 6.89 (s, 1H), 6.78 – 6.70 (m, 2H), 6.66 (d,  $J = 7.8$  Hz, 2H), 6.57 (t,  $J = 8.0$  Hz, 1H), 6.54 – 6.45 (m, 2H), 1.16 (s, 12H), 1.09 (s, 12H), 0.23 (s, 9H), 0.13 (s, 9H);  $^{13}\text{C}$  NMR (101 MHz,  $\text{C}_6\text{D}_6$ ):  $\delta$  163.5, 158.0, 157.4, 155.2, 143.8, 143.1, 142.9, 138.3, 136.1, 130.2, 130.1, 130.1, 126.2, 126.0, 125.9, 122.4, 121.6, 121.3, 121.0, 117.8, 117.8, 117.0, 114.0, 113.9, 83.7, 83.5, 24.6, 24.5, -1.2, -1.7;  $^{11}\text{B}$  NMR (128 MHz,  $\text{C}_6\text{D}_6$ ):  $\delta$  30.9. HRMS (ESI+):  $m/z$  calcd for  $\text{C}_{22}\text{H}_{28}\text{BNNaO}_3\text{Si}$  416.1828; found 416.1832.

### 3-bromo-2-(pyridin-3-yl)-5-(4,4,5,5-tetramethyl-1,3,2-dioxaborolan-2-yl)phenol (4h)

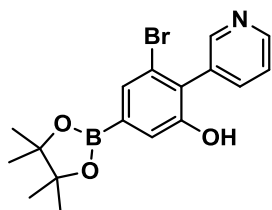

Aryne precursor: **2d**, capture reagent: pyridine *N*-oxide (29 mg, 0.3 mmol, 1.5 equiv.), CsF (152 mg, 1 mmol, 5 equiv.), reaction temperature: 60 °C, reaction time: 24 h. Column chromatography eluent: DCM/MeOH (100 : 2),  $R_f = 0.2$ . Yield = 41% (based on **2d**), yellow solid.  $^1\text{H}$  NMR (400 MHz,  $\text{C}_6\text{D}_6$ ):  $\delta$  8.47 (s, 1H), 8.12 (s, 1H), 8.04 (d,  $J = 3.2$  Hz, 1H), 7.77 (s, 1H), 7.34 (d,  $J = 7.8$  Hz, 1H), 6.60 (dd,  $J = 6.9, 5.5$  Hz, 1H), 1.09 (s, 12H);  $^{13}\text{C}$  NMR (101 MHz,  $\text{C}_6\text{D}_6$ ):  $\delta$  155.9, 149.9, 146.9, 138.8, 133.8, 130.3, 128.9, 124.2, 123.0, 121.7, 83.8, 24.5;  $^{11}\text{B}$  NMR (128 MHz,  $\text{C}_6\text{D}_6$ ):  $\delta$  29.9. HRMS (ESI+):  $m/z$  calcd for  $\text{C}_{17}\text{H}_{20}\text{BBrNO}_3$  376.0717; found 376.0726. For crystallographic data, see page S17.

### 2-(3-methoxy-5-(naphthalen-2-ylthio)phenyl)-4,4,5,5-tetramethyl-1,3,2-dioxaborolane (4i)

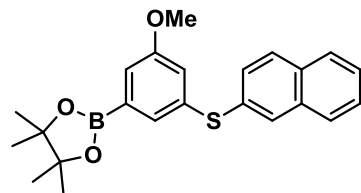

Aryne precursor: **2c**, capture reagent: 2-Naphtalenethiol (48 mg, 0.3 mmol, 1.5 equiv.), CsF (152 mg, 1 mmol, 5 equiv.), reaction temperature: 60 °C, reaction time: 7 h. Column chromatography eluent: pentane/ $\text{Et}_2\text{O}$  (19 : 1),  $R_f = 0.35$ . Yield = 74% (based on **2c**), colorless solid.  $^1\text{H}$  NMR (400 MHz,  $\text{CDCl}_3$ ):  $\delta$  7.86 – 7.71 (m, 4H), 7.56 (s, 1H), 7.50 – 7.43 (m, 2H), 7.41 (d,  $J = 8.6$  Hz, 1H), 7.26 (d,  $J = 1.7$  Hz, 1H), 7.00 (s, 1H), 3.77 (s, 3H), 1.35 (s, 12H);  $^{13}\text{C}$  NMR (101 MHz,  $\text{CDCl}_3$ ):  $\delta$  159.7, 136.3, 133.8, 133.3, 132.2, 130.1, 129.4, 128.8, 128.5, 127.7, 127.4, 126.5, 126.1, 120.3, 118.1, 84.1, 55.4, 24.9;  $^{11}\text{B}$  NMR (128 MHz,  $\text{CDCl}_3$ ):  $\delta$  31.0. HRMS (ESI+):  $m/z$  calcd for  $\text{C}_{23}\text{H}_{25}\text{BNaO}_3\text{S}$  415.1514; found 415.1508.

### 2-(8-methoxy-1,4-dihydro-1,4-epoxynaphthalen-6-yl)-4,4,5,5-tetramethyl-1,3,2-dioxaborolane (4j)

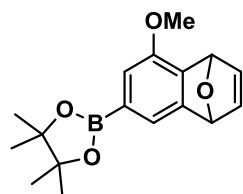

Aryne precursor: **2c**, capture reagent: Furan (68 mg, 1 mmol, 5 equiv.), CsF (91 mg, 0.6 mmol, 3 equiv.), reaction temperature: 40 °C, reaction time: 17h h. Column chromatography eluent: pentane/ $\text{Et}_2\text{O}$  (6 : 1),  $R_f = 0.2$ . Yield = 83% (based on **2c**), colorless oil.  $^1\text{H}$  NMR (400 MHz,  $\text{CDCl}_3$ ):  $\delta$  7.36 (s, 1H), 7.07 (s, 1H), 7.07 – 6.99 (m, 2H), 5.94 (s, 1H), 5.69 (s, 1H), 3.87 (s, 3H), 1.33 (s, 12H);  $^{13}\text{C}$  NMR (101 MHz,  $\text{CDCl}_3$ )  $\delta$  152.5, 150.9, 143.1, 142.5, 138.7, 119.2, 116.8, 83.7, 82.4, 79.9, 55.62, 24.8, 24.7;  $^{11}\text{B}$  NMR (128 MHz,  $\text{CDCl}_3$ ):  $\delta$  30.5. HRMS (ESI+):  $m/z$  calcd for  $\text{C}_{17}\text{H}_{21}\text{BNaO}_4$  323.1428; found 323.1431.

1-(3-bromophenyl)-4-methyl-6-(4,4,5,5-tetramethyl-1,3,2-dioxaborolan-2-yl)-1H-benzo[d][1,2,3]triazole (4k)

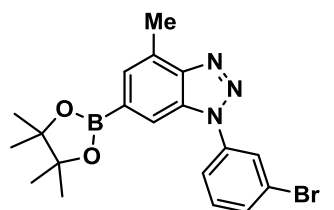

Aryne precursor: **2b**, capture reagent: 1-azido-3-bromobenzene (0.5 M in *tert*-butyl methyl ether) (0.6 mL, 59 mg, 0.3 mmol, 1.5 equiv.), CsF (152 mg, 1 mmol, 5 equiv.), reaction temperature: 60 °C, reaction time: 6 h. Column chromatography eluent: pentane/Et<sub>2</sub>O (8 : 1), R<sub>f</sub> = 0.3. Yield = 44% (based on **2b**), colorless solid. <sup>1</sup>H NMR (400 MHz, c<sub>6</sub>d<sub>6</sub>): δ 8.15 (s, 1H), 7.90 (s, 1H), 7.81 (dd, *J* = 1.7, 1.7 Hz, 1H), 7.18 (d, *J* = 8.1 Hz, 1H), 7.06 (d, *J* = 8.1 Hz, 1H), 6.52 (t, *J* = 8.1 Hz, 1H), 2.79 (s, 3H), 1.16 (s, 12H); <sup>13</sup>C NMR (101 MHz, CDCl<sub>3</sub>): δ 148.0, 138.2, 131.9, 131.6, 131.0, 130.4, 129.9, 126.3, 123.3, 121.6, 114.2, 84.3, 24.9, 16.6; <sup>11</sup>B NMR (128 MHz, CDCl<sub>3</sub>): δ 30.9. HRMS (EI+): *m/z* calcd for C<sub>19</sub>H<sub>21</sub>BN<sub>3</sub>O<sub>2</sub>Br 413.0910; found 413.0915.

NOESY NMR analysis (see page S85) indicates only one correlation of the methyl group to an ArH signal, plus a correlation between the two rings, as indicated below:

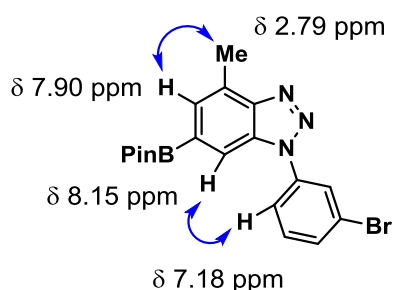

2-(*tert*-butyl)-3-phenyl-6-(4,4,5,5-tetramethyl-1,3,2-dioxaborolan-2-yl)-2,3-dihydrobenzo[d]isoxazole (4l)

Aryne precursor: **2a**, capture reagent: benzylidene-*tert*-butylamine *N*-oxide (53 mg, 0.3 mmol, 1.5 equiv.), CsF (122 mg, 0.8 mmol, 4 equiv.), reaction temperature: 60 °C, reaction time: 22 h. Column chromatography eluent: pentane/Et<sub>2</sub>O (40 : 1), R<sub>f</sub> = 0.3. Yield = 70% (based on **2a**), colorless solid. The regioisomers were identified by C-H correlation NMR. See page S89.

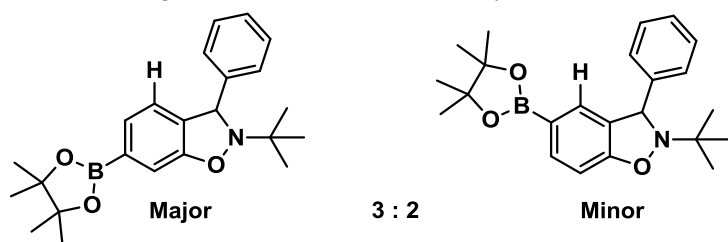

**Major regioisomer:** <sup>1</sup>H NMR (400 MHz, C<sub>6</sub>D<sub>6</sub>): 7.64 (s, 1H), 7.59 (dd, *J* = 7.4, 0.8 Hz, 1H), 7.35 – 7.28 (m, 2H, partially obscured by minor regioisomer), 7.08 – 7.02 (m, 2H), 7.02 – 6.95 (m, 1H, partially obscured by minor regioisomer), 6.76 (dd, *J* = 7.4, 0.6 Hz, 1H), 5.36 (s, 1H), 1.02 (s, 9H, partially obscured by minor regioisomer), 1.01 (s, 12H, partially obscured by minor regioisomer); <sup>13</sup>C NMR (101 MHz, C<sub>6</sub>D<sub>6</sub>): δ 156.3, 144.2, 133.5, 128.4, 127.7, 127.1, 127.2, 123.2, 112.6, 83.4, 67.0, 60.5, 25.1, 25.1, 24.4; <sup>11</sup>B NMR (128 MHz, CDCl<sub>3</sub>): δ 30.8.

**Minor regioisomer:** 2-(*tert*-butyl)-3-phenyl-5-(4,4,5,5-tetramethyl-1,3,2-dioxaborolan-2-yl)-2,3-dihydrobenzo[d]isoxazole

<sup>1</sup>H NMR (400 MHz, C<sub>6</sub>D<sub>6</sub>): δ 7.89 (dd, *J* = 8.7, 1.0 Hz, 1H), 7.74 (s, 1H), 7.35 – 7.28 (m, 2H, partially obscured by major regioisomer), 7.02 – 6.95 (m, 2H, partially obscured by major regioisomer), 6.95 – 6.89 (m, 1H), 6.70 (d, *J* = 8.0 Hz, 1H), 5.40 (s, 1H), 1.02 (s, 9H, partially obscured by major

regioisomer), 1.01 (s, 12H, partially obscured by major regioisomer);  $^{13}\text{C}$  NMR (101 MHz,  $\text{C}_6\text{D}_6$ ):  $\delta$  159.0, 144.2, 136.4, 130.7, 130.2, 128.4, 127.3, 127.1, 106.3, 83.1, 66.7, 60.6, 24.6, 24.5, 24.5;  $^{11}\text{B}$  NMR (128 MHz,  $\text{CDCl}_3$ ):  $\delta$  30.8.

**Both isomers:** HRMS (EI+):  $m/z$  calcd for  $\text{C}_{23}\text{H}_{30}\text{BNO}_3$  379.2319; found 379.2314.

4-bromo-2-(tert-butyl)-3-phenyl-6-(4,4,5,5-tetramethyl-1,3,2-dioxaborolan-2-yl)-2,3-dihydrobenzo[d]isoxazole (4m)

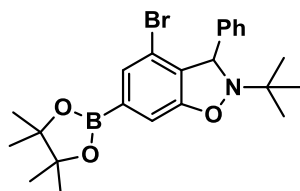

Aryne precursor: **2d**, capture reagent: Benzylidene-tert-butylamine-*N*-oxide (53 mg, 0.3 mmol, 1.5 equiv.), CsF (122 mg, 0.8 mmol, 4 equiv.), reaction temperature: 60 °C, reaction time: 30h. Column chromatography eluent: pentane/ $\text{Et}_2\text{O}$  (40 : 1),  $R_f$  = 0.2. Yield = 45% (based on **2d**), yellow solid.  $^1\text{H}$  NMR (400 MHz,  $\text{CDCl}_3$ ):  $\delta$  7.46 (s, 1H), 7.33 – 7.20 (m, 6H), 5.53 (s, 1H), 1.34 (s, 12H), 1.17 (s, 9H);  $^{13}\text{C}$  NMR (101 MHz,  $\text{CDCl}_3$ ):  $\delta$  158.2, 141.3, 132.4, 130.6, 128.5, 128.1, 127.6, 117.7, 111.4, 84.2, 67.8, 61.7, 25.3, 24.9, 24.8;  $^{11}\text{B}$  NMR (128 MHz,  $\text{CDCl}_3$ ):  $\delta$  30.1. HRMS (ESI+):  $m/z$  calcd for  $\text{C}_{23}\text{H}_{30}\text{BBrNO}_3$  458.1501; found 458.1493. For crystallographic data, see page S17.

1,4-dimethyl-7-(4,4,5,5-tetramethyl-1,3,2-dioxaborolan-2-yl)-1,2,3,4-tetrahydro-5H-pyrido[2,3-e][1,4]diazepin-5-one (4n)

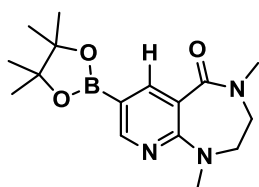

Aryne precursor: **2f**, capture reagent: pyridine *N*-oxide (114 mg, 1 mmol, 5 equiv.), CsF (122 mg, 0.8 mmol, 4 equiv.), reaction temperature: 20 °C, reaction time: 5 days. Column chromatography eluent: DCM/ $\text{MeOH}$  (19 : 1),  $R_f$  = 0.3. Yield = 39% (based on **2f**), colorless solid. The regioisomer was identified by C-H correlation NMR. See page S96.  $^1\text{H}$  NMR (400 MHz,  $\text{CDCl}_3$ ):  $\delta$  8.58 (d,  $J$  = 1.6 Hz, 1H), 8.38 (d,  $J$  = 1.6 Hz, 1H), 3.64 – 3.57 (m, 2H), 3.55 – 3.48 (m, 2H), 3.15 (s, 3H), 3.10 (s, 3H), 1.29 (s, 12H);  $^{13}\text{C}$  NMR (101 MHz,  $\text{CDCl}_3$ ):  $\delta$  169.1, 157.0, 156.6, 147.3, 117.5, 83.6, 55.8, 47.7, 38.8, 35.5, 24.8;  $^{11}\text{B}$  NMR (128 MHz,  $\text{CDCl}_3$ ):  $\delta$  30.7. HRMS (EI+):  $m/z$  calcd for  $\text{C}_{16}\text{H}_{24}\text{N}_3\text{O}_3\text{B}$  317.1911; found 317.1919.

## 4 Suzuki-Miyaura Reactions

A 6 mL glass flask equipped with a Teflon cap and magnetic stirrer was charged with the appropriate boronate (0.2 mmol, 1 equiv.), aryl bromide (0.24 mmol, 1.2 equiv.),  $\text{Pd}(\text{OAc})_2$  (2 mg, 0.004 mmol, 2 mol%), X-Phos (3.8 mg, 0.008 mmol, 4 mol%) and  $\text{K}_3\text{PO}_4$  (85 mg, 0.4 mmol, 2 equiv.). The flask was evacuated and backfilled with argon. Toluene (1 mL) and  $\text{H}_2\text{O}$  (0.1 ml) were added and the resulting suspension was stirred for 18 h at 80 °C. The reaction mixture was diluted with  $\text{Et}_2\text{O}$  (20 mL) and washed with brine (15 ml), dried ( $\text{Na}_2\text{SO}_4$ ), concentrated under reduced pressure and purified by silica gel flash chromatography using the indicated eluent system.

4'-acetyl-3-methyl-5-(trimethylsilyl)-[1,1'-biphenyl]-4-yl trifluoromethanesulfonate (5a)

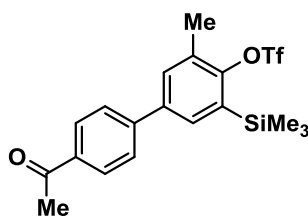

Boronate: **2b**, coupling partner: 4-bromoacetophenone (48 mg, 0.24 mmol). Column chromatography eluent: pentane/ $\text{Et}_2\text{O}$  (18 : 1),  $R_f$  = 0.2. Yield = 86% (based on **2b**), yellow solid.  $^1\text{H}$  NMR (400 MHz,  $\text{CDCl}_3$ ):  $\delta$  8.05 (d,  $J$  = 8.3 Hz, 2H), 7.64 (d,  $J$  = 8.3 Hz, 2H), 7.58 (d,  $J$  = 2.3 Hz, 1H), 7.51 (d,  $J$  = 2.3 Hz, 1H), 2.65 (s, 3H), 2.46 (s, 3H), 0.43 (s, 9H);  $^{13}\text{C}$  NMR (101 MHz,  $\text{CDCl}_3$ ):  $\delta$  197.5, 151.0, 144.3, 139.6, 136.3, 135.6,

133.3, 132.5, 131.9, 128.9, 127.4, 118.6 (q,  $J_{CF} = 319.9$  Hz), 26.7, 17.5 (m), 0.1;  $^{19}\text{F}$  NMR (376 MHz,  $\text{CDCl}_3$ ):  $\delta$  -73.3. HRMS (EI+):  $m/z$  calcd for  $\text{C}_{19}\text{H}_{21}\text{O}_4\text{F}_3\text{SSi}$  430.0882; found 430.0879.

5-(anthracen-9-yl)-3-methoxy-2-(trimethylsilyl)phenyl trifluoromethanesulfonate (5b)

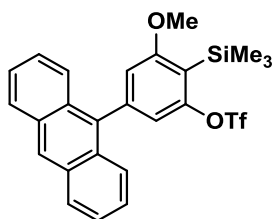

Boronate: **2c**, coupling partner: 9-bromoanthracene (62 mg, 0.24 mmol). Column chromatography eluent: pentane/ $\text{Et}_2\text{O}$  (18 : 1),  $R_f = 0.2$ . Yield = 97% (based on **2c**), yellow solid.  $^1\text{H}$  NMR (400 MHz,  $\text{CDCl}_3$ ):  $\delta$  8.52 (s, 1H), 8.05 (d,  $J = 8.4$  Hz, 2H), 7.64 (d,  $J = 8.6$  Hz, 2H), 7.53 – 7.44 (m, 2H), 7.44 – 7.36 (m, 2H), 7.03 (s, 1H), 6.89 (d,  $J = 0.7$  Hz, 1H), 3.78 (s, 3H), 0.48 (s, 9H);  $^{13}\text{C}$  NMR (101 MHz,  $\text{CDCl}_3$ ):  $\delta$  165.4, 154.6, 143.0, 134.6, 131.2, 129.8, 128.4, 127.3, 126.1, 125.9, 125.3, 120.1, 118.6 (q,  $J_{CF} = 320.9$  Hz), 115.9 (m), 112.6, 55.7, 0.9;  $^{19}\text{F}$  NMR (376 MHz,  $\text{CDCl}_3$ ):  $\delta$  -72.6. HRMS (EI+):  $m/z$  calcd for  $\text{C}_{25}\text{H}_{23}\text{O}_4\text{F}_3\text{SSi}$  504.1038; found 504.1024.

4-(thiophen-2-yl)-2,6-bis(trimethylsilyl)phenyl trifluoromethanesulfonate (5c)

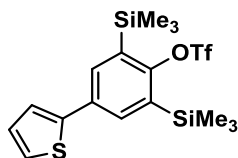

Boronate: **2e**, coupling partner: 2-bromothiophene (39 mg, 0.24 mmol). Column chromatography eluent: pentane,  $R_f = 0.3$ . Yield = 80% (based on **2e**), colorless solid.  $^1\text{H}$  NMR (400 MHz,  $\text{CDCl}_3$ ):  $\delta$  7.75 (s, 2H), 7.34 (d,  $J = 5.1$  Hz, 1H), 7.31 (d,  $J = 3.6$  Hz, 1H), 7.11 (dd,  $J = 5.1, 3.6$  Hz, 1H), 0.41 (s, 18H);  $^{13}\text{C}$  NMR (101 MHz,  $\text{CDCl}_3$ ):  $\delta$  154.1, 142.7, 135.6, 135.6, 133.4, 128.2, 125.7, 124.1, 118.4 (q,  $J_{CF} = 320.1$  Hz), 0.3;  $^{19}\text{F}$  NMR (376 MHz,  $\text{CDCl}_3$ ):  $\delta$  -72.3. HRMS (EI+):  $m/z$  calcd for  $\text{C}_{17}\text{H}_{23}\text{O}_3\text{F}_3\text{Si}_2\text{S}_2$  452.0579; found 452.0571.

Methyl 4'-(((trifluoromethyl)sulfonyl)oxy)-3',5'-bis(trimethylsilyl)-[1,1'-biphenyl]-4-carboxylate (5d)

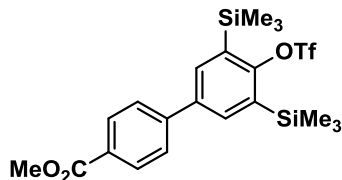

Boronate **2e**, coupling partner: Methyl-4-bromobenzoate (52 mg, 0.24 mmol). Column chromatography eluent: pentane/ $\text{Et}_2\text{O}$  (75 : 1),  $R_f = 0.2$ . Yield = 84% (based on **2e**), colorless solid.  $^1\text{H}$  NMR (400 MHz,  $\text{CDCl}_3$ ):  $\delta$  8.14 (d,  $J = 8.2$  Hz, 2H), 7.75 (s, 2H), 7.61 (d,  $J = 8.3$  Hz, 2H), 3.96 (s, 3H), 0.42 (s, 18H);  $^{13}\text{C}$  NMR (101 MHz,  $\text{CDCl}_3$ ):  $\delta$  166.8, 154.9, 144.4, 139.0, 137.0, 135.7, 130.2, 129.4, 127.3, 118.4 (q,  $J_{CF} = 320.1$  Hz), 52.2, 0.3;  $^{19}\text{F}$  NMR (376 MHz,  $\text{CDCl}_3$ ):  $\delta$  -72.3. HRMS (EI+):  $m/z$  calcd for  $\text{C}_{21}\text{H}_{27}\text{O}_5\text{F}_3\text{Si}_2\text{S}$  504.1070; found 504.1059.

5-(thiophen-2-yl)-3-(trimethylsilyl)pyridin-2-yl trifluoromethanesulfonate (5e)

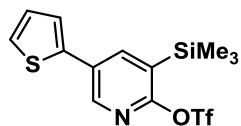

Boronate **2f**, coupling partner: 2-bromothiophene (39 mg, 0.24 mmol). Column chromatography eluent: pentane/ $\text{Et}_2\text{O}$  (100 : 1),  $R_f = 0.3$ . Yield = 60% (based on **2f**), colorless oil.  $^1\text{H}$  NMR (400 MHz,  $\text{CDCl}_3$ ):  $\delta$  8.53 (d,  $J = 2.6$  Hz, 1H), 8.02 (d,  $J = 2.6$  Hz, 1H), 7.40 (dd,  $J = 5.1, 1.0$  Hz, 1H), 7.33 (dd,  $J = 3.6, 1.0$  Hz, 1H), 7.14 (dd,  $J = 5.1, 3.7$  Hz, 1H), 0.41 (s, 9H);  $^{13}\text{C}$  NMR (101 MHz,  $\text{CDCl}_3$ ):  $\delta$  159.7, 145.5, 143.9, 138.7, 130.3, 128.4, 126.7, 125.4, 124.9, 118.4 (q,  $J_{CF} = 320.5$  Hz), -1.6;  $^{19}\text{F}$  NMR (376 MHz,  $\text{CDCl}_3$ ):  $\delta$  -72.7. HRMS (EI+):  $m/z$  calcd for  $\text{C}_{13}\text{H}_{14}\text{NO}_3\text{F}_3\text{Si}_2$  381.0137; found 381.0140.

## 5 Deprotection of B(pin) Boronates

### 5.1 General Procedure

Based on a modified literature procedure.<sup>[6]</sup> Diethanolamine (115  $\mu$ L, 1.2 mmol, 1.2 equiv.) was added at room temperature to a stirring solution of boronate **2** (1 mmol) in Et<sub>2</sub>O (10 mL) in a round-bottomed flask under air. The mixture was stirred vigorously for 18 h and the resulting colorless precipitate collected by filtration, washed with Et<sub>2</sub>O (2 x 5 mL) and dried with filter paper. The residue was resuspended in Et<sub>2</sub>O (20 mL) under air, treated with 0.5 M HCl<sub>(aq)</sub> (8 mL, 4 mmol, 4 equiv.) and stirred vigorously for 1 to 3 h (or until the reaction mixture became homogeneous). The solution was then diluted with Et<sub>2</sub>O (20 mL) and washed with brine (2 x 20 mL). The aqueous layer was extracted once more with Et<sub>2</sub>O (30 mL). The combined organic layers were dried (Na<sub>2</sub>SO<sub>4</sub>), filtered and concentrated under reduced pressure to afford the products as a colourless solid.

### 5.2 Data for Deprotected Boronates

#### (4-(((trifluoromethyl)sulfonyl)oxy)-3-(trimethylsilyl)phenyl)boronic acid (6a)

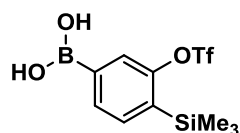

10 to 1 mixture of boronic acid and boroxine. Yield = 59% (based on **2a**), colorless solid. The regioisomer was identified by Si-H correlation NMR. See page S116. **Boronic acid:** <sup>1</sup>H NMR (400 MHz, CDCl<sub>3</sub>):  $\delta$  8.11 (d,  $J$  = 7.2 Hz, 1H), 8.09 (s, 1H), 7.72 (d,  $J$  = 7.2 Hz, 1H), 0.44 (s, 9H); <sup>13</sup>C NMR (101 MHz, CDCl<sub>3</sub>):  $\delta$  155.3, 138.6, 136.3, 134.1, 125.6, 118.5 (q,  $J_{CF}$  = 319.9 Hz), -0.9; <sup>19</sup>F NMR (376 MHz, CDCl<sub>3</sub>):  $\delta$  -74.1; <sup>11</sup>B NMR (128 MHz, CDCl<sub>3</sub>):  $\delta$  28.5. HRMS (CI+):  $m/z$  calcd for C<sub>10</sub>H<sub>15</sub>BO<sub>5</sub>F<sub>3</sub>SSi 343.0455; found 343.0461. **Boroxine:** <sup>1</sup>H NMR (400 MHz, CDCl<sub>3</sub>):  $\delta$  8.40 (s, 1H), 8.26 (d,  $J$  = 8.4 Hz, 1H), 7.52 (d,  $J$  = 8.4 Hz, 1H), 0.46 (s, 9H); <sup>19</sup>F NMR (376 MHz, CDCl<sub>3</sub>):  $\delta$  -74.1; <sup>11</sup>B NMR (128 MHz, CDCl<sub>3</sub>):  $\delta$  28.5.

#### (3-methyl-4-(((trifluoromethyl)sulfonyl)oxy)-5-(trimethylsilyl)phenyl)boronic acid (6b)

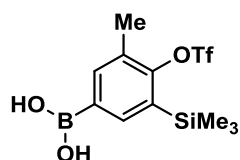

7 to 2 mixture of boronic acid and boroxine. Yield = 88% (based on **2b**), colorless solid. **Boronic acid:** <sup>1</sup>H NMR (400 MHz, CDCl<sub>3</sub>):  $\delta$  8.26 (s, 1H), 8.08 (s, 1H), 2.51 (s, 3H), 0.47 (s, 9H); <sup>13</sup>C NMR (101 MHz, CDCl<sub>3</sub>):  $\delta$  154.7, 142.3, 141.0, 134.5, 131.0, 118.6 (q,  $J_{CF}$  = 319.7 Hz), 17.4, 0.1; <sup>19</sup>F NMR (376 MHz, CDCl<sub>3</sub>):  $\delta$  -73.2; <sup>11</sup>B NMR (128 MHz, CDCl<sub>3</sub>):  $\delta$  29.0. HRMS (CI+):  $m/z$  calcd for C<sub>11</sub>H<sub>17</sub>BO<sub>5</sub>F<sub>3</sub>SSi 357.0611; found 357.0612. **Boroxine:** <sup>1</sup>H NMR (400 MHz, CDCl<sub>3</sub>):  $\delta$  7.75 (s, 1H), 7.66 (s, 1H), 2.4 (s, 3H), 0.40 (s, 9H); <sup>13</sup>C NMR (101 MHz, CDCl<sub>3</sub>):  $\delta$  153.4, 140.0, 139.2, 134.2, 130.7, 118.6 (q,  $J_{CF}$  = 319.7 Hz), 30.9, 0.1; <sup>19</sup>F NMR (376 MHz, CDCl<sub>3</sub>):  $\delta$  -73.3; <sup>11</sup>B NMR (128 MHz, CDCl<sub>3</sub>):  $\delta$  29.0.

#### (3-methoxy-5-(((trifluoromethyl)sulfonyl)oxy)-4-(trimethylsilyl)phenyl)boronic acid (6c)

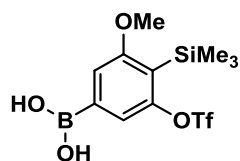

5 to 1 mixture of boronic acid and boroxine. Yield = 84% (based on **2c**), colorless solid. **Boronic acid:** <sup>1</sup>H NMR (400 MHz, CDCl<sub>3</sub>):  $\delta$  7.73 (s, 1H), 7.56 (s, 1H), 3.95 (s, 3H), 0.42 (s, 9H); <sup>13</sup>C NMR (101 MHz, CDCl<sub>3</sub>):  $\delta$  165.4, 154.8, 126.8, 119.1, 118.7 (q,  $J_{CF}$  = 320.7 Hz), 115.0, 55.4, 0.6; <sup>19</sup>F NMR (376 MHz, CDCl<sub>3</sub>):  $\delta$  -73.0; <sup>11</sup>B NMR (128 MHz, CDCl<sub>3</sub>):  $\delta$  28.6. HRMS (CI+):  $m/z$  calcd for C<sub>11</sub>H<sub>17</sub>BO<sub>6</sub>F<sub>3</sub>SSi 373.0560; found 373.0563. **Boroxine:** <sup>1</sup>H NMR (400 MHz, CDCl<sub>3</sub>):  $\delta$  7.24 (s, 1H), 7.19 (s, 1H), 3.87 (s, 3H), 0.37 (s, 9H); <sup>19</sup>F NMR (376 MHz, CDCl<sub>3</sub>):  $\delta$  -72.8; <sup>11</sup>B NMR (128 MHz, CDCl<sub>3</sub>):  $\delta$  28.6.

### (3-bromo-4-(((trifluoromethyl)sulfonyl)oxy)-5-(trimethylsilyl)phenyl)boronic acid (6d)

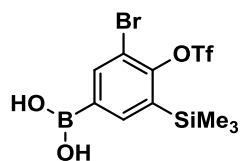

13 to 1 mixture of boronic acid and boroxine. Yield = 80% (based on **2d**), colorless solid. **Boronic acid**:  $^1\text{H NMR}$  (400 MHz,  $\text{CDCl}_3$ ):  $\delta$  8.42 (d,  $J = 1.6$  Hz, 1H), 8.32 (d,  $J = 1.6$  Hz, 1H), 0.50 (s, 9H);  $^{13}\text{C NMR}$  (101 MHz,  $\text{CDCl}_3$ ):  $\delta$  152.3, 143.2, 142.7, 137.8, 118.6 (q,  $J_{\text{CF}} = 321.0$  Hz), 116.9, 0.0;  $^{19}\text{F NMR}$  (376 MHz,  $\text{CDCl}_3$ ):  $\delta$  -71.4;  $^{11}\text{B NMR}$  (128 MHz,  $\text{CDCl}_3$ ):  $\delta$  28.3. HRMS (CI+):  $m/z$  calcd for  $\text{C}_{10}\text{H}_{14}\text{BO}_5\text{F}_3\text{SSiBr}$  420.9560; found 420.9555. **Boroxine**:  $^1\text{H NMR}$  (400 MHz,  $\text{CDCl}_3$ ):  $\delta$  8.04 (s, 1H), 7.86 (s, 1H), 0.42 (s, 9H);  $^{19}\text{F NMR}$  (376 MHz,  $\text{CDCl}_3$ ):  $\delta$  -71.6;  $^{11}\text{B NMR}$  (128 MHz,  $\text{CDCl}_3$ ):  $\delta$  28.3.

### (4-(((trifluoromethyl)sulfonyl)oxy)-3,5-bis(trimethylsilyl)phenyl)boronic acid (6e)

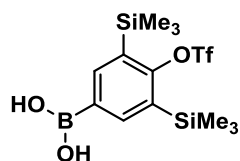

6 to 1 mixture of boronic acid and boroxine. Yield = 53% (based on **2e**), colorless solid. **Boronic acid**:  $^1\text{H NMR}$  (400 MHz,  $\text{CDCl}_3$ ):  $\delta$  8.44 (s, 2H), 0.46 (s, 18H);  $^{13}\text{C NMR}$  (101 MHz,  $\text{CDCl}_3$ ):  $\delta$  158.6, 145.8, 134.6, 118.4 (q,  $J_{\text{CF}} = 320.2$  Hz), 0.3;  $^{19}\text{F NMR}$  (376 MHz,  $\text{CDCl}_3$ ):  $\delta$  -72.3;  $^{11}\text{B NMR}$  (128 MHz,  $\text{CDCl}_3$ ):  $\delta$  28.2. HRMS (CI+):  $m/z$  calcd for  $\text{C}_{13}\text{H}_{23}\text{BO}_5\text{F}_3\text{SSi}_2$  415.0850; found 415.0844. **Boroxine**:  $^1\text{H NMR}$  (400 MHz,  $\text{CDCl}_3$ ):  $\delta$  8.42 (s, 2H), 0.46 (s, 18H, partially obscured by boronic acid);  $^{19}\text{F NMR}$  (376 MHz,  $\text{CDCl}_3$ ):  $\delta$  -72.3;  $^{11}\text{B NMR}$  (128 MHz,  $\text{CDCl}_3$ ):  $\delta$  28.2.

### (6-(((trifluoromethyl)sulfonyl)oxy)-5-(trimethylsilyl)pyridin-3-yl)boronic acid (6f)

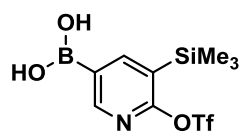

10 to 1 mixture of boronic acid and boroxine. Yield = 85% (based on **2f**), colorless solid. **Boronic acid**:  $^1\text{H NMR}$  (400 MHz,  $\text{CDCl}_3$ ):  $\delta$  9.02 (s, 1H), 8.61 (s, 1H), 0.44 (s, 9H);  $^{13}\text{C NMR}$  (101 MHz,  $\text{CDCl}_3$ ):  $\delta$  163.9, 156.2, 154.1, 124.7, 118.4 (q,  $J_{\text{CF}} = 320.5$  Hz), -1.7;  $^{19}\text{F NMR}$  (376 MHz,  $\text{CDCl}_3$ ):  $\delta$  -73.0;  $^{11}\text{B NMR}$  (128 MHz,  $\text{CDCl}_3$ ):  $\delta$  28.7. HRMS: Product degrades. **Boroxine**:  $^1\text{H NMR}$  (400 MHz,  $\text{CDCl}_3$ ):  $\delta$  8.60 (s, 1H, partially obscured by boronic acid), 8.26 (d,  $J_{\text{CF}} = 1$  Hz, 1H), 0.43 (s, 9H);  $^{19}\text{F NMR}$  (376 MHz,  $\text{CDCl}_3$ ):  $\delta$  -73.0;  $^{11}\text{B NMR}$  (128 MHz,  $\text{CDCl}_3$ ):  $\delta$  28.7.

## 6 Derivatization of Boronic Acids

### 6.1 Tsuji-Trost Coupling

#### Methyl-4-(3-methoxy-5-(((trifluoromethyl)sulfonyl)oxy)-4-(trimethylsilyl)phenyl)but-2-enoate (7a)

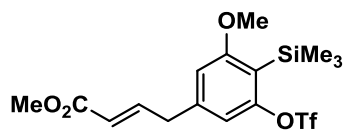

A 6 mL glass flask equipped with a Teflon cap and magnetic stirrer was charged with boronic acid **6c** (74 mg, 0.2 mmol, 1.2 equiv.),  $\text{Pd}(\text{OAc})_2$  (1 mg, 0.005 mmol, 2.5 mol%) and  $\text{KF}$  (46 mg, 0.8 mmol, 4 equiv.). The flask was evacuated and backfilled with argon. 1,4-dioxane (1 mL) was added then methyl-4-bromocrotonate (43 mg, 0.24 mmol, 1.2 equiv.). The resulting suspension was stirred for 18 h at 20 °C. The reaction mixture was diluted with  $\text{Et}_2\text{O}$  (20 mL) and washed with brine ( $2 \times 15$  mL), dried ( $\text{Na}_2\text{SO}_4$ ), concentrated under reduced pressure and purified by silica gel flash chromatography; eluent system: pentane/ $\text{Et}_2\text{O}$  (8 : 1).  $R_f = 0.2$ . Yield = 65% (based on **6c**), colorless oil.  $^1\text{H NMR}$  (400 MHz,  $\text{CDCl}_3$ ):  $\delta$  7.04 (dt,  $J = 15.6, 6.7$  Hz, 1H), 6.75 (s, 1H), 6.62 (s, 1H), 5.84 (dt,  $J = 15.6, 1.4$  Hz, 1H), 3.81 (s, 3H), 3.73 (s, 3H), 3.52 (dd,  $J = 6.7, 1.4$  Hz, 2H), 0.35 (s, 9H);  $^{13}\text{C NMR}$  (101 MHz,  $\text{CDCl}_3$ ):  $\delta$  166.5, 165.7, 154.7, 145.7, 142.1, 122.7, 119.1, 118.6 (q,  $J_{\text{CF}} = 320.8$  Hz), 113.2 (q,  $J_{\text{CF}} = 1.4$  Hz), 110.0, 55.6, 51.6, 38.2, 0.7;  $^{19}\text{F}$

NMR (376 MHz, CDCl<sub>3</sub>):  $\delta$  -72.8. HRMS (EI+):  $m/z$  calcd for C<sub>16</sub>H<sub>21</sub>O<sub>6</sub>F<sub>3</sub>SiS 426.0780; found 426.0794.

## 6.2 Trifluoroboronate Potassium Salt

### 3-methoxy-5-(trifluoroboranyl)-2-(trimethylsilyl)phenyl trifluoromethanesulfonate potassium salt (7b)

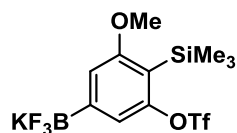

Synthesis based on a literature procedure.<sup>[7]</sup> Boronic acid **6c** (186 mg, 0.5 mmol). Yield = 99% (based on **6c**), colorless solid. <sup>1</sup>H NMR (400 MHz, CD<sub>3</sub>CN):  $\delta$  7.07 (s, 1H), 6.95 (s, 1H), 3.83 (s, 3H), 0.33 (s, 10H); <sup>13</sup>C NMR (101 MHz, CD<sub>3</sub>CN):  $\delta$  165.8, 155.4, 119.6 (q,  $J_{CF}$  = 319.8 Hz), 117.1, 116.0 – 115.9 (m), 113.8 (q,  $J_{CF}$  = 1.6 Hz), 77.4, 56.1, 1.1; <sup>19</sup>F NMR (376 MHz, CD<sub>3</sub>CN):  $\delta$  -73.8, -143.5 (m); <sup>11</sup>B NMR (128 MHz, CD<sub>3</sub>CN):  $\delta$  2.64 (q,  $J$  = 39.7 Hz). HRMS (ESI+):  $m/z$  calcd for C<sub>11</sub>H<sub>14</sub>BF<sub>6</sub>O<sub>4</sub>SSi 395.0387; found 395.0377.

## 6.3 Rh-Catalyzed Conjugate Addition

A 6 mL glass flask equipped with a Teflon cap and magnetic stirrer was charged with the appropriate boronic acid (0.2 mmol, 1.2 equiv.), chalcone (42 mg, 0.2 mmol, 1 equiv.), [RhCl(COD)]<sub>2</sub> (3 mg, 0.006 mmol, 3 mol%) and NaHCO<sub>3</sub> (3.4 mg, 0.04 mmol, 0.2 equiv.). The flask was evacuated and backfilled with argon. 1,4-dioxane (2 mL) and H<sub>2</sub>O (0.4 mL) were added and the resulting suspension was stirred for 24 h at 50 °C. The crude mixture was purified by silica gel flash chromatography using the indicated eluent system.

### 4-(3-oxo-1,3-diphenylpropyl)-2,6-bis(trimethylsilyl)phenyl trifluoromethanesulfonate (7c)

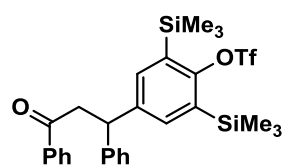

Boronic acid **6e** (99 mg). Column chromatography eluent: pentane/Et<sub>2</sub>O (50 : 1),  $R_f$  = 0.2. Yield = 86% (based on **6e**), yellow oil. <sup>1</sup>H NMR (400 MHz, CDCl<sub>3</sub>):  $\delta$  7.98 – 7.89 (m, 2H), 7.63 – 7.53 (m, 1H), 7.45 (t,  $J$  = 7.6 Hz, 2H), 7.39 (s, 2H), 7.35 – 7.29 (m, 2H), 7.28 – 7.19 (m, 3H), 4.87 (t,  $J$  = 7.3 Hz, 1H), 3.73 (dd,  $J$  = 16.9, 7.3 Hz, 1H), 3.69 (dd,  $J$  = 16.9, 7.3 Hz, 1H), 0.28 (s, 18H); <sup>13</sup>C NMR (101 MHz, CDCl<sub>3</sub>):  $\delta$  197.8, 153.4, 143.2, 142.8, 137.7, 136.9, 134.8, 133.2, 128.7, 128.6, 128.0, 127.7, 126.7, 118.4 (q,  $J_{CF}$  = 320.0 Hz), 45.4, 44.7, 0.2; <sup>19</sup>F NMR (376 MHz, CDCl<sub>3</sub>):  $\delta$  -72.5. HRMS (EI+):  $m/z$  calcd for C<sub>28</sub>H<sub>33</sub>O<sub>4</sub>F<sub>3</sub>Si<sub>2</sub>S 578.1590; found 578.1586.

### 2-bromo-4-(3-oxo-1,3-diphenylpropyl)-6-(trimethylsilyl)phenyl trifluoromethanesulfonate (7d)

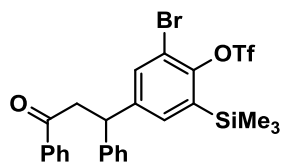

Boronic acid **6b** (101 mg). Column chromatography eluent: pentane/Et<sub>2</sub>O (40 : 1),  $R_f$  = 0.2. Yield = 93% (based on **6b**), yellow oil. <sup>1</sup>H NMR (400 MHz, CDCl<sub>3</sub>):  $\delta$  7.96 – 7.89 (m, 2H), 7.59 – 7.53 (m, 1H), 7.51 (d,  $J$  = 2.3 Hz, 1H), 7.49 – 7.42 (m, 2H), 7.35 (d,  $J$  = 2.3 Hz, 1H), 7.34 – 7.28 (m, 2H), 7.26 – 7.22 (m, 3H), 4.83 (t,  $J$  = 7.2 Hz, 1H), 3.73 (dd,  $J$  = 17.3, 7.2 Hz, 1H), 3.67 (dd,  $J$  = 17.3, 7.2 Hz, 1H), 0.32 (s, 9H); <sup>13</sup>C NMR (101 MHz, CDCl<sub>3</sub>):  $\delta$  197.2, 147.2, 145.5, 142.5, 137.4, 136.7, 135.2, 135.0, 133.4, 128.9, 128.7, 128.0, 127.7, 127.0, 118.5 (q,  $J_{CF}$  = 320.8 Hz), 116.5, 45.0, 44.5, -0.1; <sup>19</sup>F NMR (376 MHz, CDCl<sub>3</sub>):  $\delta$  -71.8. HRMS (EI+):  $m/z$  calcd for C<sub>25</sub>H<sub>24</sub>O<sub>4</sub>BrSSiF<sub>3</sub> 584.0300; found 584.0309.

## 6.4 Iodonium Suzuki Coupling

A 6 mL glass flask equipped with a Teflon cap and magnetic stirrer was charged with the appropriate boronic acid (0.2 mmol, 1 equiv.), iodonium salt (0.2 mmol, 1 equiv.), Pd(OAc)<sub>2</sub> (1 mg, 0.004 mmol,

2 mol%) and Na<sub>2</sub>CO<sub>3</sub> (25 mg, 0.24 mmol, 0.2 equiv.). The flask was evacuated and backfilled with argon. Diglyme (0.8 mL) and H<sub>2</sub>O (0.2 ml) were added and the resulting suspension was stirred for 20 h at 20 °C. The reaction mixture was diluted with Et<sub>2</sub>O (20 mL) and washed with a saturated solution of NH<sub>4</sub>Cl (2 × 15 mL), dried (Na<sub>2</sub>SO<sub>4</sub>), concentrated under reduced pressure and purified by silica gel flash chromatography using the indicated eluent system.

#### 4'-bromo-3-methyl-5-(trimethylsilyl)-[1,1'-biphenyl]-4-yl trifluoromethanesulfonate (7e)

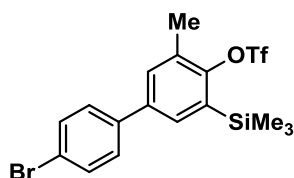

Boronic acid **6b** (71 mg), bis(4-bromophenyl)iodonium triflate (118 mg). Column chromatography eluent: pentane/Et<sub>2</sub>O (40 : 1), R<sub>f</sub> = 0.2. Yield = 67% (based on **6b**), colorless solid. <sup>1</sup>H NMR (400 MHz, CDCl<sub>3</sub>): δ 7.62 – 7.55 (m, 2H), 7.54 – 7.51 (dd, *J* = 2.4, 0.5 Hz, 1H), 7.45 (dd, *J* = 2.4, 0.5 Hz, 1H), 7.44 – 7.38 (m, 2H), 2.46 (s, 3H), 0.44 (s, 9H); <sup>13</sup>C NMR (101 MHz, CDCl<sub>3</sub>): δ 150.7, 139.7, 138.7, 135.5, 132.9, 132.2, 132.0, 131.8, 128.8, 122.2, 118.6 (q, *J*<sub>CF</sub> = 319.8 Hz), 17.4 (q, *J*<sub>CF</sub> = 1.4 Hz), 0.1; <sup>19</sup>F NMR (376 MHz, CDCl<sub>3</sub>): δ -73.3. HRMS (EI+): *m/z* calcd for C<sub>17</sub>H<sub>18</sub>O<sub>3</sub>F<sub>3</sub>BrSSi 465.9881; found 465.9873.

#### 3-bromo-5-(trimethylsilyl)-[1,1'-biphenyl]-4-yl trifluoromethanesulfonate (7f)

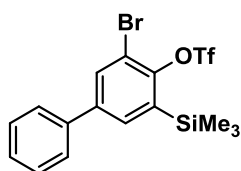

Boronic acid **6d** (84 mg), diphenyliodonium *para*-toluenesulfonate (90 mg). Column chromatography eluent: pentane. R<sub>f</sub> = 0.4. Yield = 87% (based on **6d**), colorless solid. <sup>1</sup>H NMR (400 MHz, CDCl<sub>3</sub>): δ 7.86 (d, *J* = 2.3 Hz, 1H), 7.65 (d, *J* = 2.3 Hz, 1H), 7.55 – 7.51 (m, 2H), 7.50 – 7.44 (m, 2H), 7.44 – 7.39 (m, 1H), 0.44 (s, 9H); <sup>13</sup>C NMR (101 MHz, CDCl<sub>3</sub>): δ 148.0, 142.3, 138.4, 137.8, 134.2, 129.0, 128.4, 127.2, 118.6 (q, *J*<sub>CF</sub> = 321.0 Hz), 116.7, 0.1; <sup>19</sup>F NMR (376 MHz, CDCl<sub>3</sub>): δ -71.6. HRMS (EI+): *m/z* calcd for C<sub>16</sub>H<sub>16</sub>O<sub>3</sub>F<sub>3</sub>SiSBr 451.9725; found 451.9727.

## 6.5 Iodination

#### 5-iodo-3-(trimethylsilyl)pyridin-2-yl trifluoromethanesulfonate (7g)

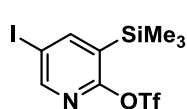

A 6 mL glass flask equipped with a Teflon cap and magnetic stirrer was charged with boronic acid **6f** (69 mg, 0.2 mmol, 1 equiv.), *N*-iodosuccinimide (135 mg, 0.6 mmol, 3 equiv.), CuI (4 mg, 0.02 mmol, 10 mol%), 1,10-phenanthroline (7 mg, 0.02 mmol, 10 mol%) and K<sub>2</sub>CO<sub>3</sub> (56 mg, 0.4 mmol, 2 equiv.). The flask was evacuated and backfilled with argon. Diglyme (1 mL) was added and the resulting suspension was stirred for 16 h at 40 °C. The reaction mixture was diluted with Et<sub>2</sub>O (20 mL) and washed with a 1 to 1 solution of saturated aqueous NH<sub>4</sub>Cl and saturated aqueous Na<sub>2</sub>SO<sub>3</sub> (15 mL) then wash with brine (10 mL), dried (Na<sub>2</sub>SO<sub>4</sub>), concentrated under reduced pressure and purified by silica gel flash chromatography; eluent system: pentane/Et<sub>2</sub>O (50 : 1). R<sub>f</sub> = 0.5. Yield = 93% (based on **6f**), pale yellow oil. <sup>1</sup>H NMR (400 MHz, CDCl<sub>3</sub>): δ 8.51 (d, *J* = 2.4 Hz, 1H), 8.12 (d, *J* = 2.4 Hz, 1H), 0.37 (s, 9H); <sup>13</sup>C NMR (101 MHz, CDCl<sub>3</sub>): δ 160.0, 154.5, 154.5, 128.7, 118.4 (q, *J*<sub>CF</sub> = 321.0 Hz), 92.0, -1.7; <sup>19</sup>F NMR (376 MHz, CDCl<sub>3</sub>): δ -72.6. HRMS (EI+): *m/z* calcd for C<sub>9</sub>H<sub>11</sub>NO<sub>3</sub>F<sub>3</sub>SiI 424.9226; found 424.9220.

Note: For the identical reaction run without CuI, the conversion after 16 h is 70 %.

## 6.6 Chan-Lam Coupling

A 6 mL glass flask equipped with a rubber septum and magnetic stirrer was charged with the appropriate boronate (1.2 equiv.), Cu(OAc)<sub>2</sub>·H<sub>2</sub>O (0.1 equiv.) and pre-dried 4Å molecular sieves (375 mg/mmol). The flask was evacuated and backfilled with O<sub>2</sub>. CH<sub>2</sub>Cl<sub>2</sub> (1 mL) was added and the resulting suspension was stirred for 5 min at 20 °C. Morpholine (1 equiv.) was then added and the



mixture was stirred for 20 h at 40 °C. The crude mixture was purified by silica gel flash chromatography using the indicated eluent system.

2-methyl-4-morpholino-6-(trimethylsilyl)phenyl trifluoromethanesulfonate (7h)

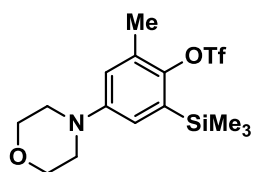

Boronic acid **6b** (71 mg, 0.2 mmol), copper (3.2 mg, 0.016 mmol), 4Å MS (75mg), morpholine (14.3 mg, 0.16 mmol). Column chromatography eluent: petroleum ether/EtOAc (10 : 1),  $R_f = 0.4$ . Yield = 93% (based on morpholine), colorless solid.  $^1\text{H NMR}$  (400 MHz,  $\text{CDCl}_3$ ):  $\delta$  6.86 (d,  $J = 2.9$  Hz, 1H), 6.76 (d,  $J = 2.9$  Hz, 1H), 3.94 – 3.80 (m, 4H), 3.22 – 3.10 (m, 4H), 2.34 (s, 3H), 0.37 (s, 9H);  $^{13}\text{C NMR}$  (101 MHz,  $\text{CDCl}_3$ ):  $\delta$  150.0, 144.1, 135.1, 131.9, 120.7, 119.9, 118.6 (q,  $J_{CF} = 319.8$  Hz), 66.7, 49.1, 17.7 (q,  $J_{CF} = 1.4$  Hz), 0.1;  $^{19}\text{F NMR}$  (376 MHz,  $\text{CDCl}_3$ ):  $\delta$  -73.5. HRMS (CI+):  $m/z$  calcd for  $\text{C}_{15}\text{H}_{23}\text{NO}_4\text{SSiF}_3$  398.1069; found 398.1070.

2-bromo-4-morpholino-6-(trimethylsilyl)phenyl trifluoromethanesulfonate (7i)

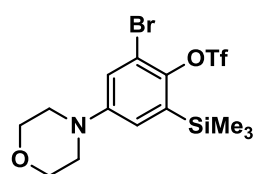

Boronic acid **6d** (71 mg, 0.24 mmol), copper (3.2 mg, 0.02 mmol), 4Å MS (75mg), morpholine (14.3 mg, 0.2 mmol). Column chromatography eluent: pentane/Et<sub>2</sub>O (9 : 1),  $R_f = 0.2$ . Yield = 72% (based on morpholine), colorless solid.  $^1\text{H NMR}$  (400 MHz,  $\text{CDCl}_3$ ):  $\delta$  7.11 (s, 1H), 6.92 (s, 1H), 3.85 (s, 4H), 3.17 (s, 4H), 0.39 (s, 9H);  $^{13}\text{C NMR}$  (101 MHz,  $\text{CDCl}_3$ ):  $\delta$  150.7, 141.3, 137.3, 121.4, 121.2, 118.5 (q,  $J_{CF} = 320.4$  Hz), 117.0, 66.6, 48.5, 0.1;  $^{19}\text{F NMR}$  (376 MHz,  $\text{CDCl}_3$ ):  $\delta$  -71.8. HRMS (EI+):  $m/z$  calcd for  $\text{C}_{14}\text{H}_{19}\text{NO}_4\text{F}_3\text{SiSBr}$  460.9940; found 460.9956.

## 7 Crystallographic Data

| Crystal data                      | Compound <b>4m</b>                                                                                                                               | Compound <b>4h</b>                                                                                                                               |
|-----------------------------------|--------------------------------------------------------------------------------------------------------------------------------------------------|--------------------------------------------------------------------------------------------------------------------------------------------------|
| CCDC-No.                          | -                                                                                                                                                | -                                                                                                                                                |
| Empirical formula                 | C <sub>23</sub> H <sub>29</sub> BBrNO <sub>3</sub>                                                                                               | C <sub>17</sub> H <sub>19</sub> BBrNO <sub>3</sub> , CHCl <sub>3</sub>                                                                           |
| Formula weight                    | 458.19                                                                                                                                           | 495.42                                                                                                                                           |
| Crystal description               | Colorless block                                                                                                                                  | Colorless block                                                                                                                                  |
| Crystal size                      | 0.35 x 0.22 x 0.21                                                                                                                               | 0.45 x 0.23 x 0.2                                                                                                                                |
| Crystal system, space group       | Triclinic P <sub>1</sub>                                                                                                                         | Orthorhombic, P b c a                                                                                                                            |
| Unit cell dimensions:             |                                                                                                                                                  |                                                                                                                                                  |
| a                                 | 5.9629(3)                                                                                                                                        | 13.0653(7)                                                                                                                                       |
| b                                 | 9.6761(5)                                                                                                                                        | 11.0099(6)                                                                                                                                       |
| c                                 | 9.6943(5)                                                                                                                                        | 29.9093(17)                                                                                                                                      |
| α                                 | 83.833(3)                                                                                                                                        | 90                                                                                                                                               |
| β                                 | 82.215(3)                                                                                                                                        | 90                                                                                                                                               |
| γ                                 | 89.828(3)                                                                                                                                        | 90                                                                                                                                               |
| Volume                            | 550.94(5)                                                                                                                                        | 4302.4(4)                                                                                                                                        |
| Z                                 | 1                                                                                                                                                | 8                                                                                                                                                |
| Calculated density                | 1.381 Mg/m <sup>3</sup>                                                                                                                          | 1.530 Mg/m <sup>3</sup>                                                                                                                          |
| F(000)                            | 238                                                                                                                                              | 2000                                                                                                                                             |
| Linear absorption coefficient μ   | 1.889 mm <sup>-1</sup>                                                                                                                           | 2.301 mm <sup>-1</sup>                                                                                                                           |
| Absorption correction             | multi-scan, SADABS 2008                                                                                                                          | multi-scan, SADABS 2008                                                                                                                          |
| Max. and min. transmission        | 0.6257 and 0.7455                                                                                                                                | 0.5929 and 0.7455                                                                                                                                |
| Unit cell determination           | 2.1 < Θ < 27.4°<br>4282 reflections used at 100K                                                                                                 | 1.4 < Θ < 27.2°<br>3607 reflections used at 100K                                                                                                 |
| Data collection                   | -                                                                                                                                                | -                                                                                                                                                |
| Temperature                       | 100(2)K                                                                                                                                          | 100(2)K                                                                                                                                          |
| Diffractometer                    | Bruker APEX-II CCD                                                                                                                               | Bruker APEX-II CCD                                                                                                                               |
| Radiation source                  | fine-focus sealed tube                                                                                                                           | fine-focus sealed tube                                                                                                                           |
| Radiation and wavelength          | MoK <sub>α</sub> , 0.71073 Å                                                                                                                     | MoK <sub>α</sub> , 0.71073 Å                                                                                                                     |
| Monochromator                     | Graphite                                                                                                                                         | Graphite                                                                                                                                         |
| Scan type                         | ω scans                                                                                                                                          | ω scans                                                                                                                                          |
| Θ range for data collection       | 2.1 < Θ < 27.4°                                                                                                                                  | 1.4 < Θ < 27.2°                                                                                                                                  |
| Index ranges                      | -7 ≤ h ≤ 7, -12 ≤ k ≤ 12, -12 ≤ l ≤ 12                                                                                                           | -16 ≤ h ≤ 16, -14 ≤ k ≤ 11, -29 ≤ l ≤ 38                                                                                                         |
| Reflections collected / unique    | 8642/ 4395                                                                                                                                       | 34995/ 4781                                                                                                                                      |
| Significant unique reflections    | 4282 with I > 2σ(I)                                                                                                                              | 3607 with I > 2σ(I)                                                                                                                              |
| R(int), R(sigma)                  | 0.0294, 0.0479                                                                                                                                   | 0.0429, 0.0583                                                                                                                                   |
| Completeness to Θ <sub>max</sub>  | 99.7%                                                                                                                                            | 99.3%                                                                                                                                            |
| Refinement                        | -                                                                                                                                                | -                                                                                                                                                |
| Refinement method                 | Full-matrix least-squares on F <sup>2</sup>                                                                                                      | Full-matrix least-squares on F <sup>2</sup>                                                                                                      |
| Data / parameters / restraints    | 4395/ 270/ 3                                                                                                                                     | 4781/ 249/ 0                                                                                                                                     |
| Goodness-of-fit on F <sup>2</sup> | 1.015                                                                                                                                            | 1.015                                                                                                                                            |
| Final R indices [I > 2σ(I)]       | R1 = 0.0299, wR2 = 0.0623                                                                                                                        | R1 = 0.0327, wR2 = 0.0653                                                                                                                        |
| R indices (all data)              | R1 = 0.0313, wR2 = 0.0618                                                                                                                        | R1 = 0.0557, wR2 = 0.0719                                                                                                                        |
| Weighting scheme                  | w=1/[σ <sup>2</sup> (F <sub>o</sub> <sup>2</sup> )+(aP) <sup>2</sup> ] where<br>P=(F <sub>o</sub> <sup>2</sup> +2F <sub>c</sub> <sup>2</sup> )/3 | w=1/[σ <sup>2</sup> (F <sub>o</sub> <sup>2</sup> )+(aP) <sup>2</sup> +bP] where P=(F <sub>o</sub> <sup>2</sup> +2F <sub>c</sub> <sup>2</sup> )/3 |
| Weighting scheme parameters       | 0.0302                                                                                                                                           | a = 0.0291, b = 2.1499                                                                                                                           |
| a                                 |                                                                                                                                                  |                                                                                                                                                  |
| Largest Δ/σ in last cycle         | 0.000                                                                                                                                            | 0.001                                                                                                                                            |
| Largest difference peak and hole  | 0.527 and -0.248 e/Å <sup>3</sup>                                                                                                                | 0.468 and -0.411 e/Å <sup>3</sup>                                                                                                                |
| Structure Solution Program        | SHELXS-2014 (Sheldrick, 2008)                                                                                                                    | SHELXS-2014 (Sheldrick, 2008)                                                                                                                    |
| Structure Refinement Program      | SHELXL-2014 (Sheldrick, 2008)                                                                                                                    | SHELXL-2014 (Sheldrick, 2008)                                                                                                                    |

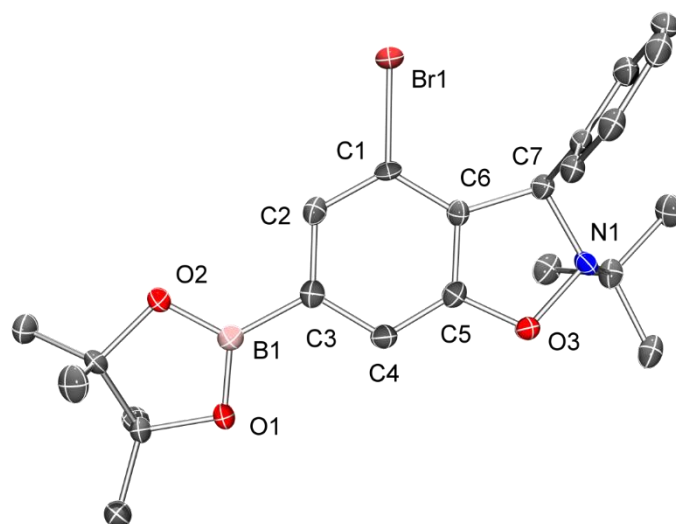

Figure S1. ORTEP drawing of **4m** at 50% probability levels. Hydrogen atoms are omitted for clarity. **4m** was refined as an inversion twin with a BASF of 0.53.

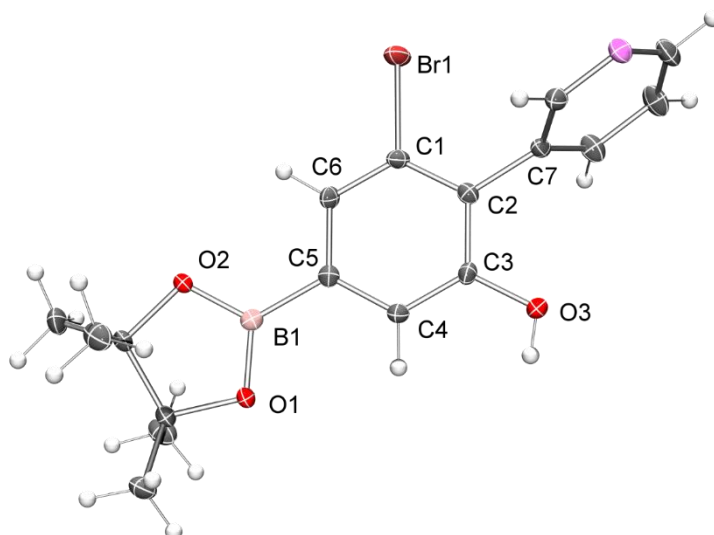

Figure S2. ORTEP drawing of **4h** at 50% probability levels. The chloroform solvate is omitted for clarity.

## 8 References

- [1] G. Sheldrick, *Acta Crystallogr., Sect. A: Found. Crystallogr.* **2008**, *A64*, 112-122.
- [2] D. Peña, A. Cobas, D. Pérez, E. Guitián, *Synthesis* **2002**, *2002*, 1454-1458.
- [3] T. Ikawa, T. Nishiyama, T. Shigeta, S. Mohri, S. Morita, S.-i. Takayanagi, Y. Terauchi, Y. Morikawa, A. Takagi, Y. Ishikawa, S. Fujii, Y. Kita, S. Akai, *Angew. Chem. Int. Ed.* **2011**, *50*, 5674-5677.
- [4] V. Matoušek, E. Pietrasiak, L. Sigrist, B. Czarniecki, A. Togni, *Eur. J. Org. Chem.* **2014**, *2014*, 3087-3092.
- [5] F. I. Carroll, T. P. Robinson, L. E. Brieady, R. N. Atkinson, S. W. Mascarella, M. I. Damaj, B. R. Martin, H. A. Navarro, *J. Med. Chem.* **2007**, *50*, 6383-6391.
- [6] J. Sun, M. T. Perfetti, W. L. Santos, *J. Org. Chem.* **2011**, *76*, 3571-3575.
- [7] A. J. J. Lennox, G. C. Lloyd-Jones, *Angew. Chem. Int. Ed.* **2012**, *51*, 9385-9388.

# 9 Copies of Spectra

7.95  
7.88  
7.88  
7.86  
7.86  
7.74  
7.73  
7.69  
7.53  
7.52  
7.34  
7.32

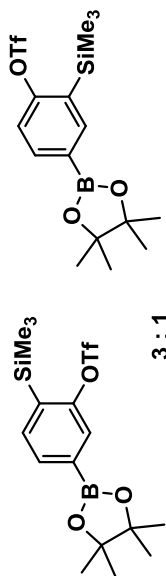

3 : 1  
2a' : 2a''

ss // /

1.34  
1.34  
0.38  
0.37

1.00  
1.00  
2.31  
2.26  
2.53  
1.14

13.00  
31.61  
9.95  
21.85

61S

10.5 10.0 9.5 9.0 8.5 8.0 7.5 7.0 6.5 6.0 5.5 5.0 4.5 4.0 3.5 3.0 2.5 2.0 1.5 1.0 0.5 0.0 -0.5

f1 (ppm)

157.36  
154.91

142.89  
137.95  
135.89  
135.66  
133.46  
131.40  
125.04  
125.03  
123.23  
120.05  
118.47  
118.45  
116.87  
116.86  
113.69  
113.67  
84.27  
84.15

24.81  
24.79

-0.80  
-0.88

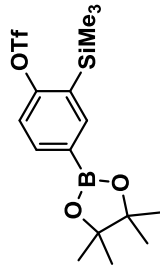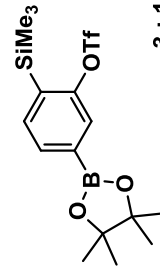

3 : 1

2a' : 2a''

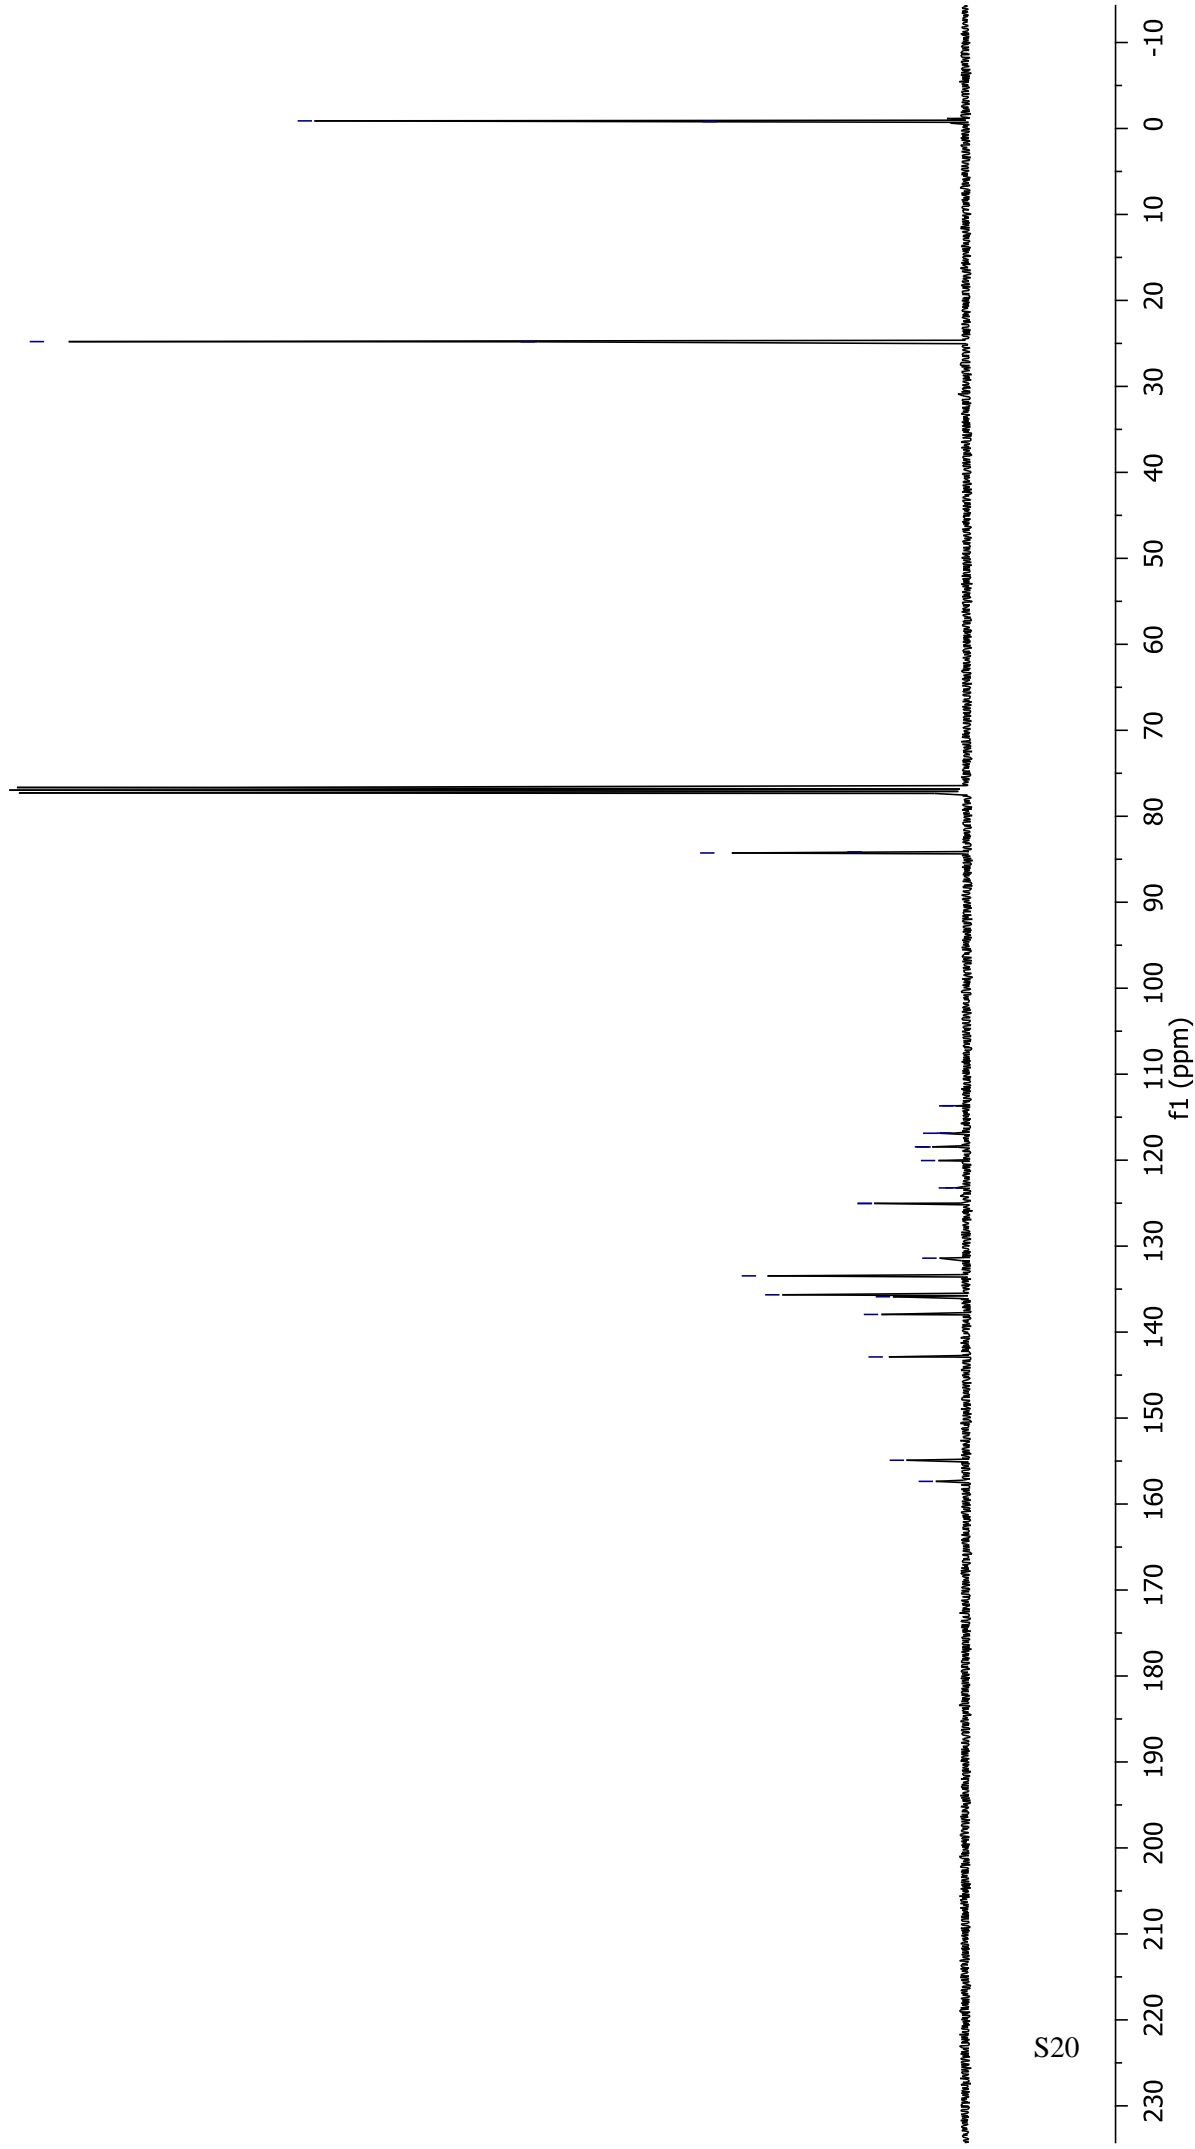

-73.89  
-73.94

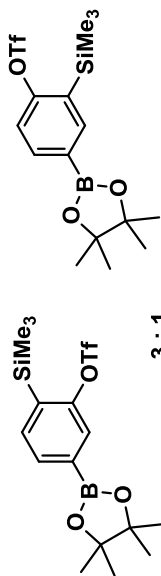

3 : 1

2a' : 2a''

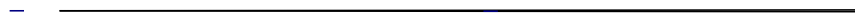

S21

30 20 10 0 -10 -20 -30 -40 -50 -60 -70 -80 -90 -100 -110 -120 -130 -140 -150 -160 -170 -180 -190 -200  
f1 (ppm)

— 30.46

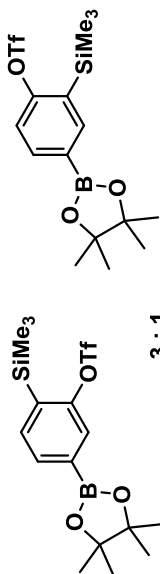

3 : 1

2a' : 2a''

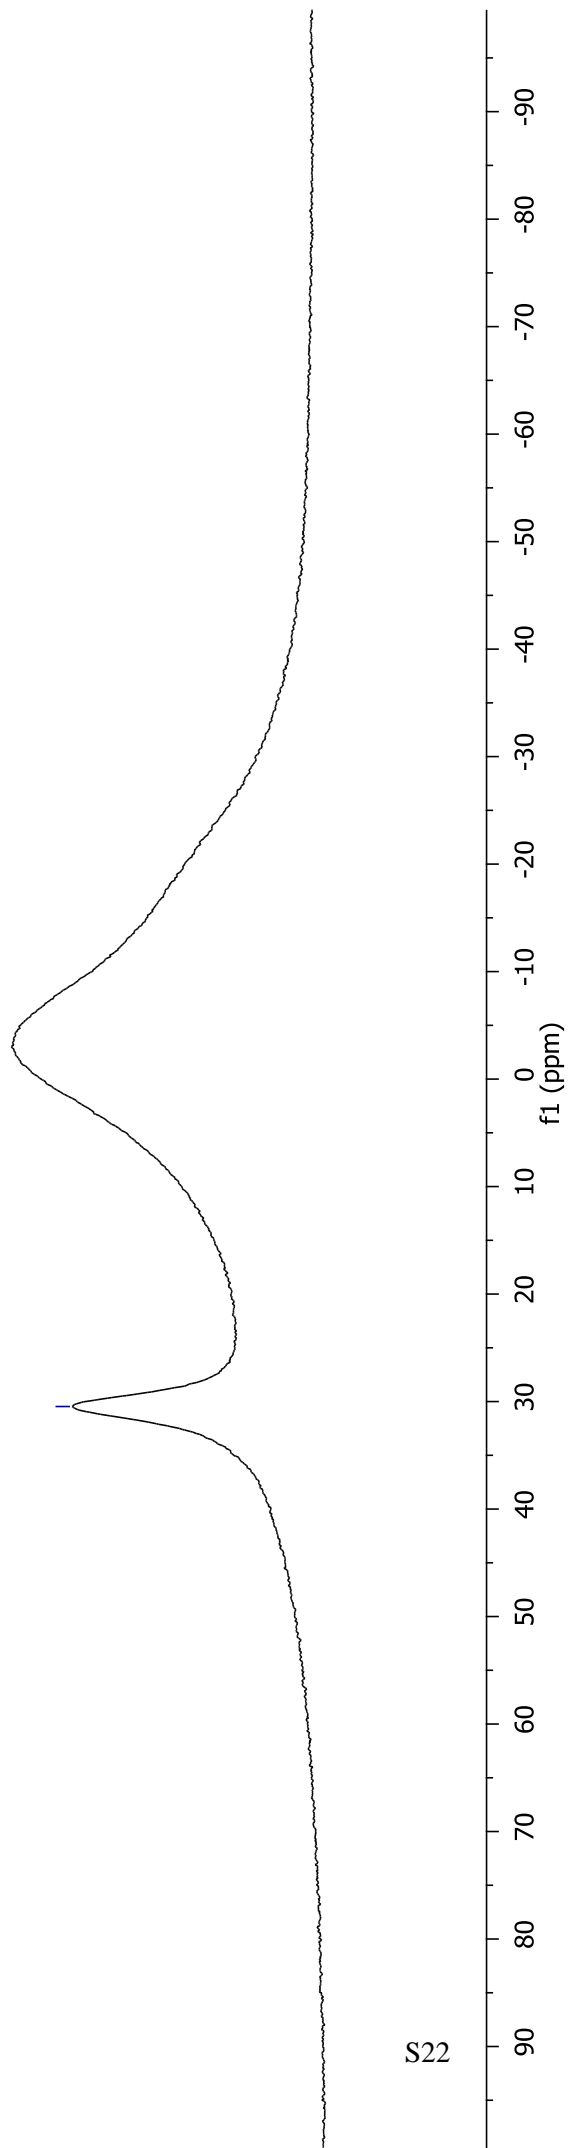

S22

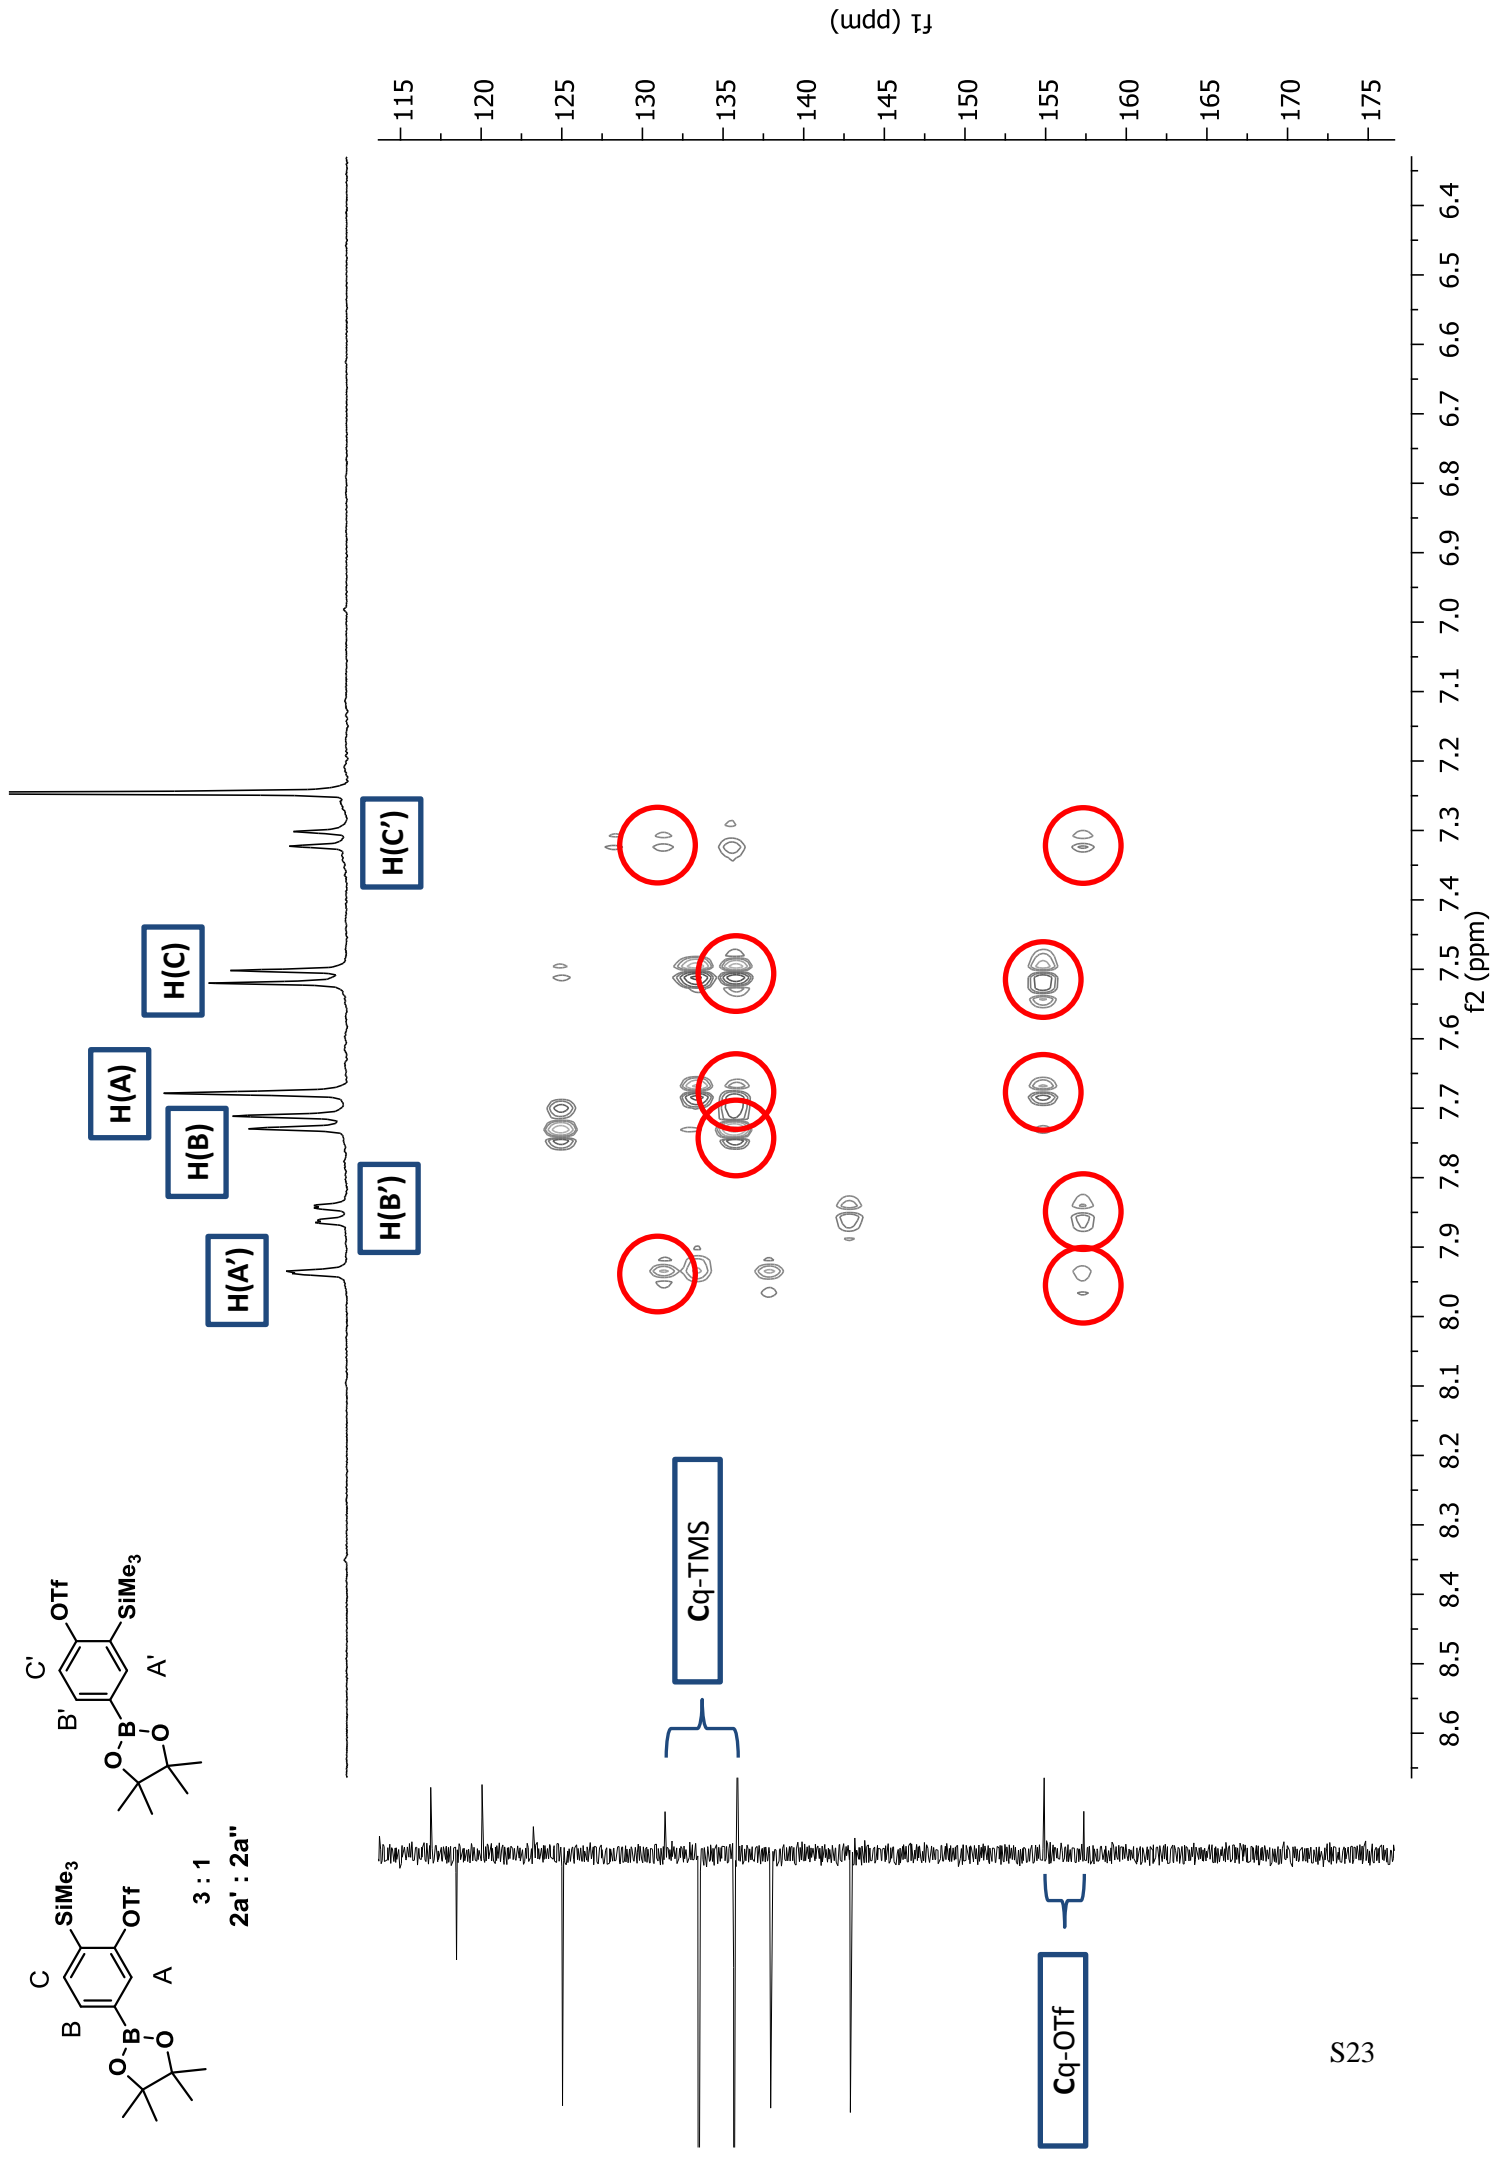



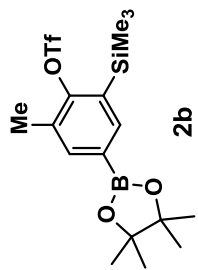

7.83  
7.75

2.39

1.35

0.40

S24

0.93  
0.94

3.00

12.77

8.99

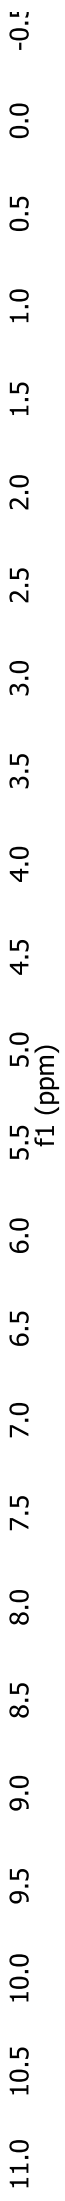



— 153.47

— 141.13

— 140.34

— 133.83

— 130.39

— 123.38

— 120.20

— 117.02

— 113.84

— 84.12

— 24.82

— 17.03

— 17.02

— 17.00

— 0.14

S25

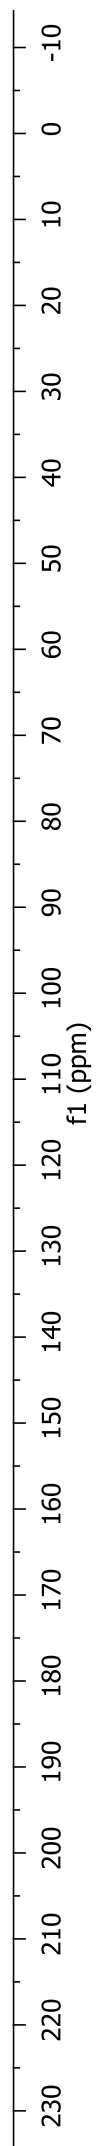

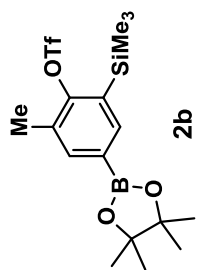

-73.38

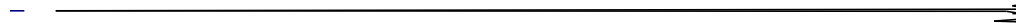

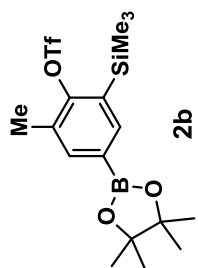

— 30.56

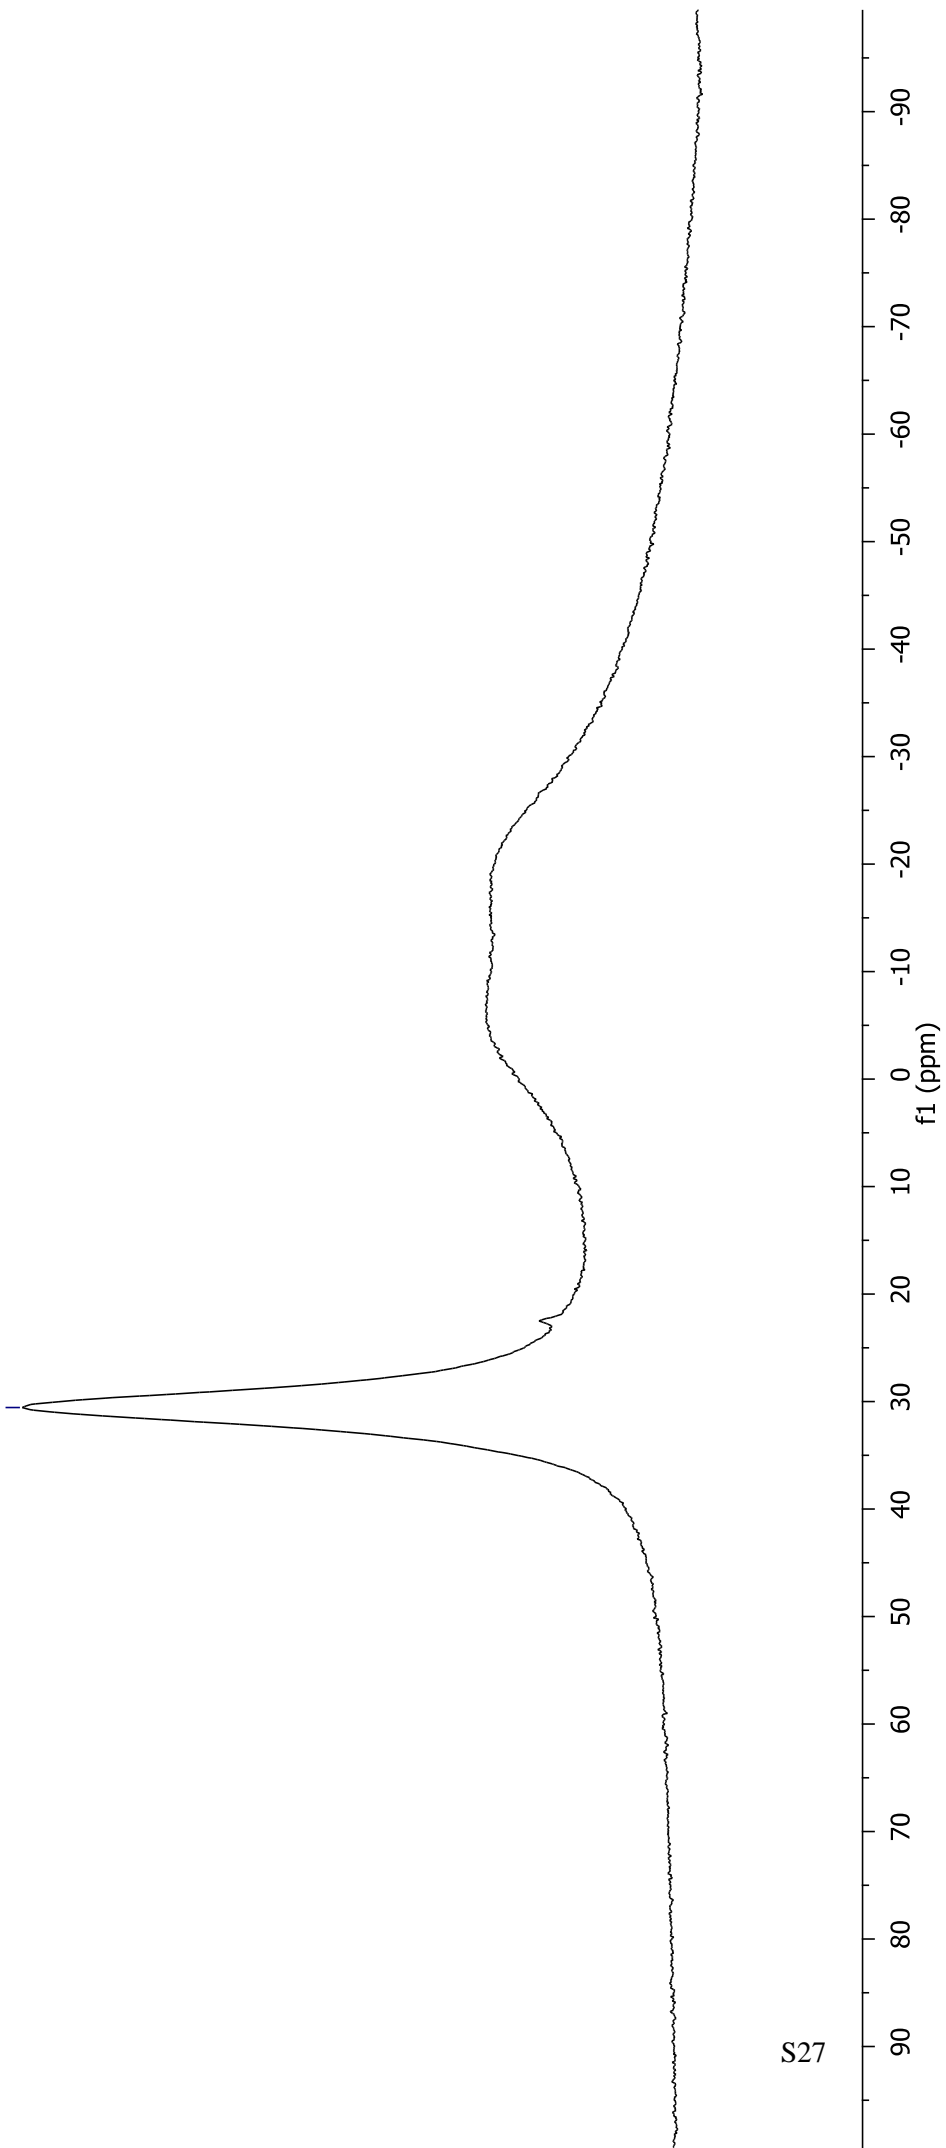



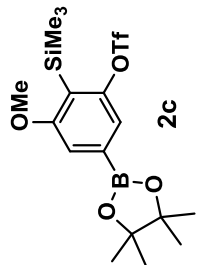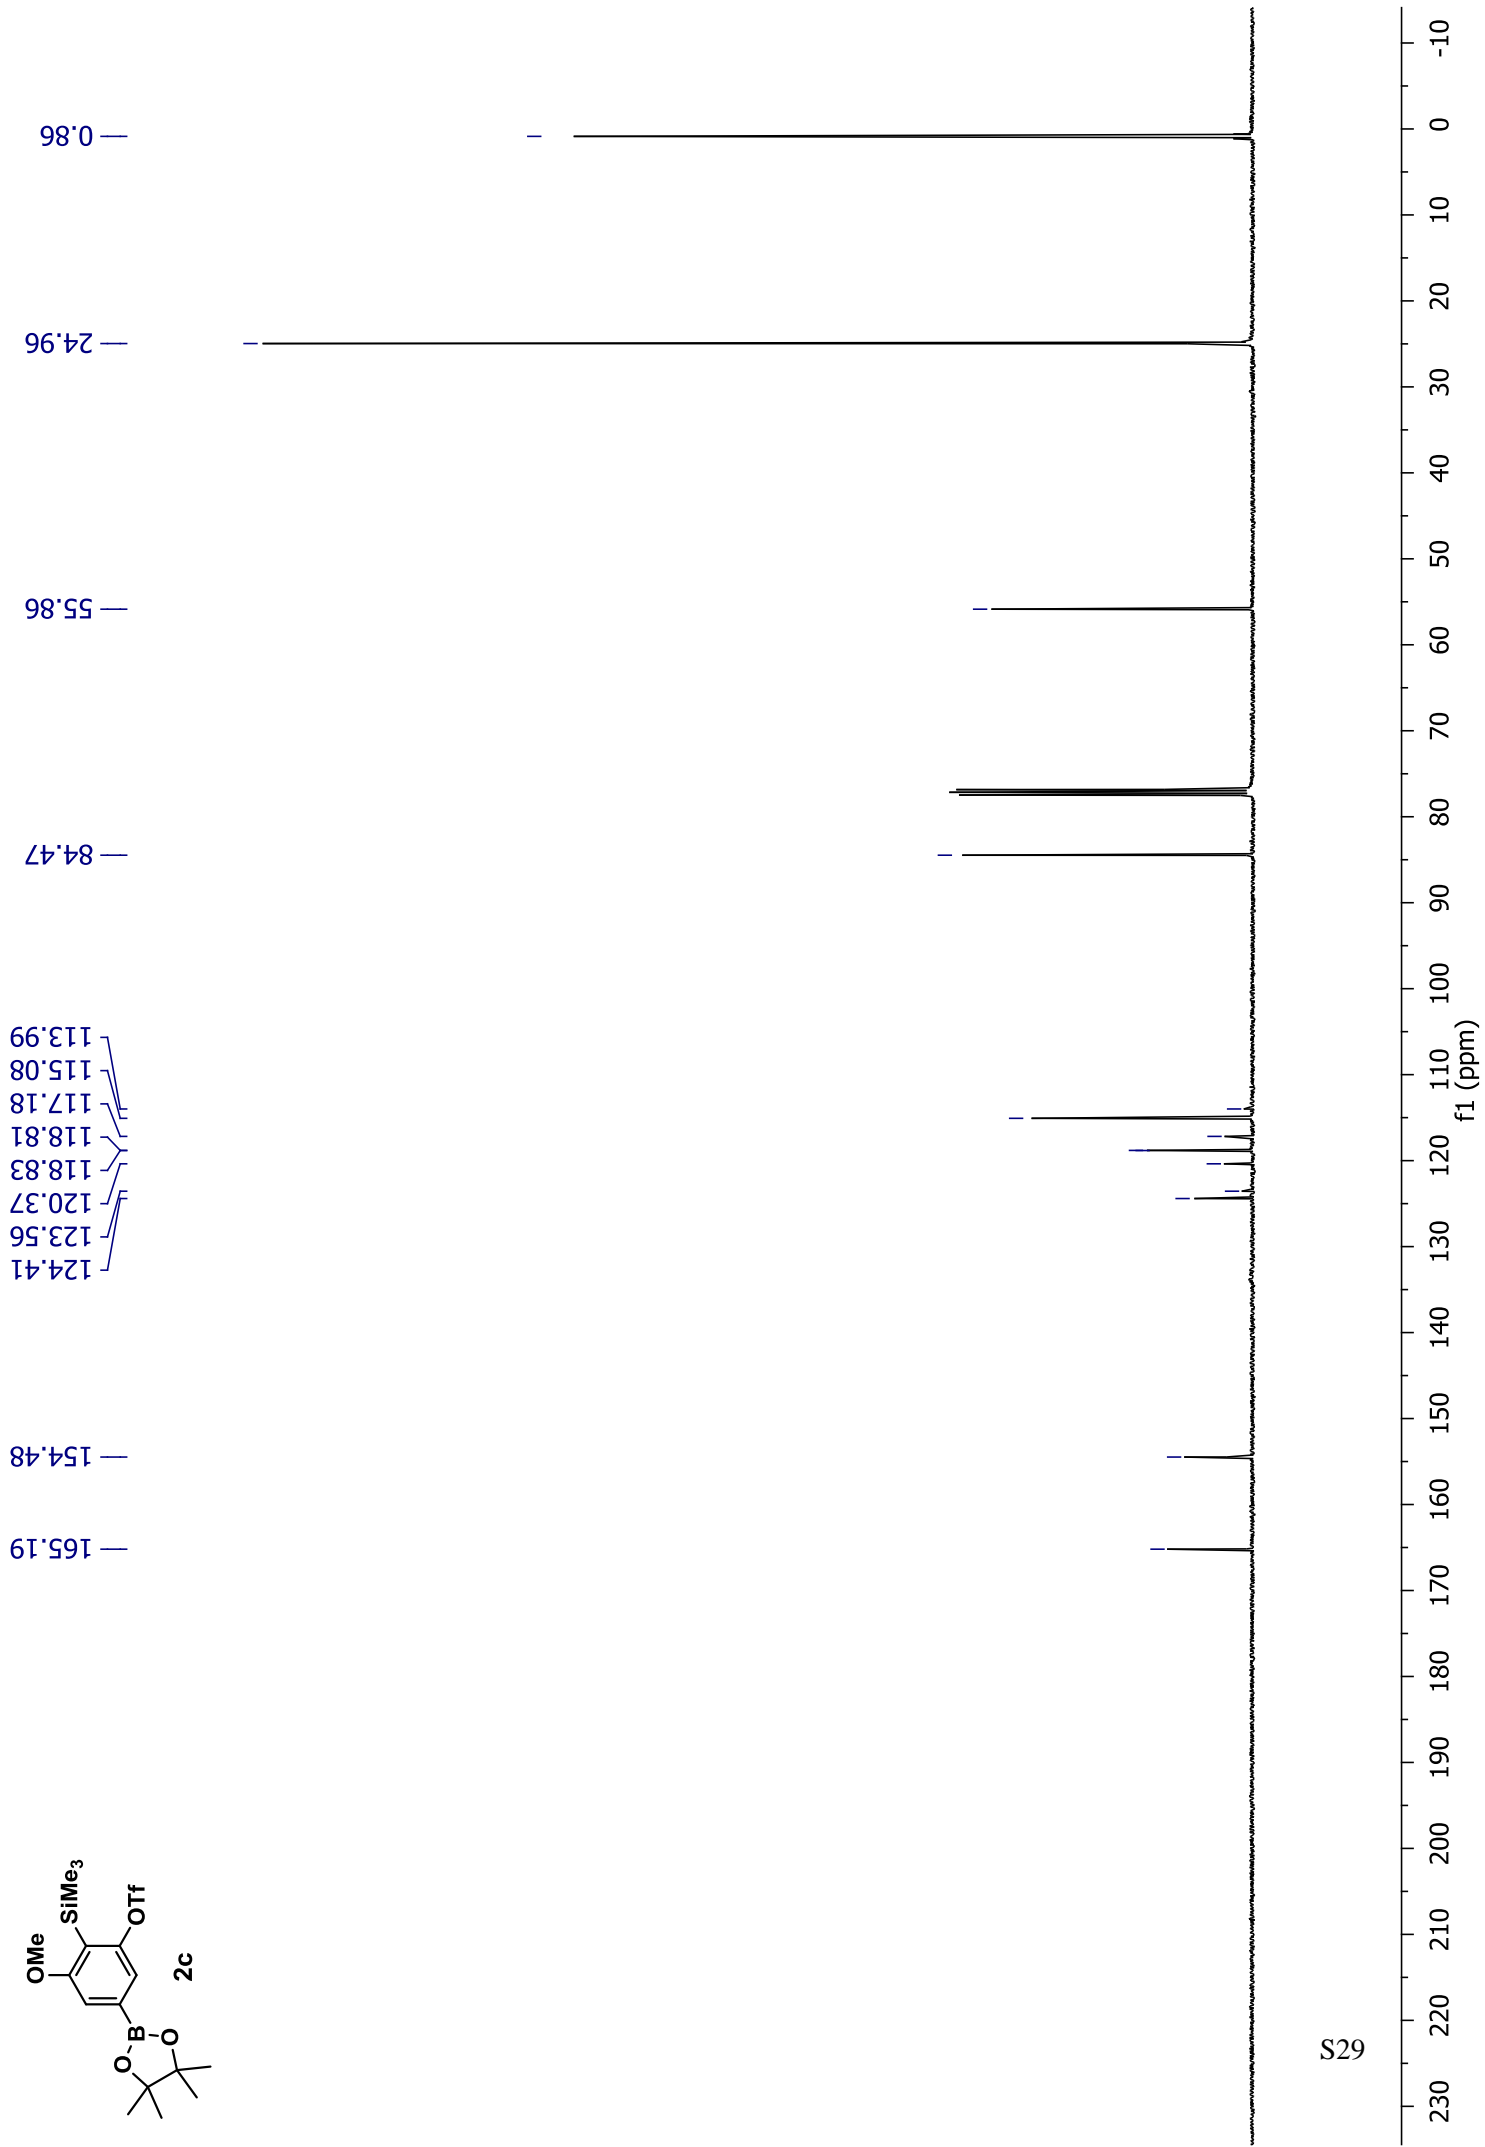

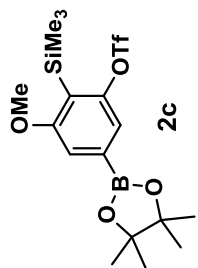

-72.80

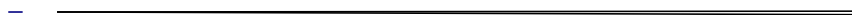

S30

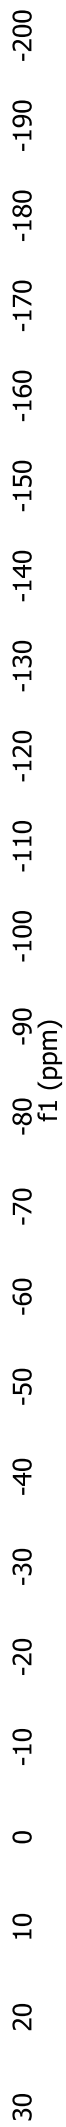





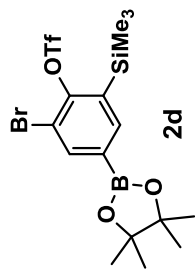

— 8.08  
— 7.88

— 1.34  
— 0.41

— 9.00

CS2

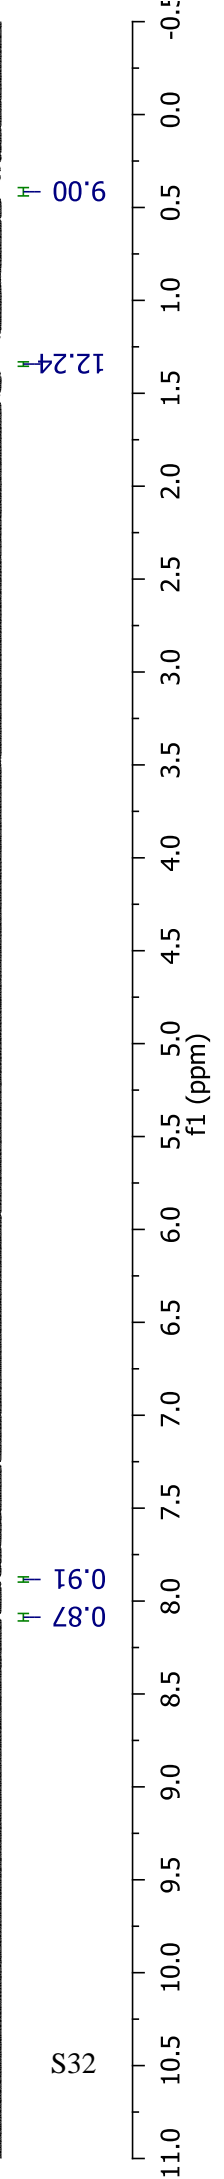

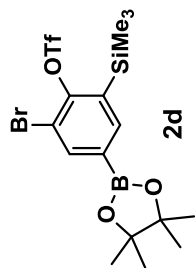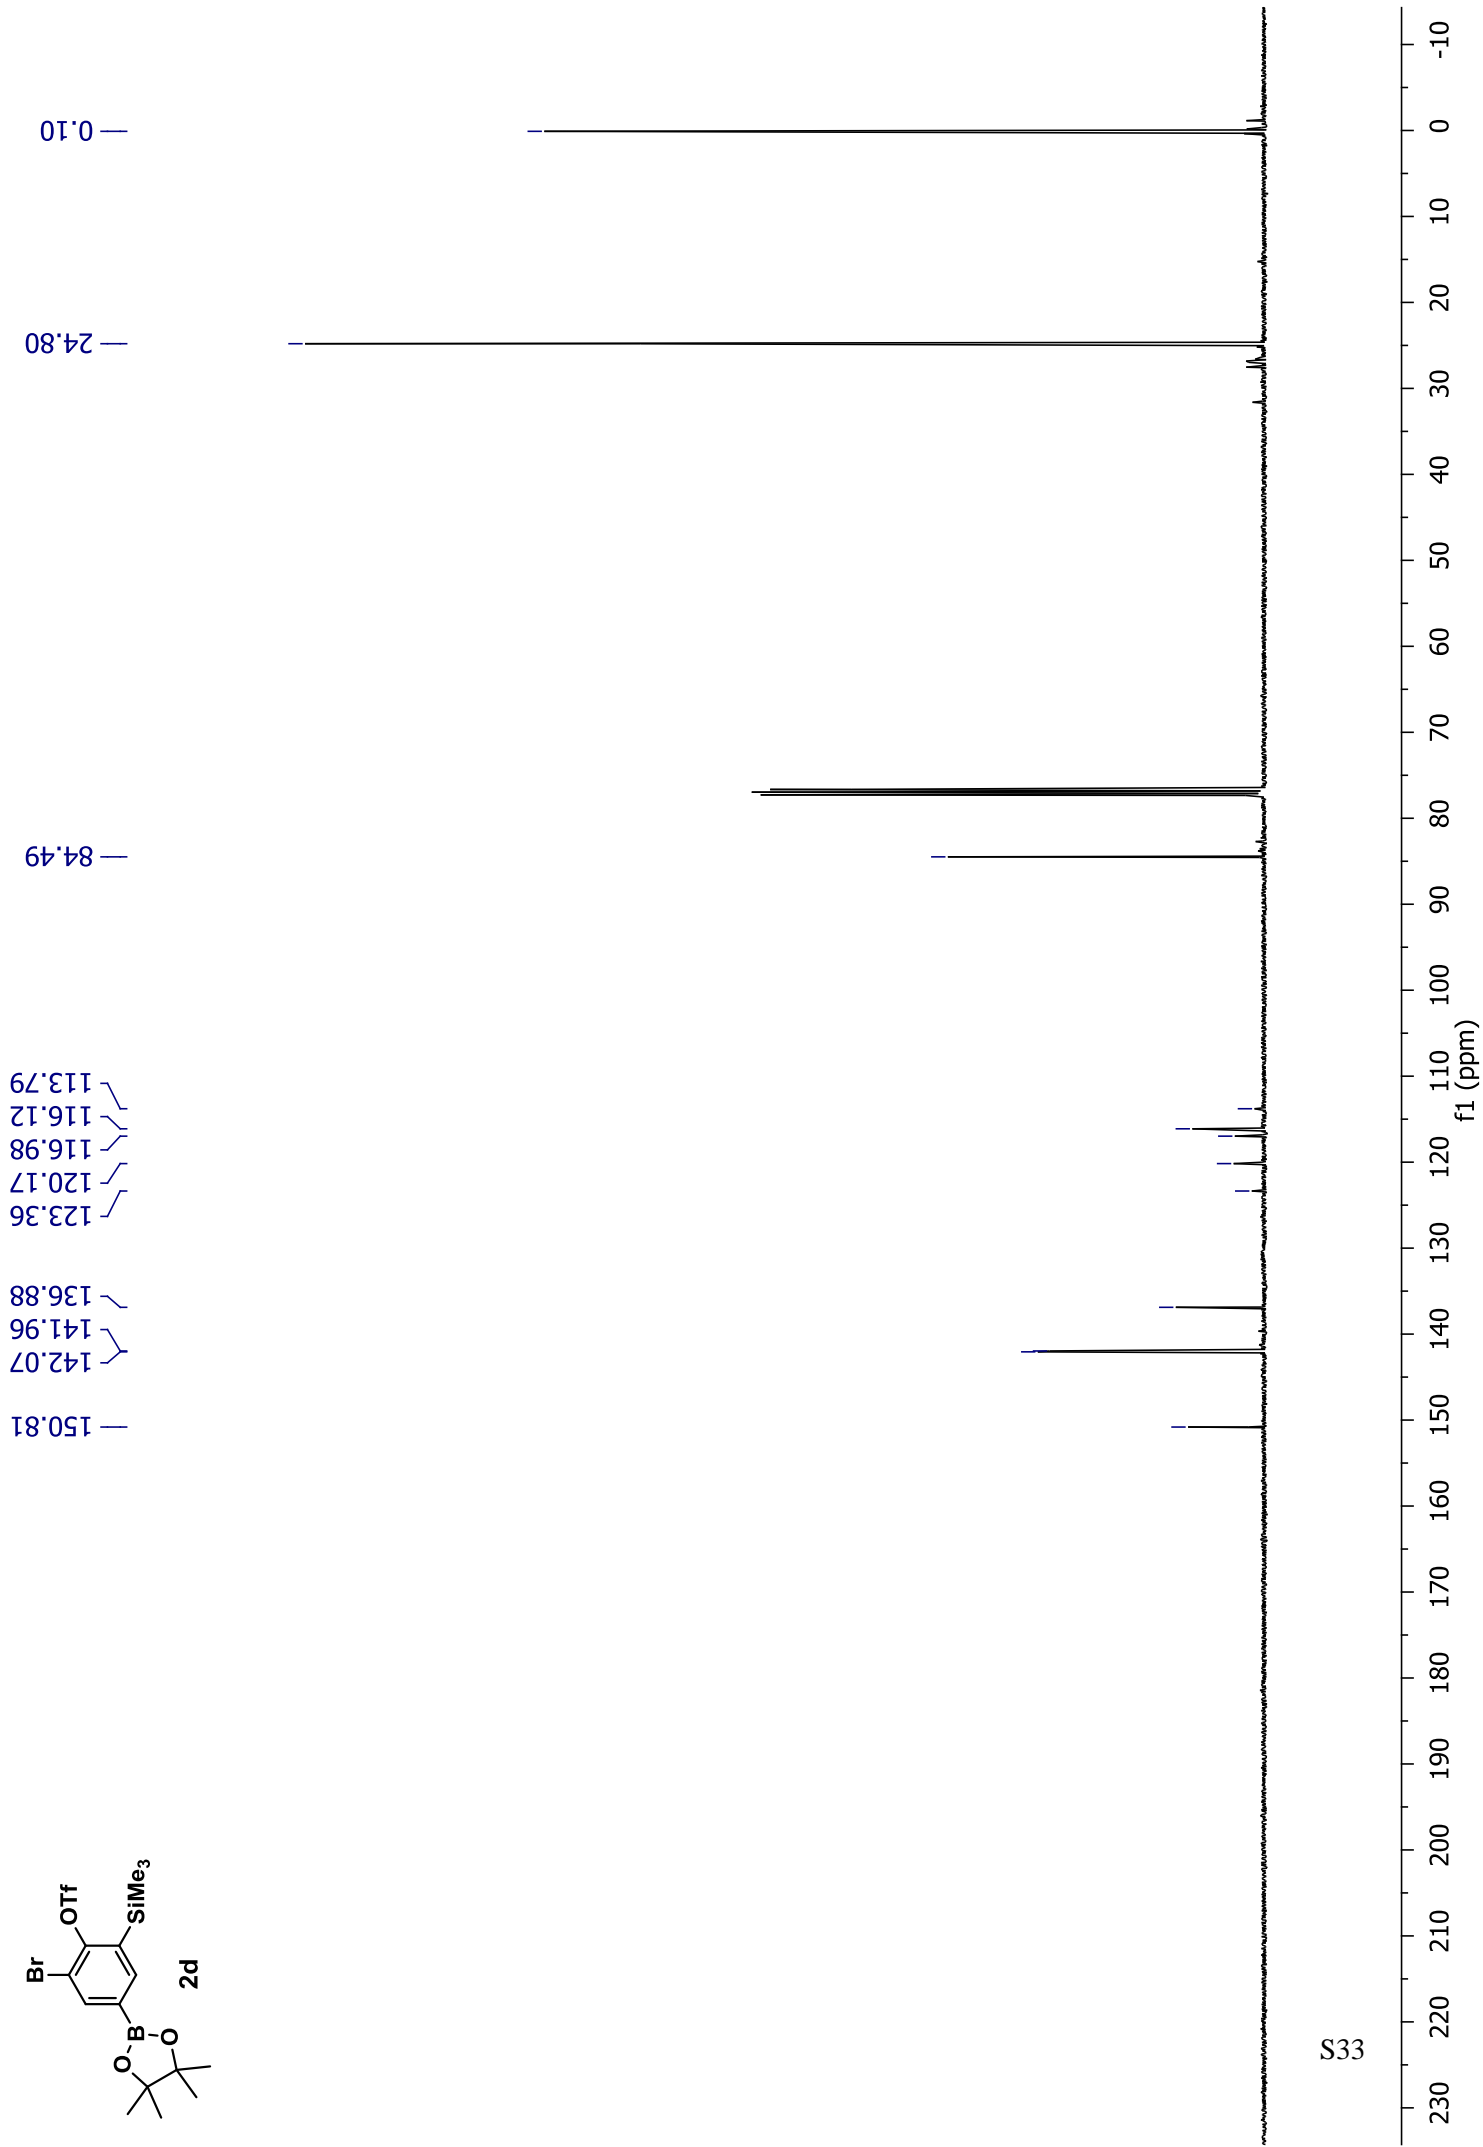

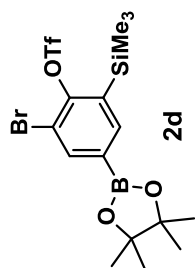

-71.60

-



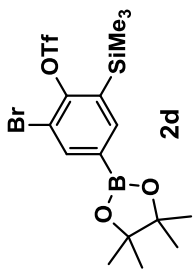

— 30.02

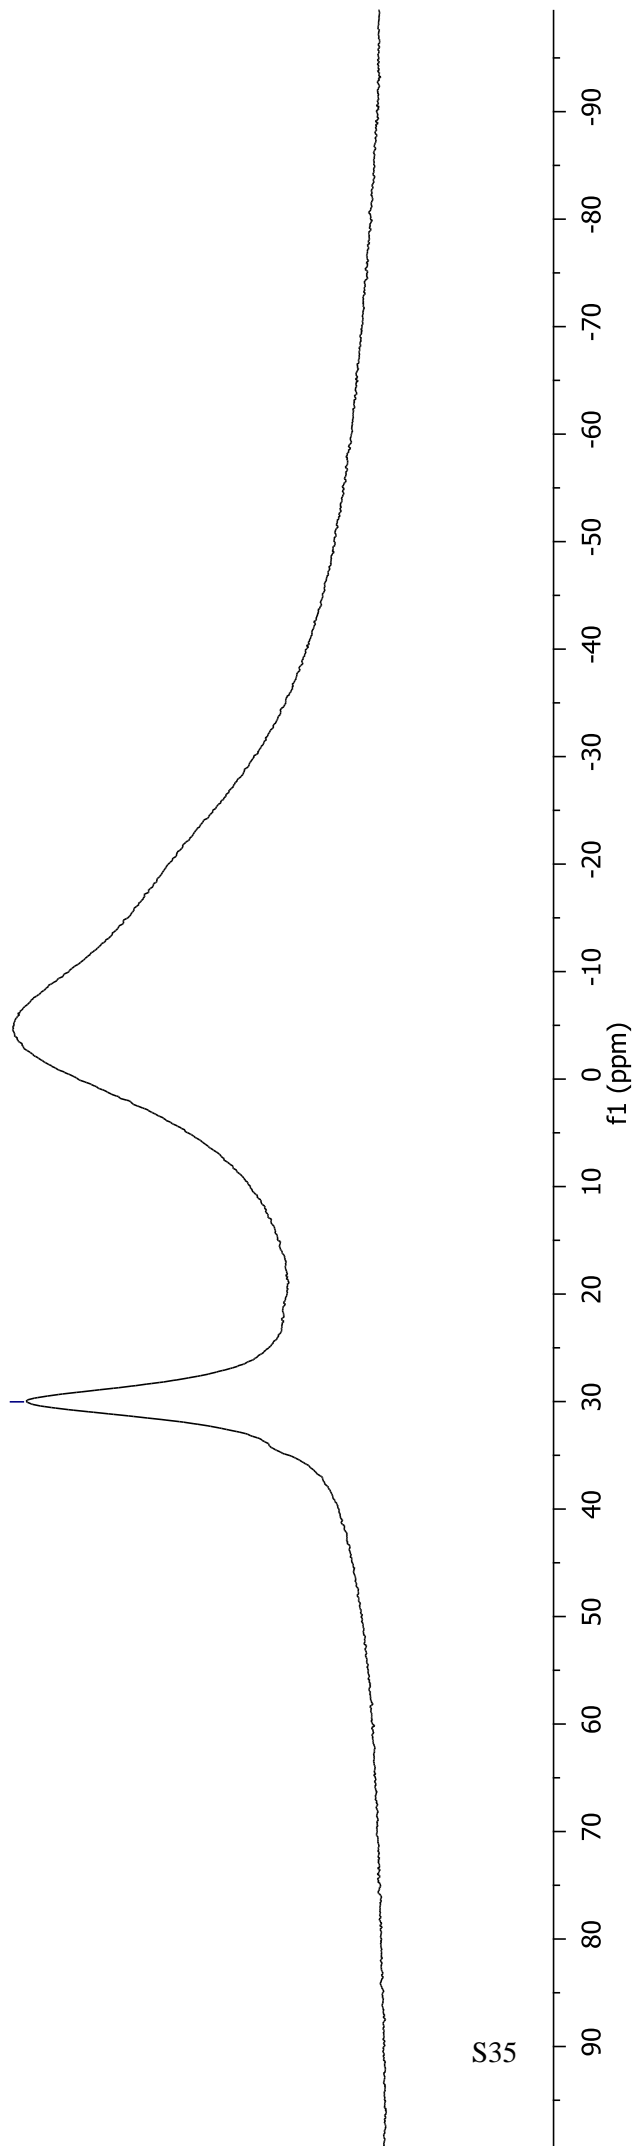

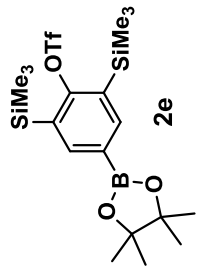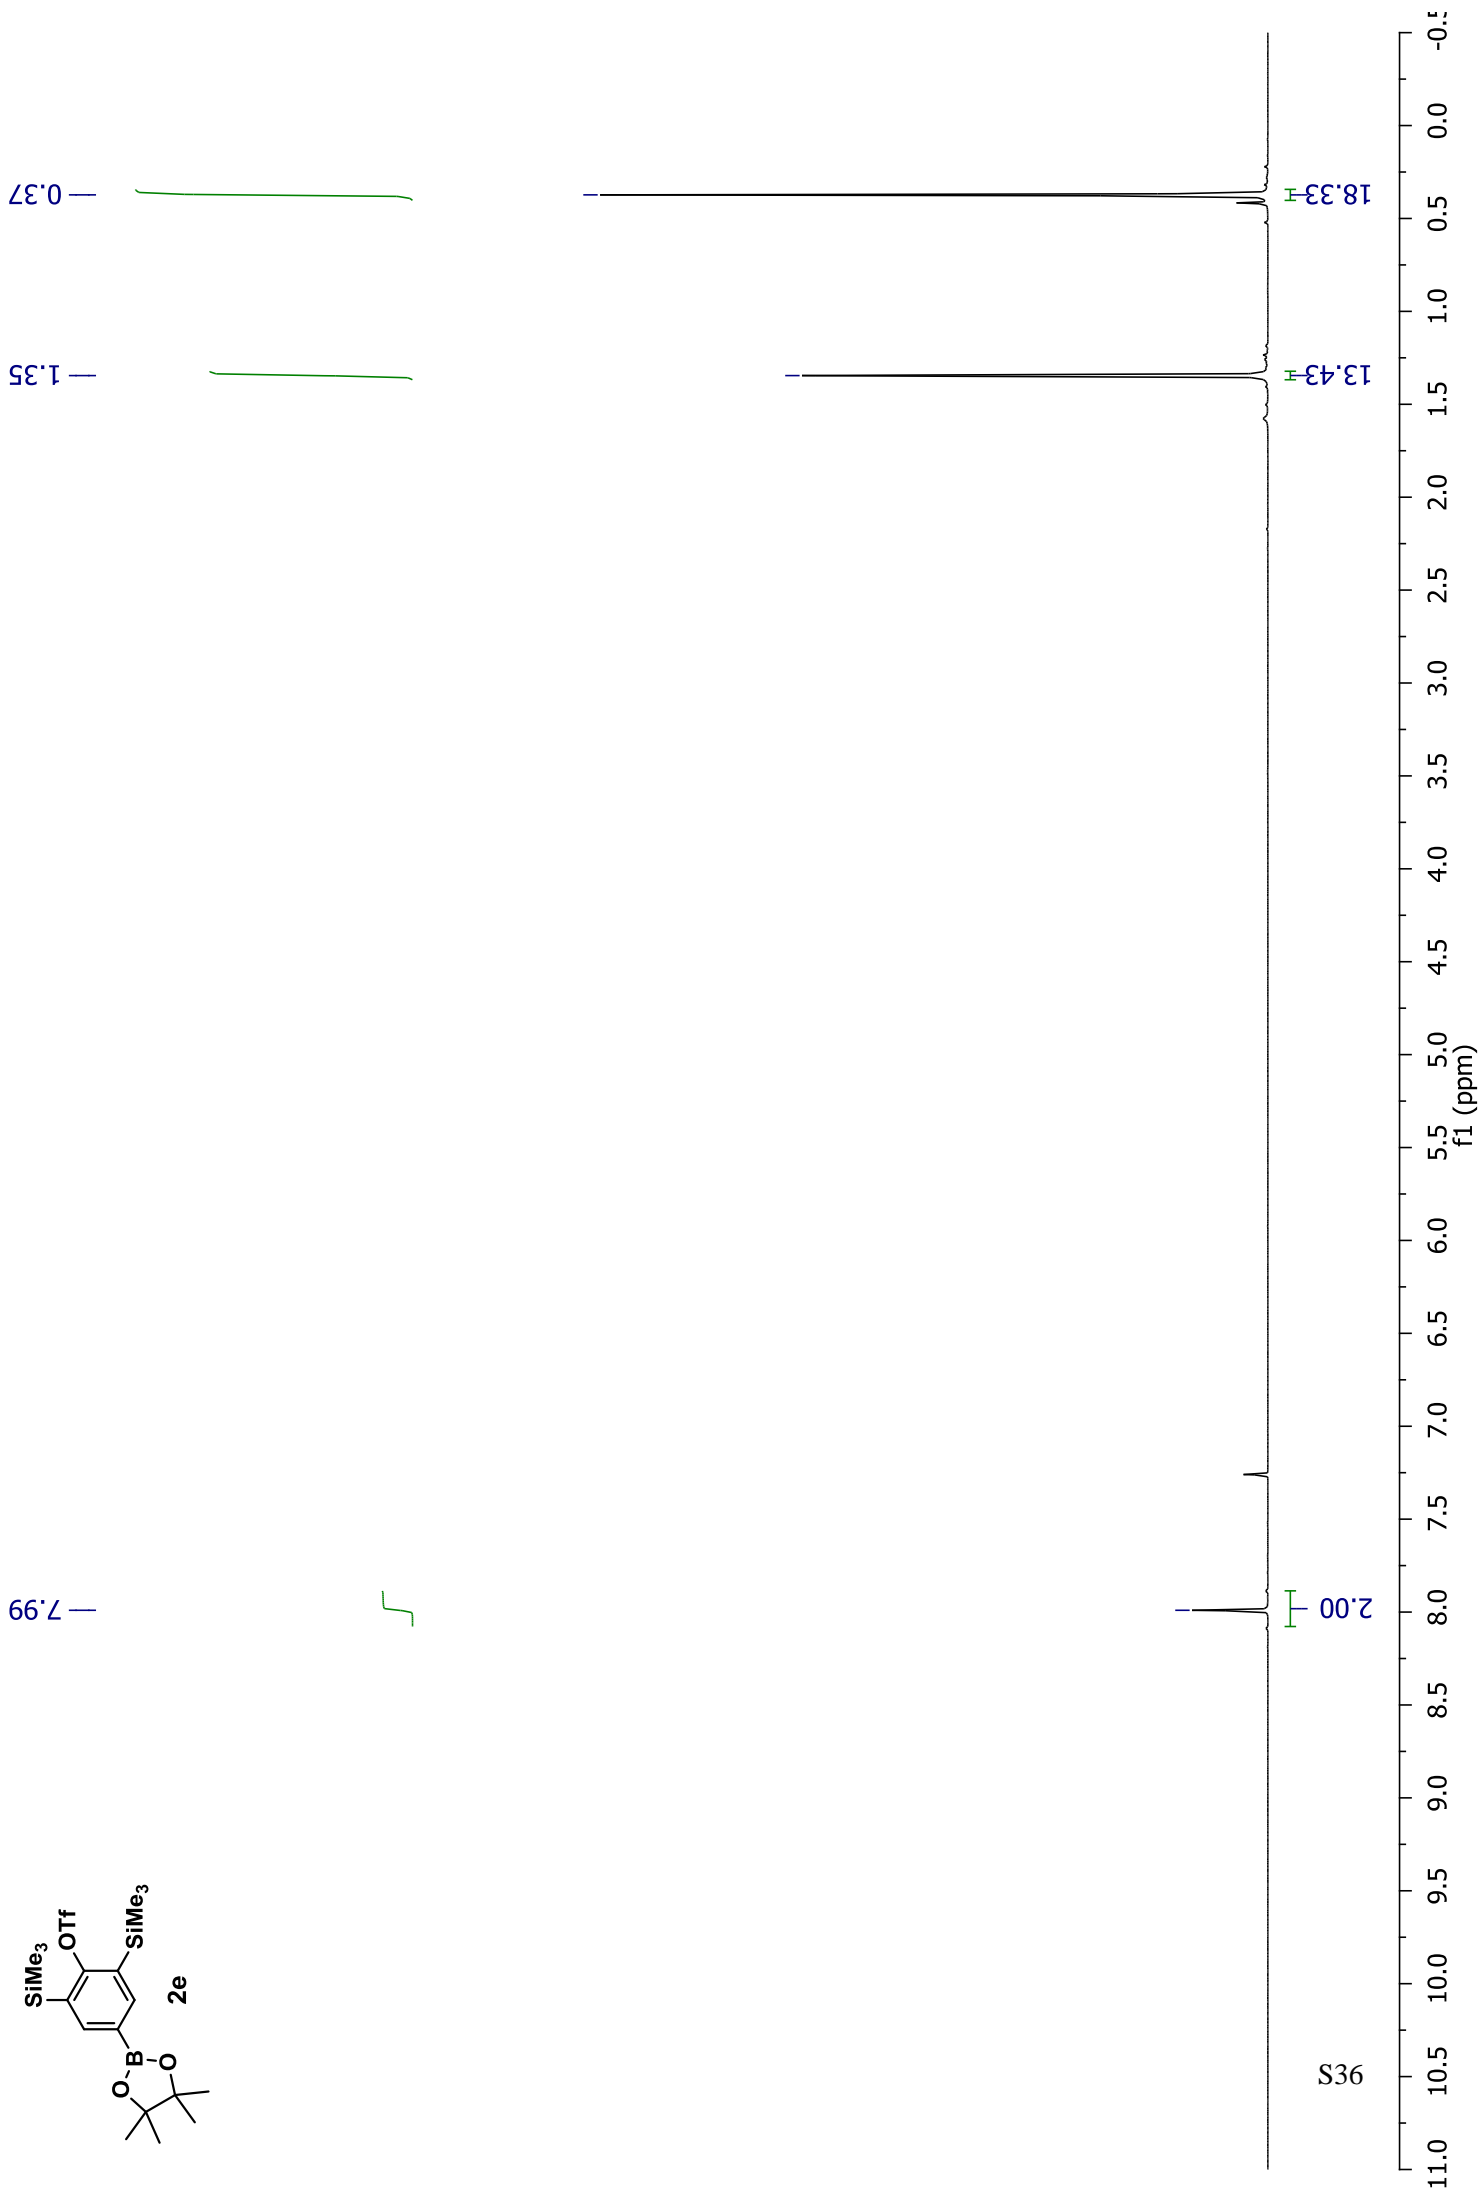

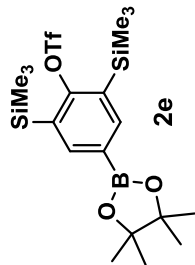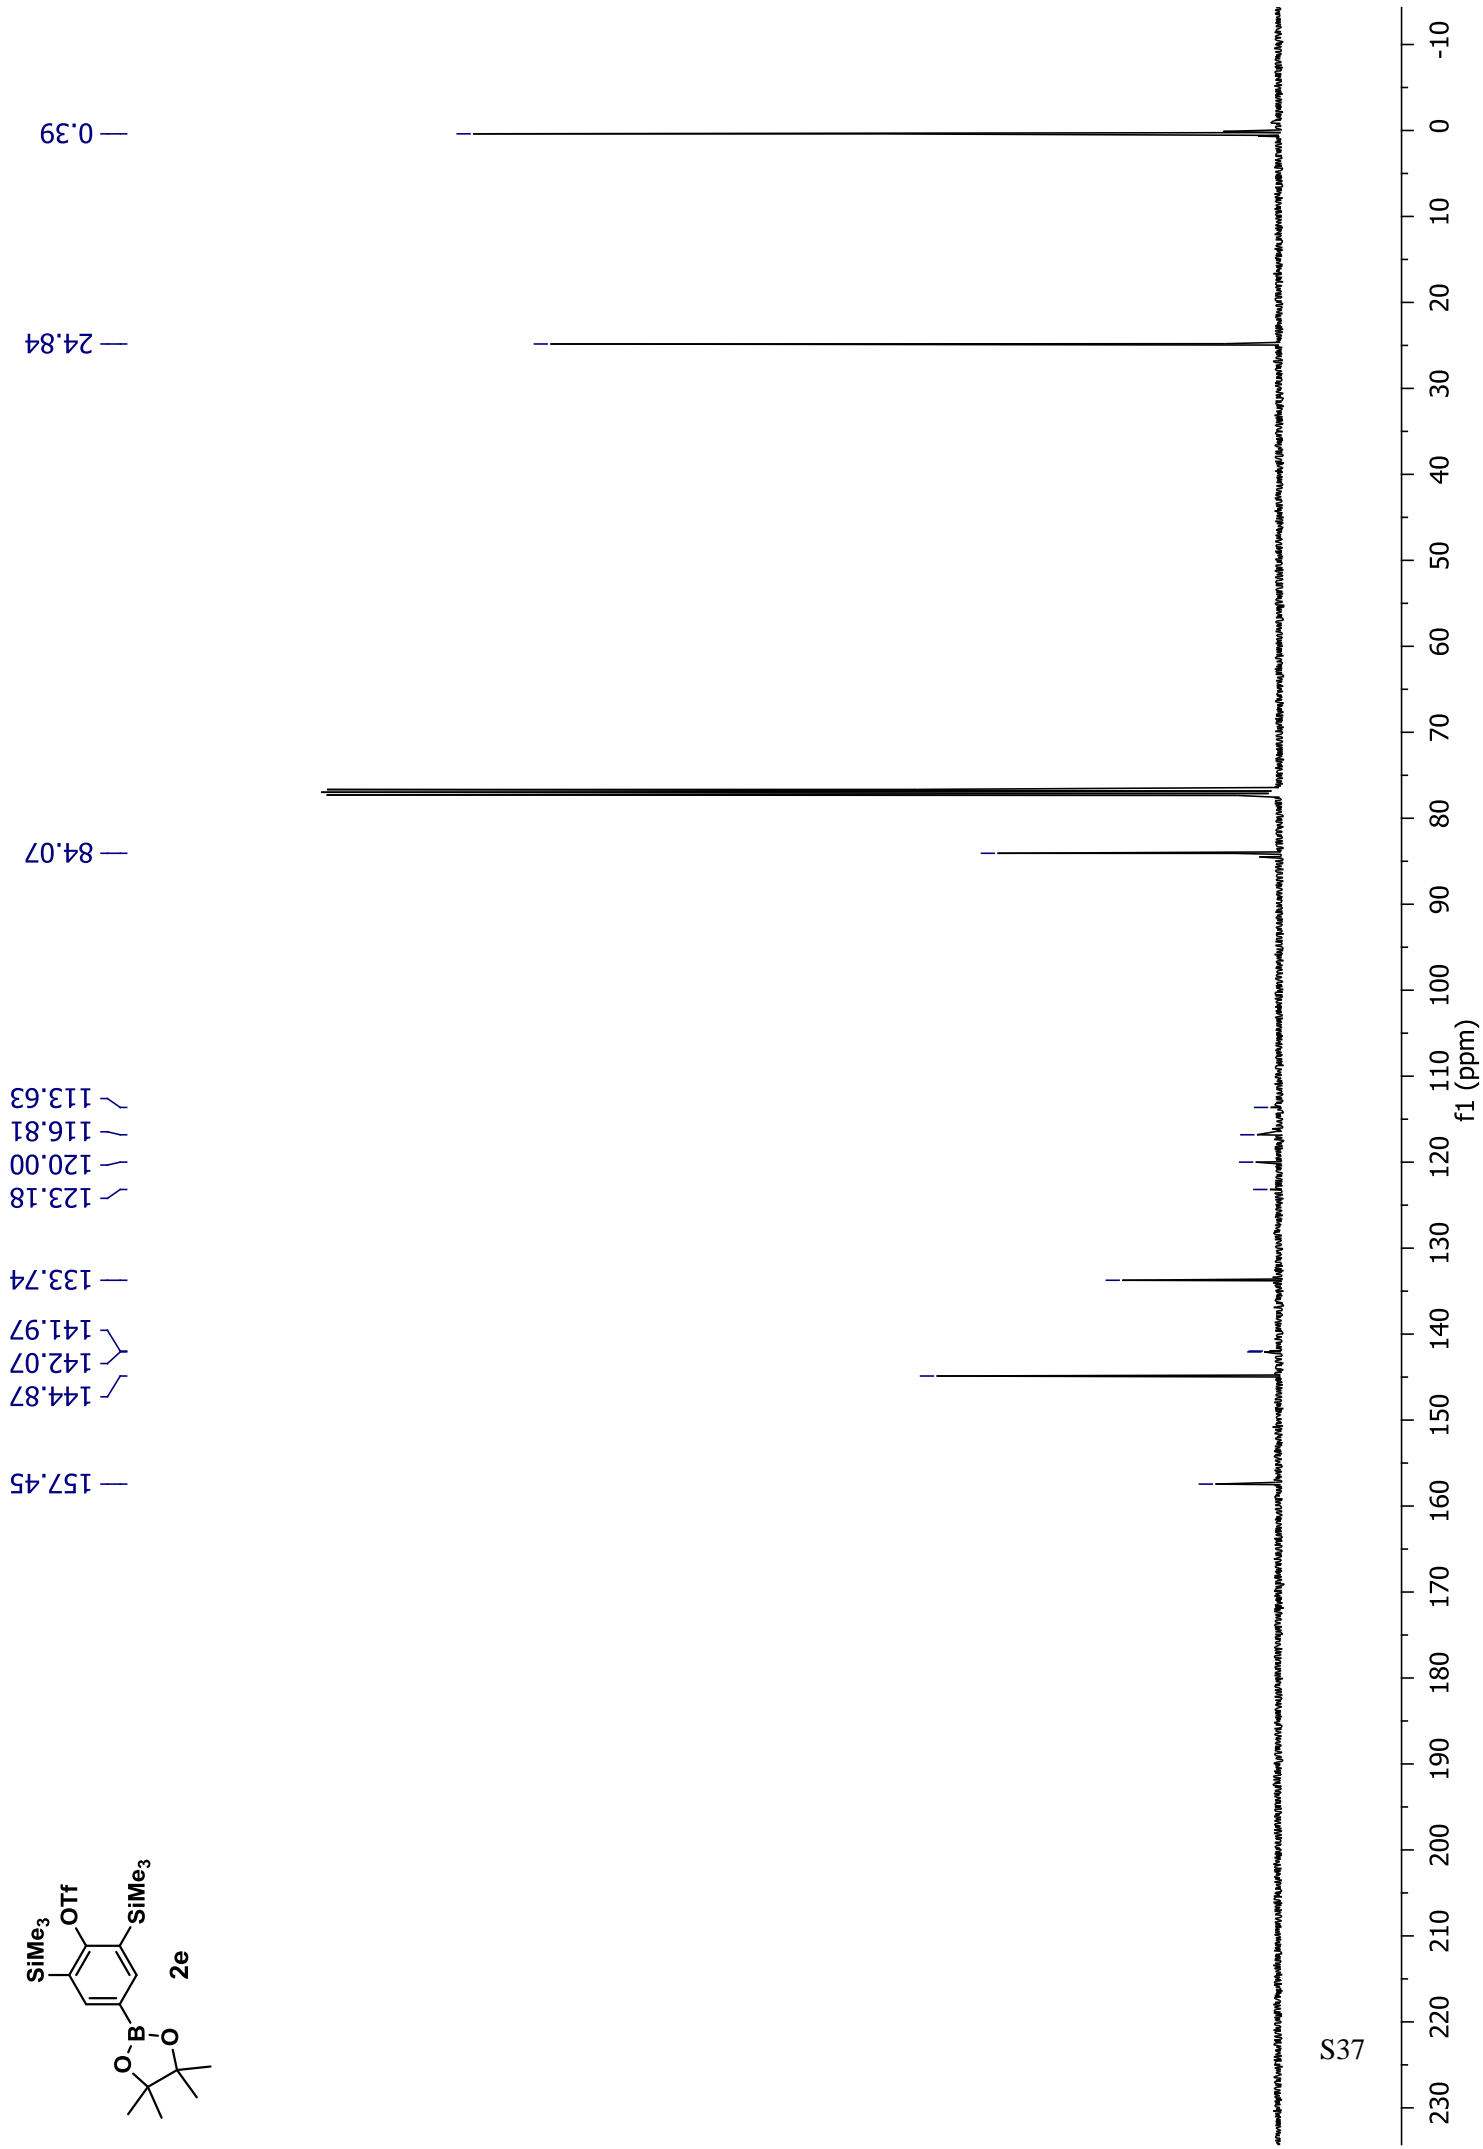



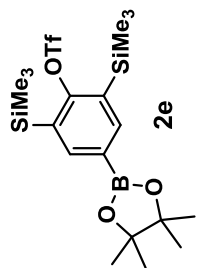

— 30.55

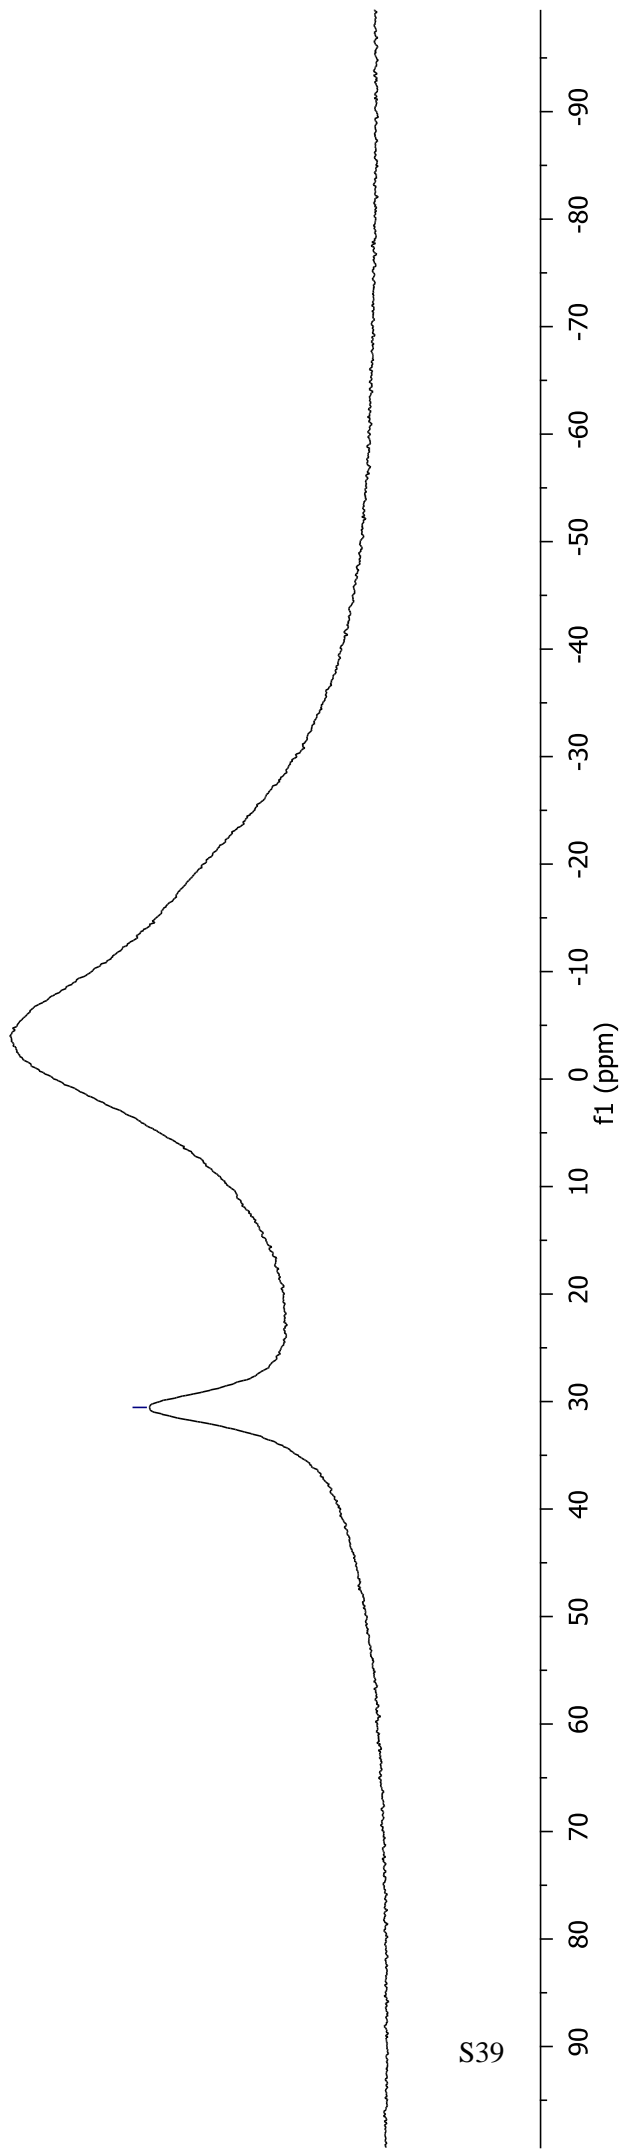

S39



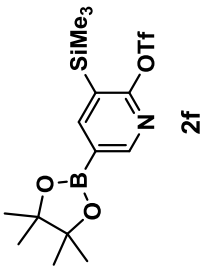

8.23  
8.24  
8.65  
8.65

1.34  
0.37

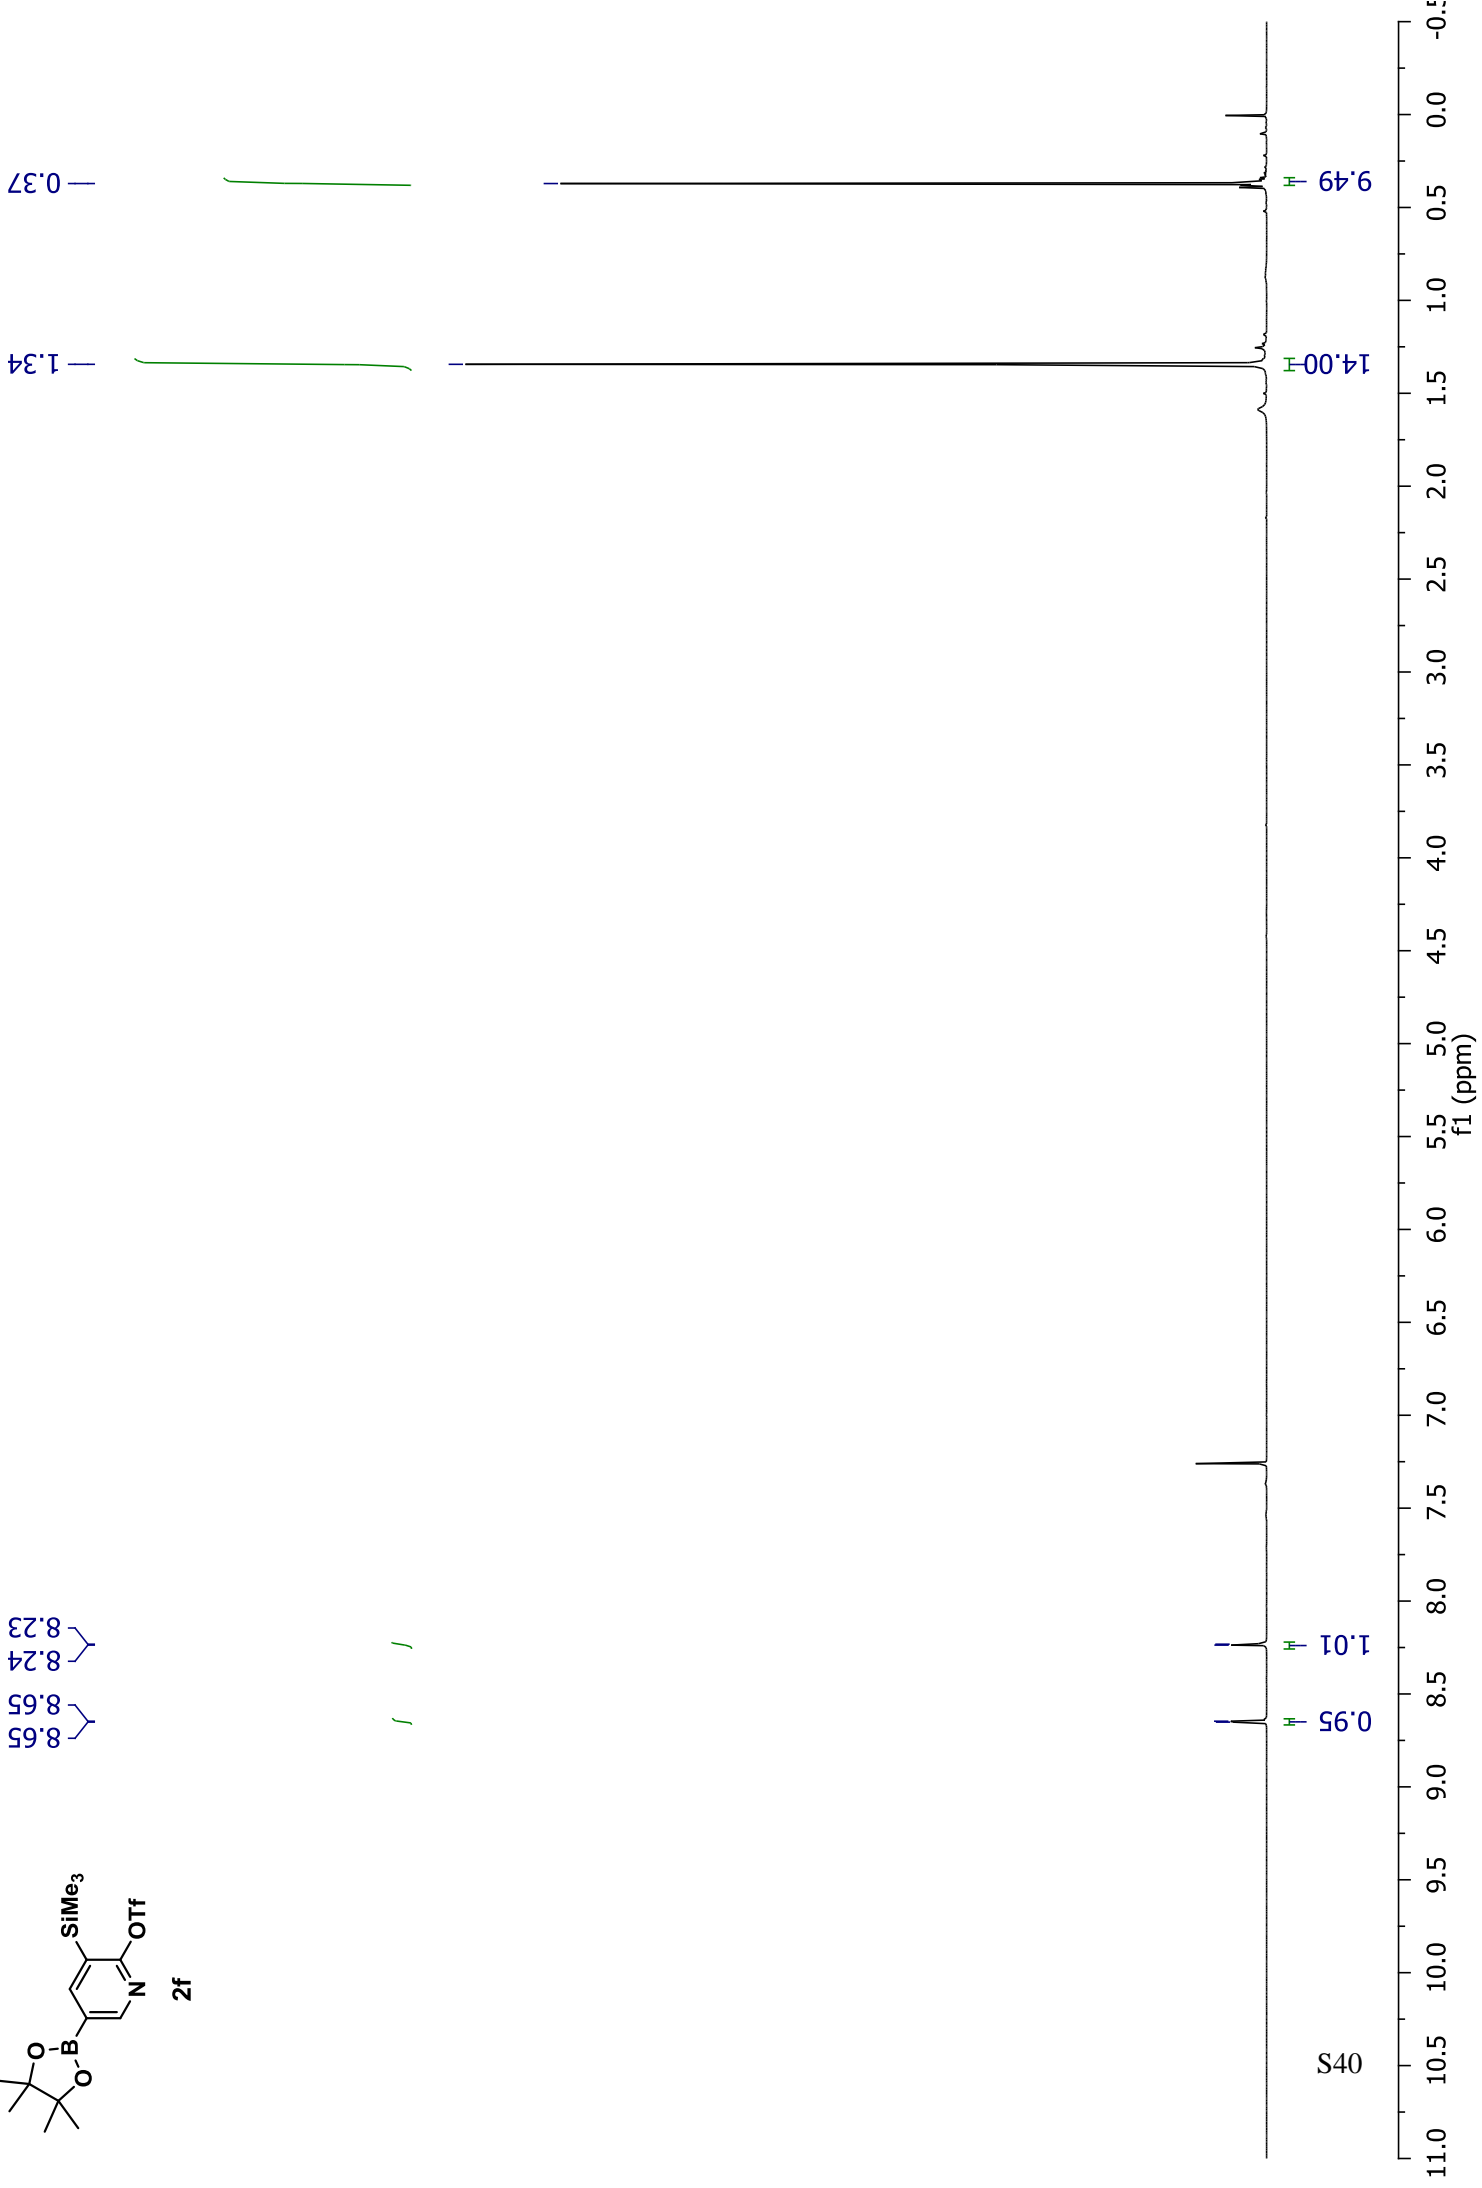

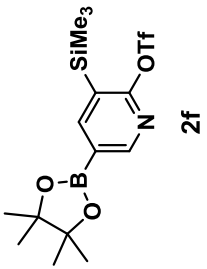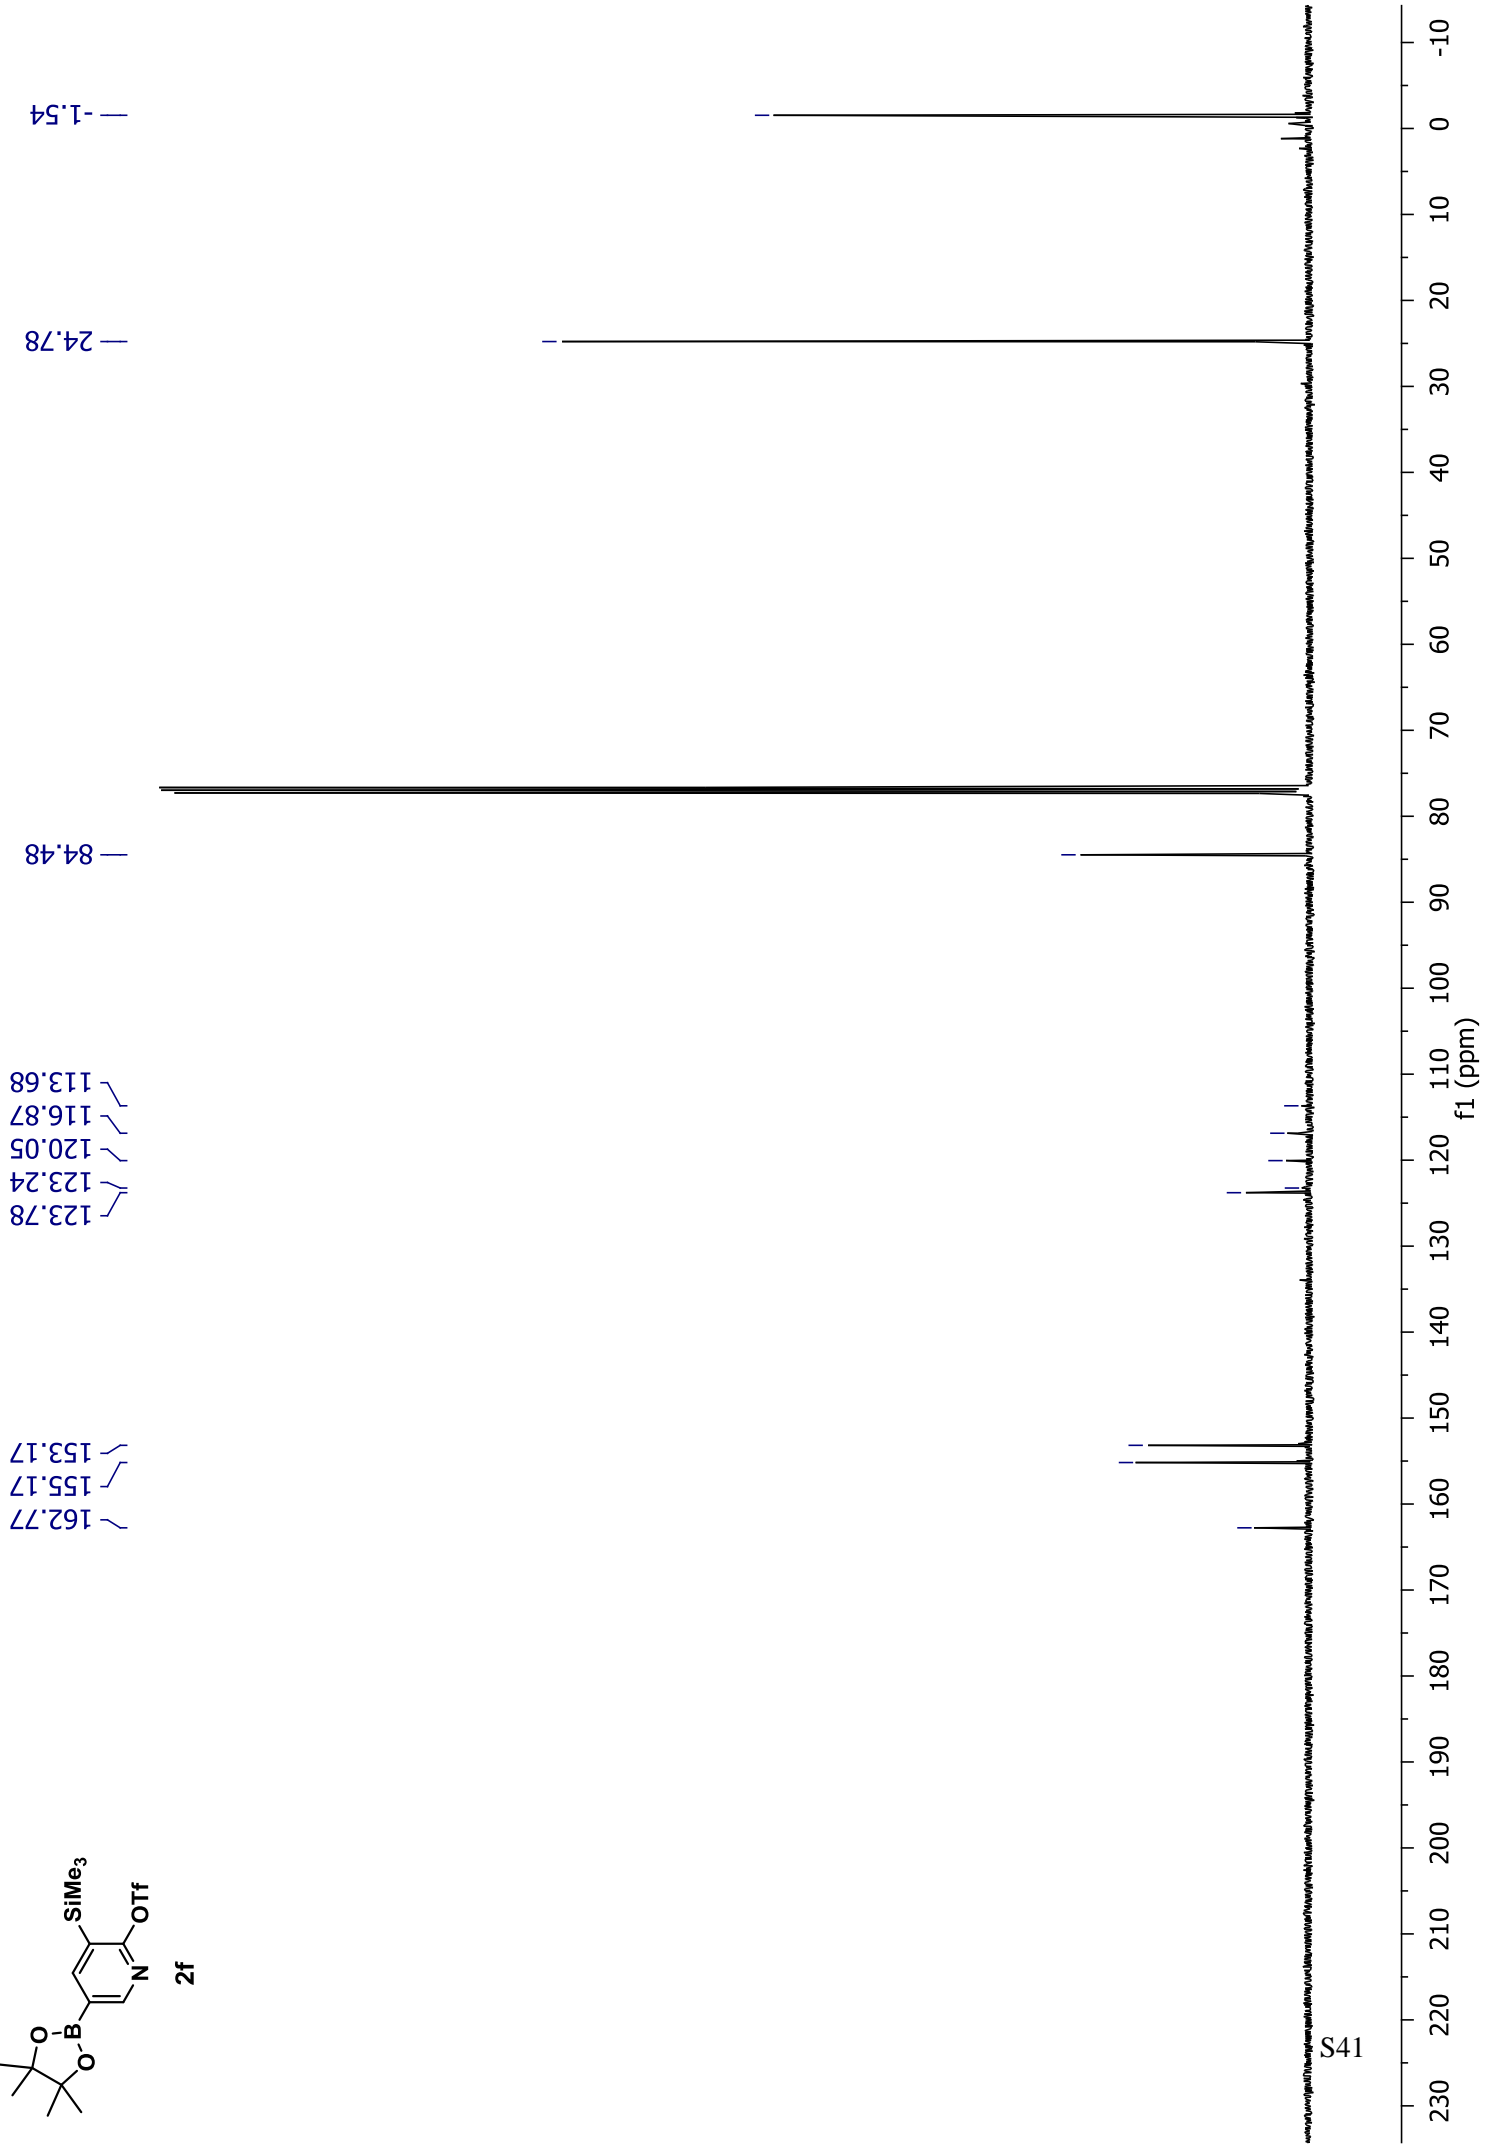

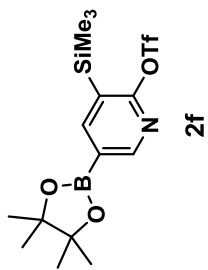

-72.82

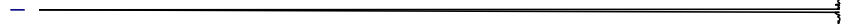

S42

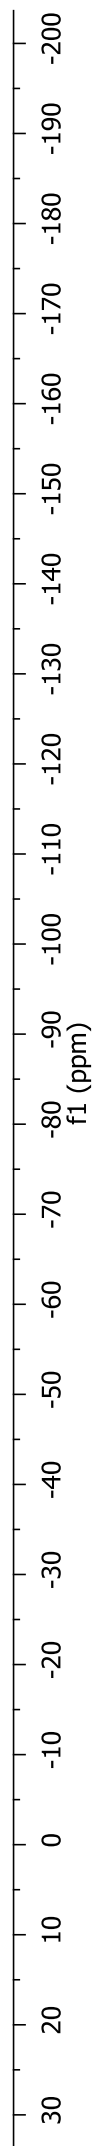

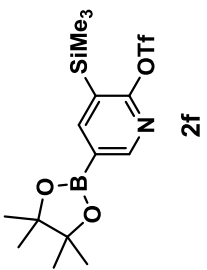

— 30.42

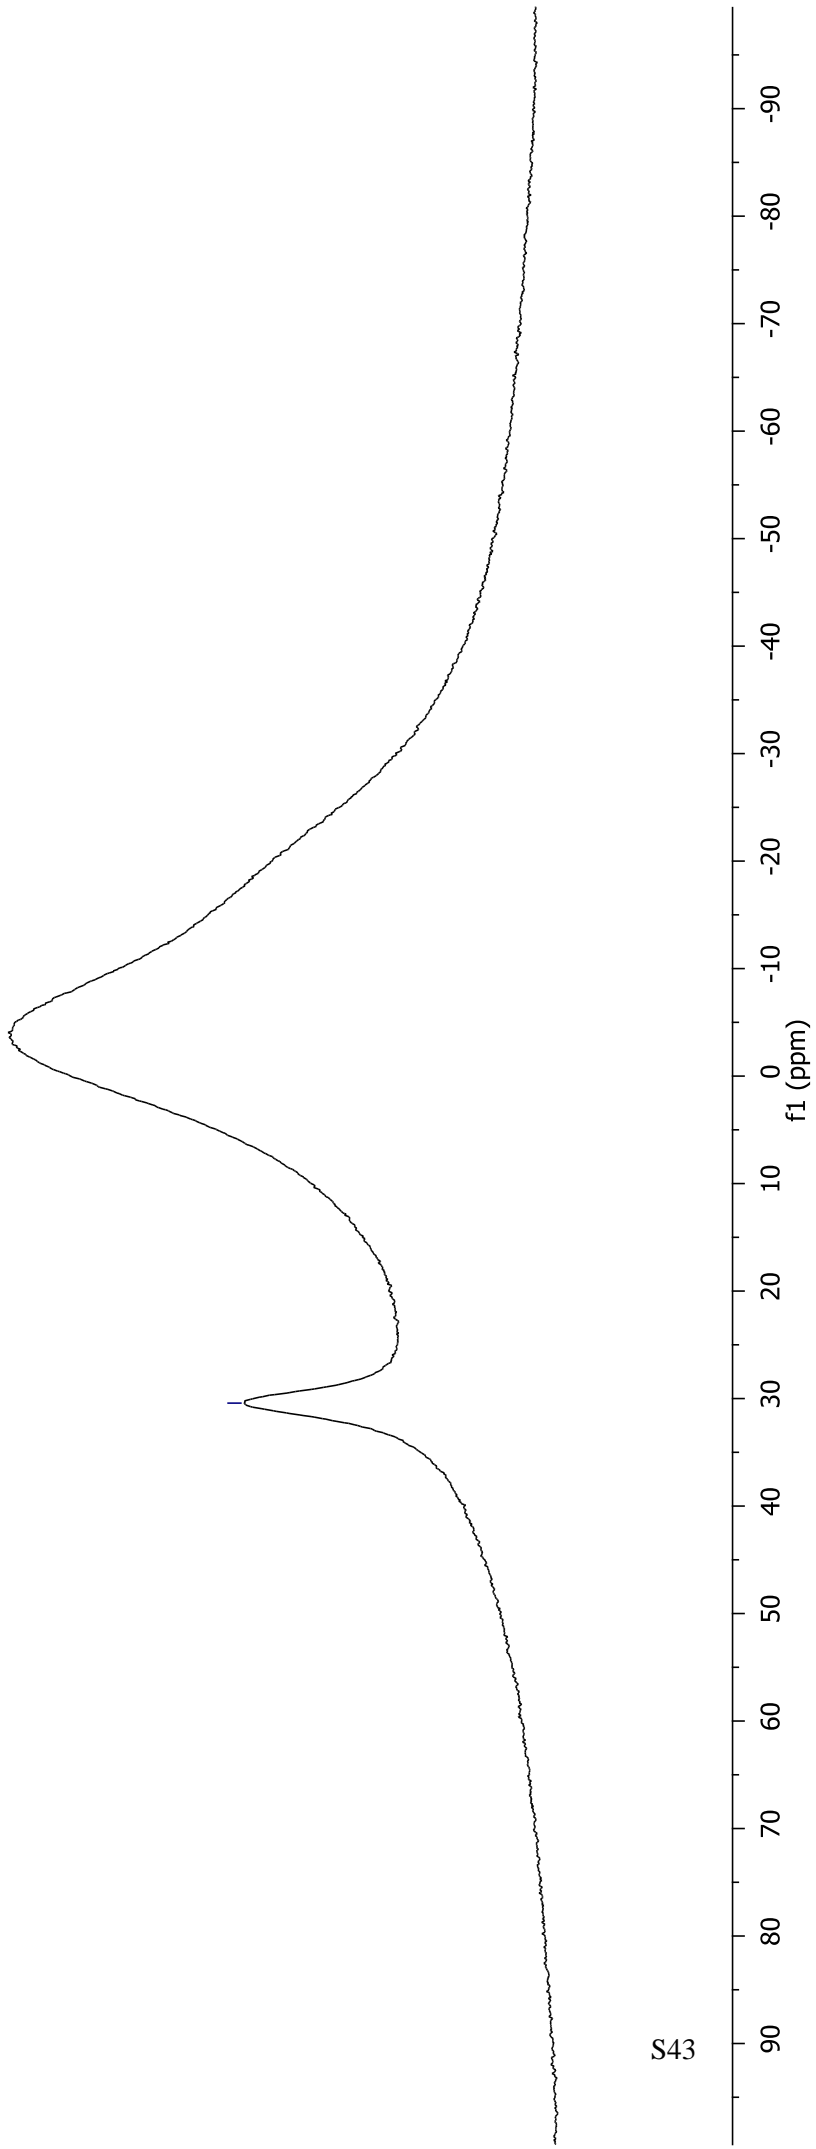

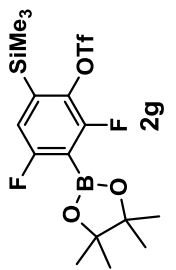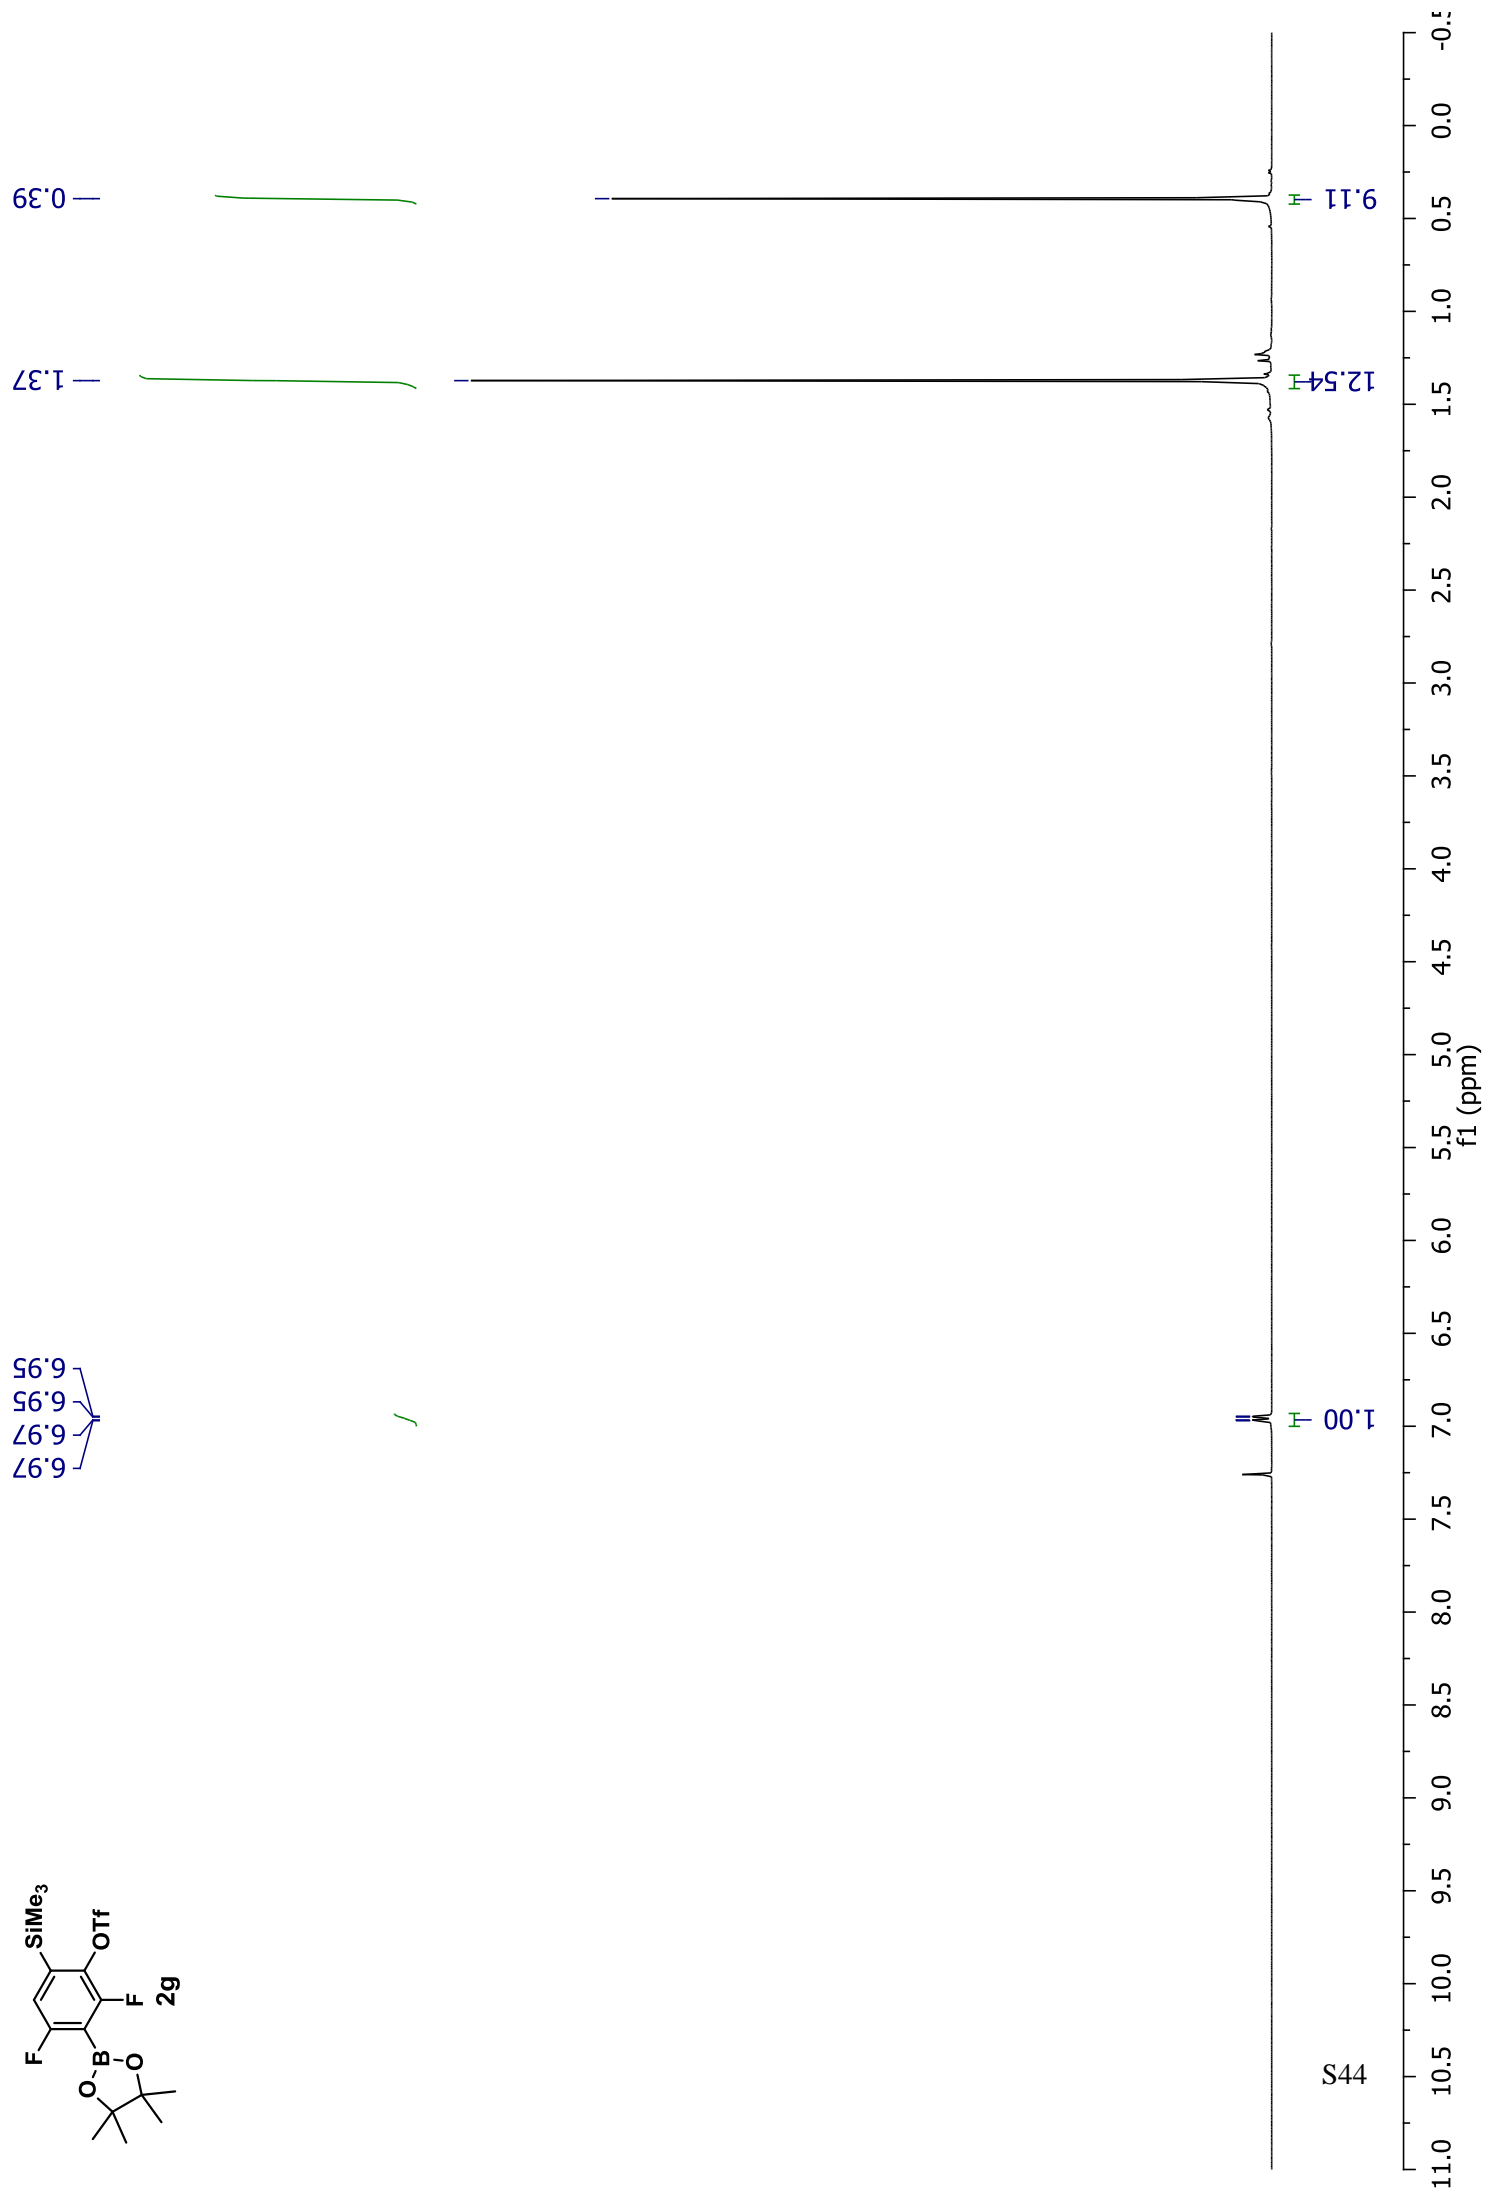

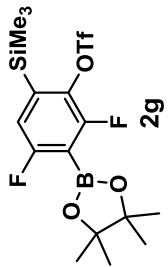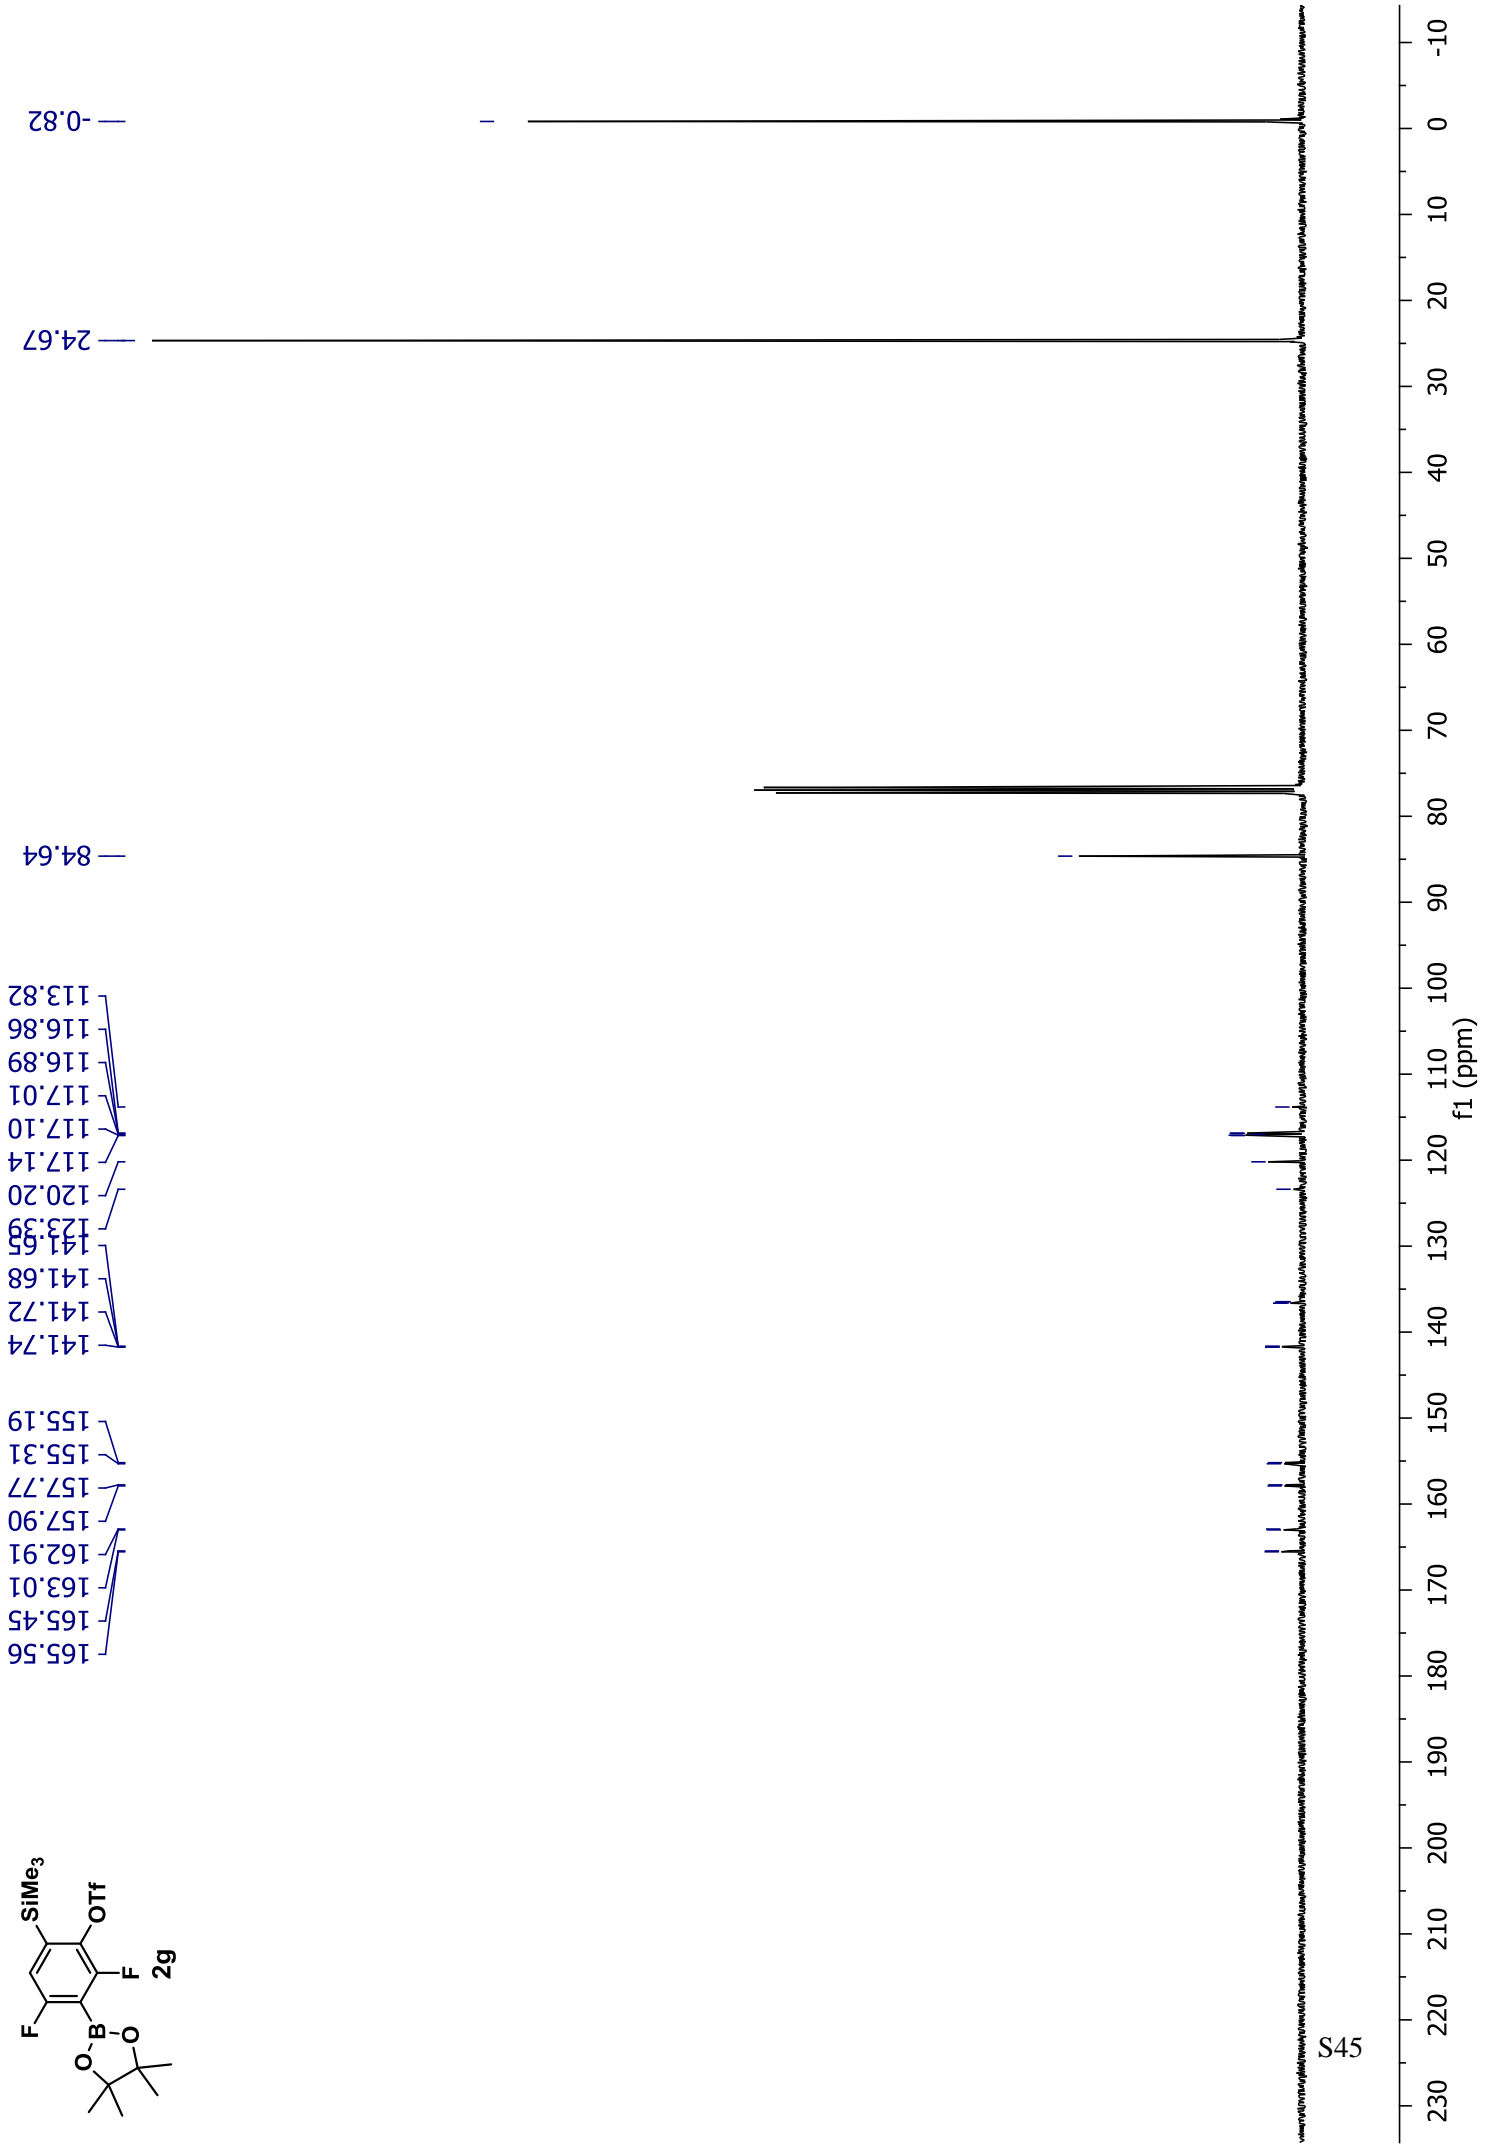

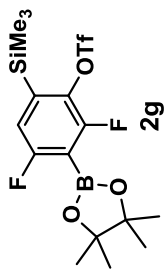

-71.99  
-72.05

-99.88  
-99.89  
-99.89  
-99.90  
-99.92

-112.06  
-112.08  
-112.12  
-112.13

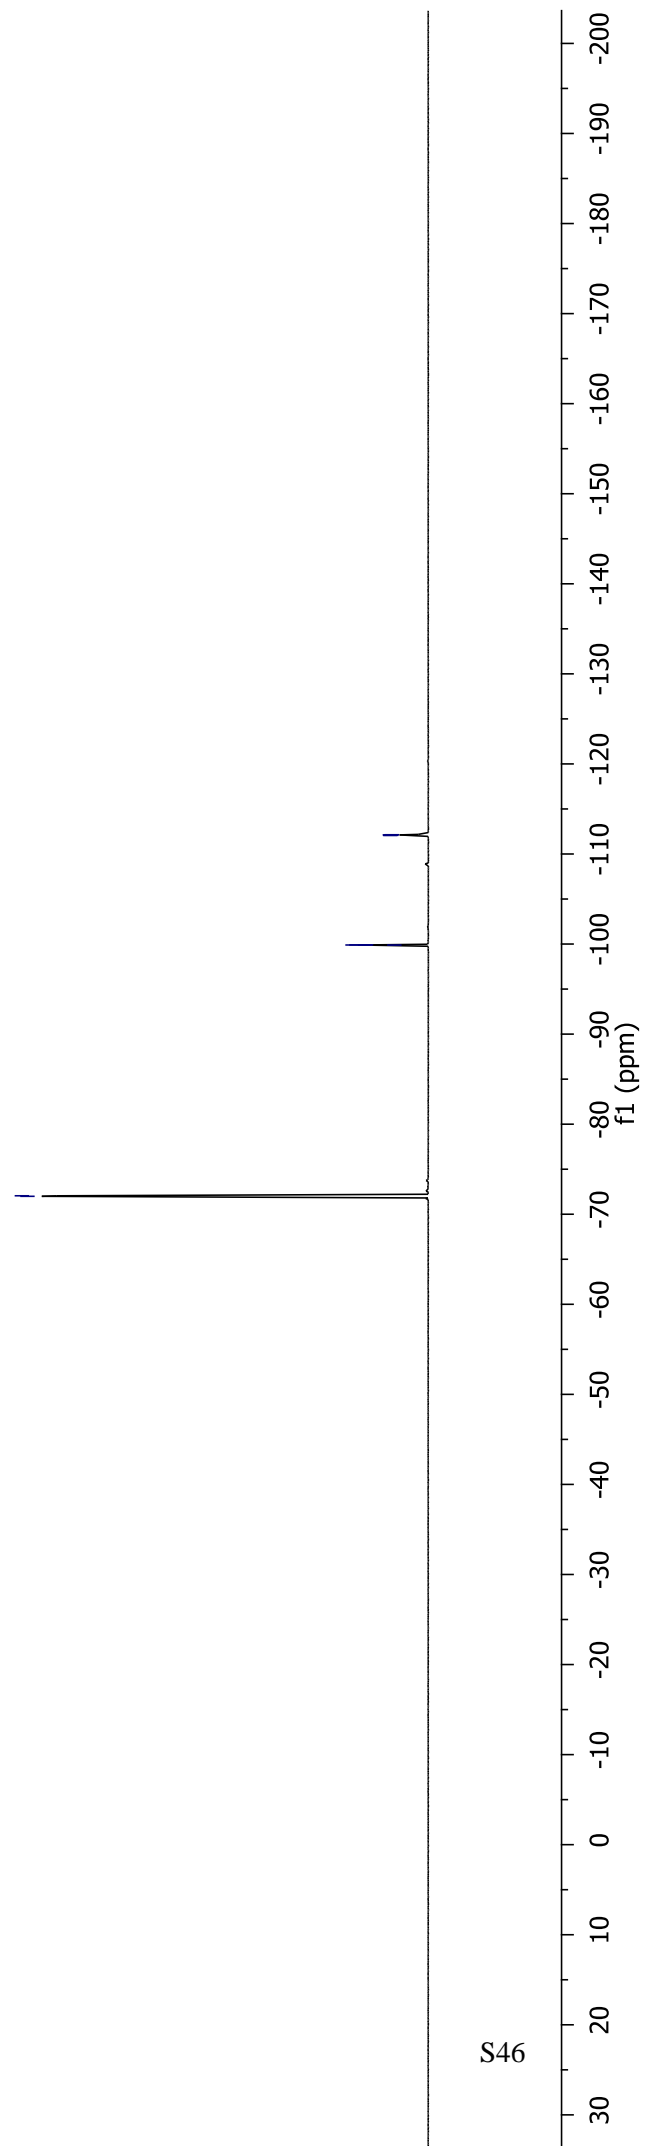

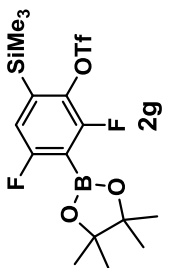

— 29.14

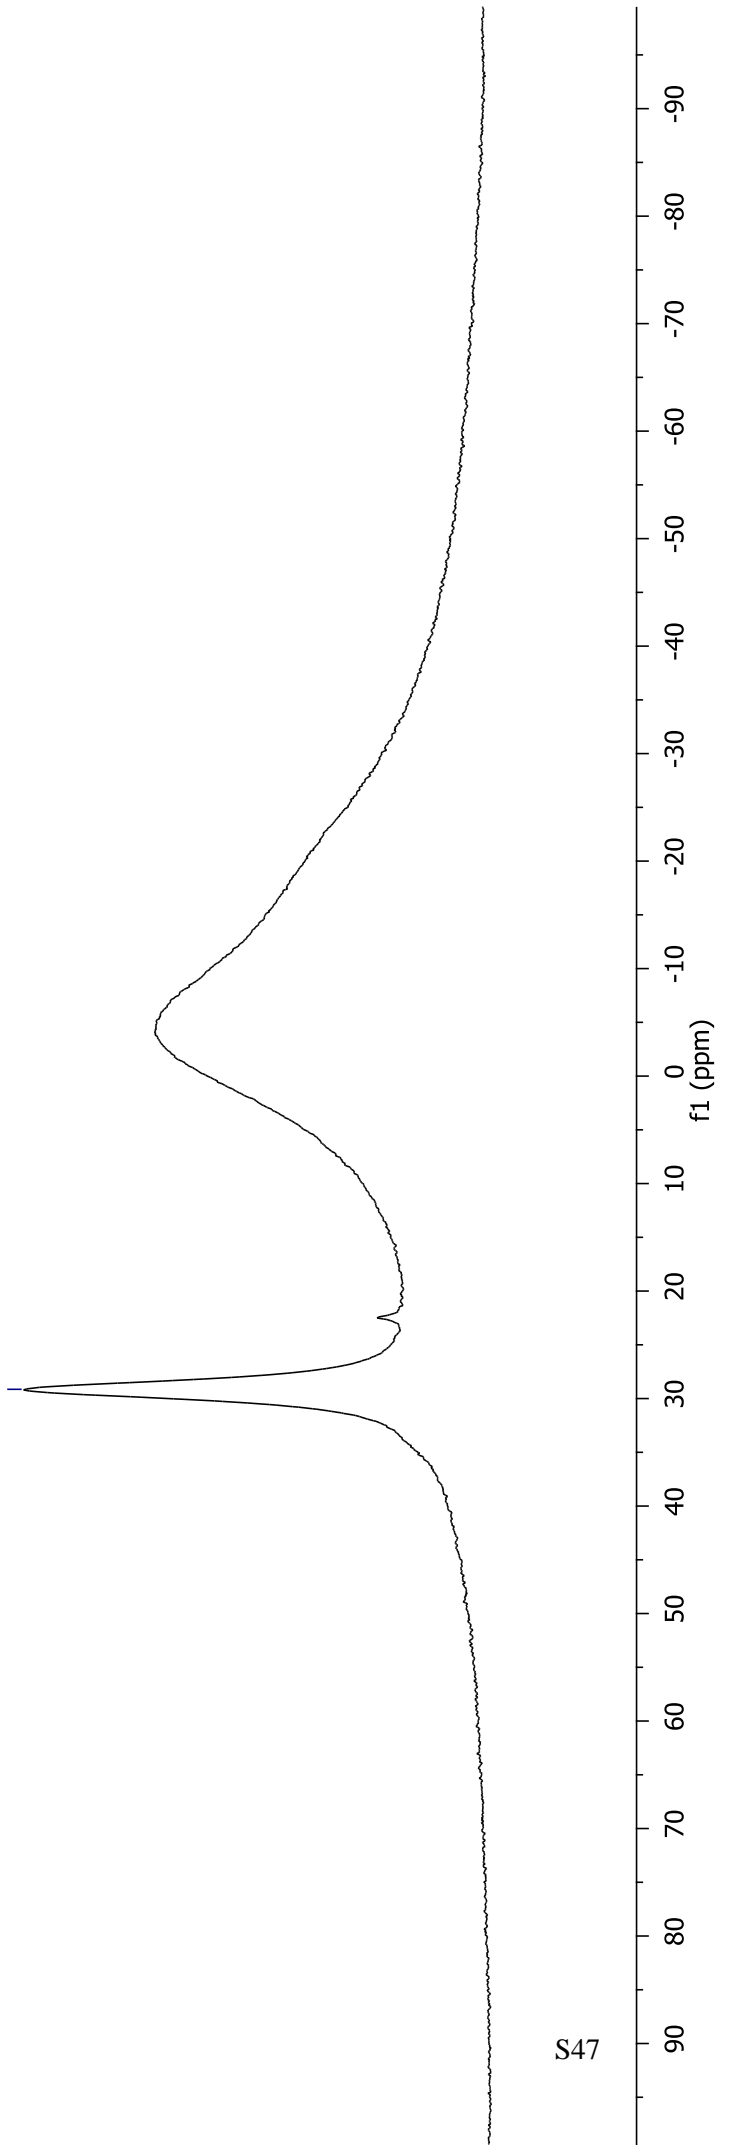



ed145-02\_purif\_8 PROTON\_01

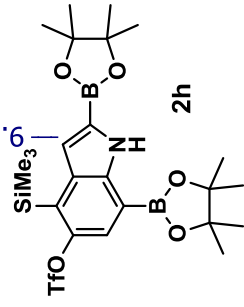

1.09  
1.02  
0.95  
0.52

8.09  
7.74  
7.74

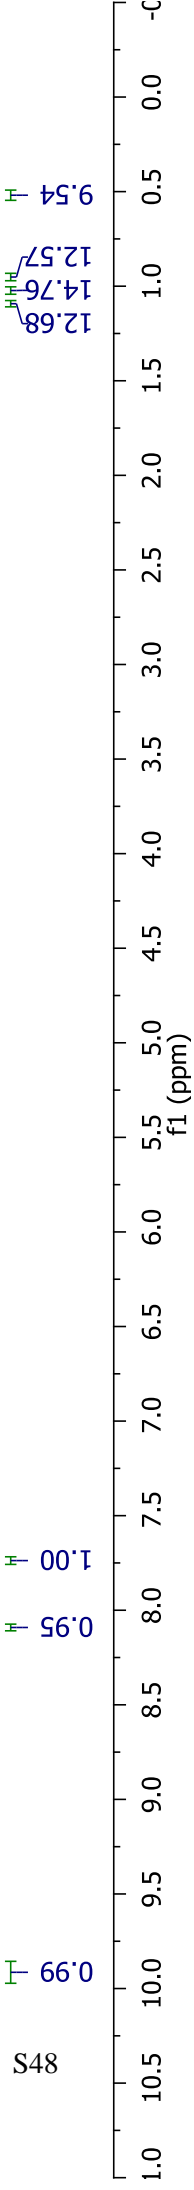

848

0.99

1.00

0.95

12.68

14.76

12.57

9.54



ed145-02\_purif\_FLUORINE\_01

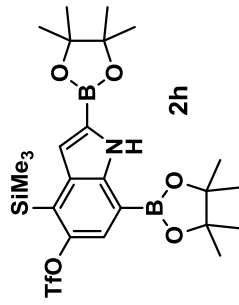

-73.50

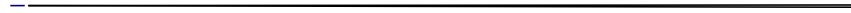

S50

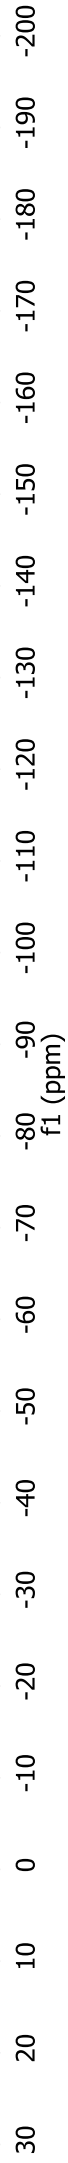

ed145-02\_ana\_BORON\_11\_01

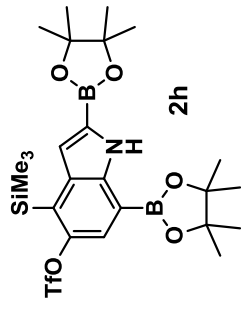

— 30.46

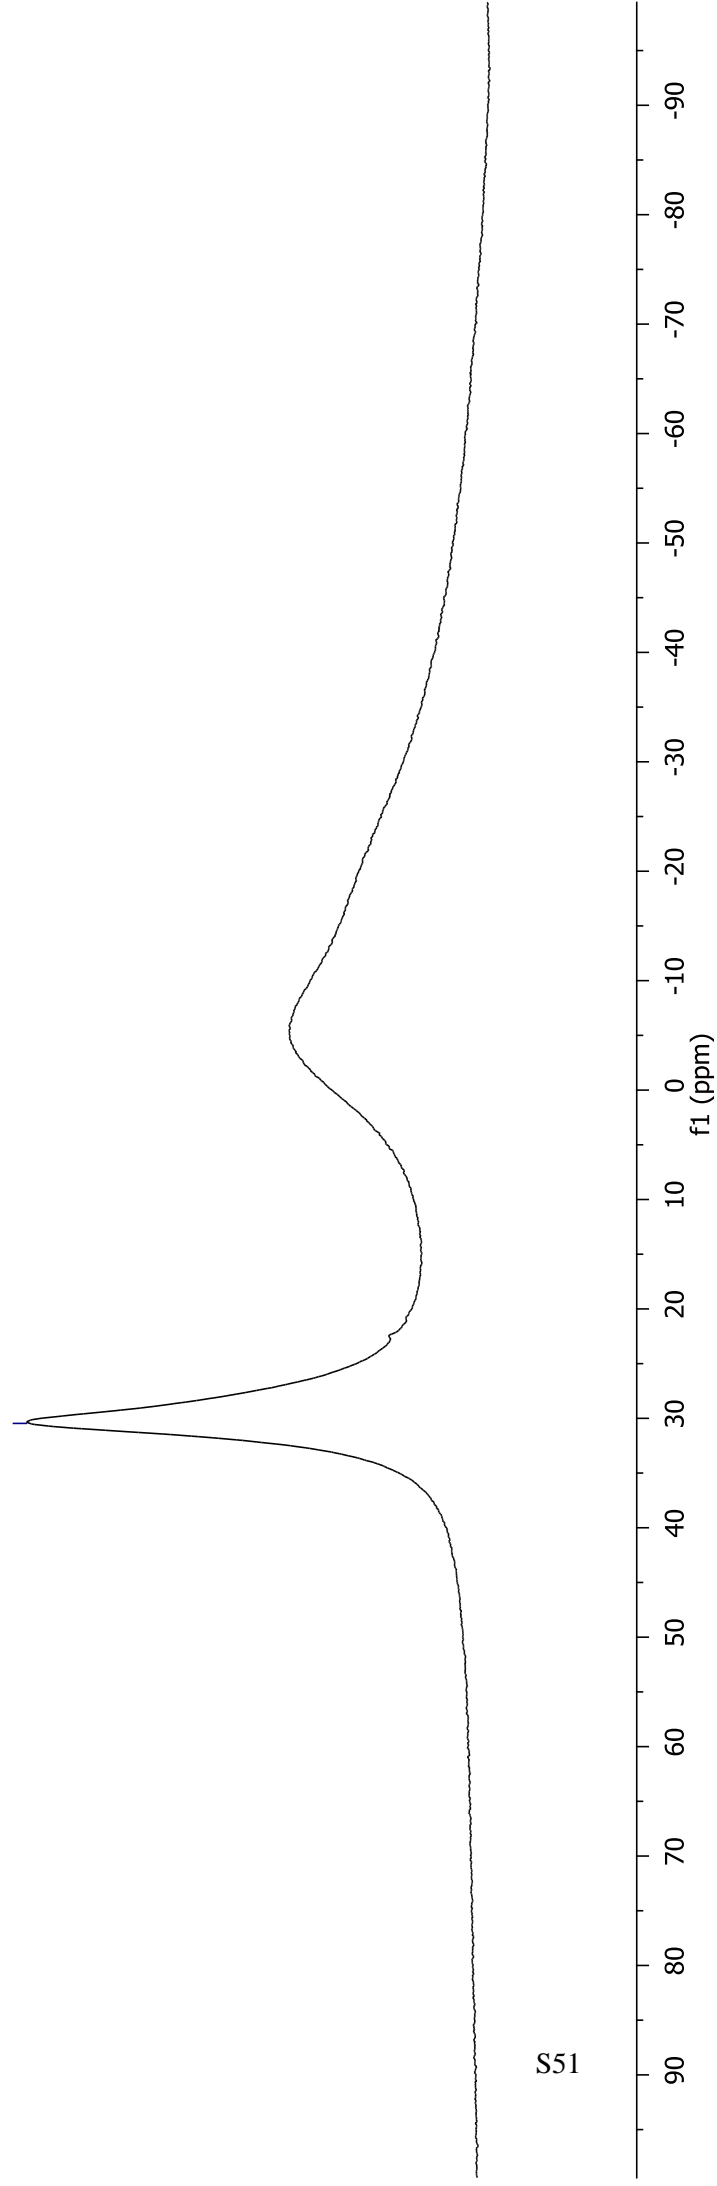

S51

552

1.0 10.0 9.5 9.0 8.5 8.0 7.5 7.0 6.5 6.0 5.5 5.0 4.5 4.0 3.5 3.0 2.5 2.0 1.5 1.0 0.5 0.0 -C

13.28  
3.28  
0.96  
0.27  
2.90  
0.47  
3.12  
1.08  
0.52  
1.00  
1.02

1.16  
1.12  
7.07  
7.06  
7.05  
7.03  
7.03  
6.88  
6.87  
6.86  
6.85  
6.85  
6.83  
6.78  
5.08  
5.03

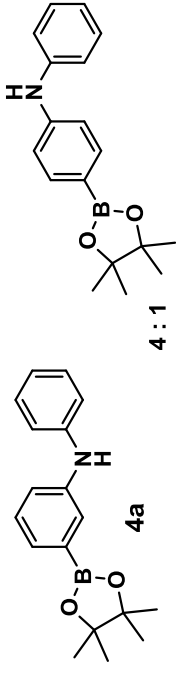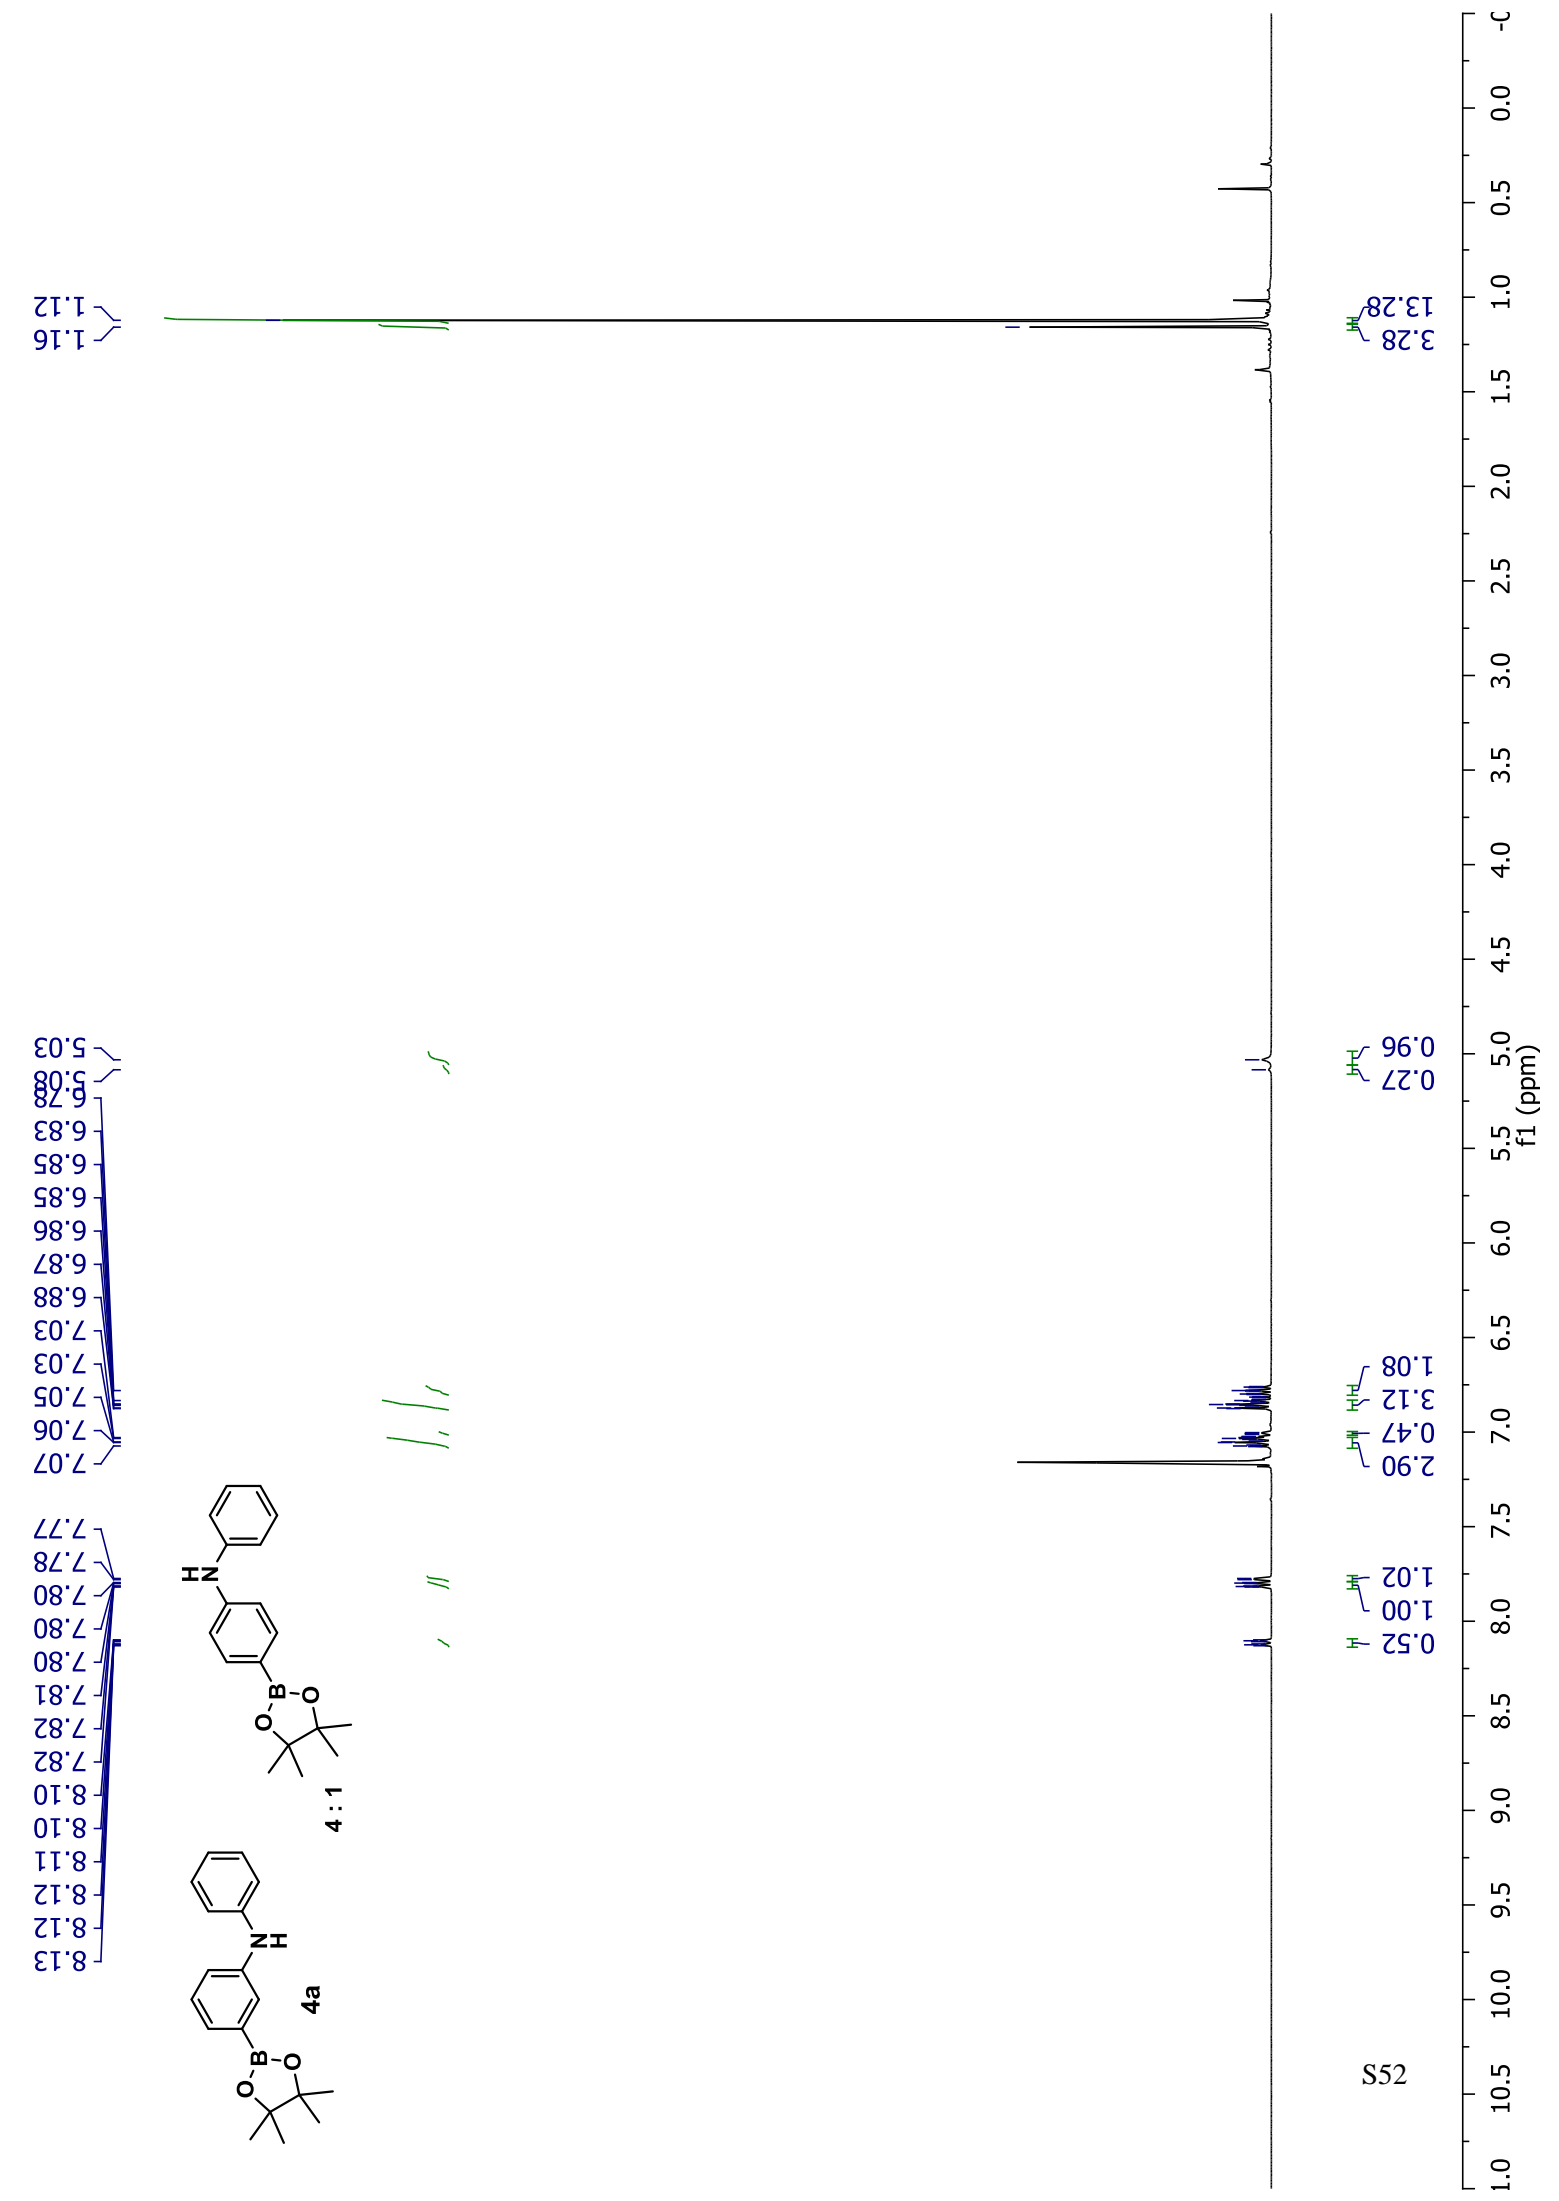

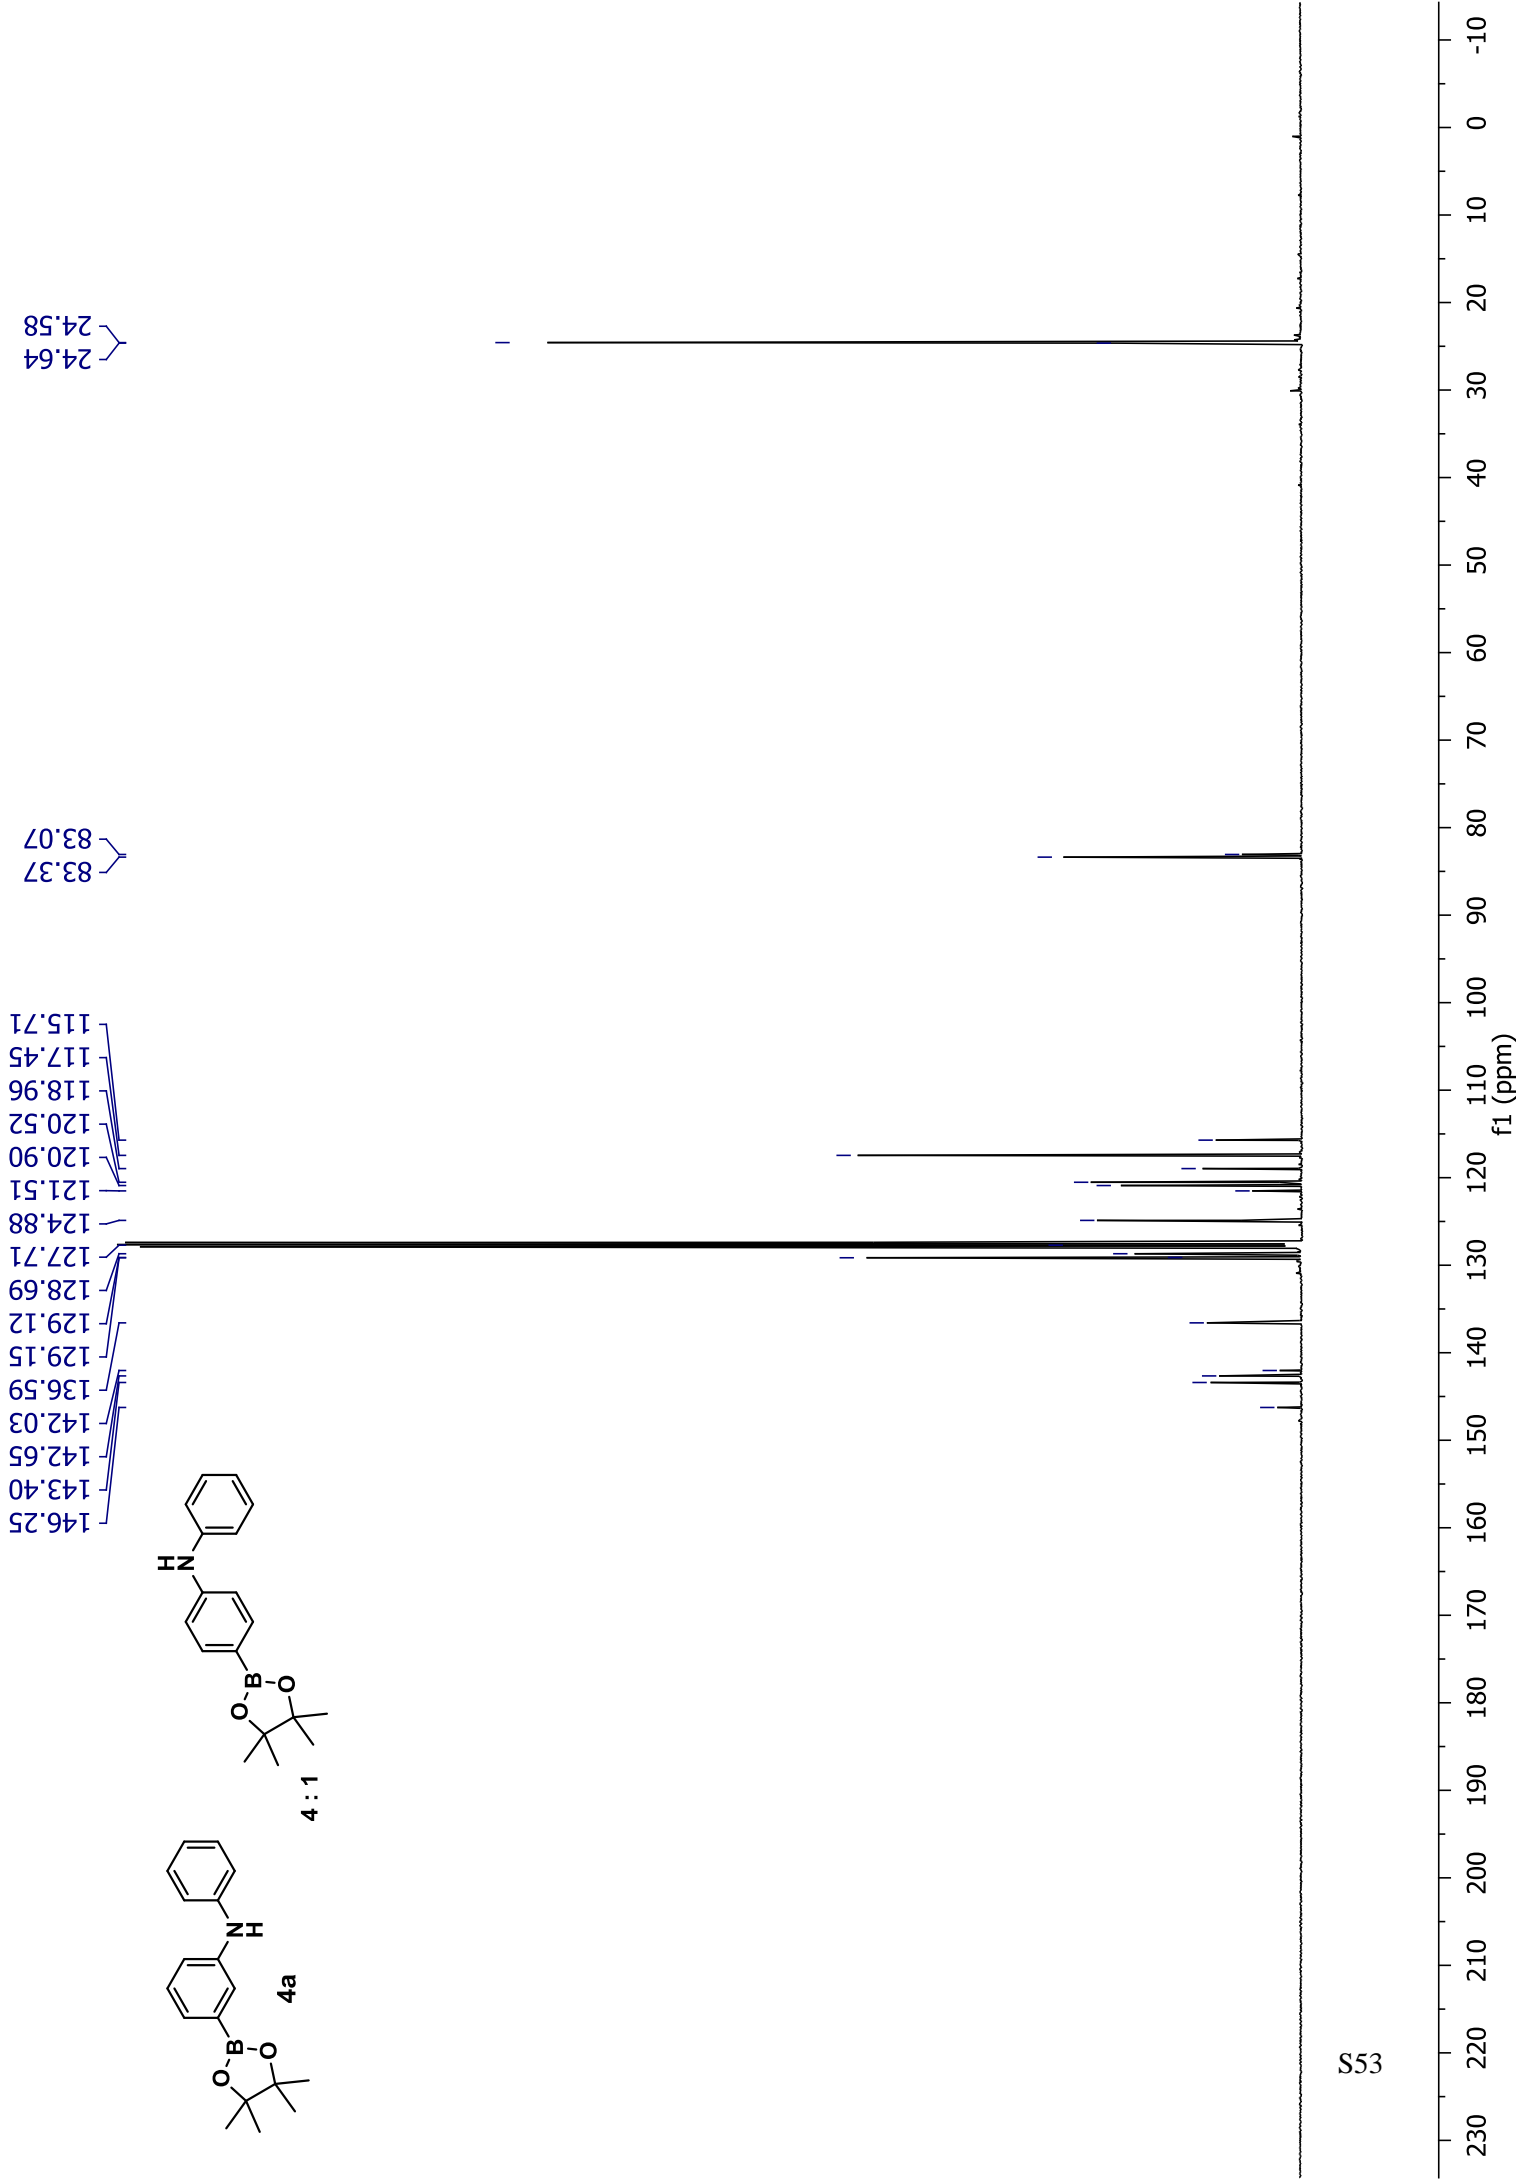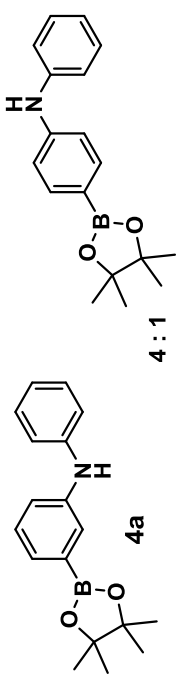

— 31.43

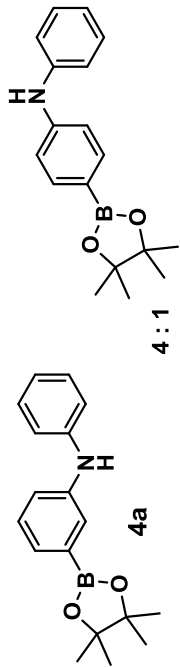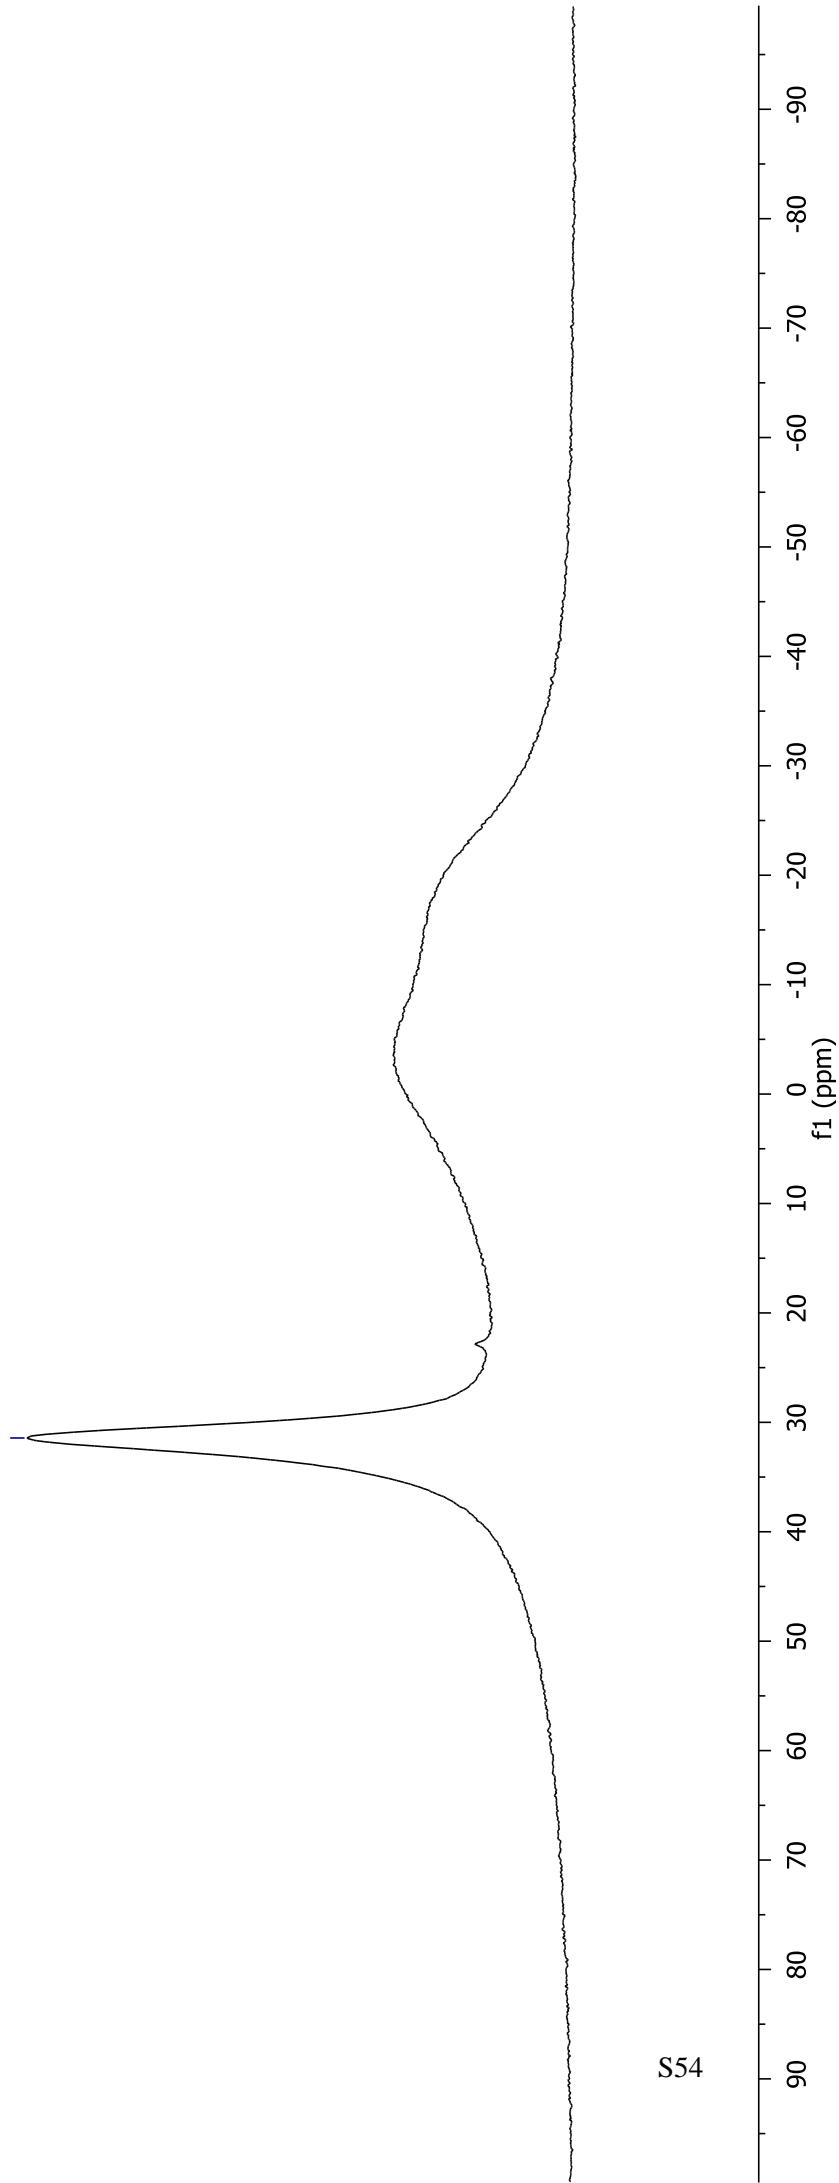

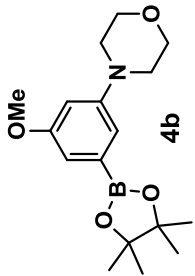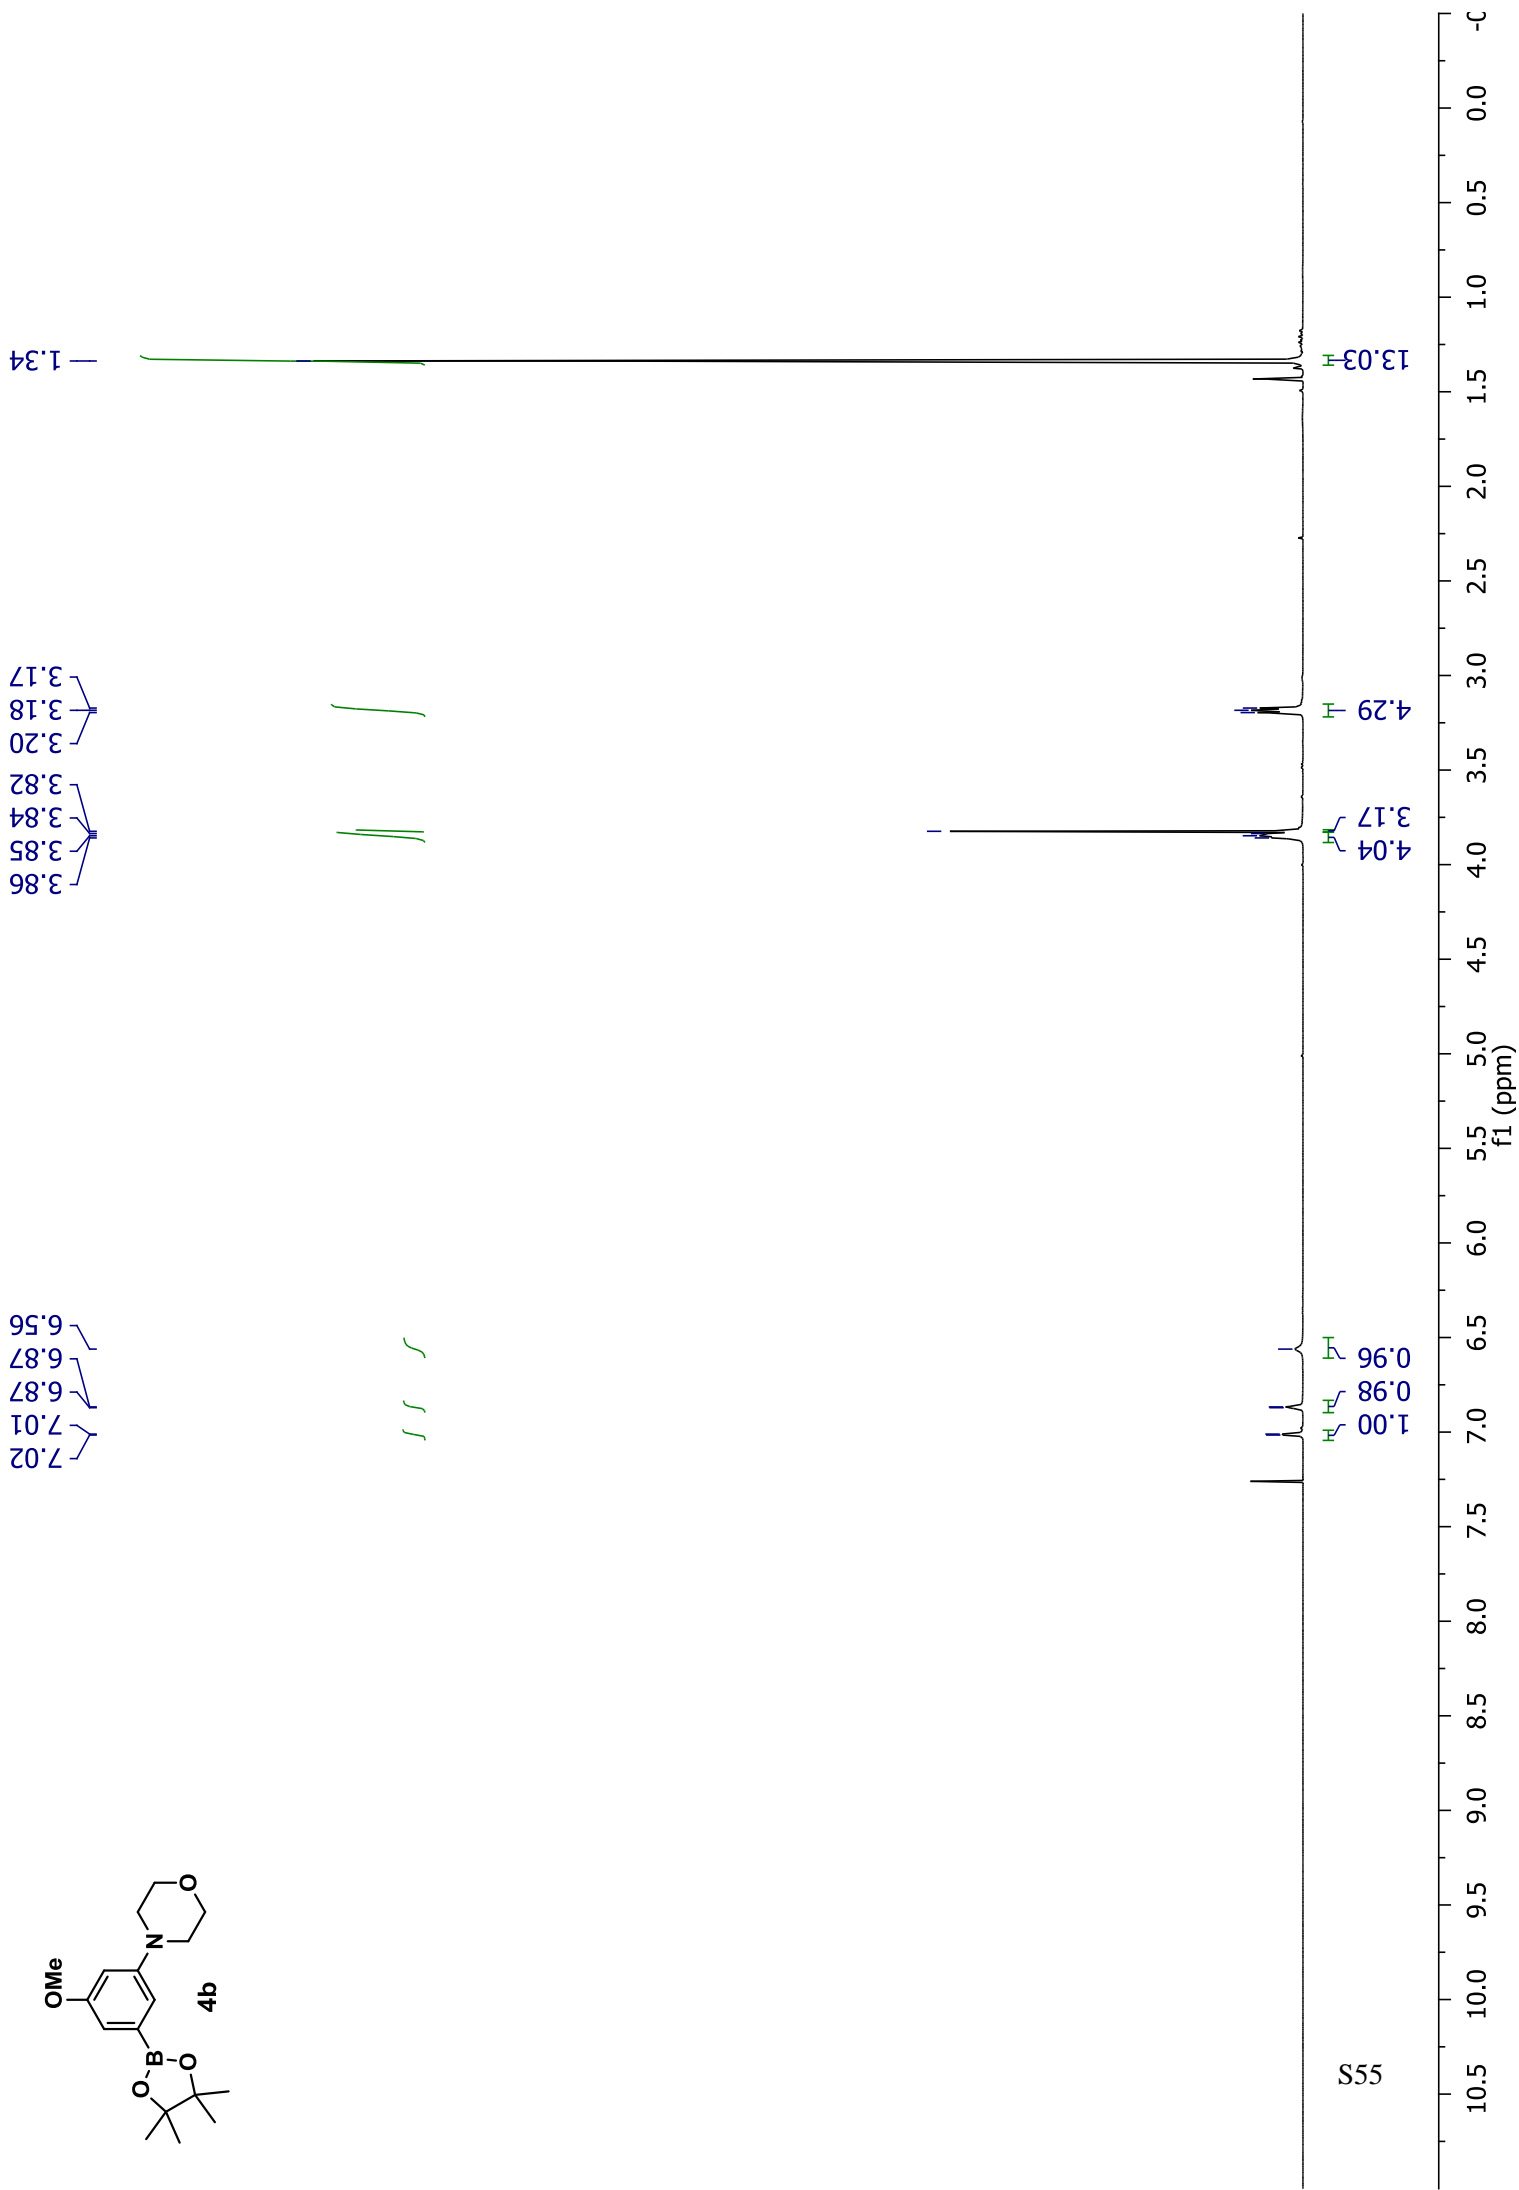



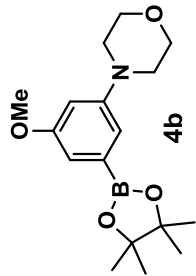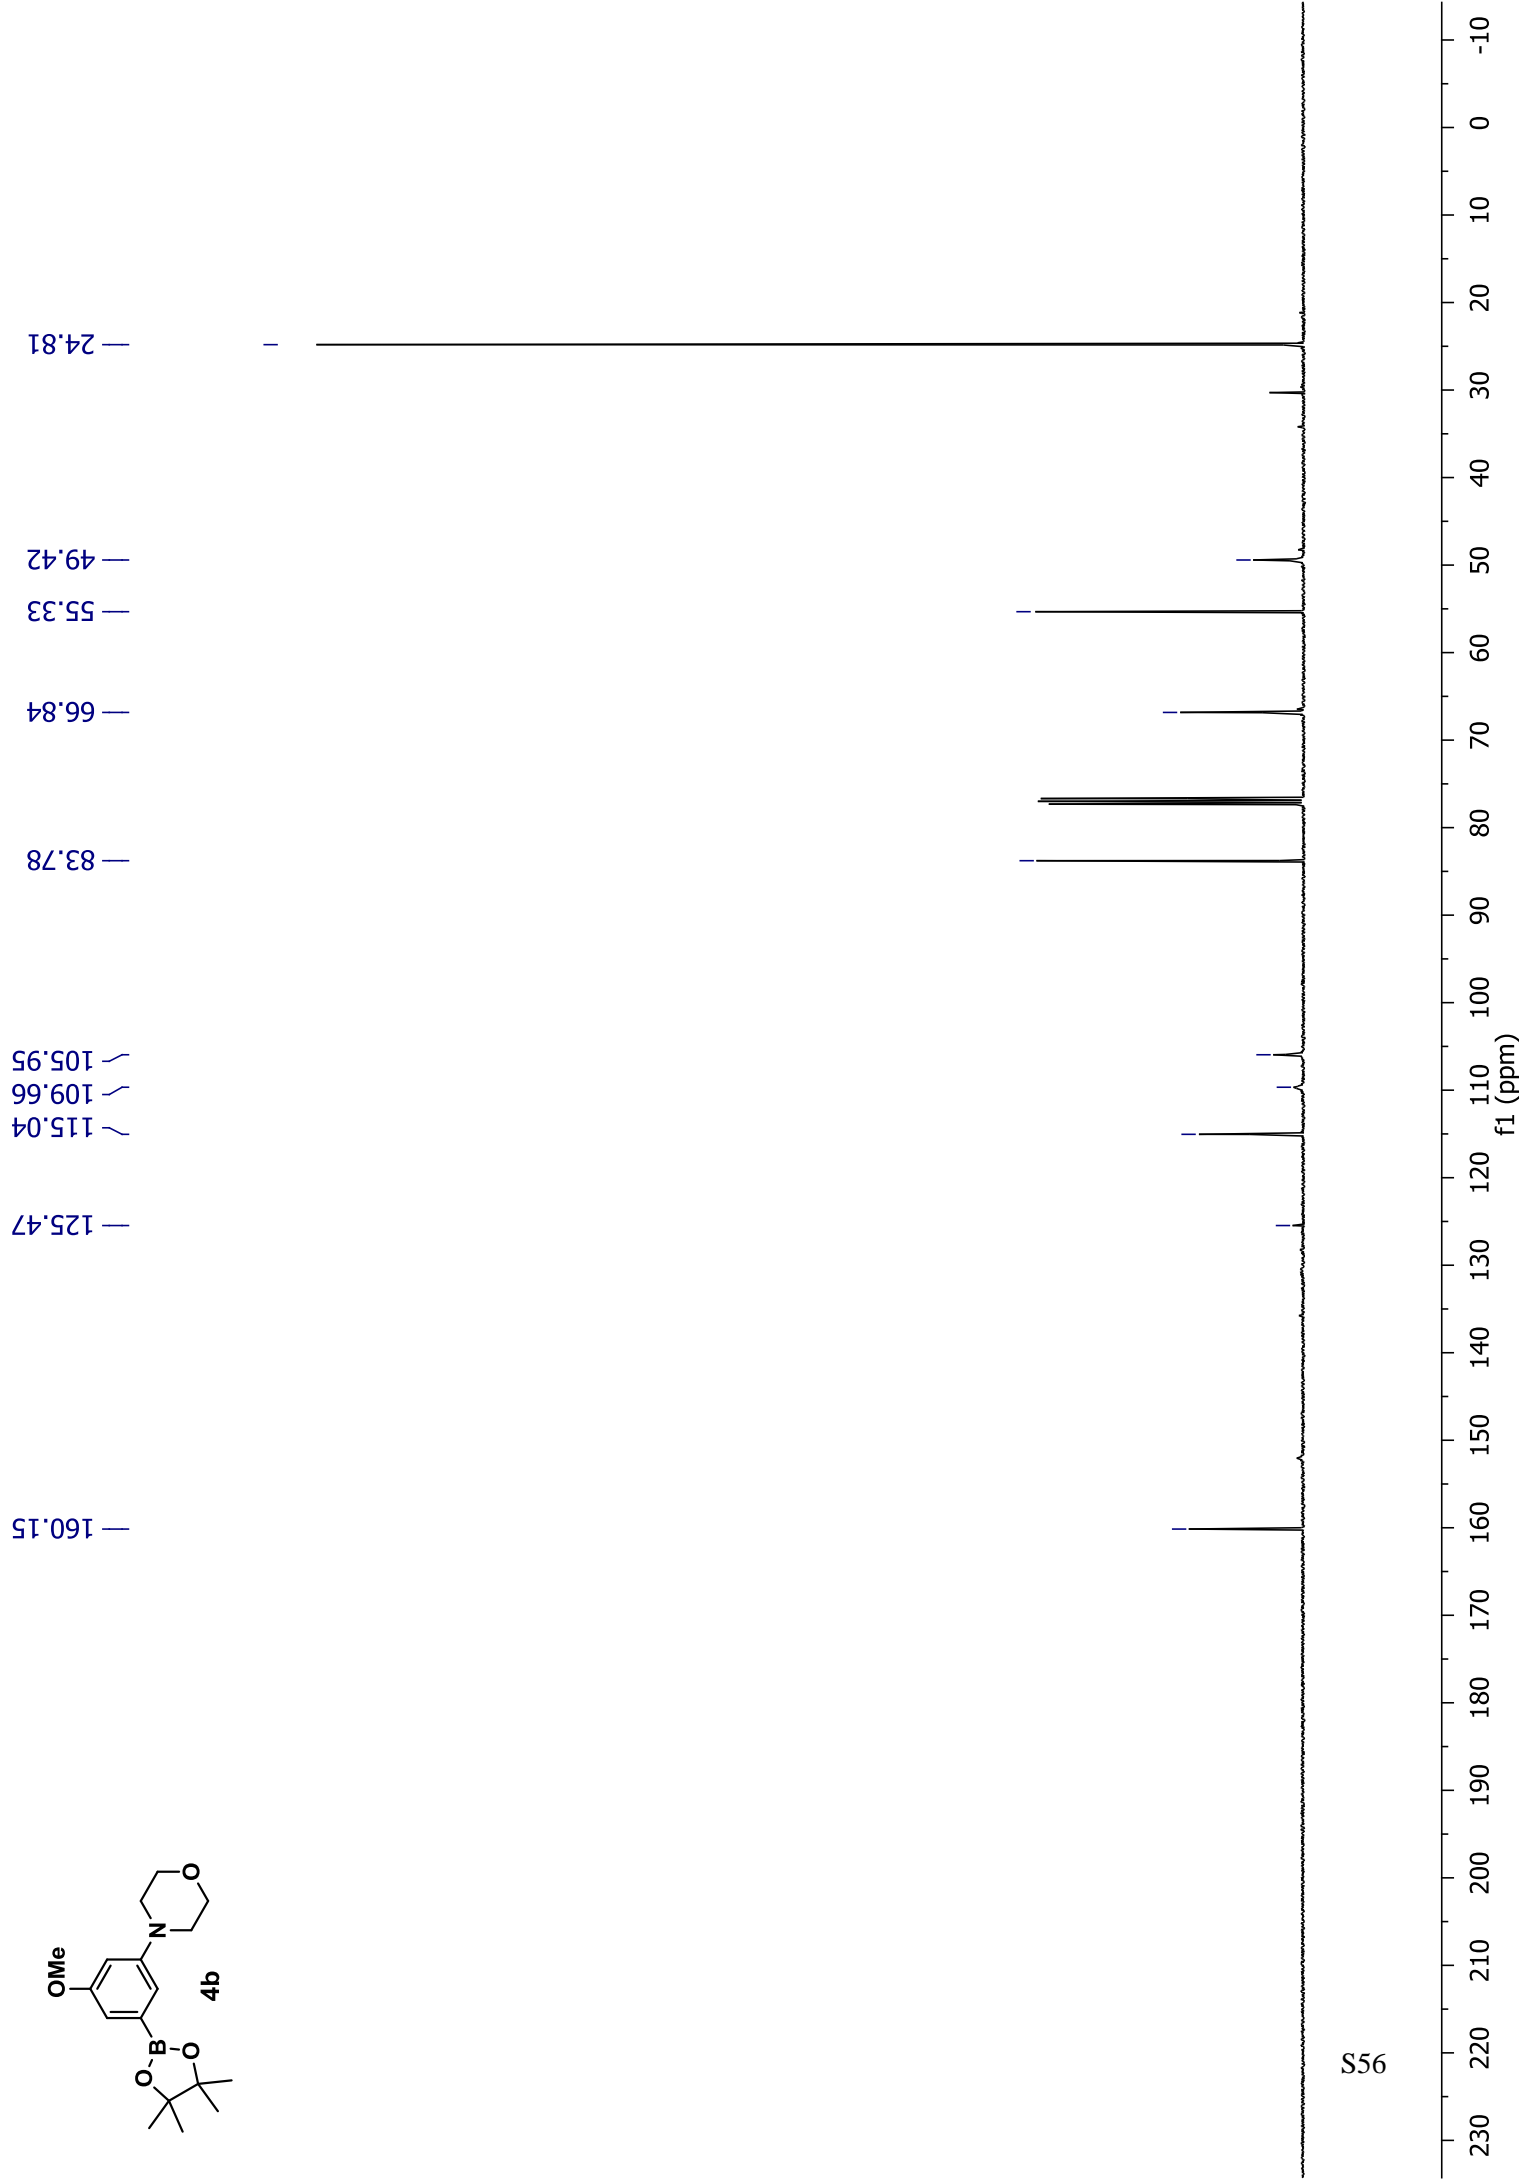

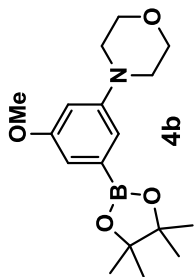

— 30.74

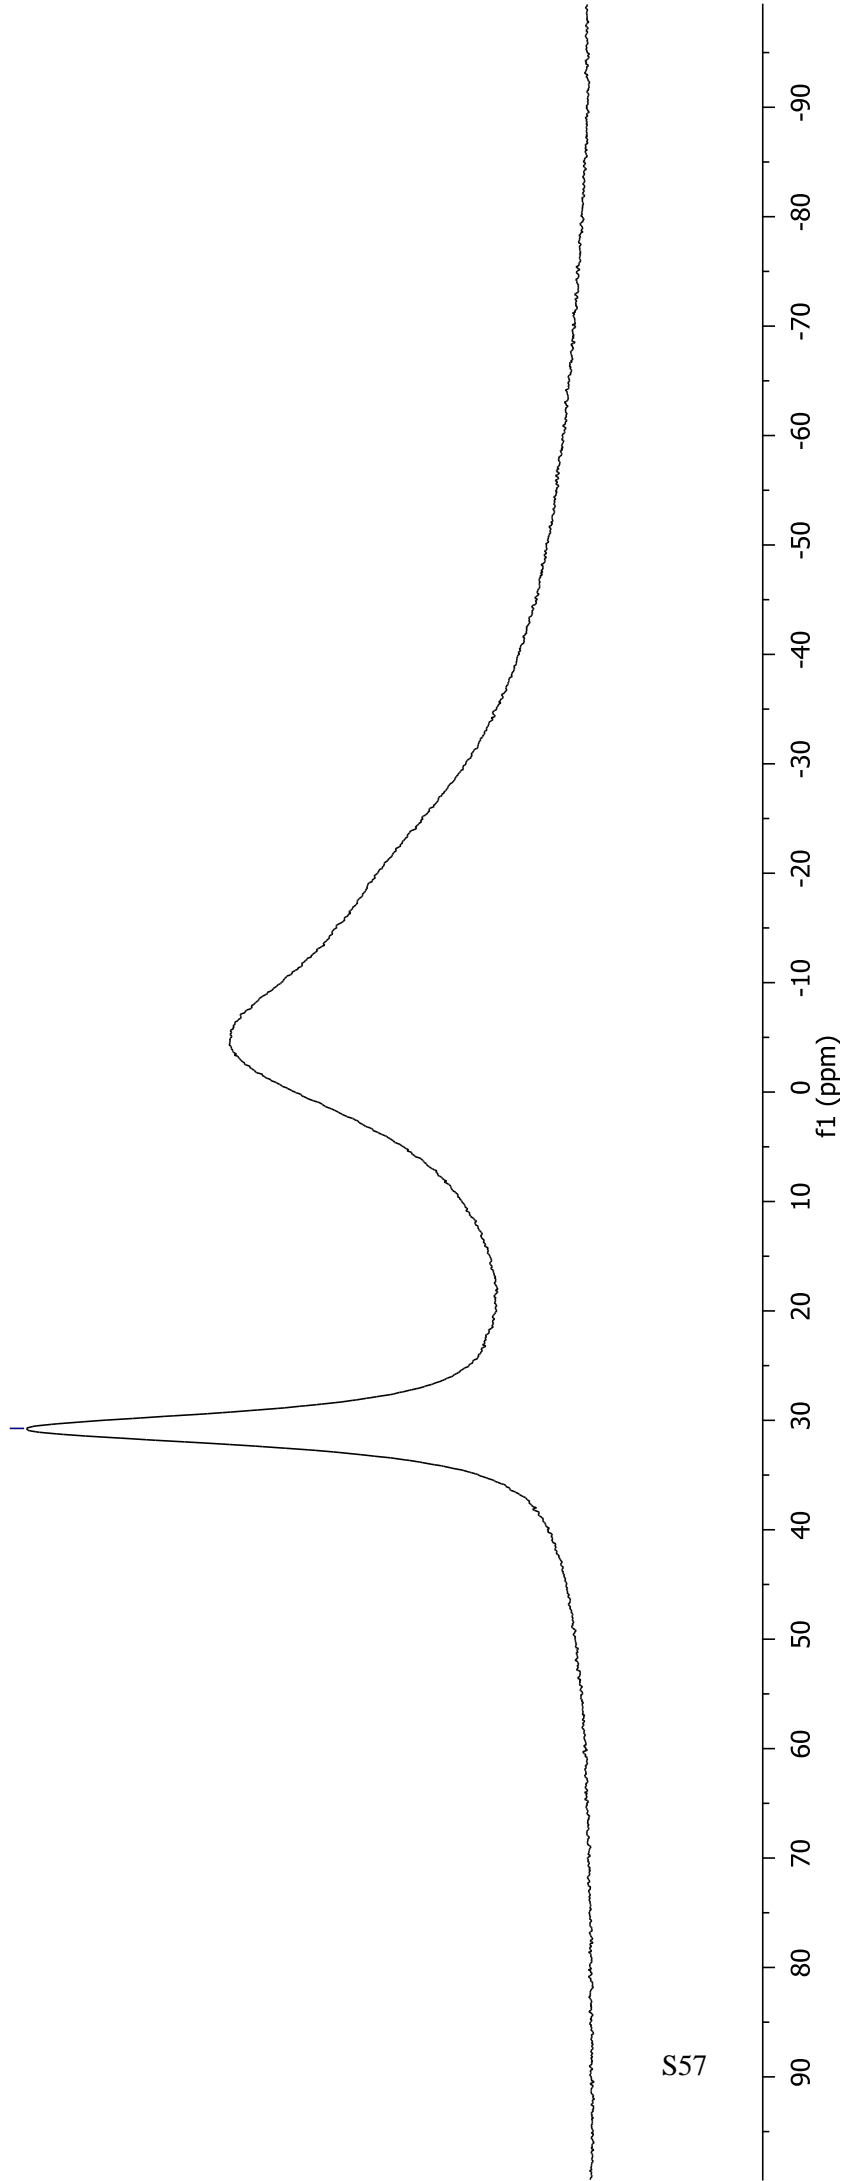

S57

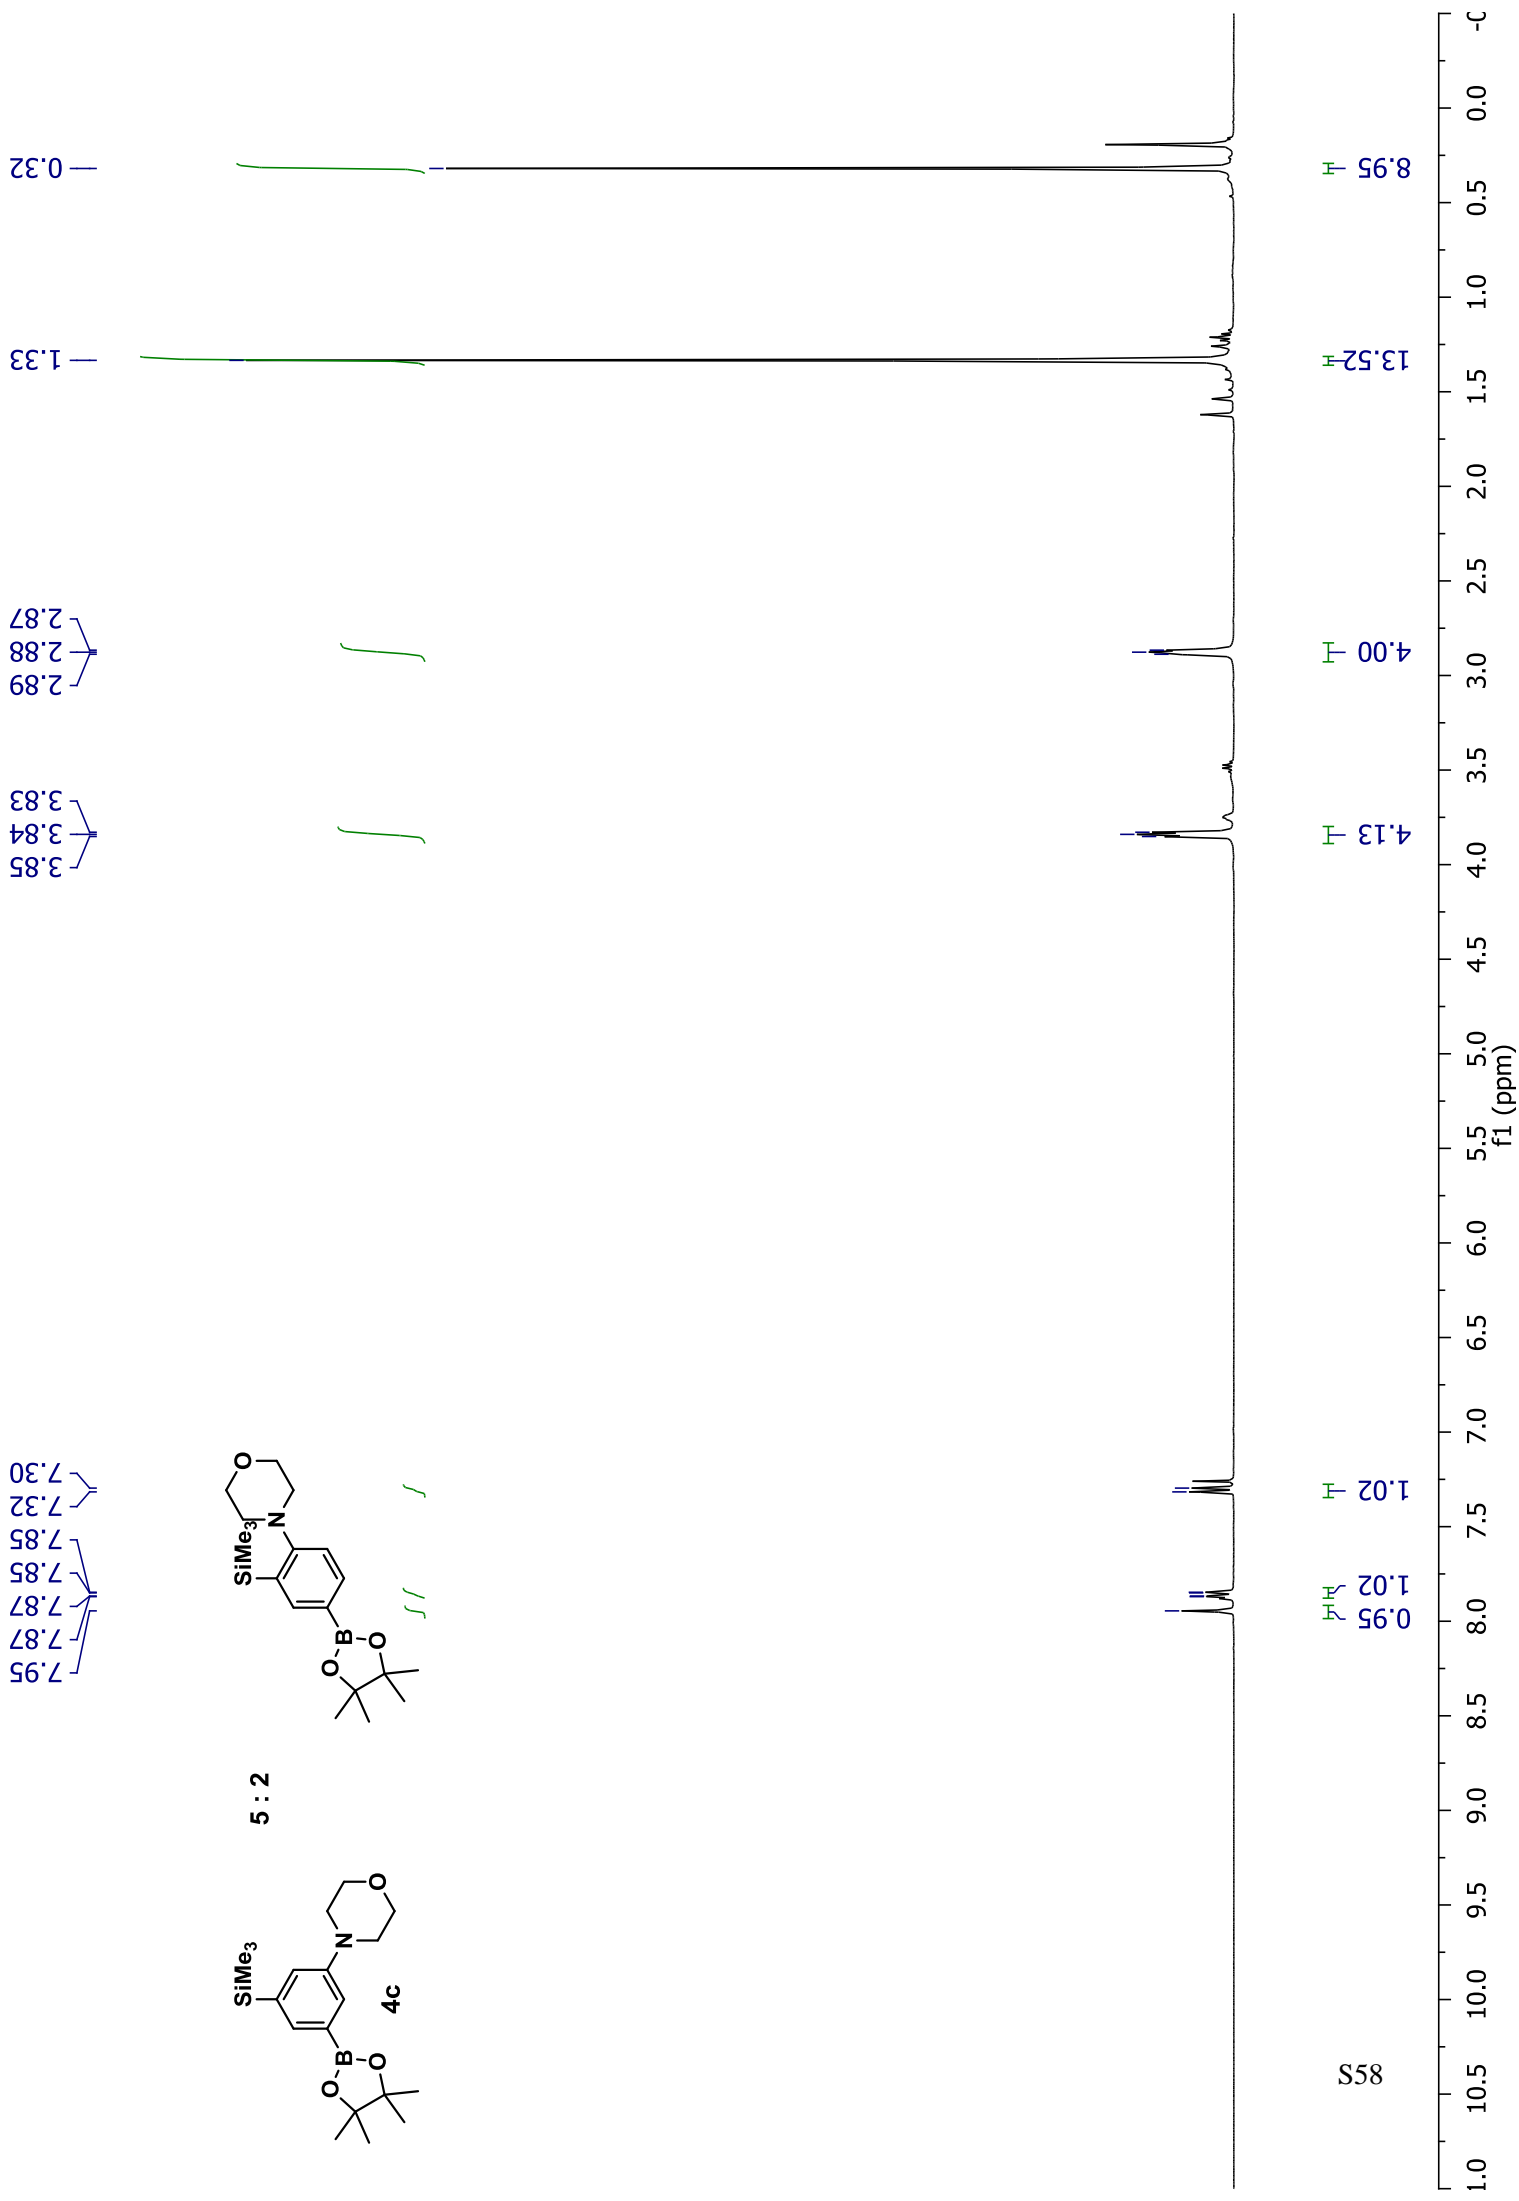

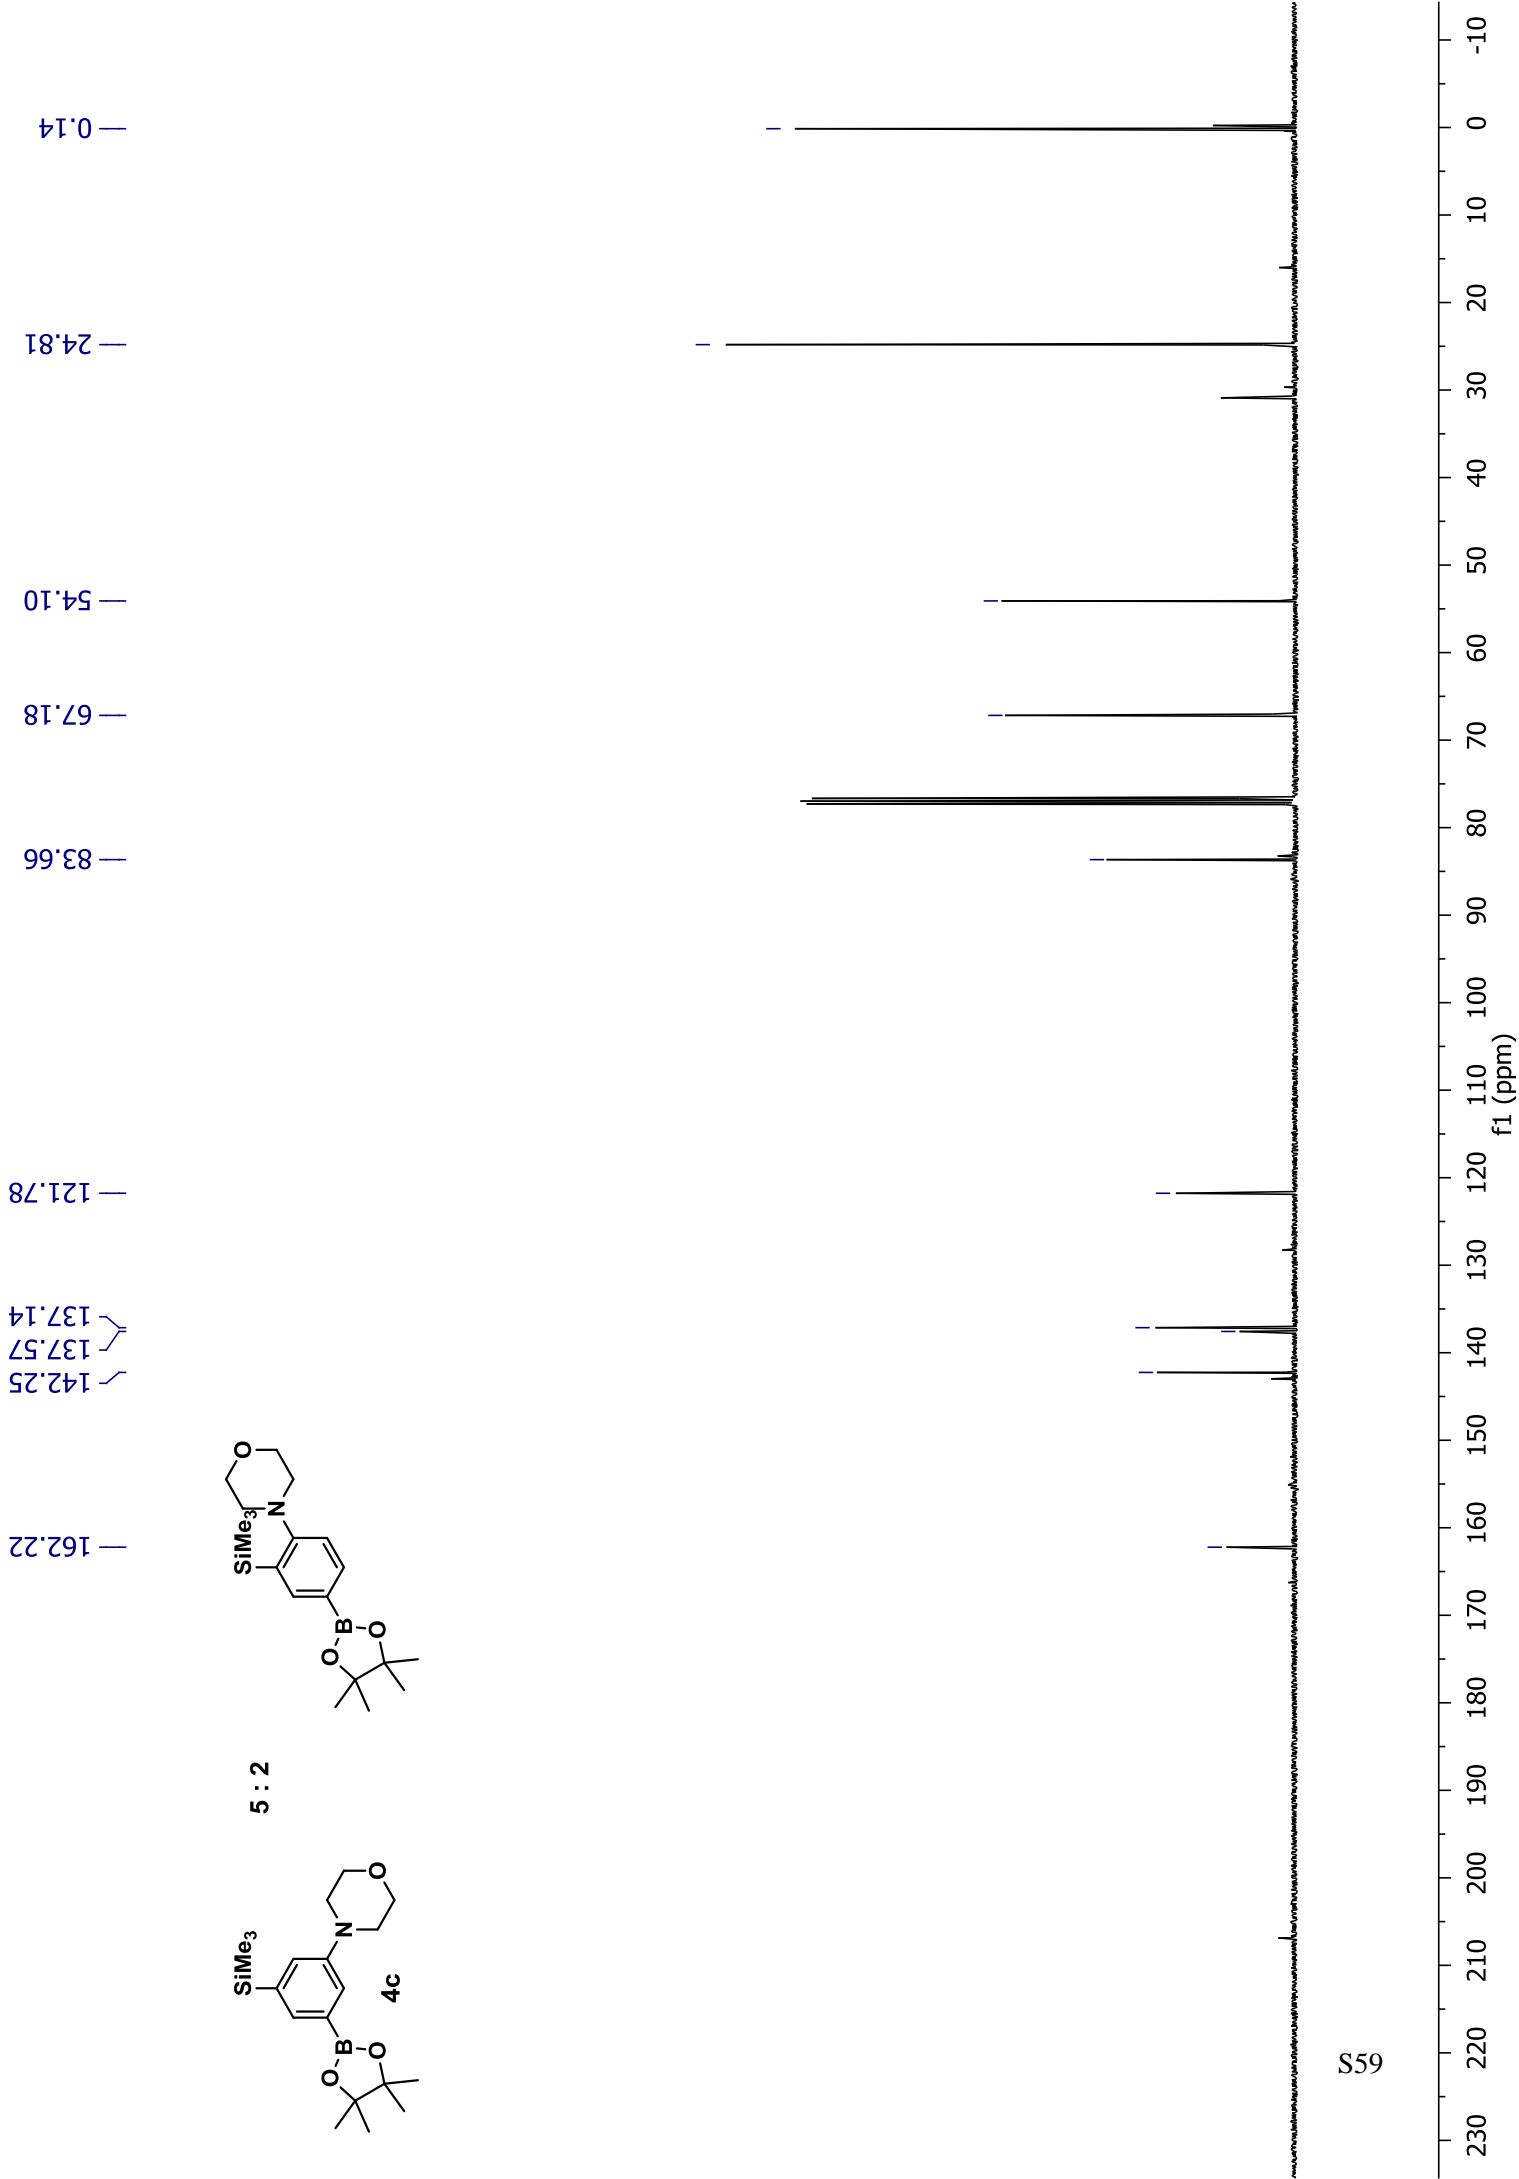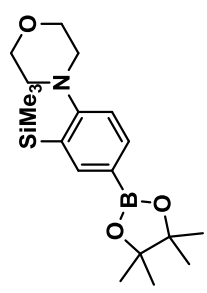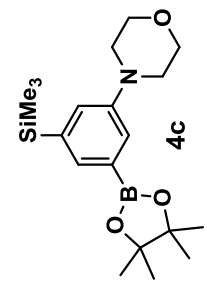

5 : 2

4c

— 30.88

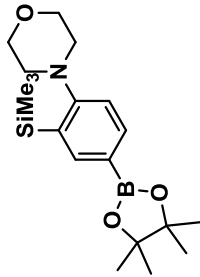

5 : 2

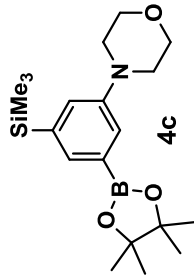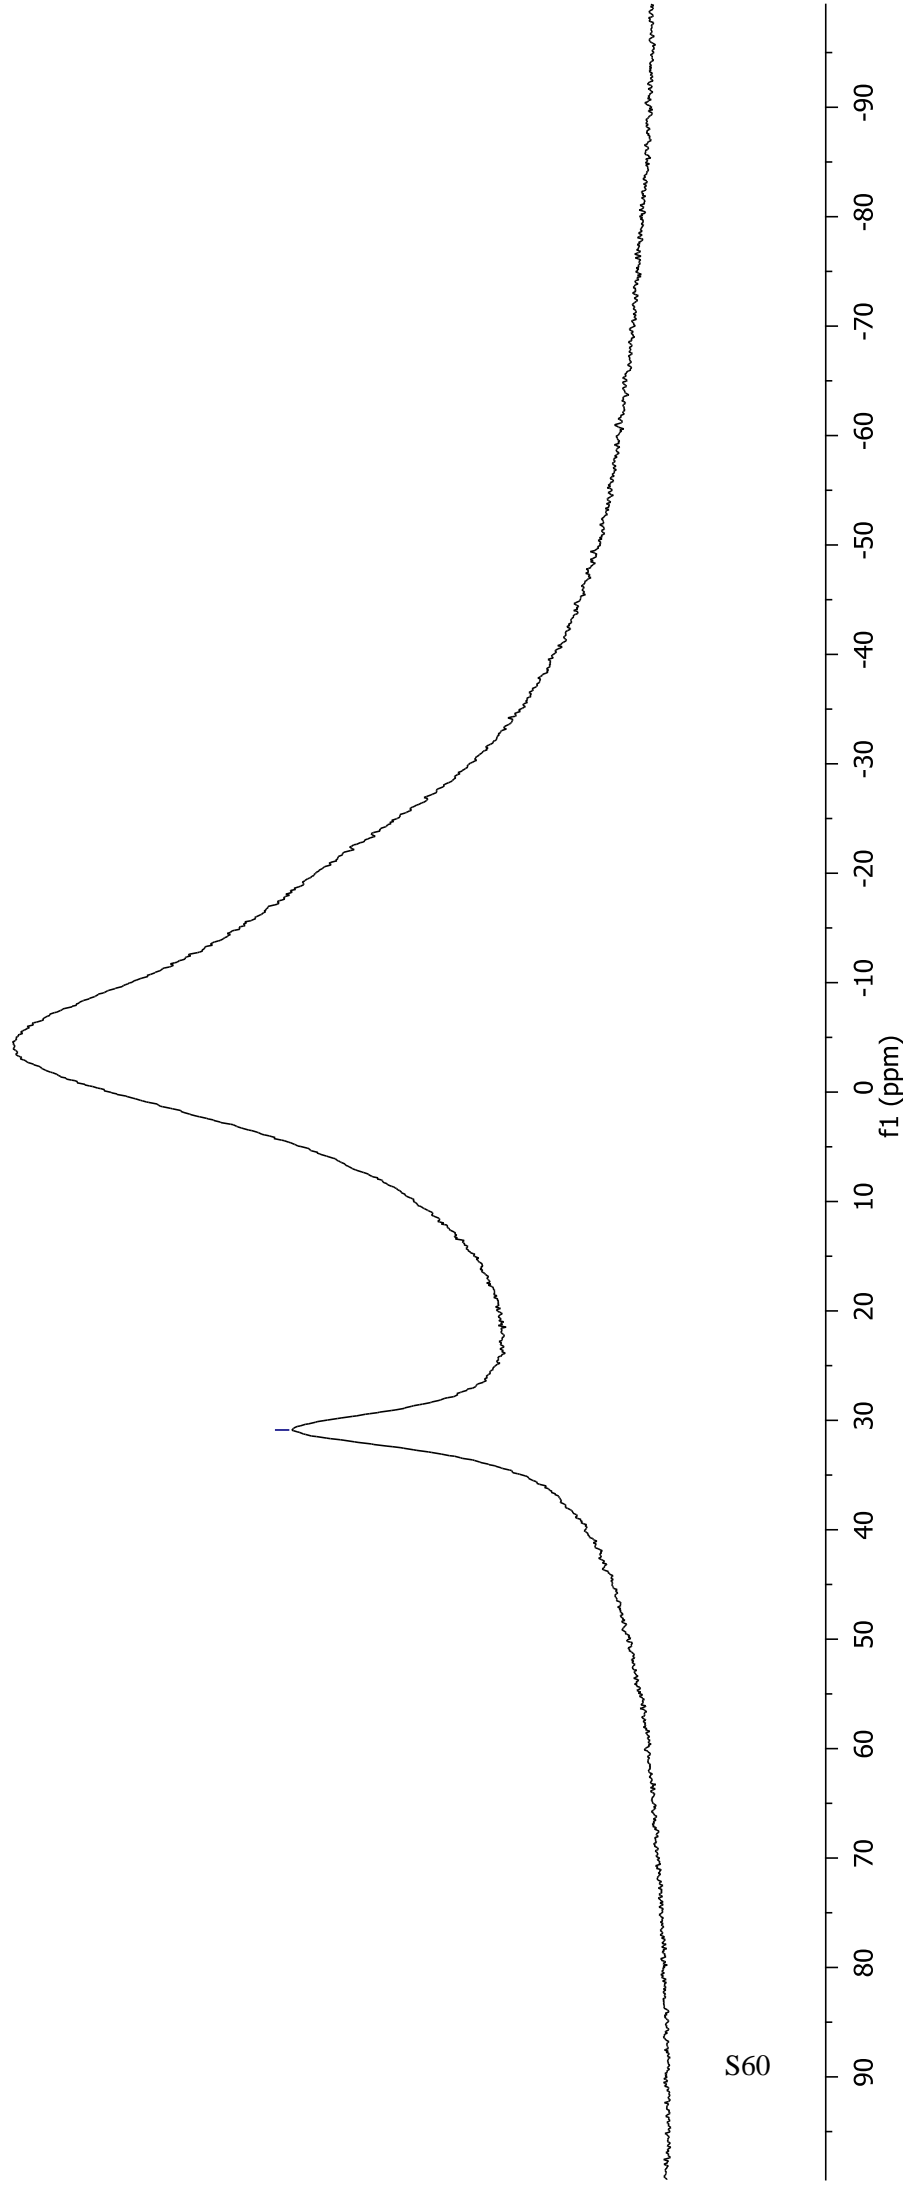

S60

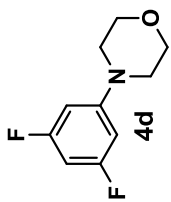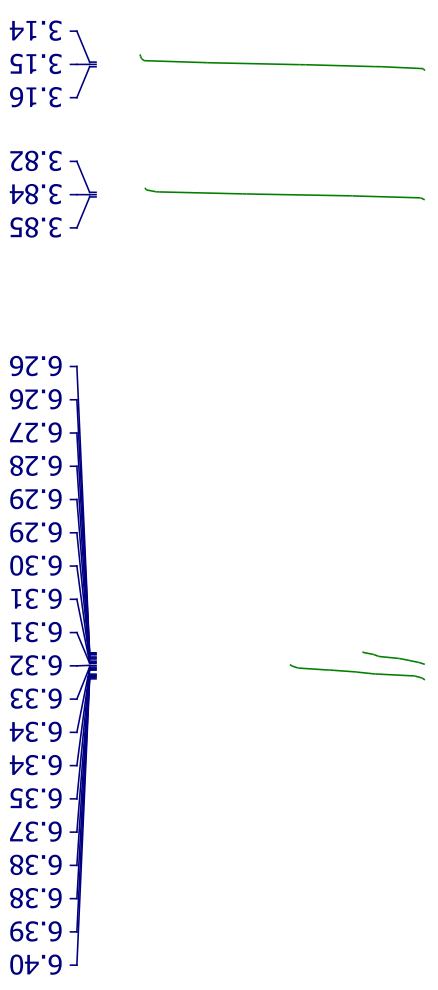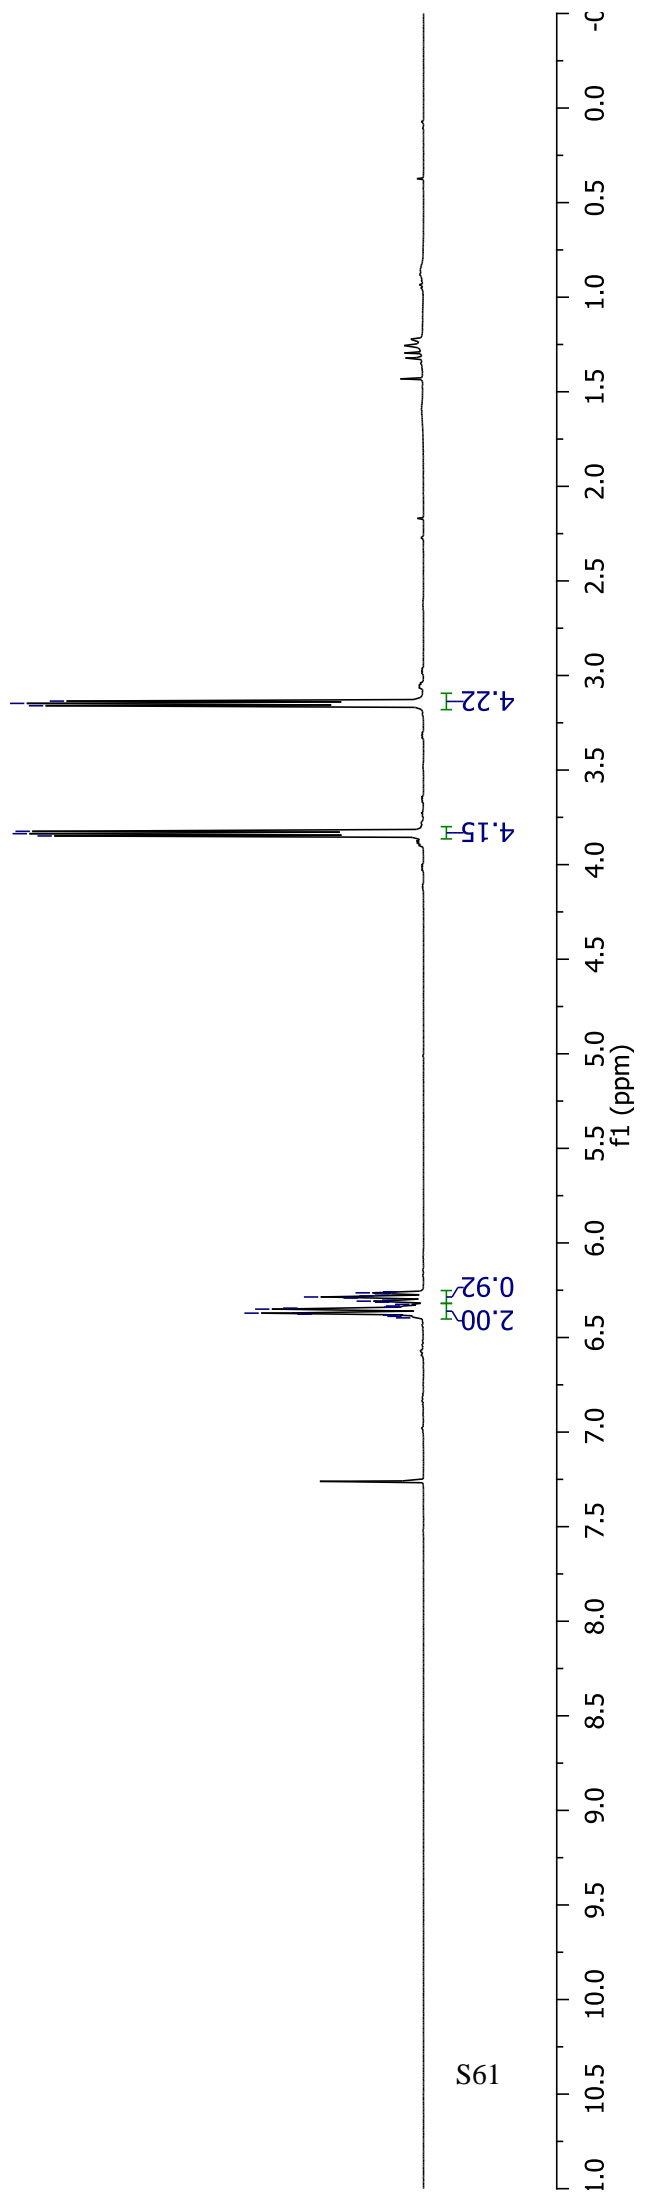

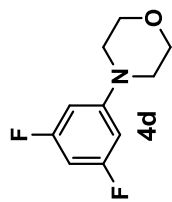

165.25  
165.10  
162.82  
162.67  
153.35  
153.23  
153.11

97.87  
97.78  
97.67  
97.58  
94.71  
94.45  
94.19

48.25

66.47

S62

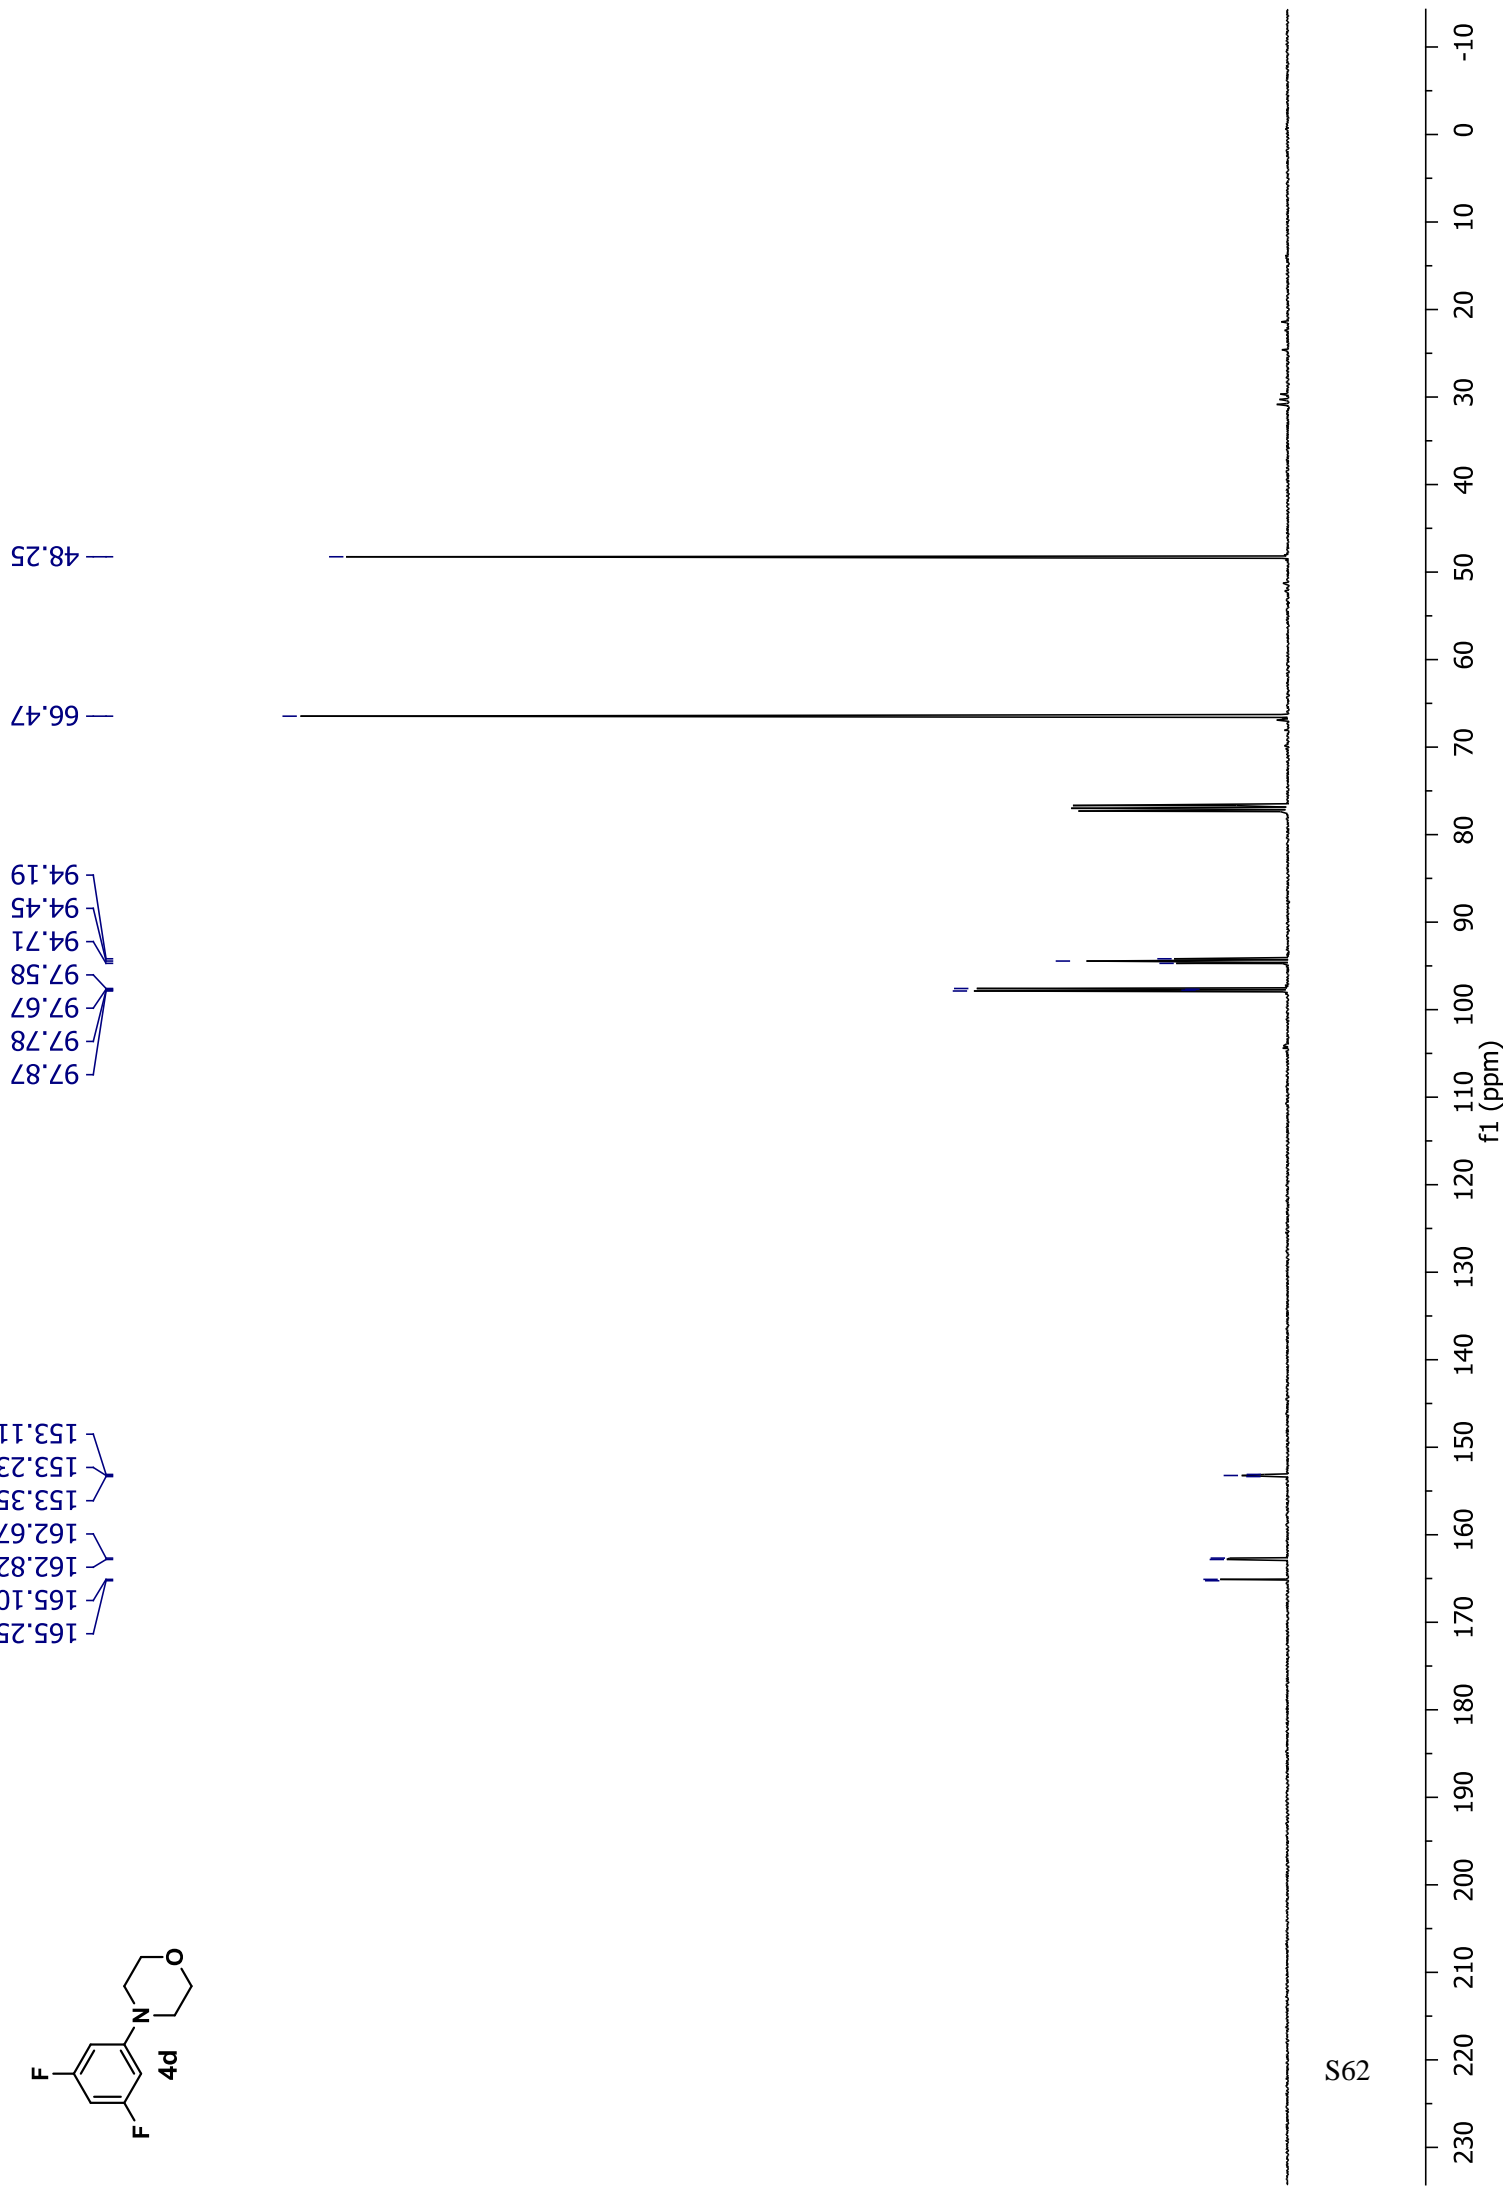

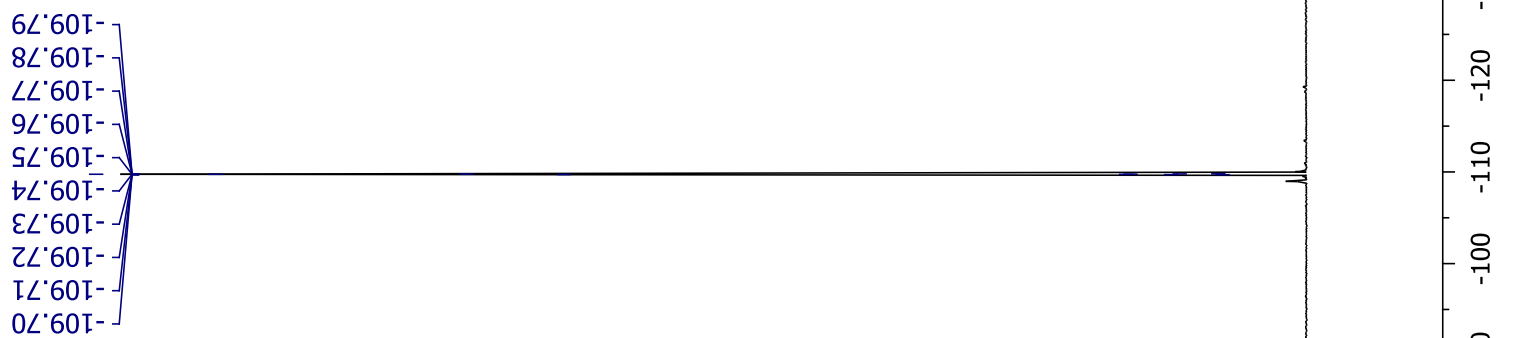



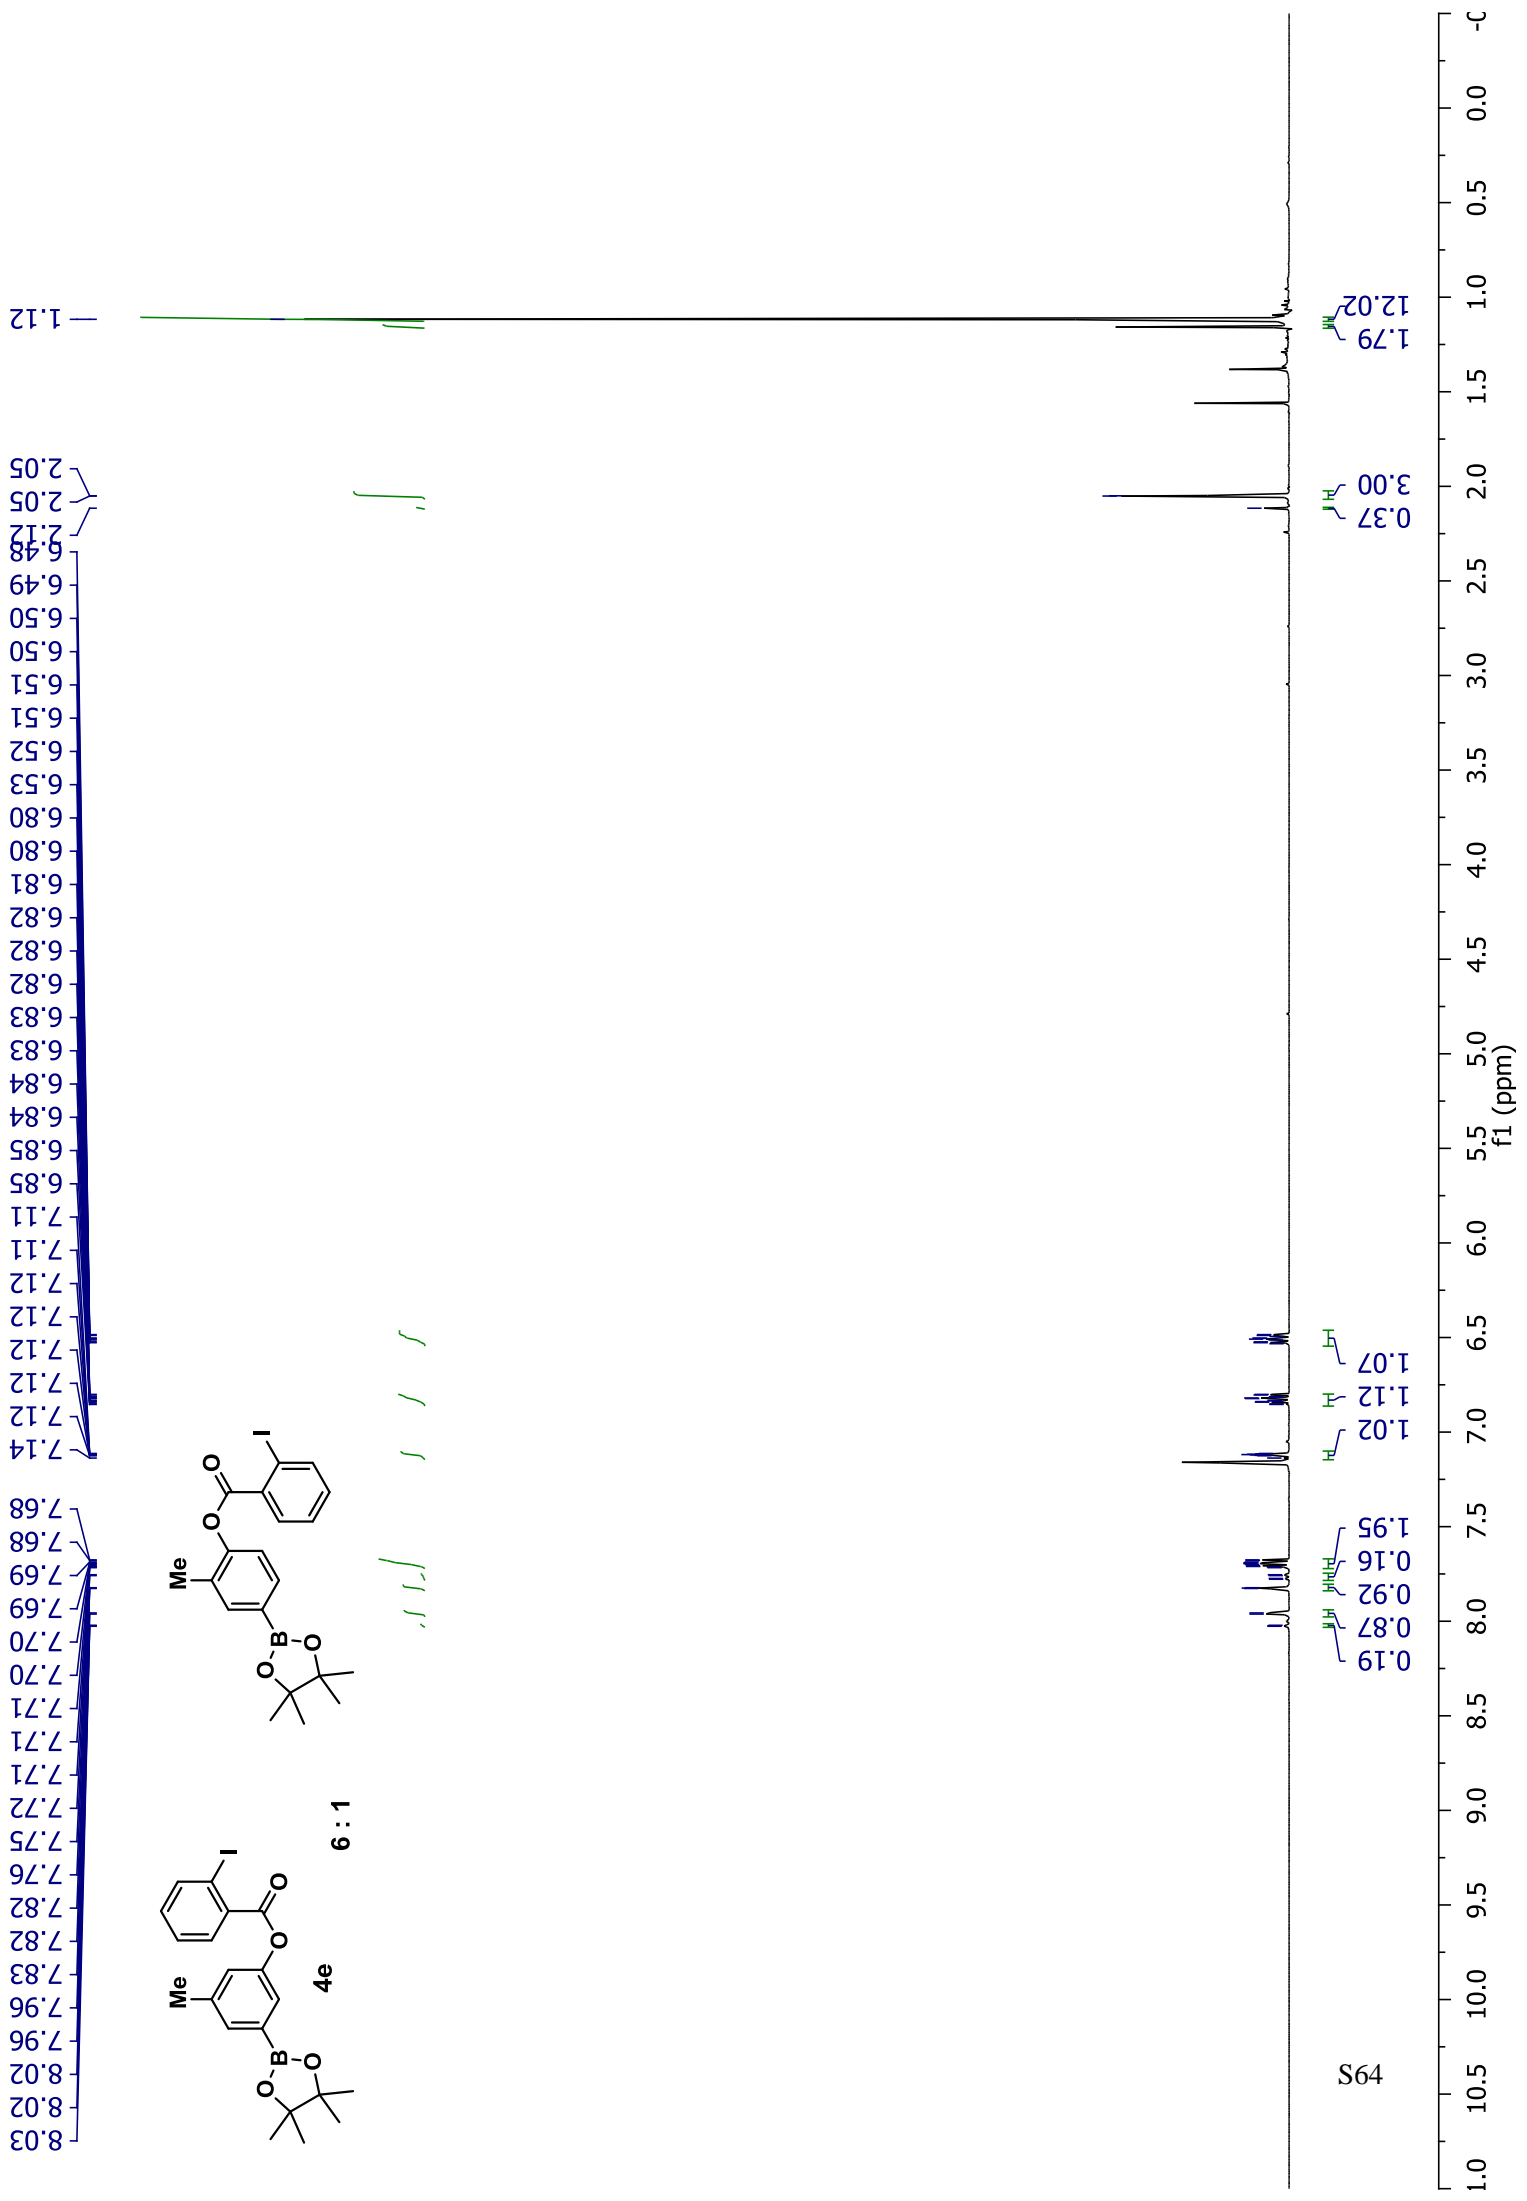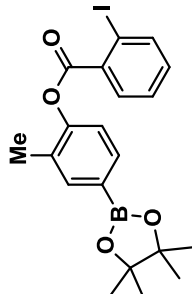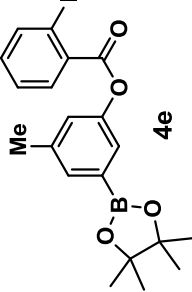

6 : 1

4e

964

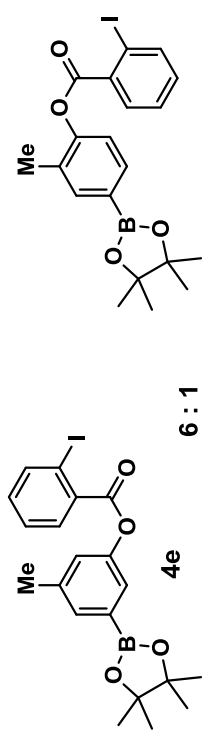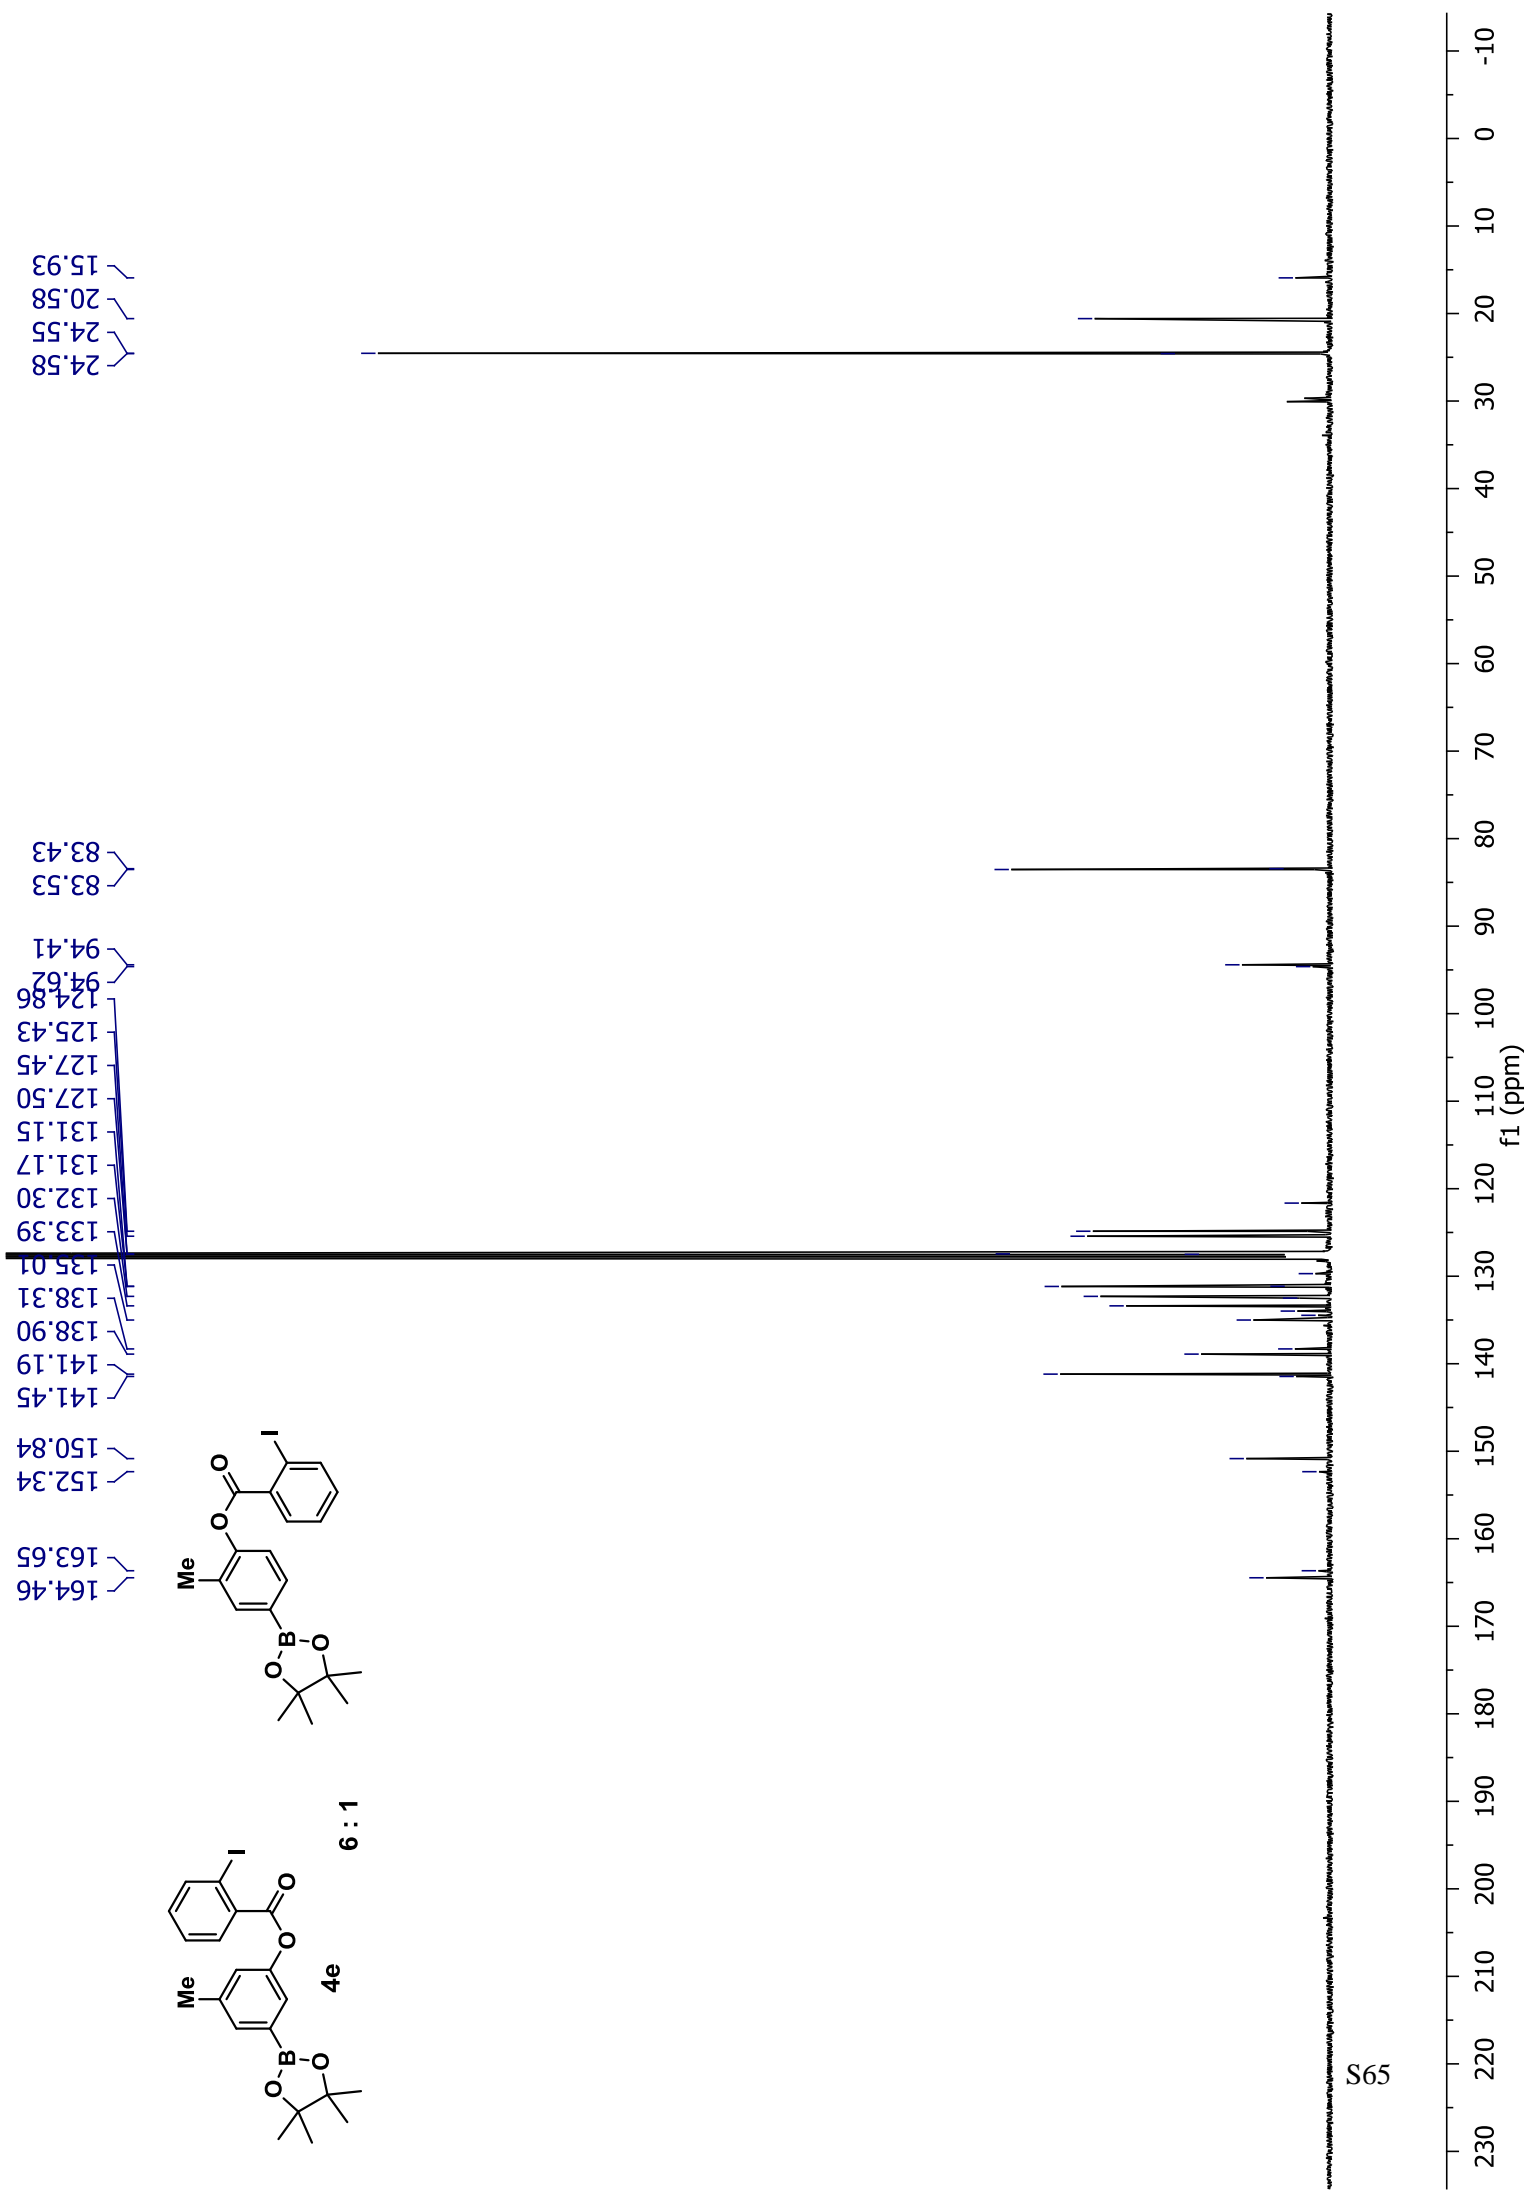

— 30.75

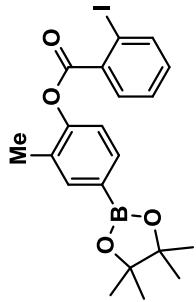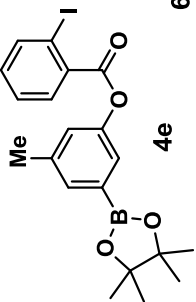

6 : 1

4e

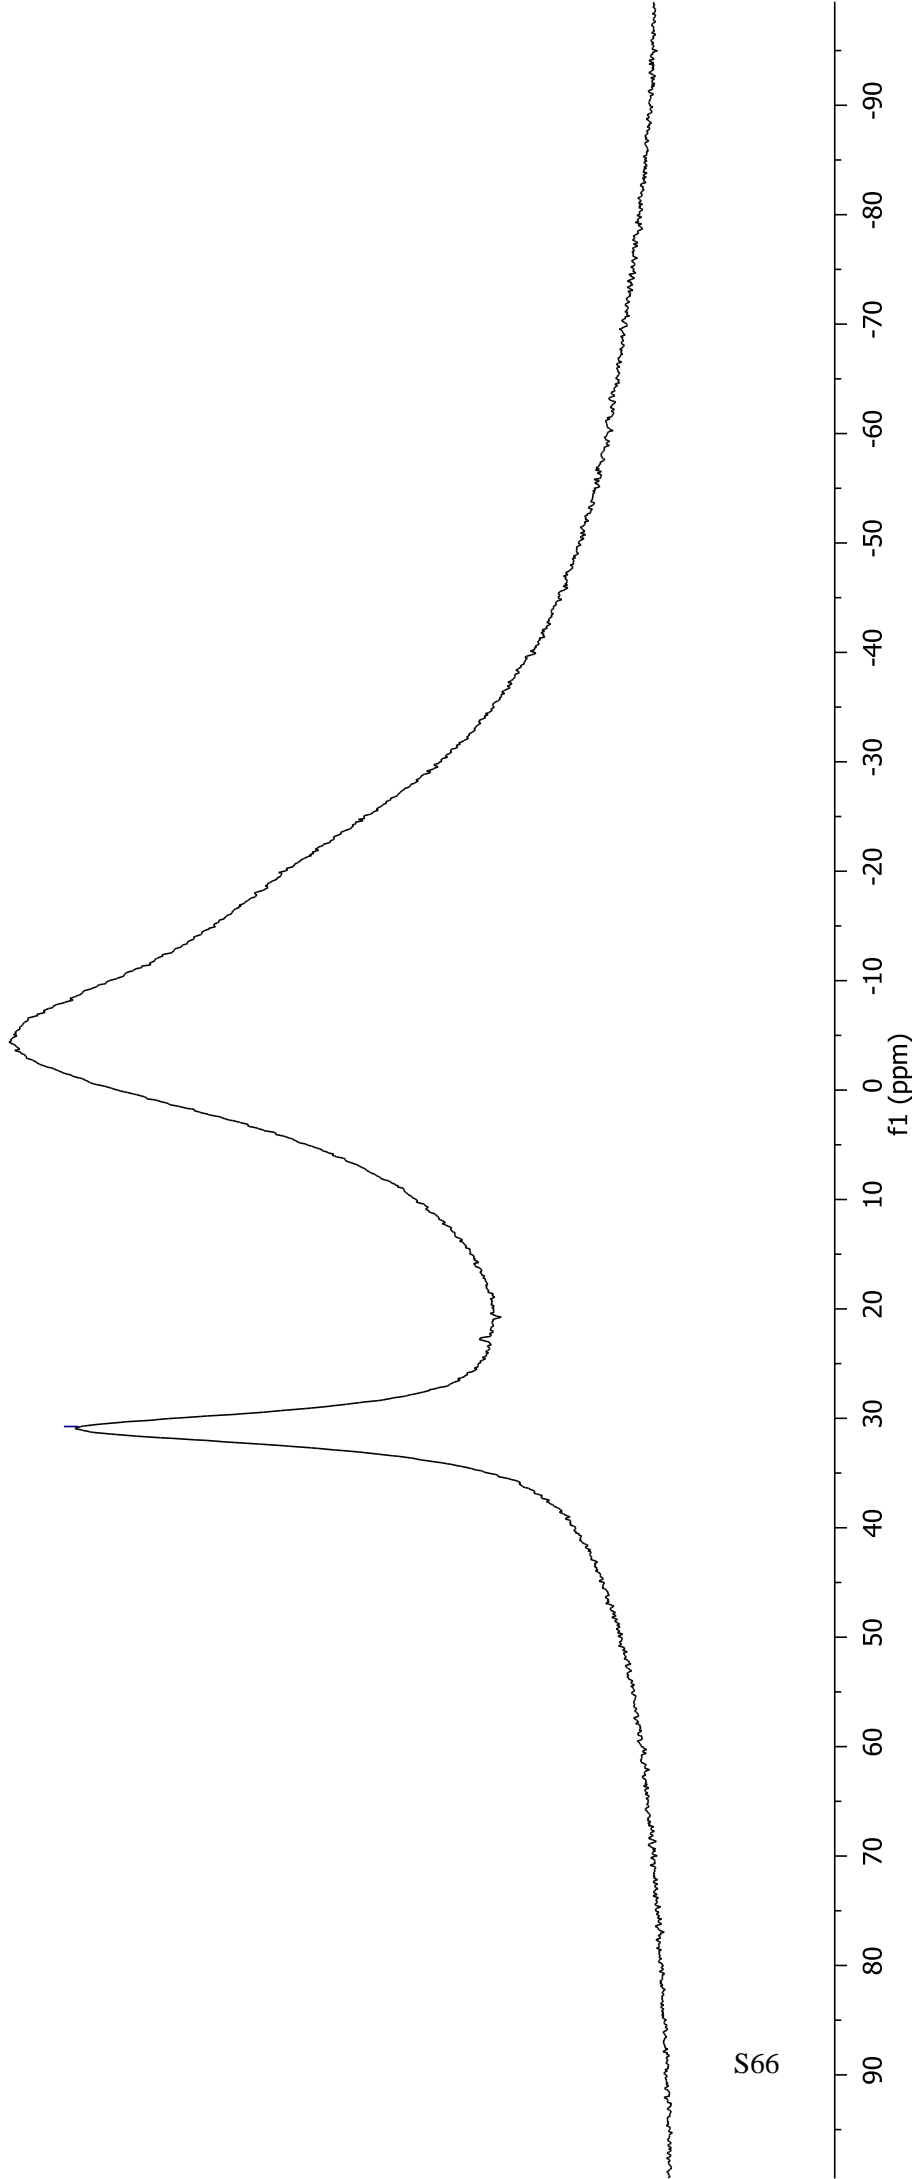

ed193-02\_ana\_PROTON\_01

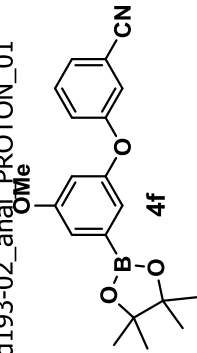

7.41  
7.40  
7.38  
7.34  
7.32  
7.22  
7.20  
7.18  
7.05  
6.69  
6.68  
6.68

11111111

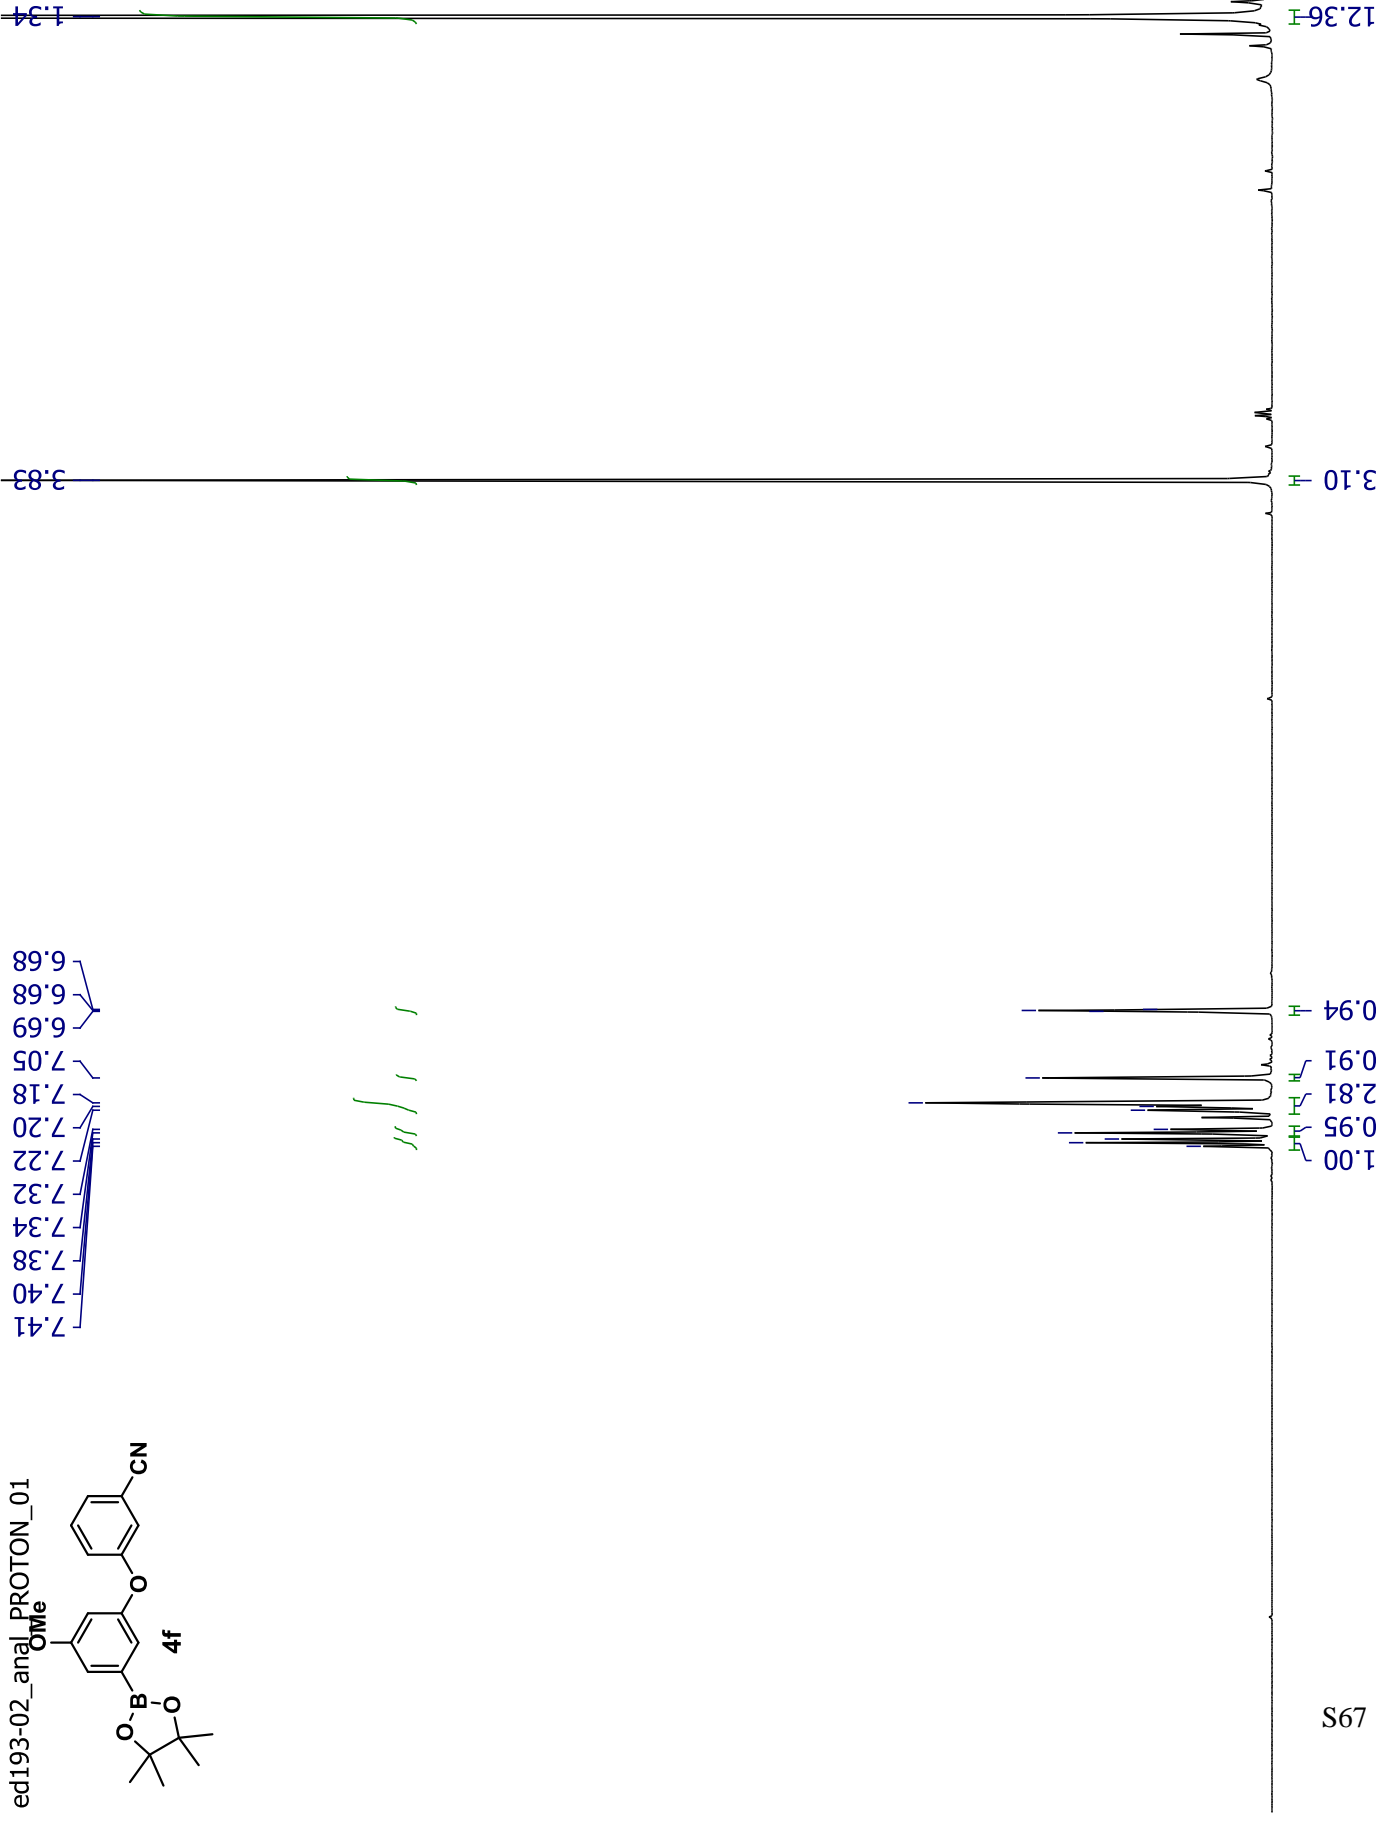

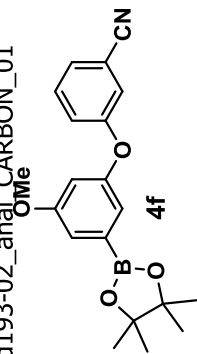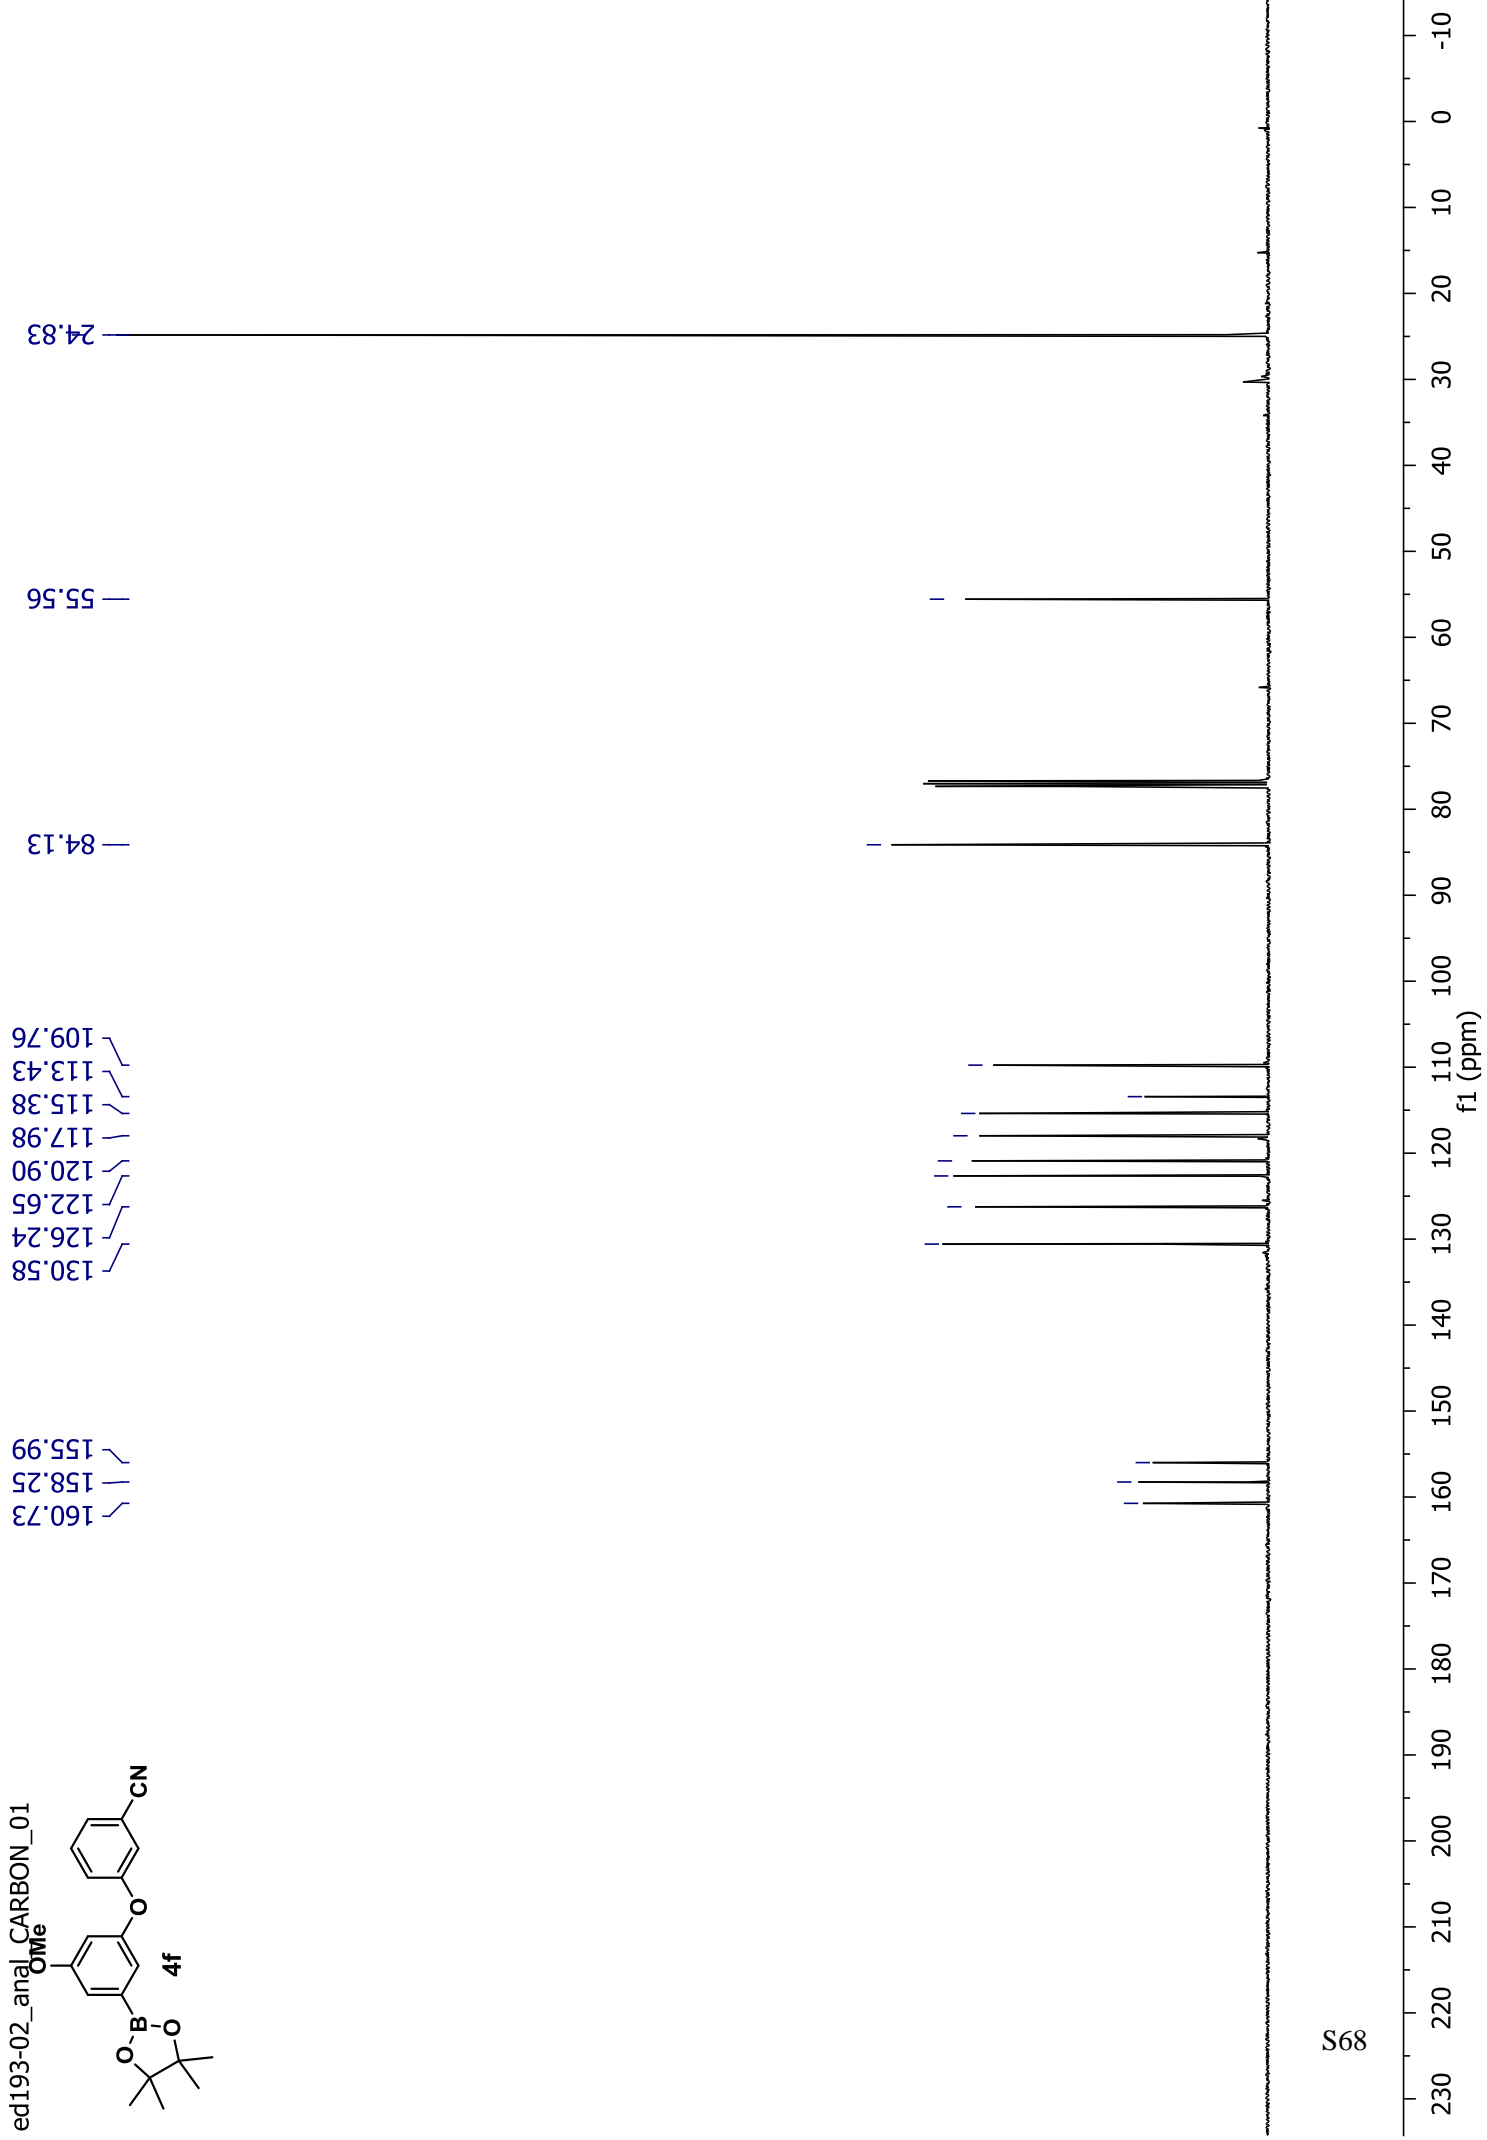

— 30.87

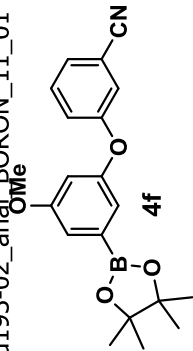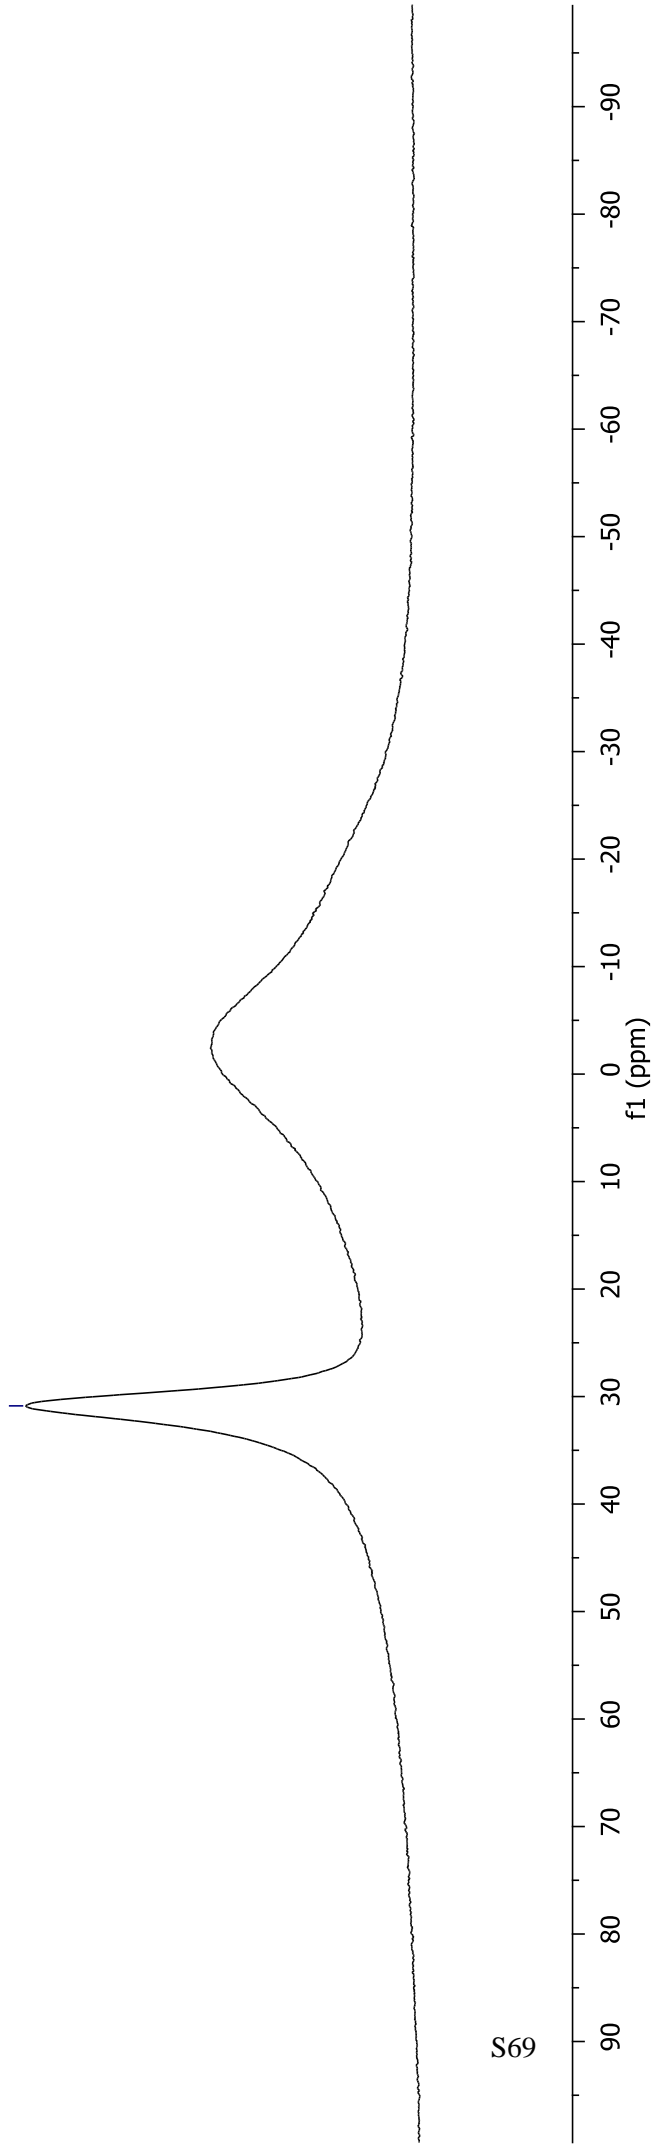

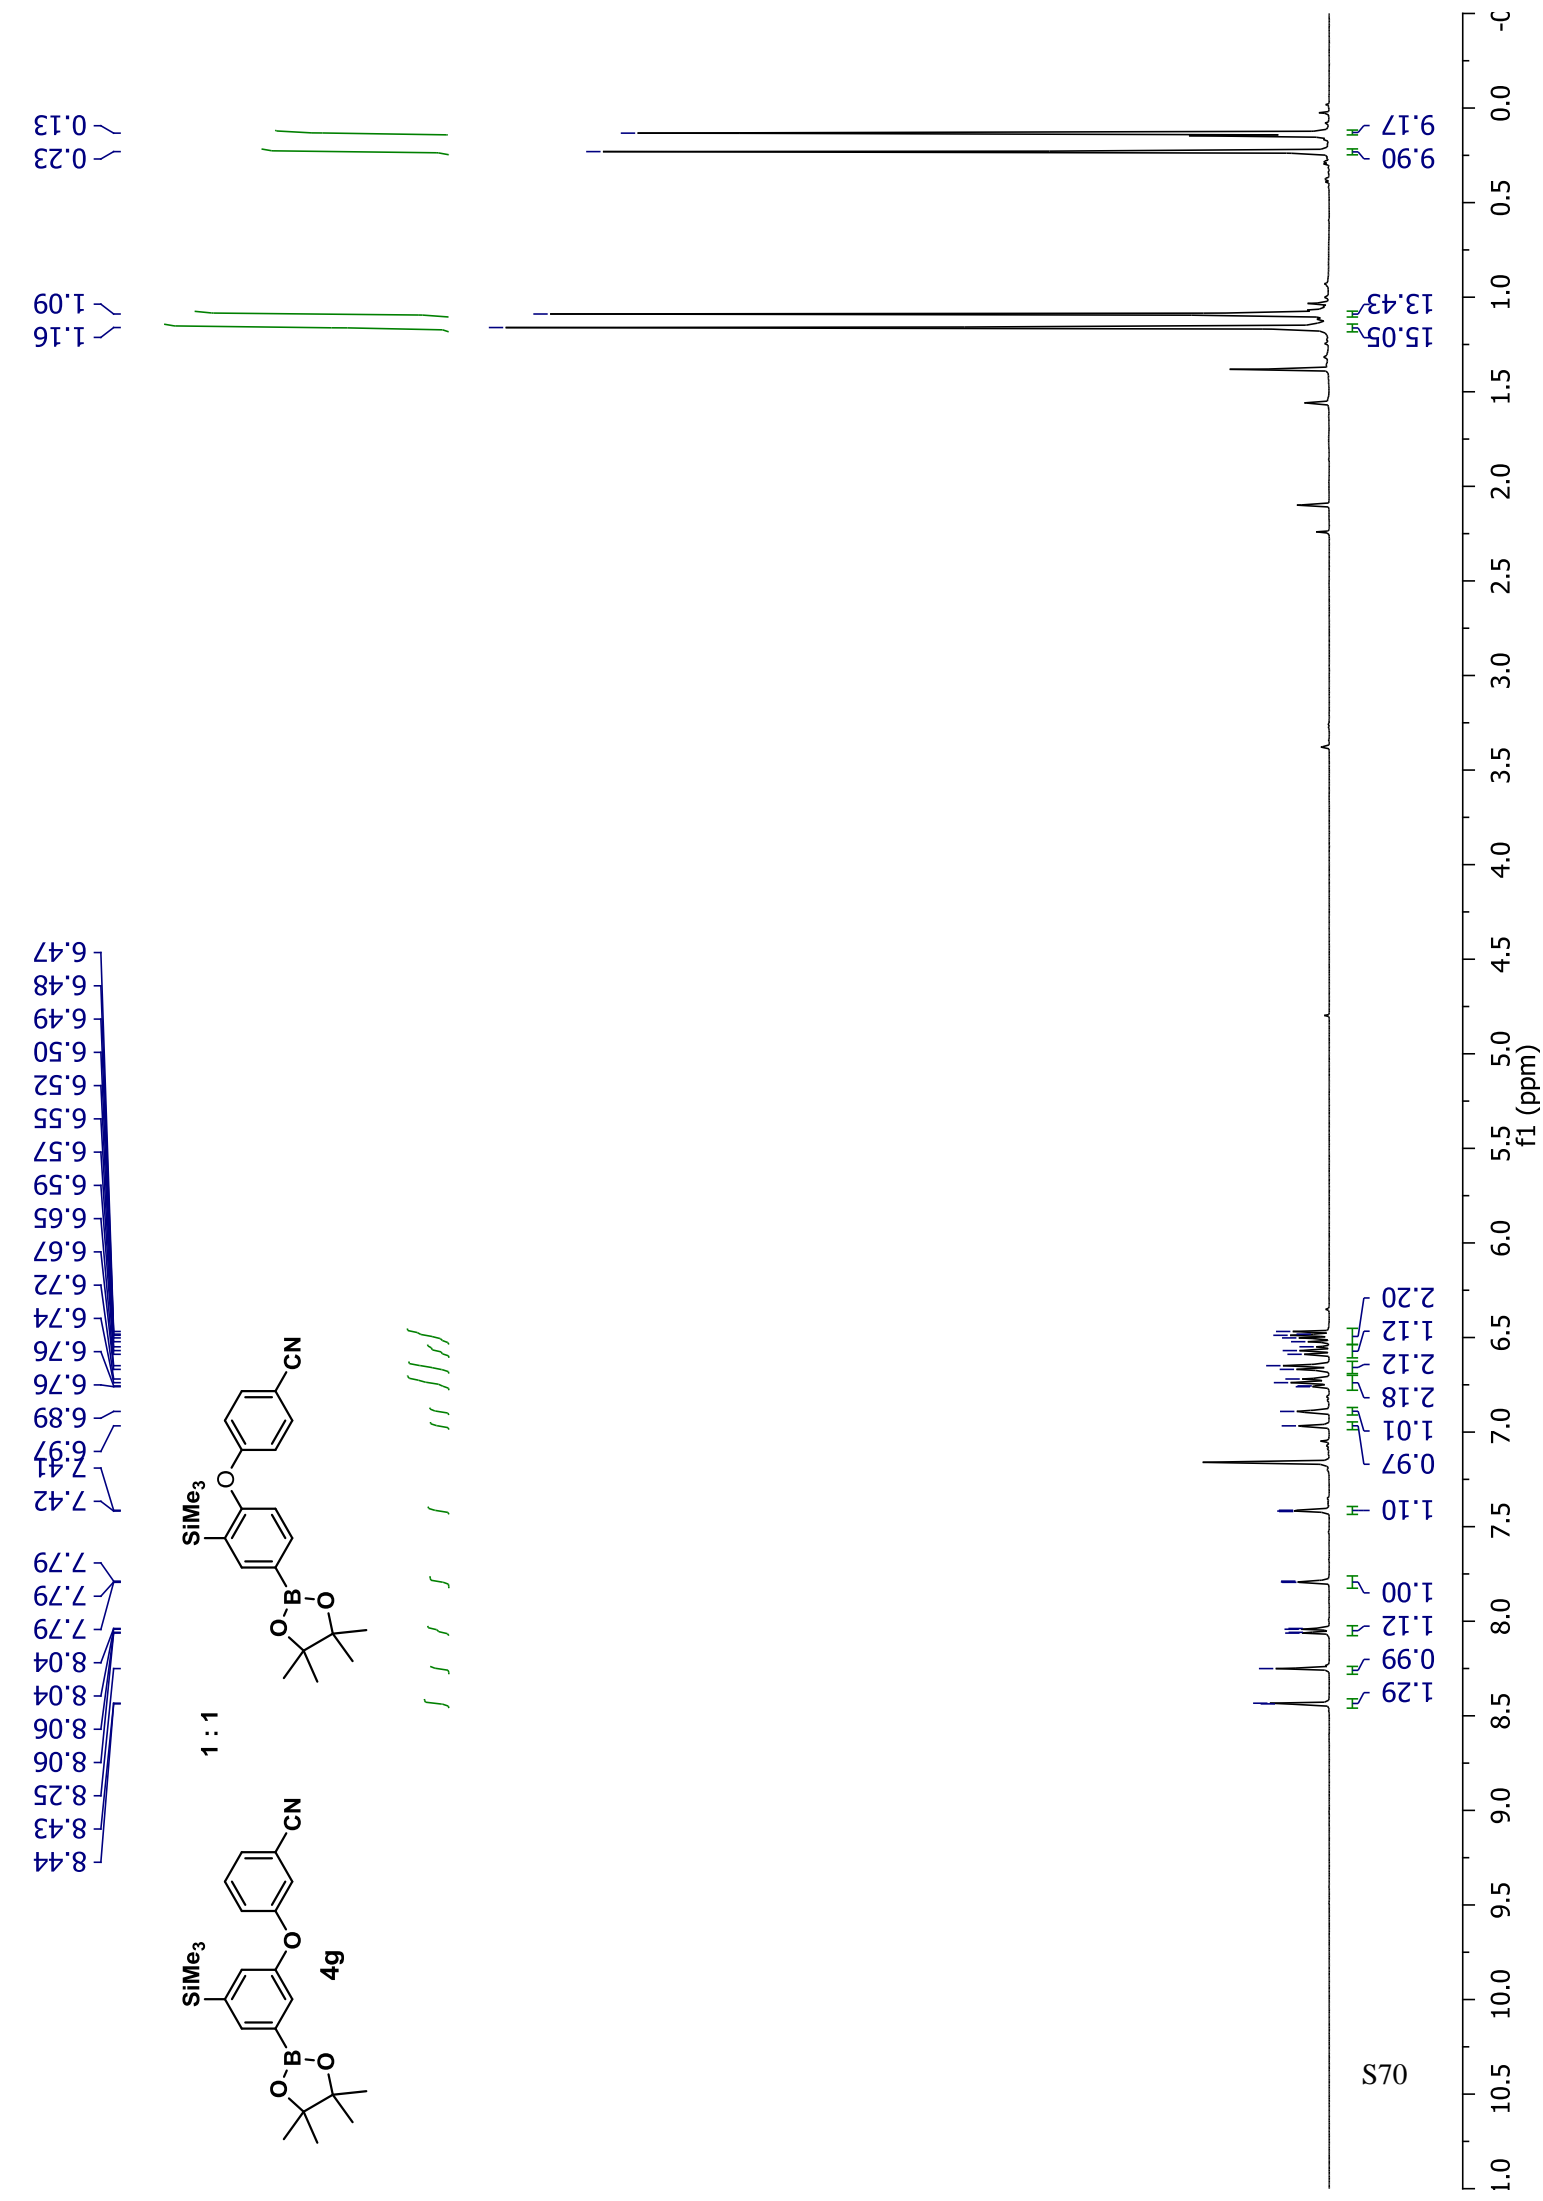

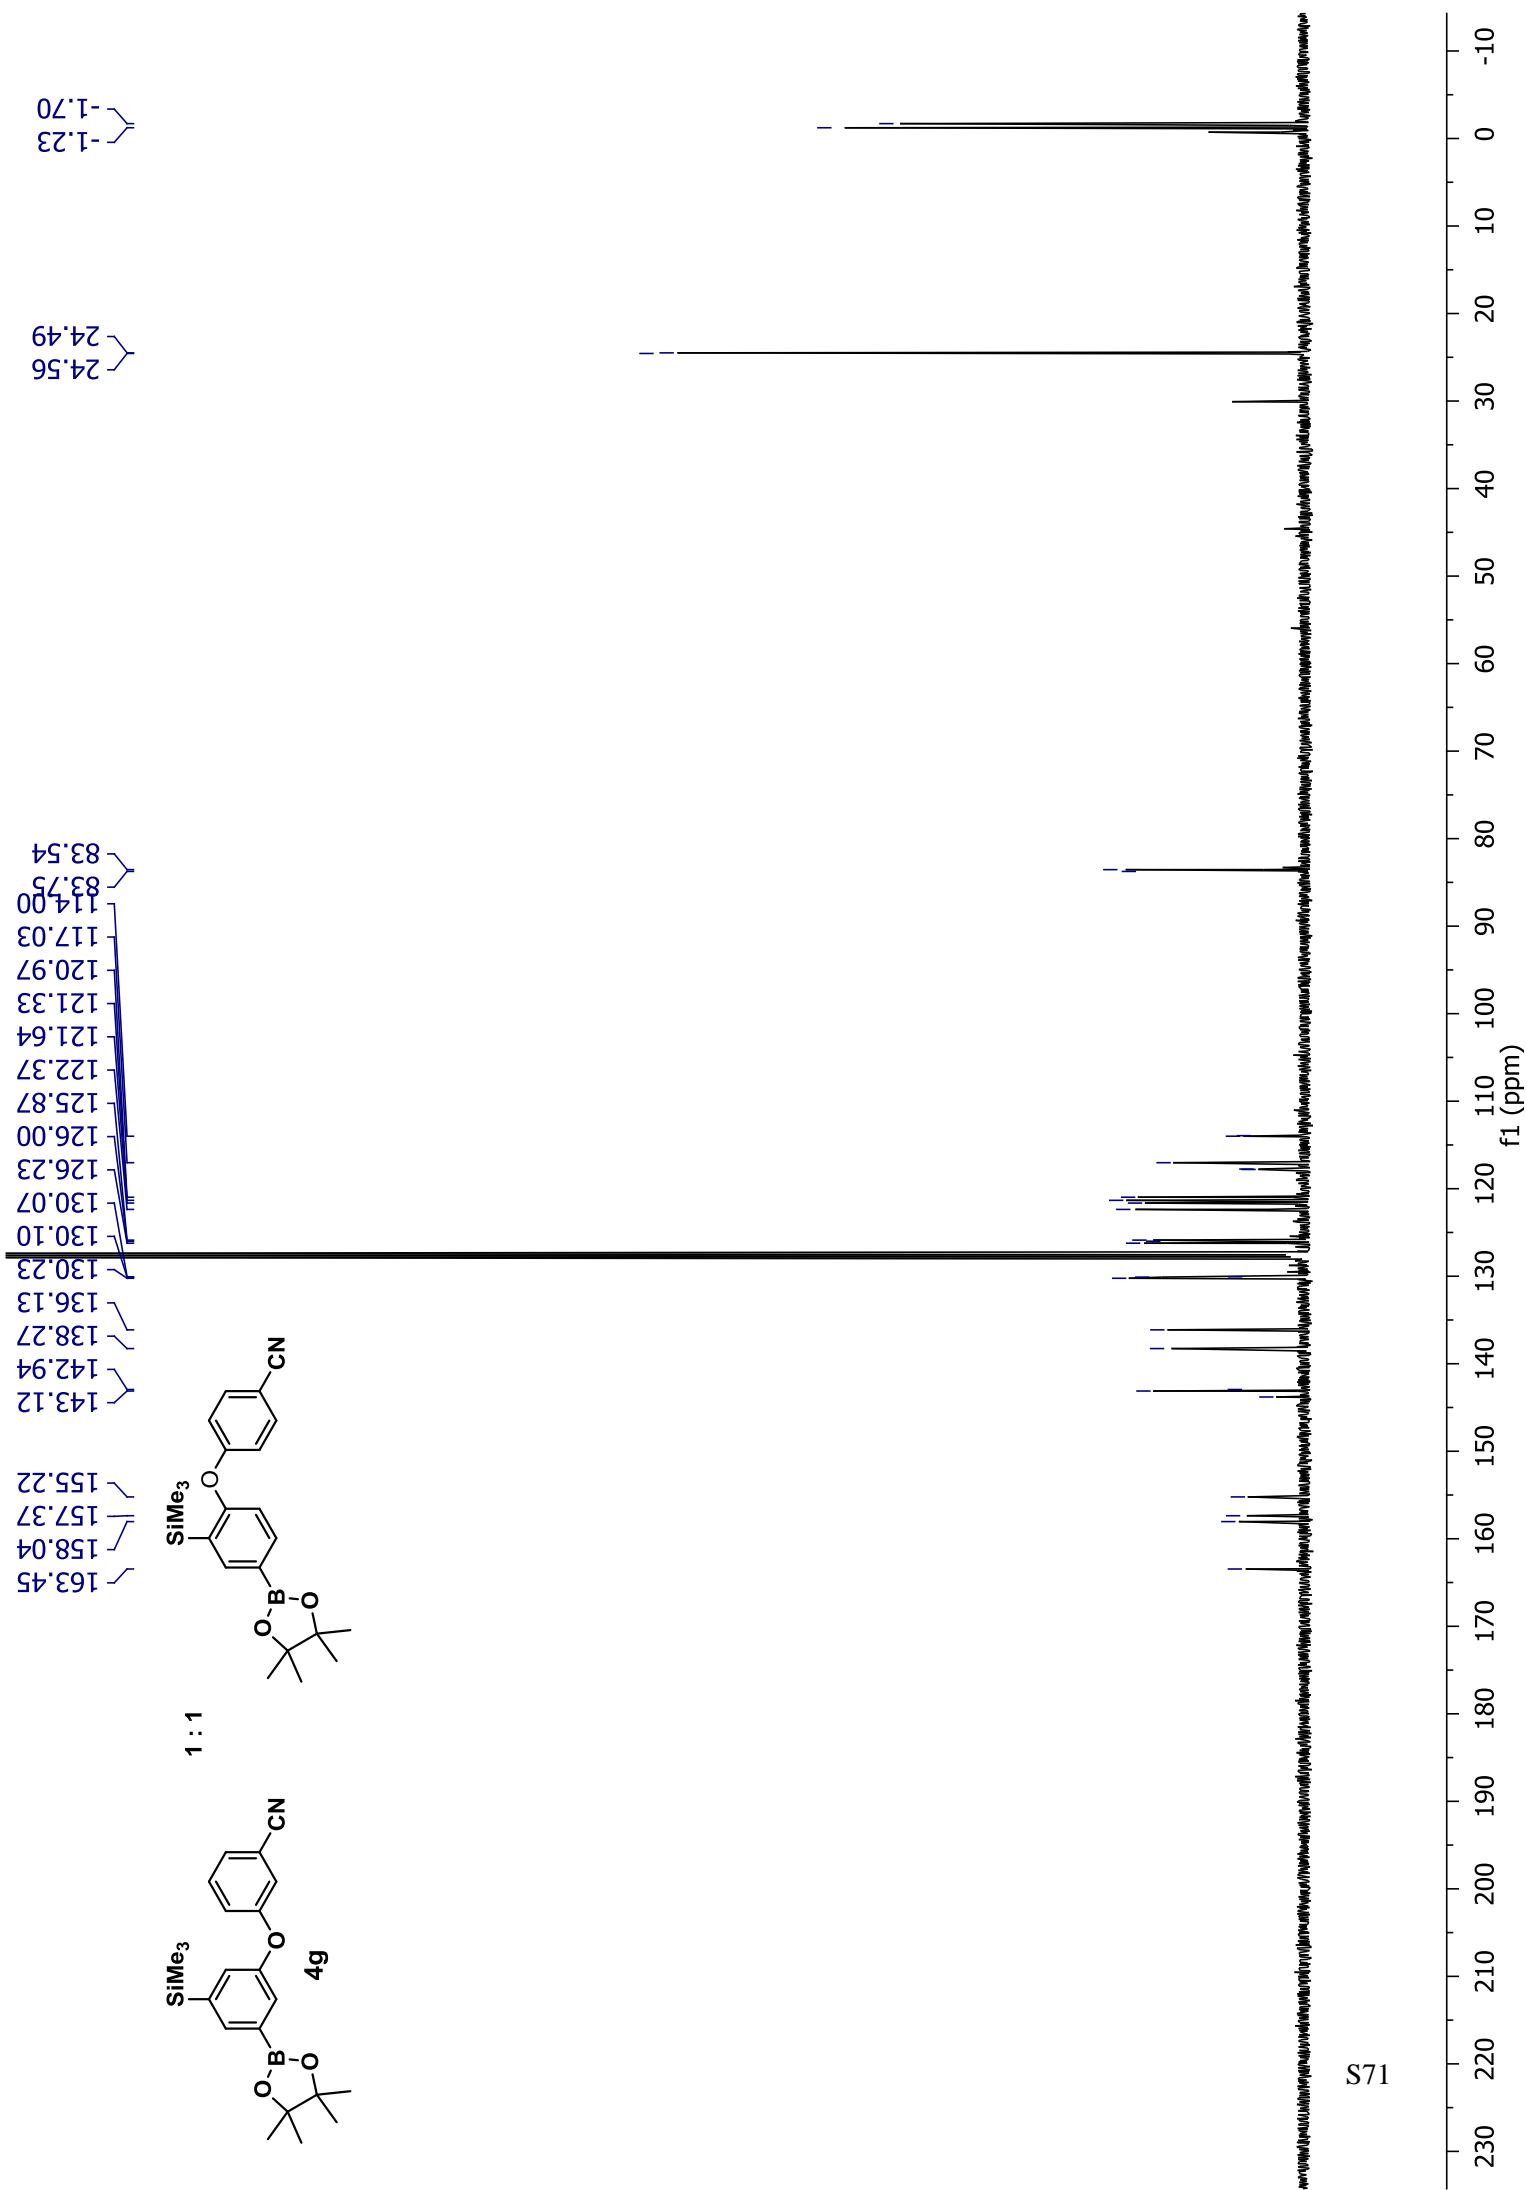



68.0C —

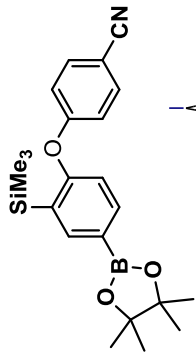

1 : 1

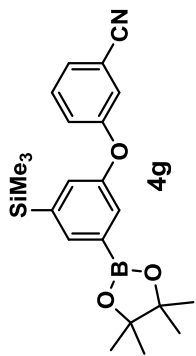

4g

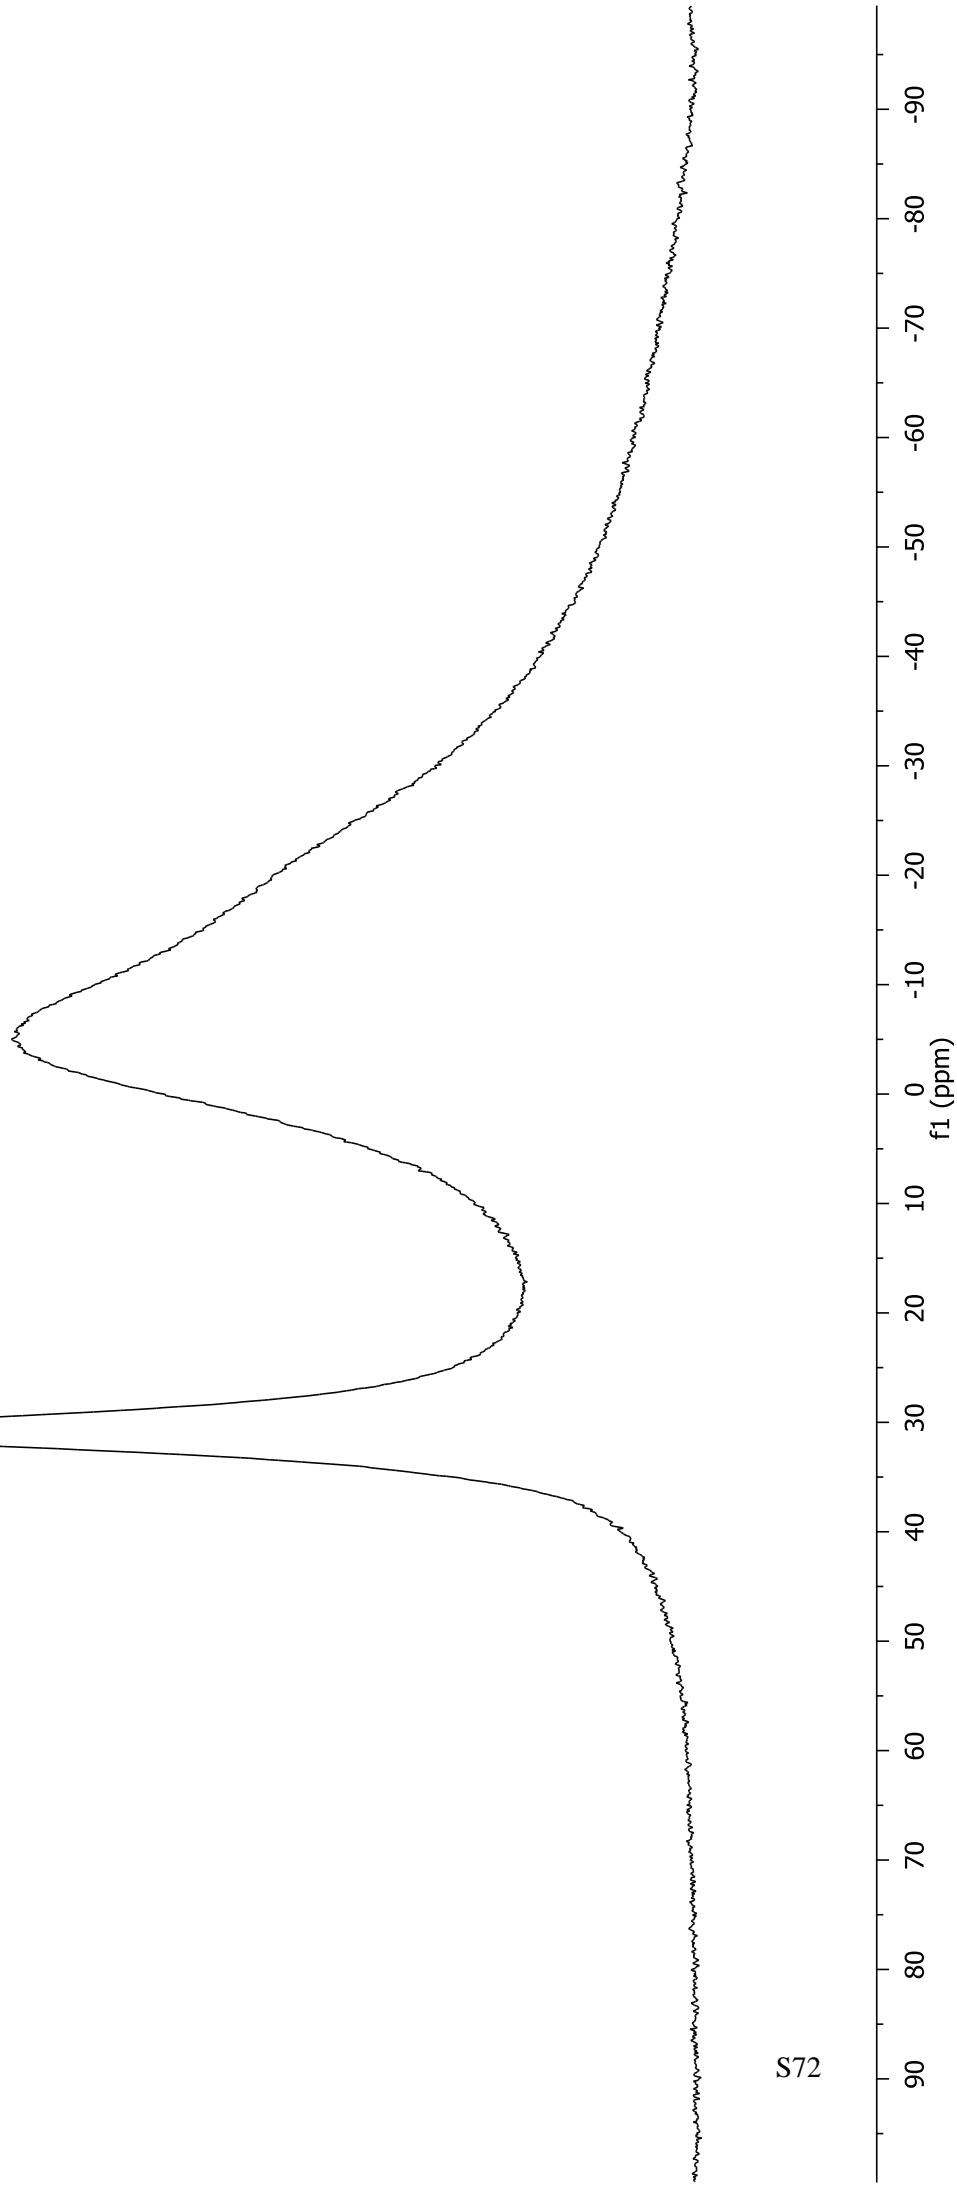

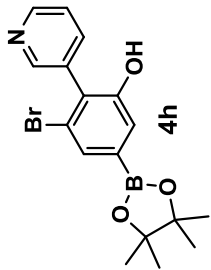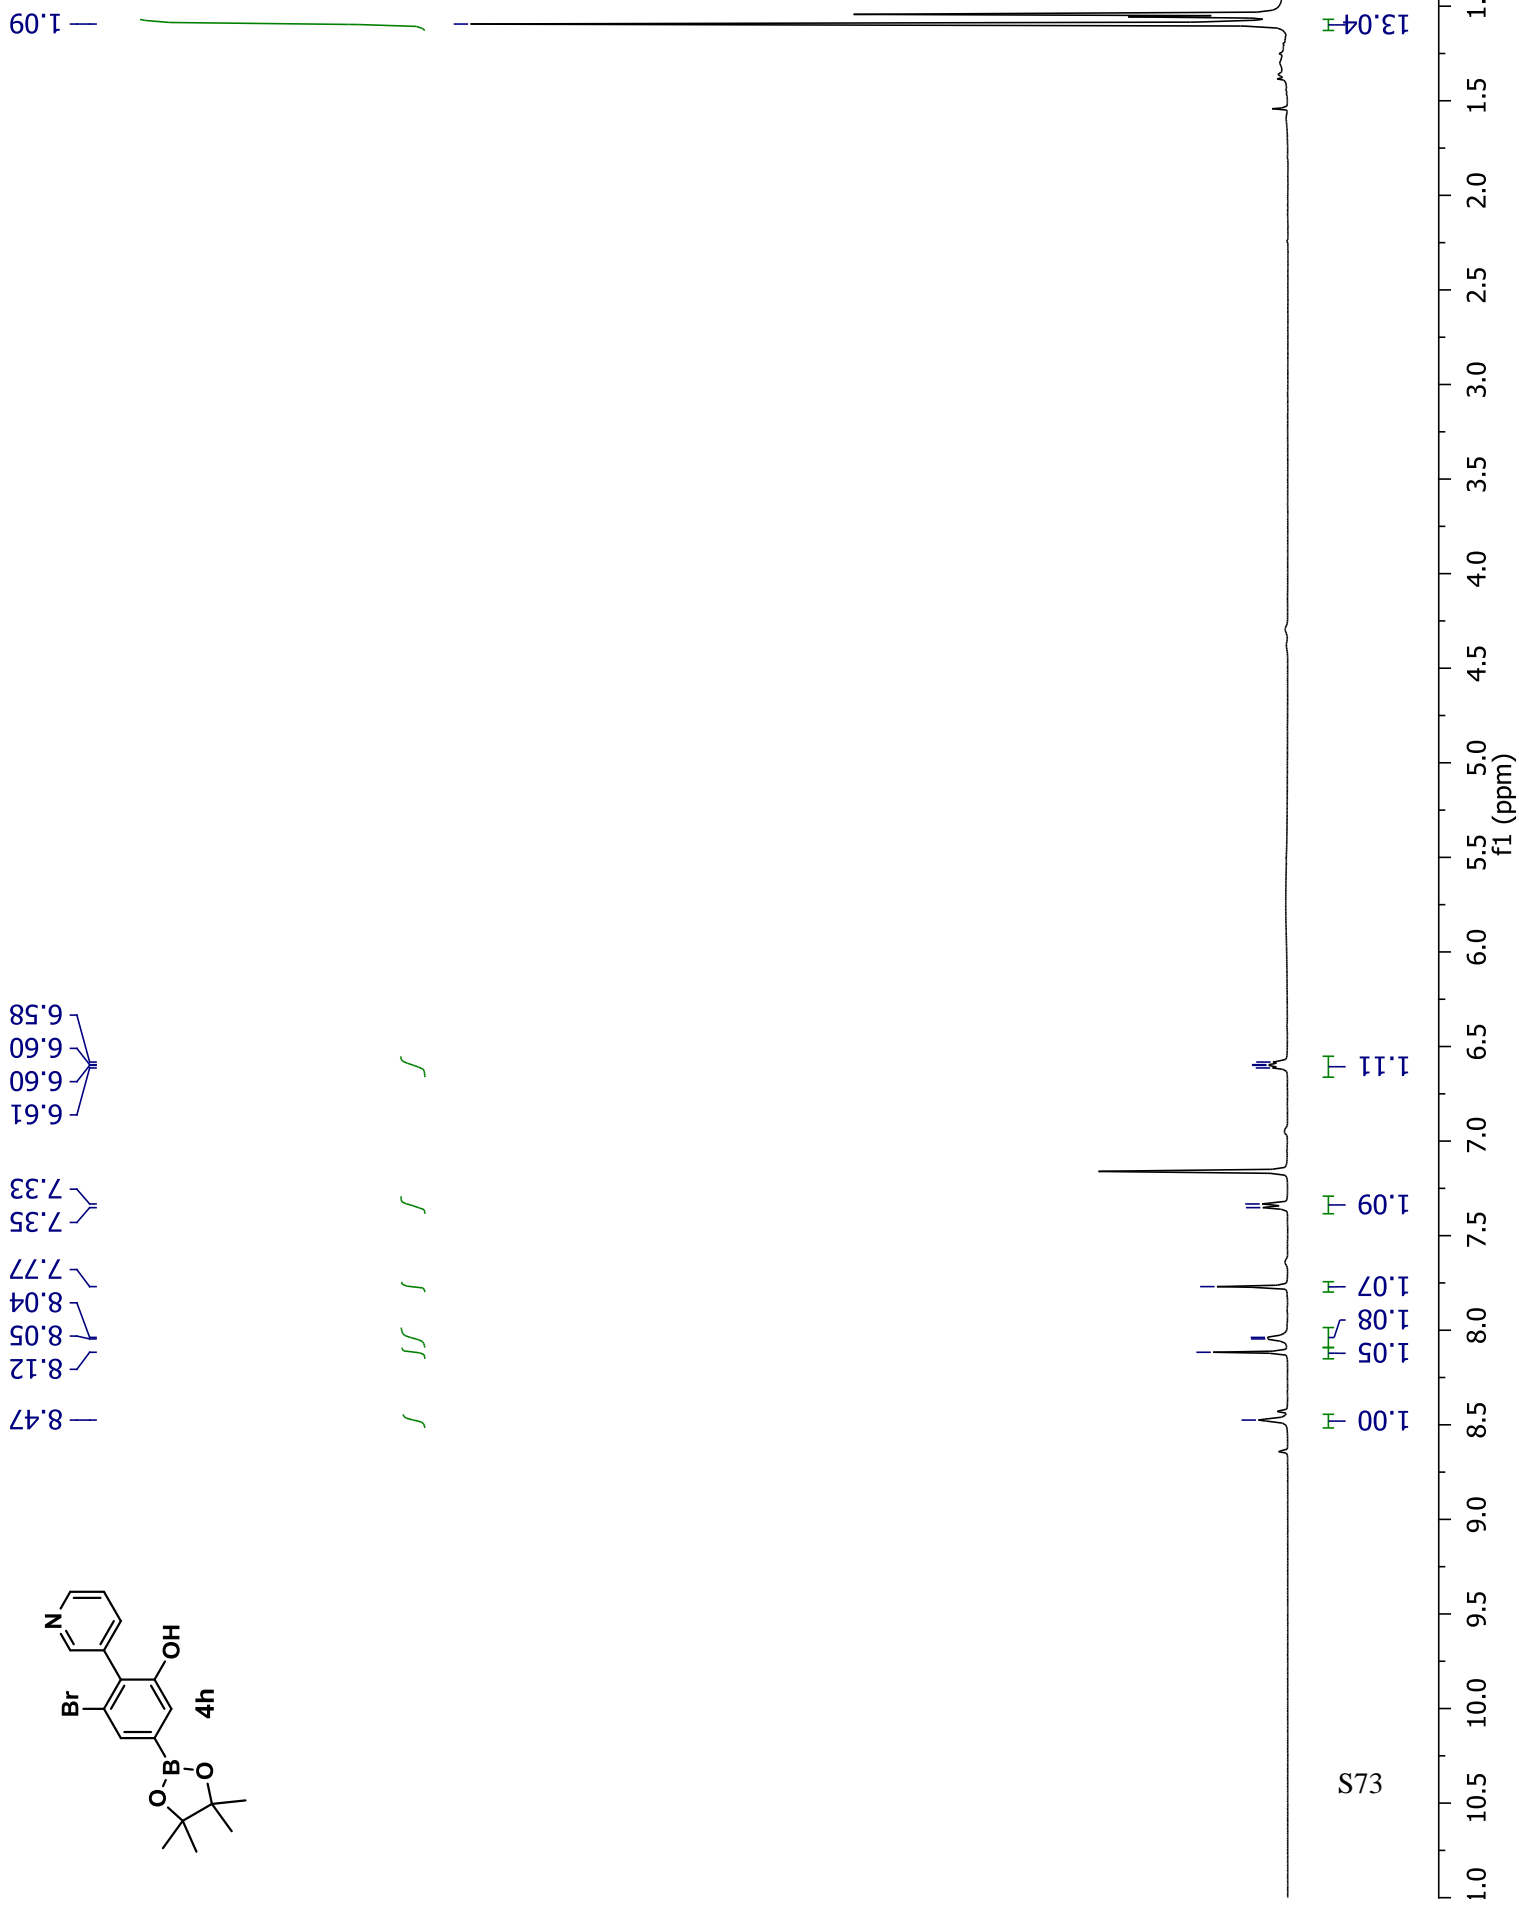

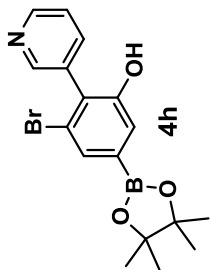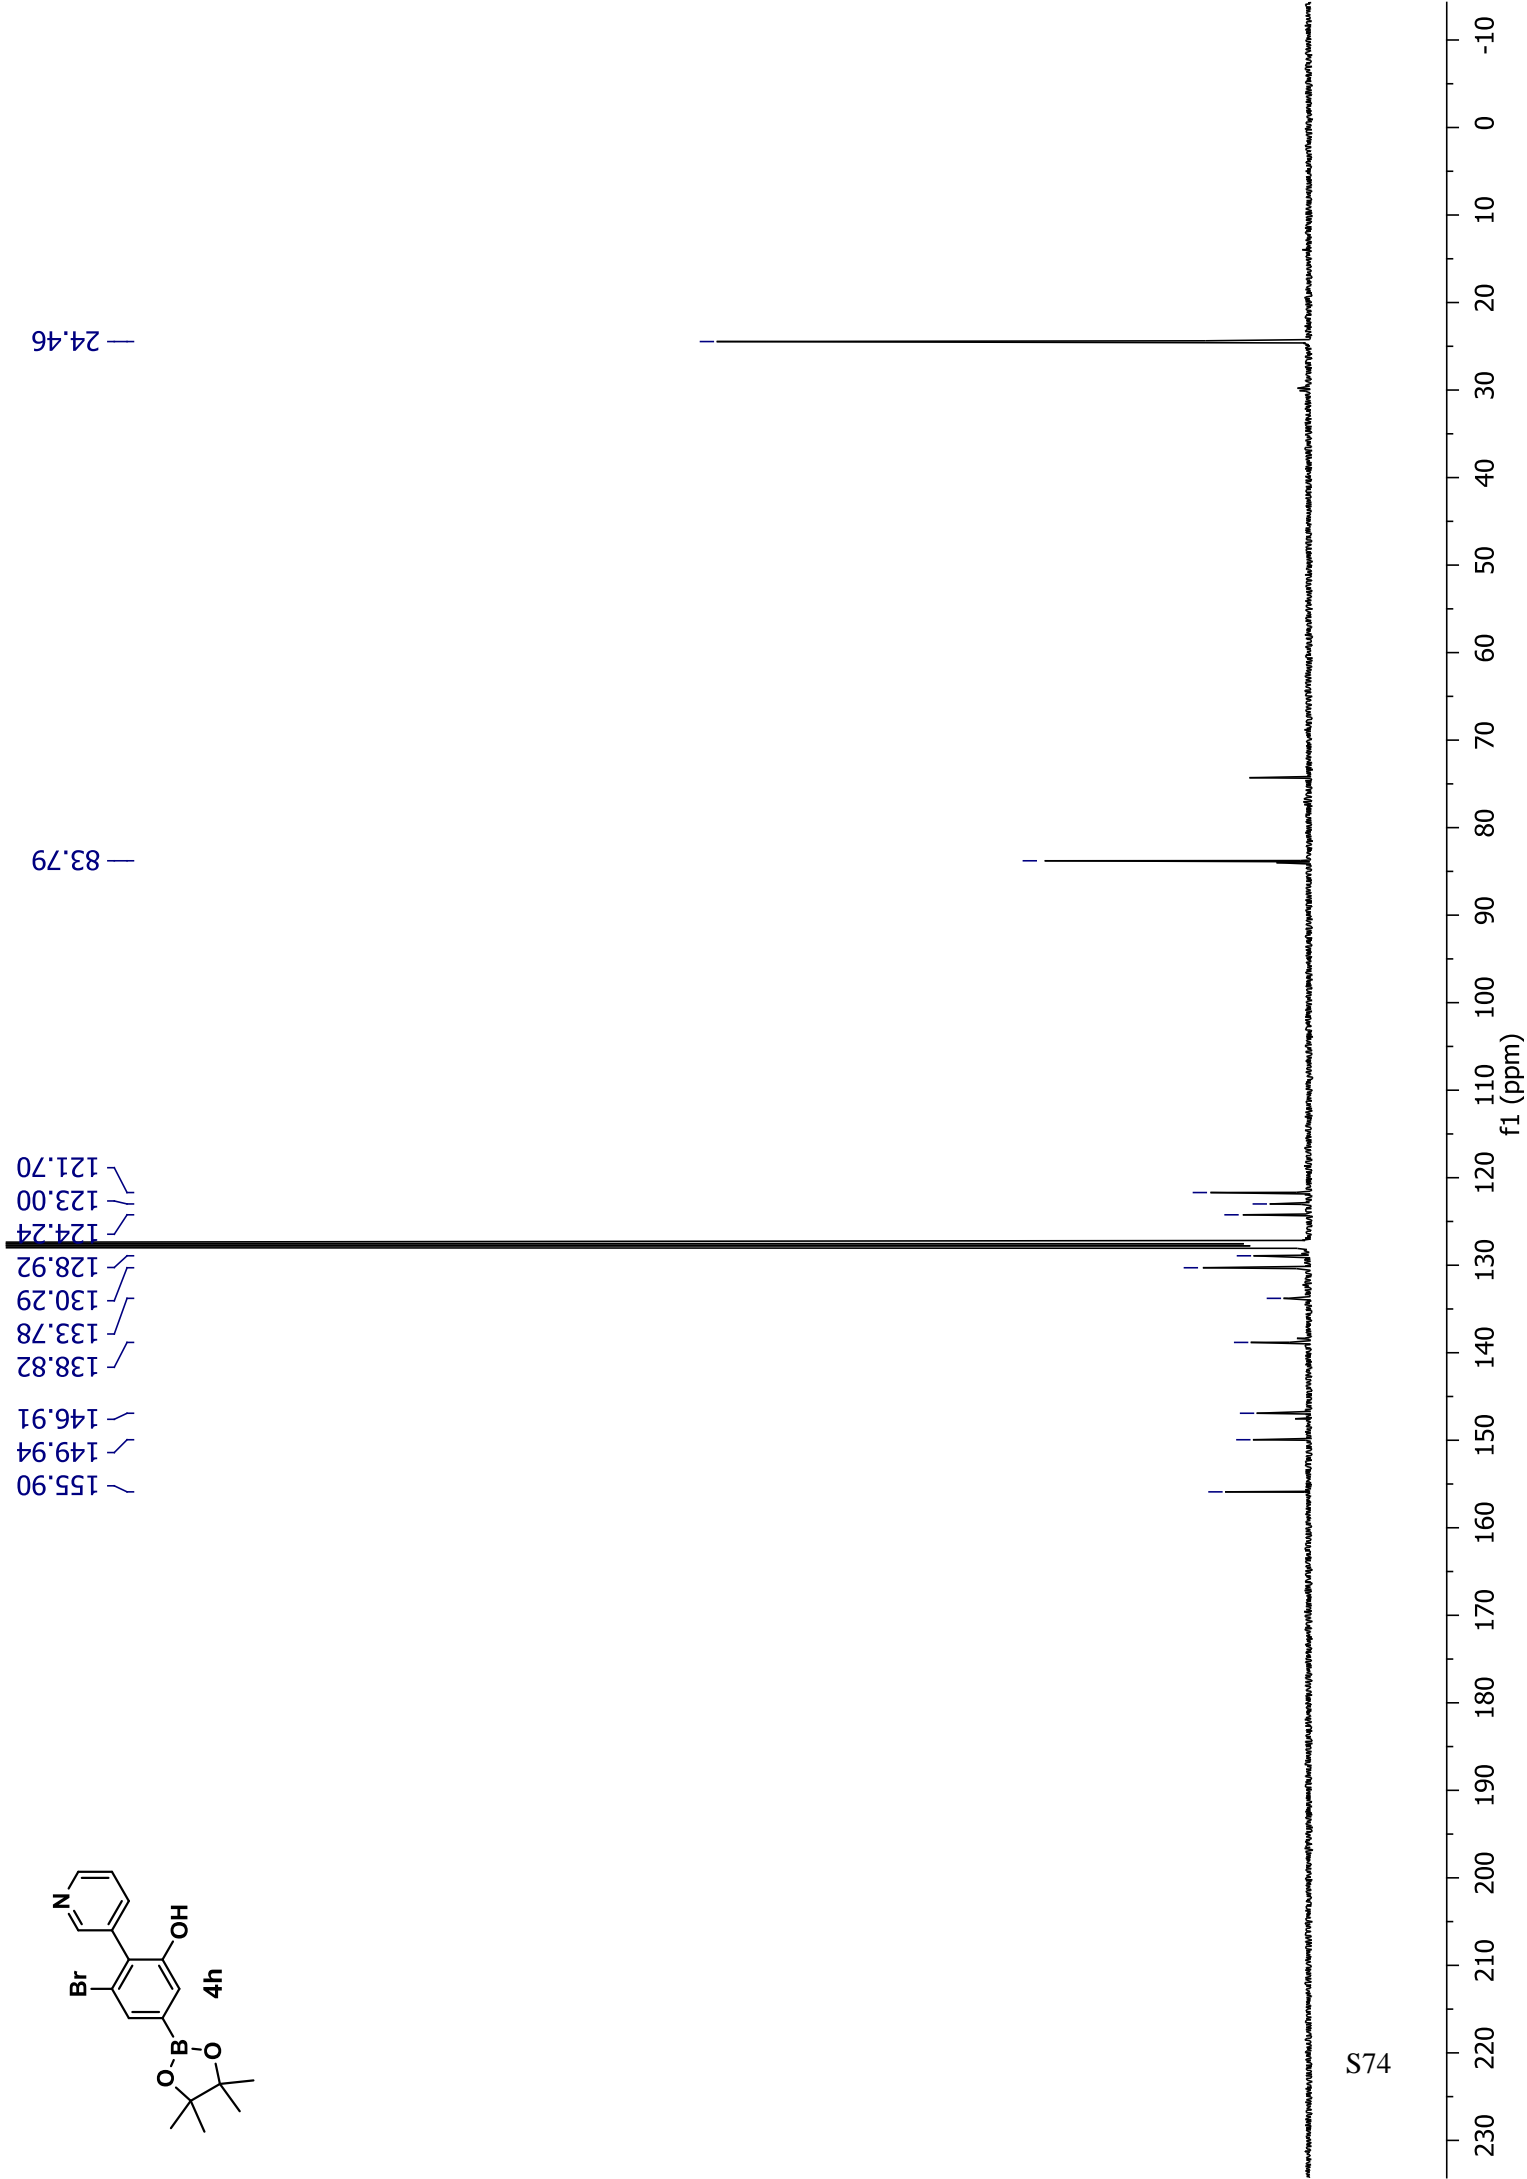

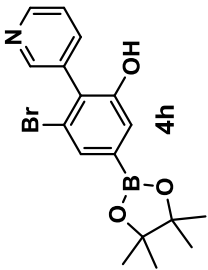

— 29.86

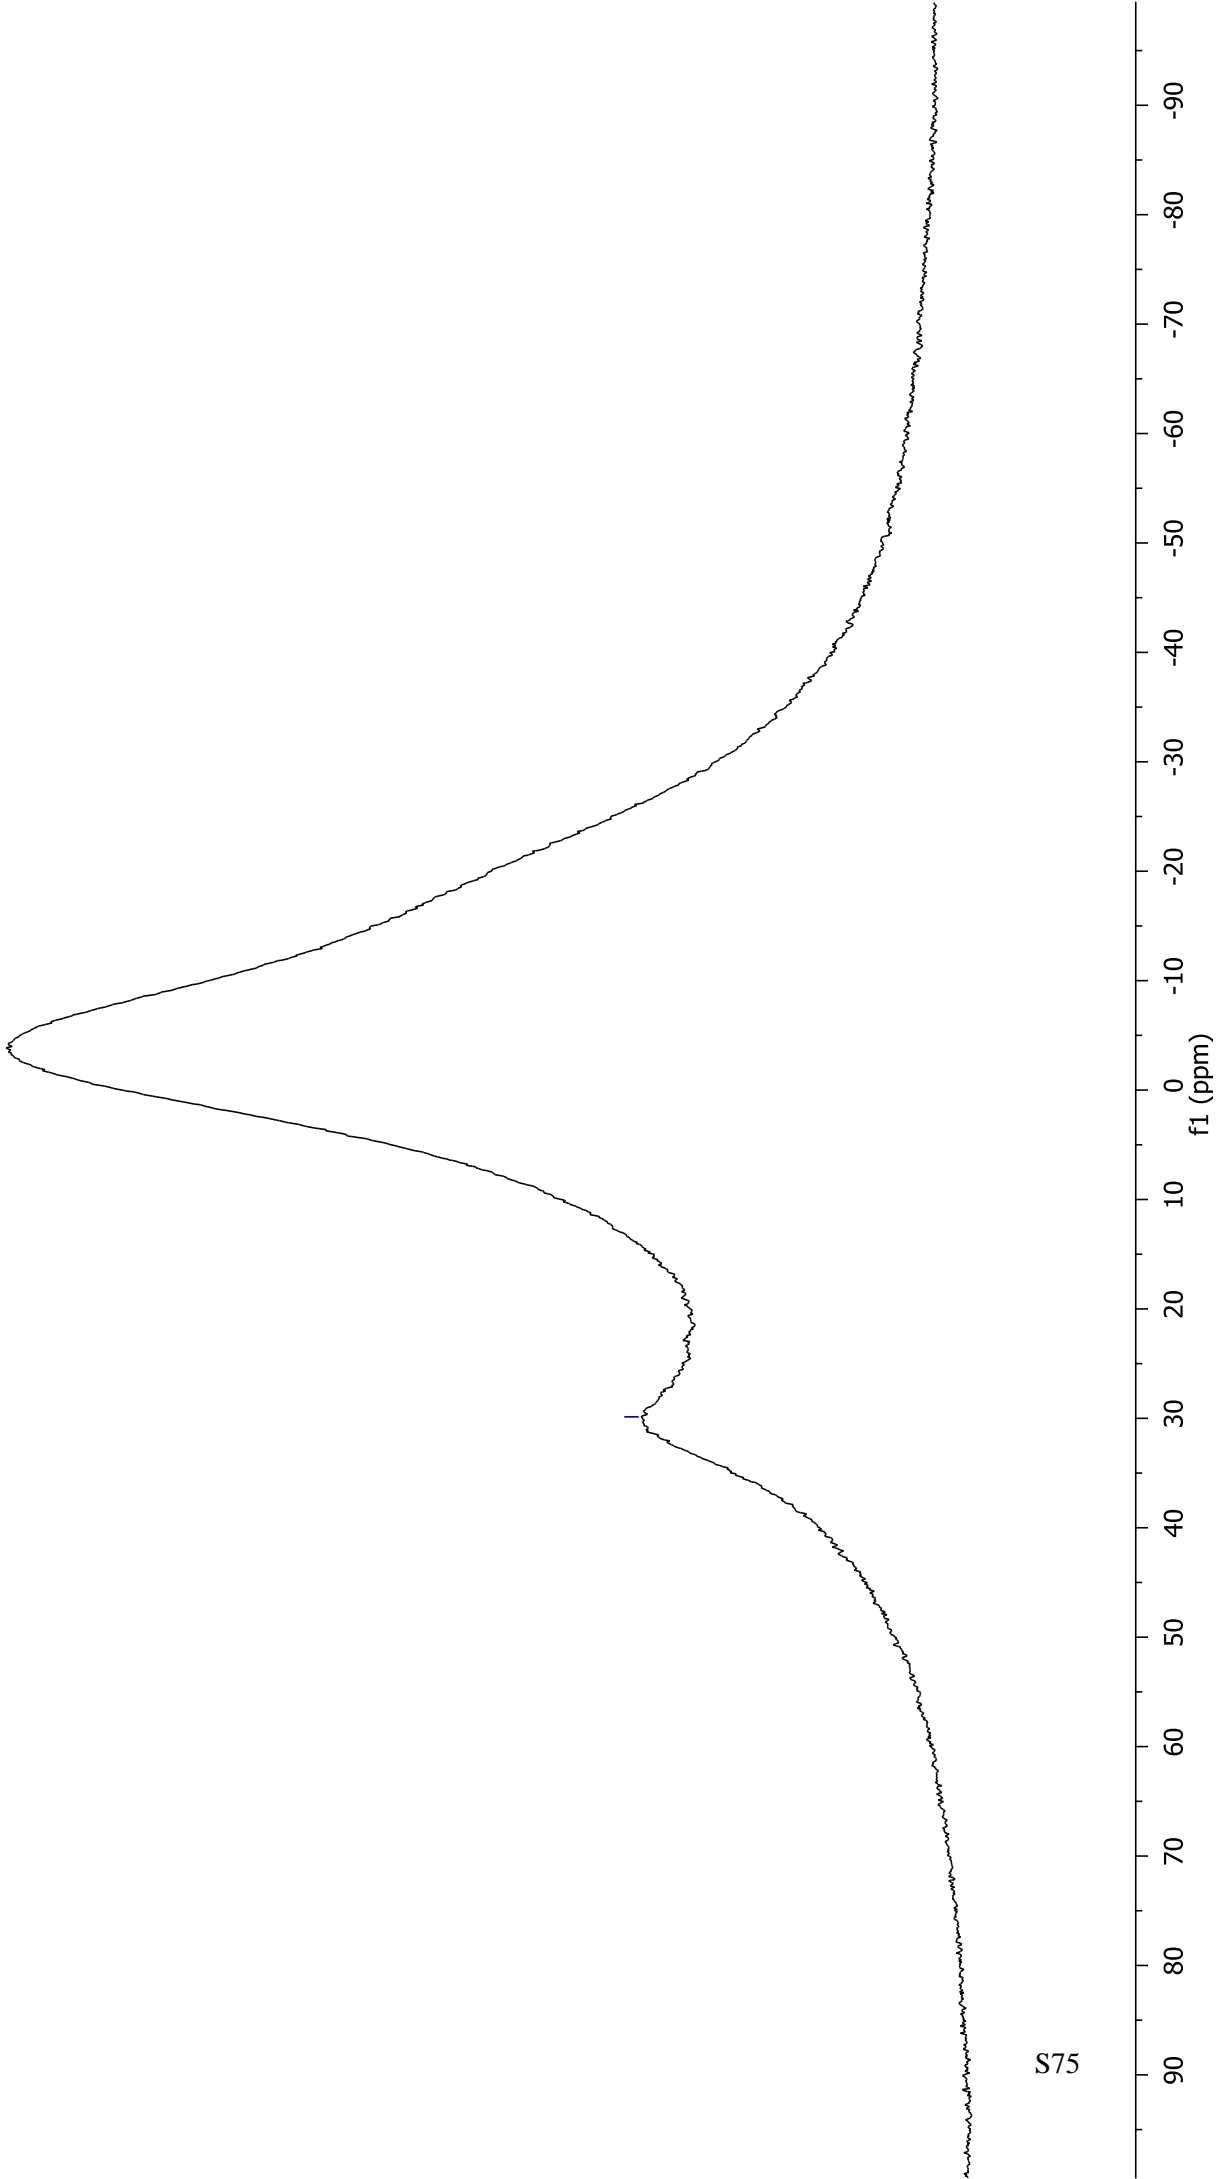

S75

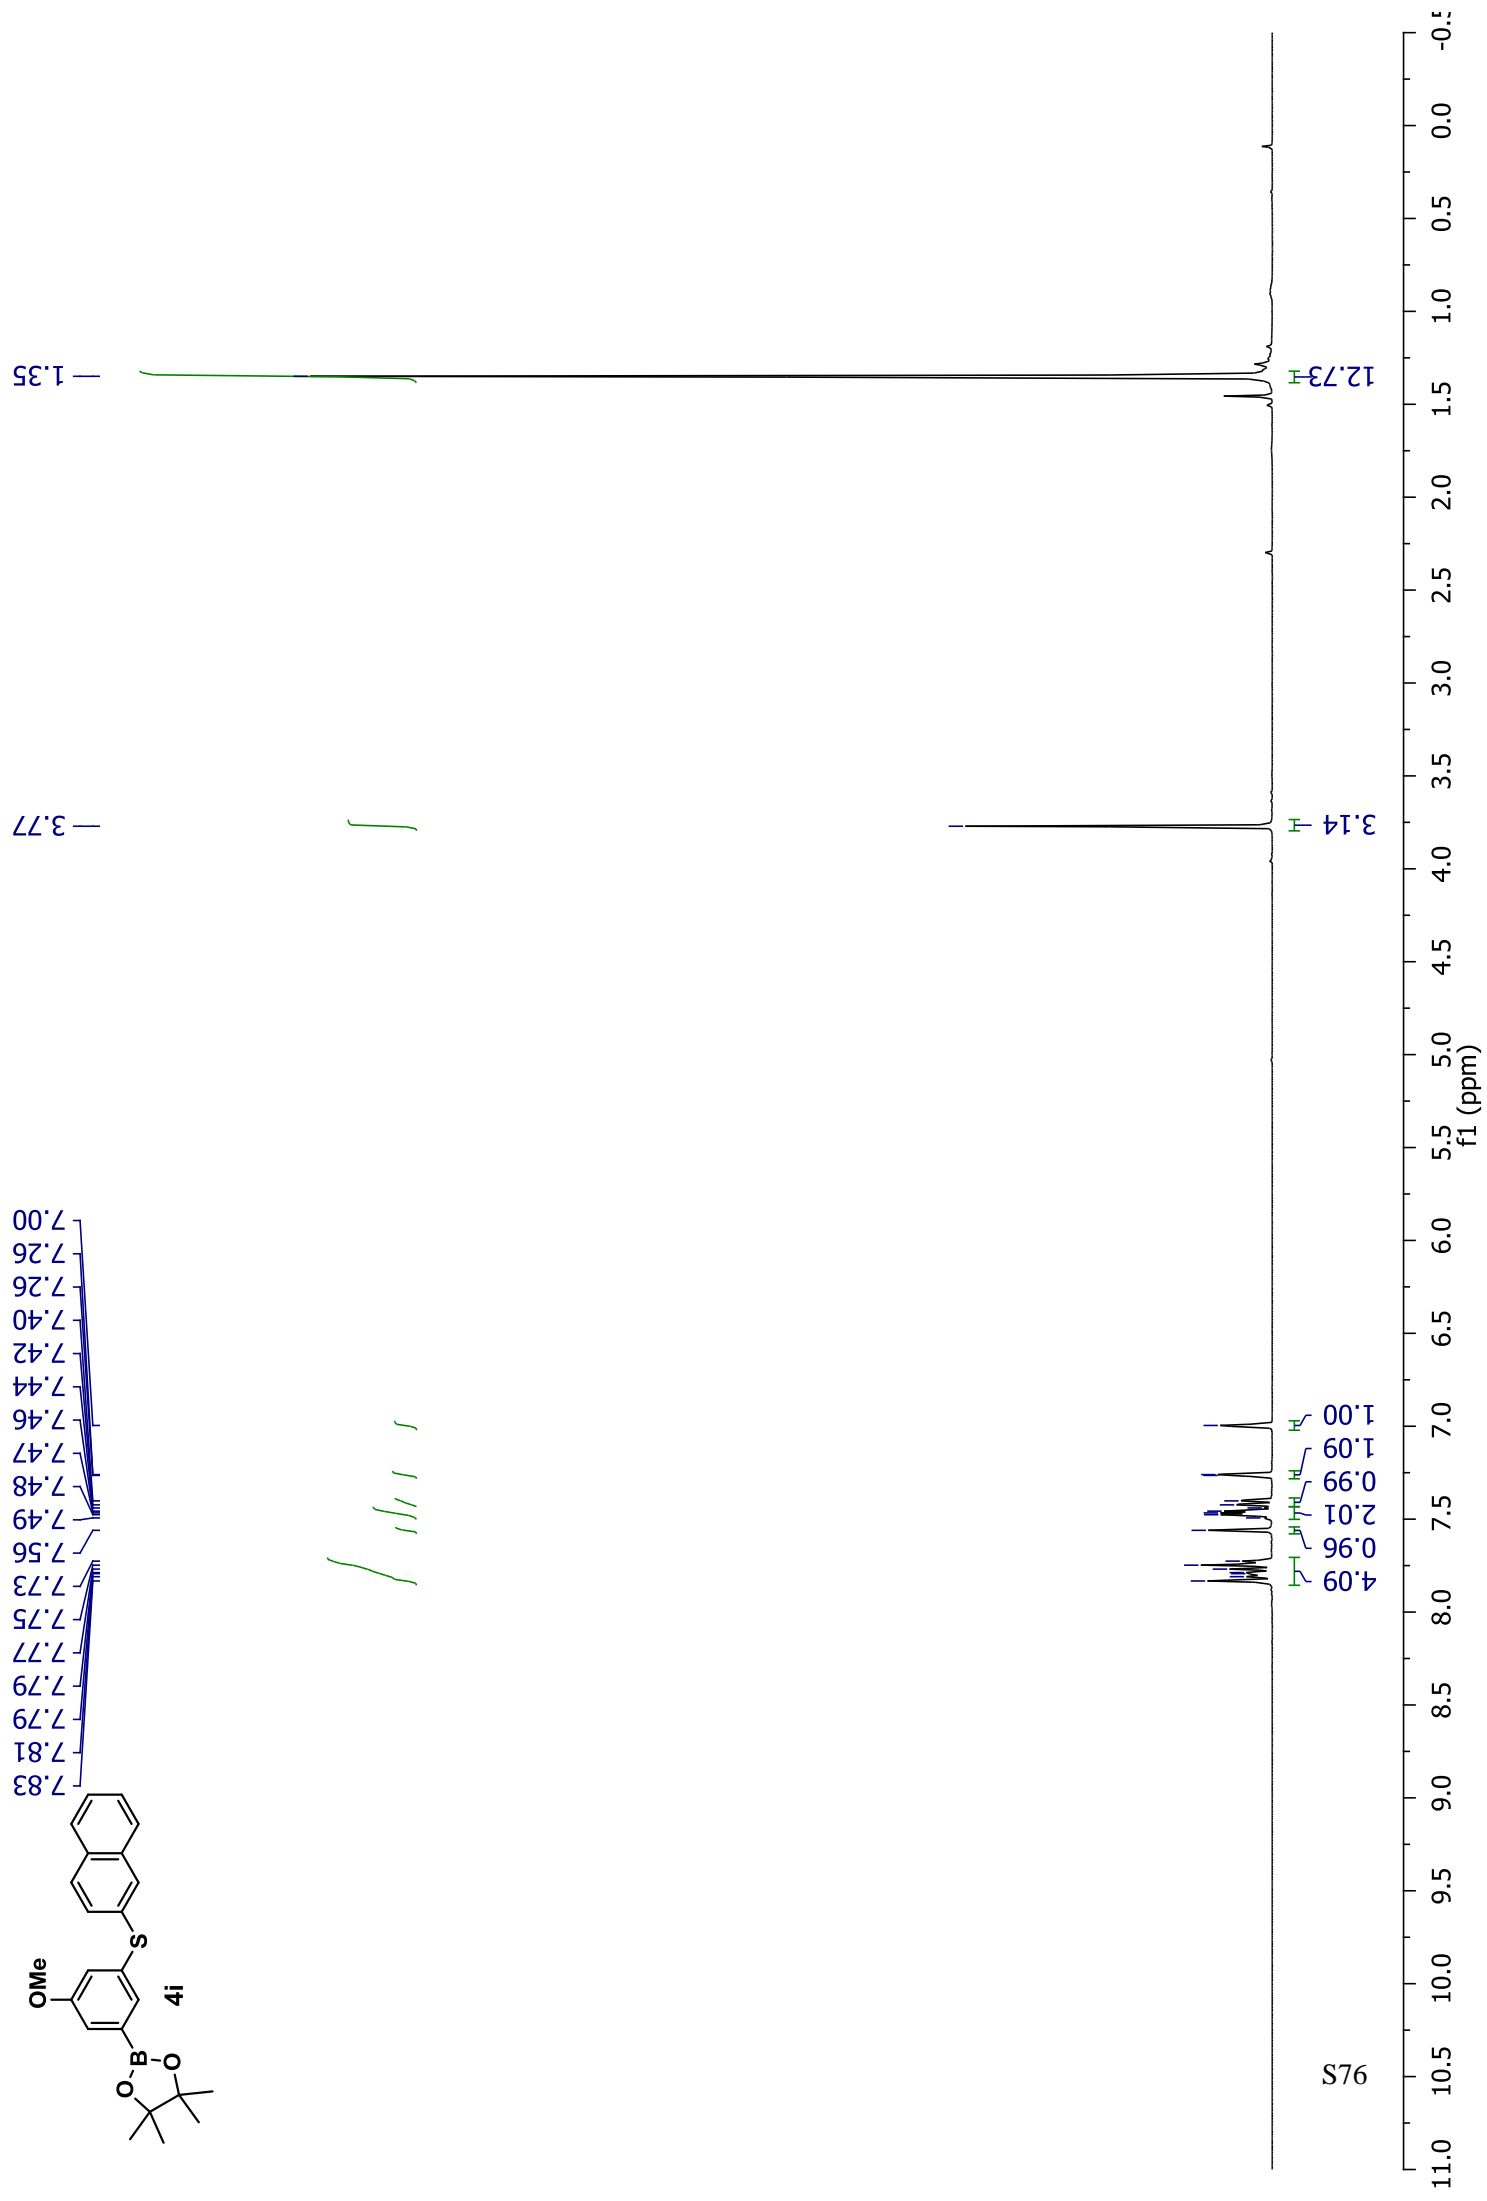

S76



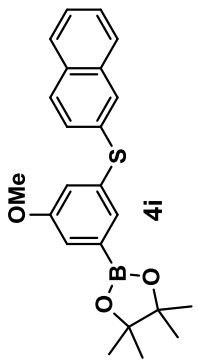

— 31.04

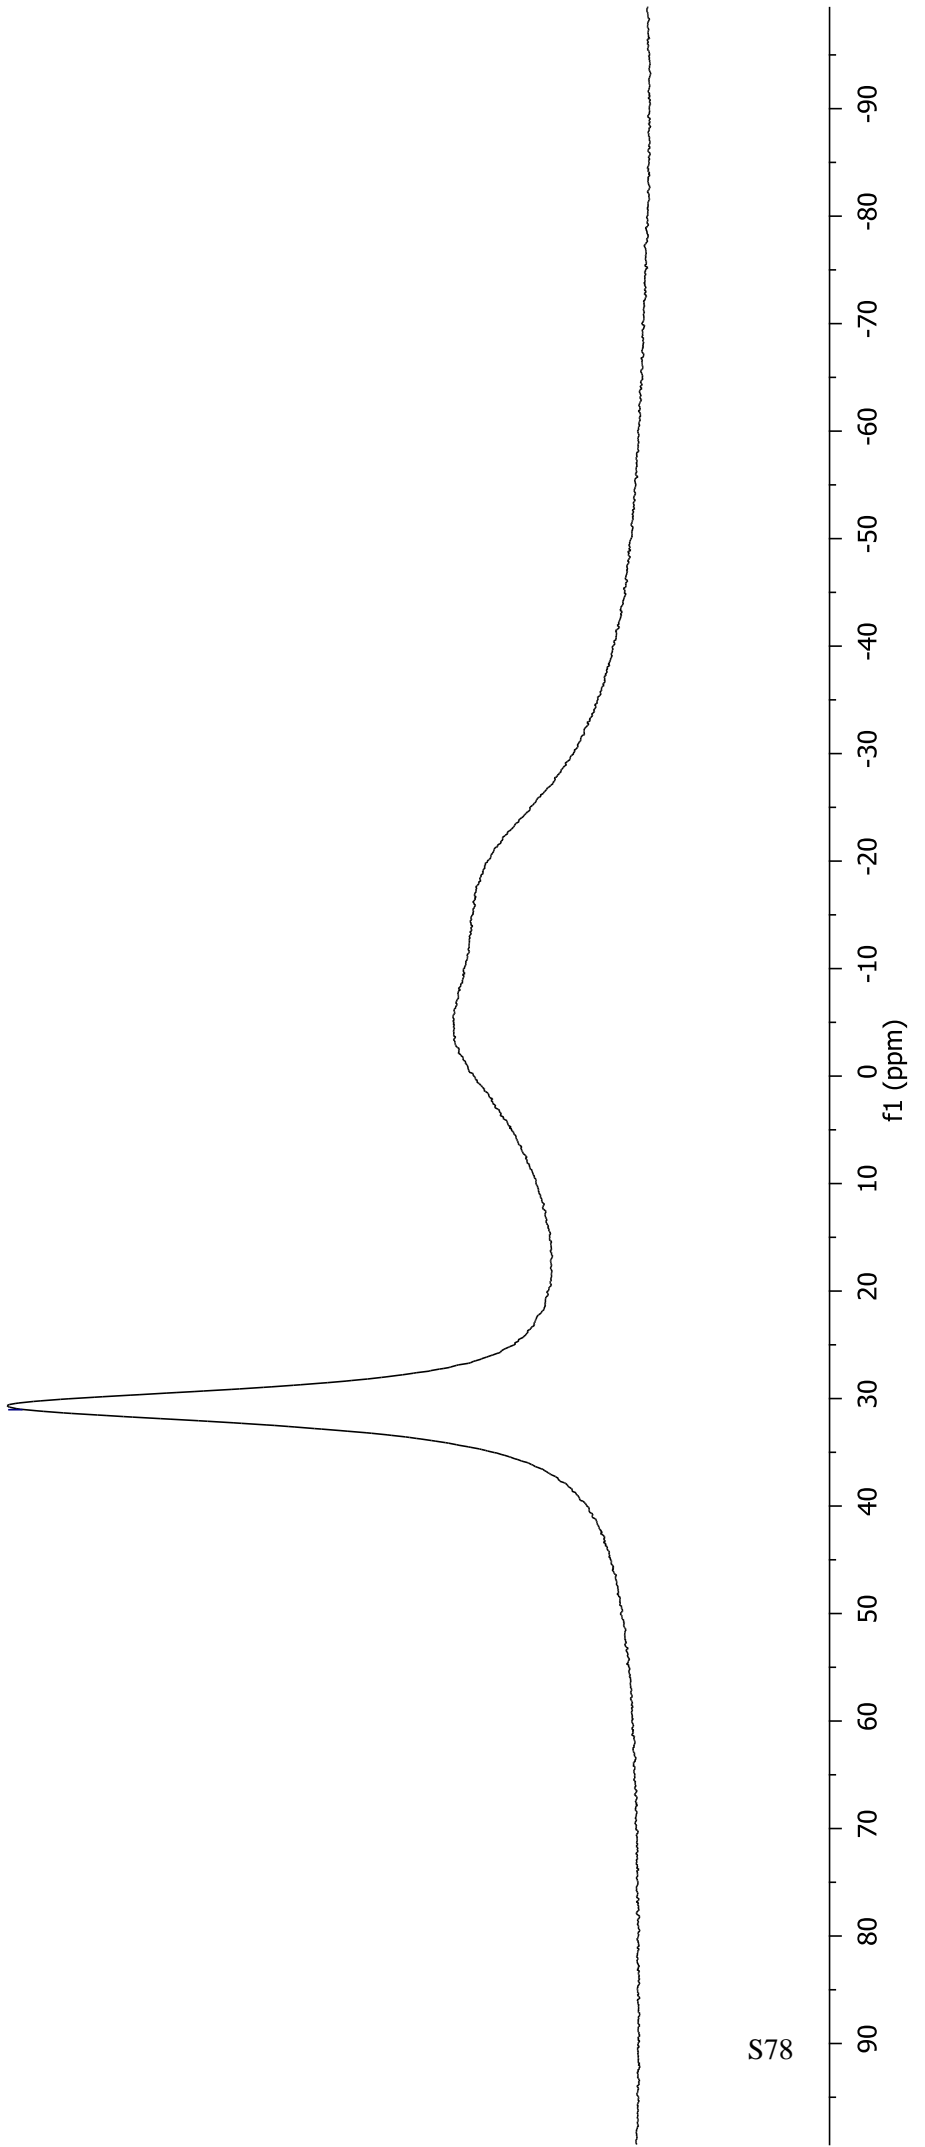

S78

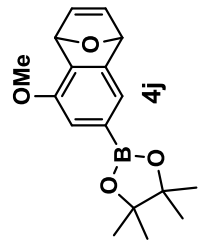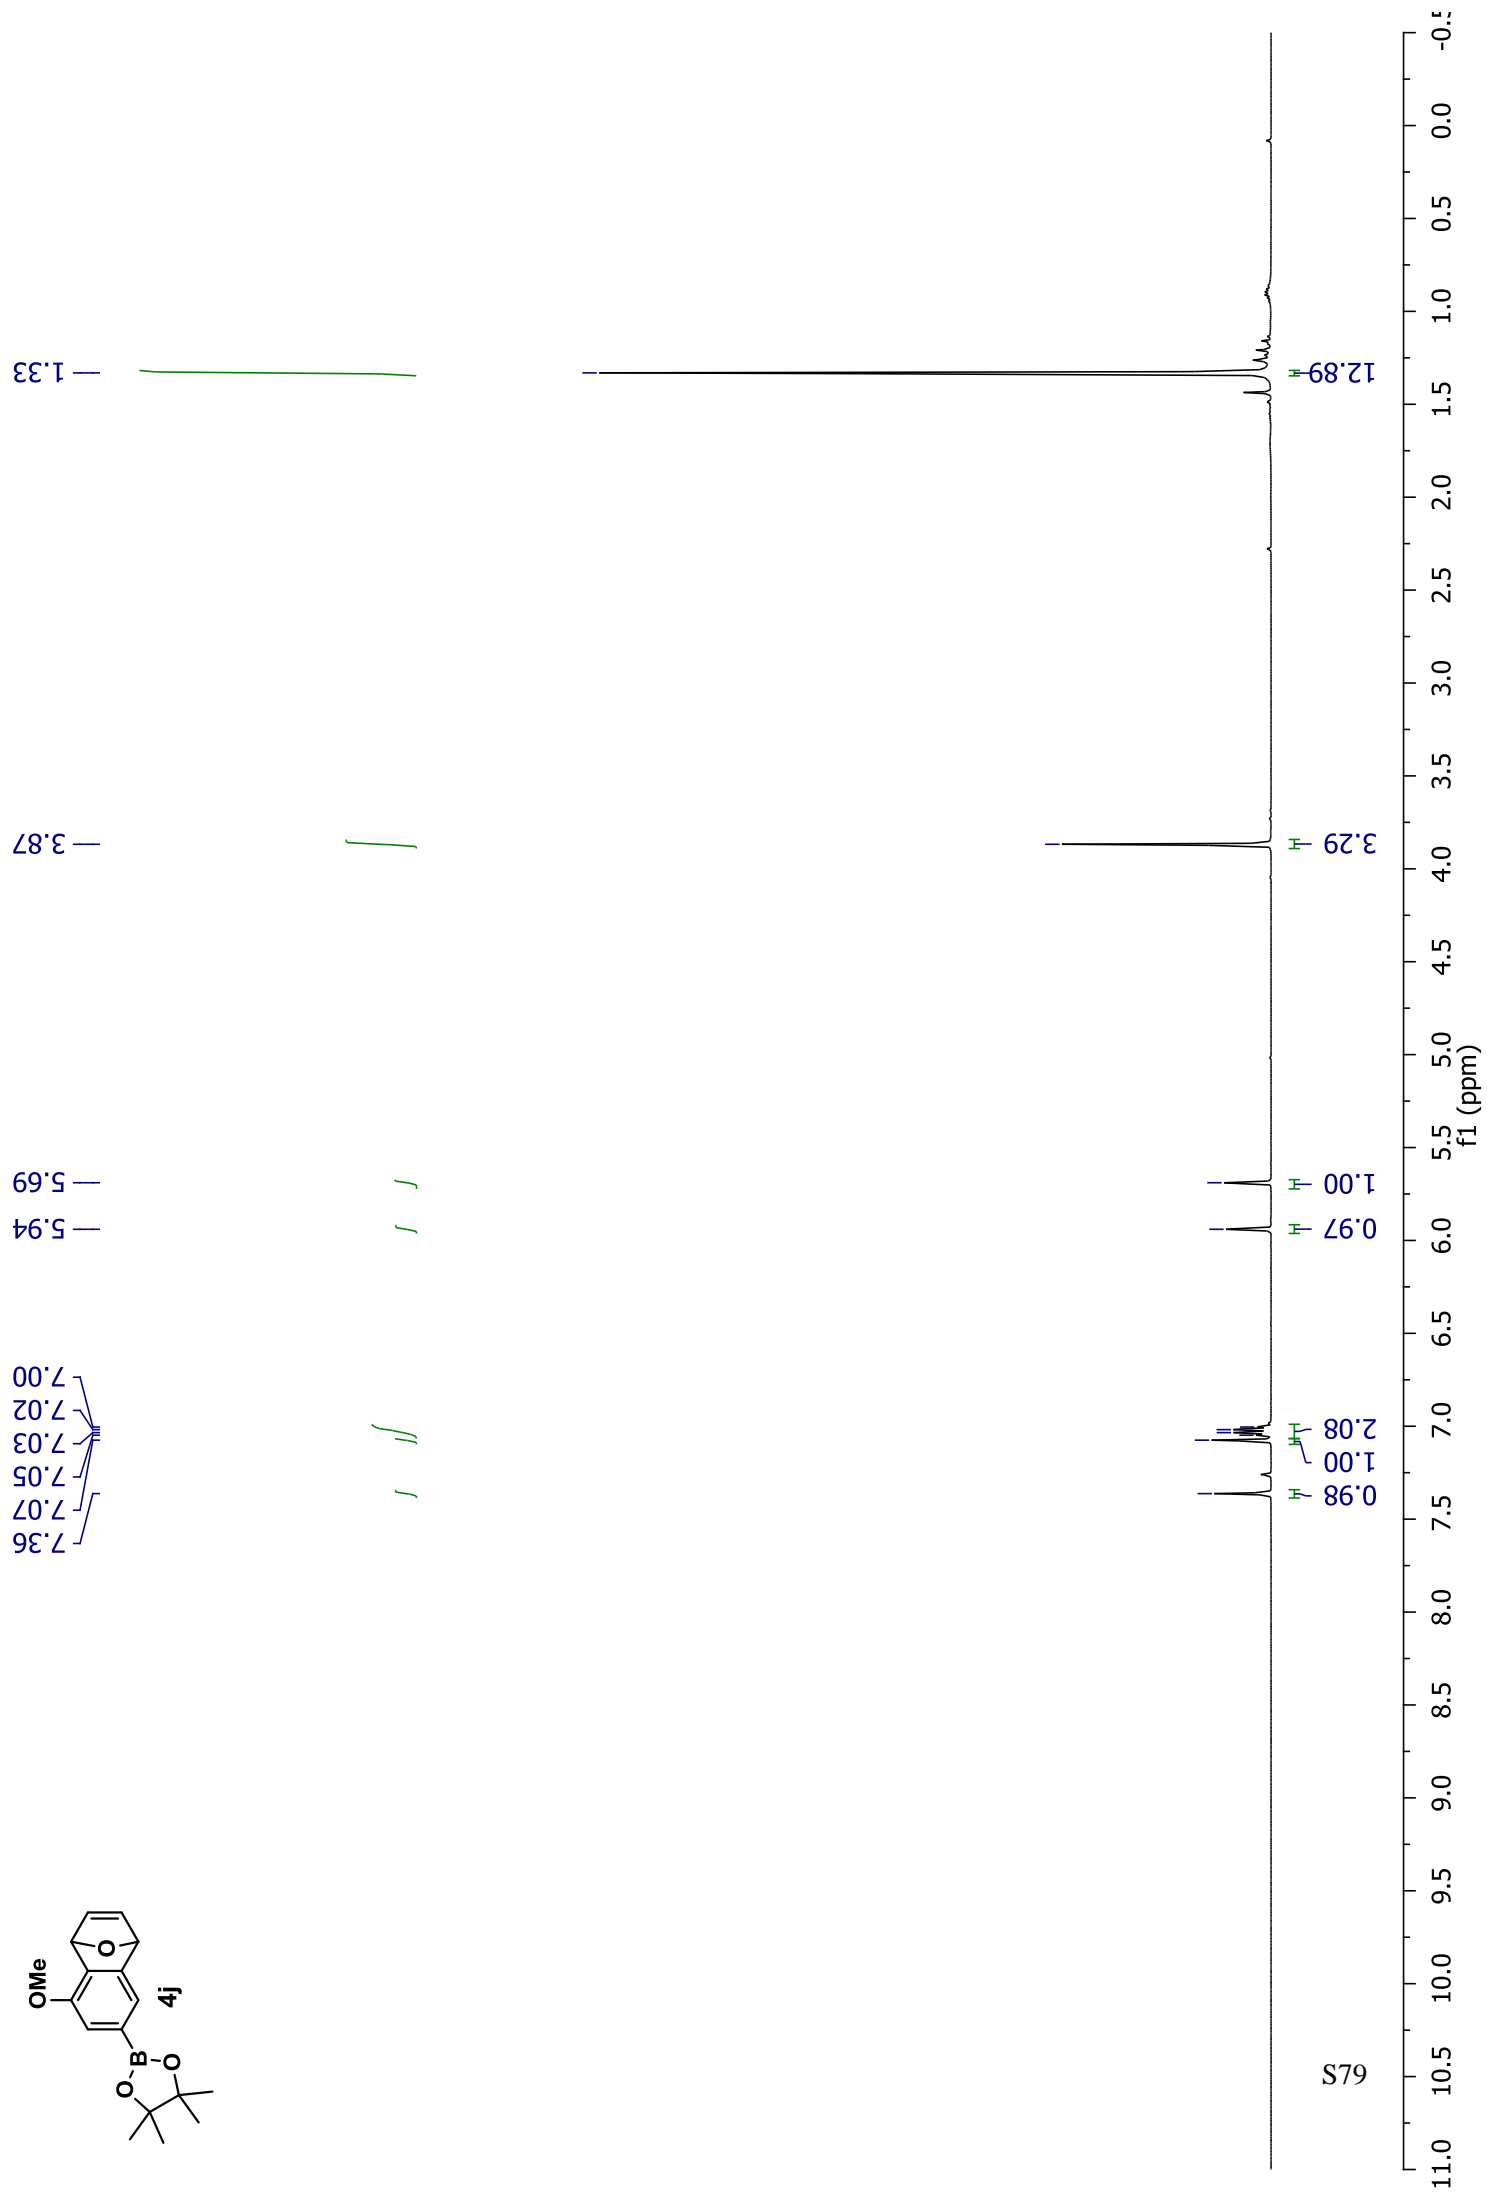



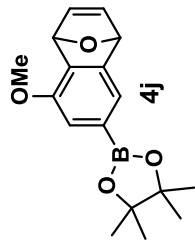

152.48  
150.86  
143.05  
142.53  
138.70  
119.17  
116.75  
83.70  
82.36  
79.90  
55.62  
24.76  
24.70

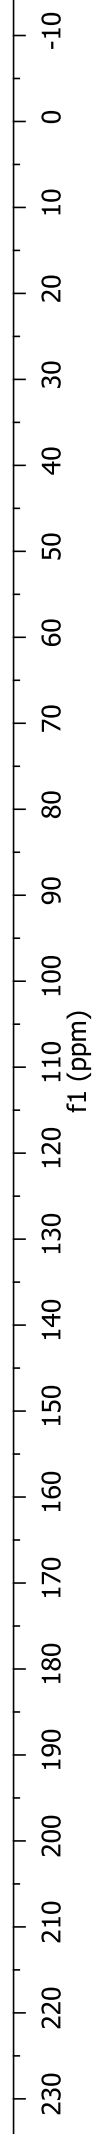

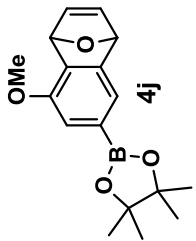

— 30.47

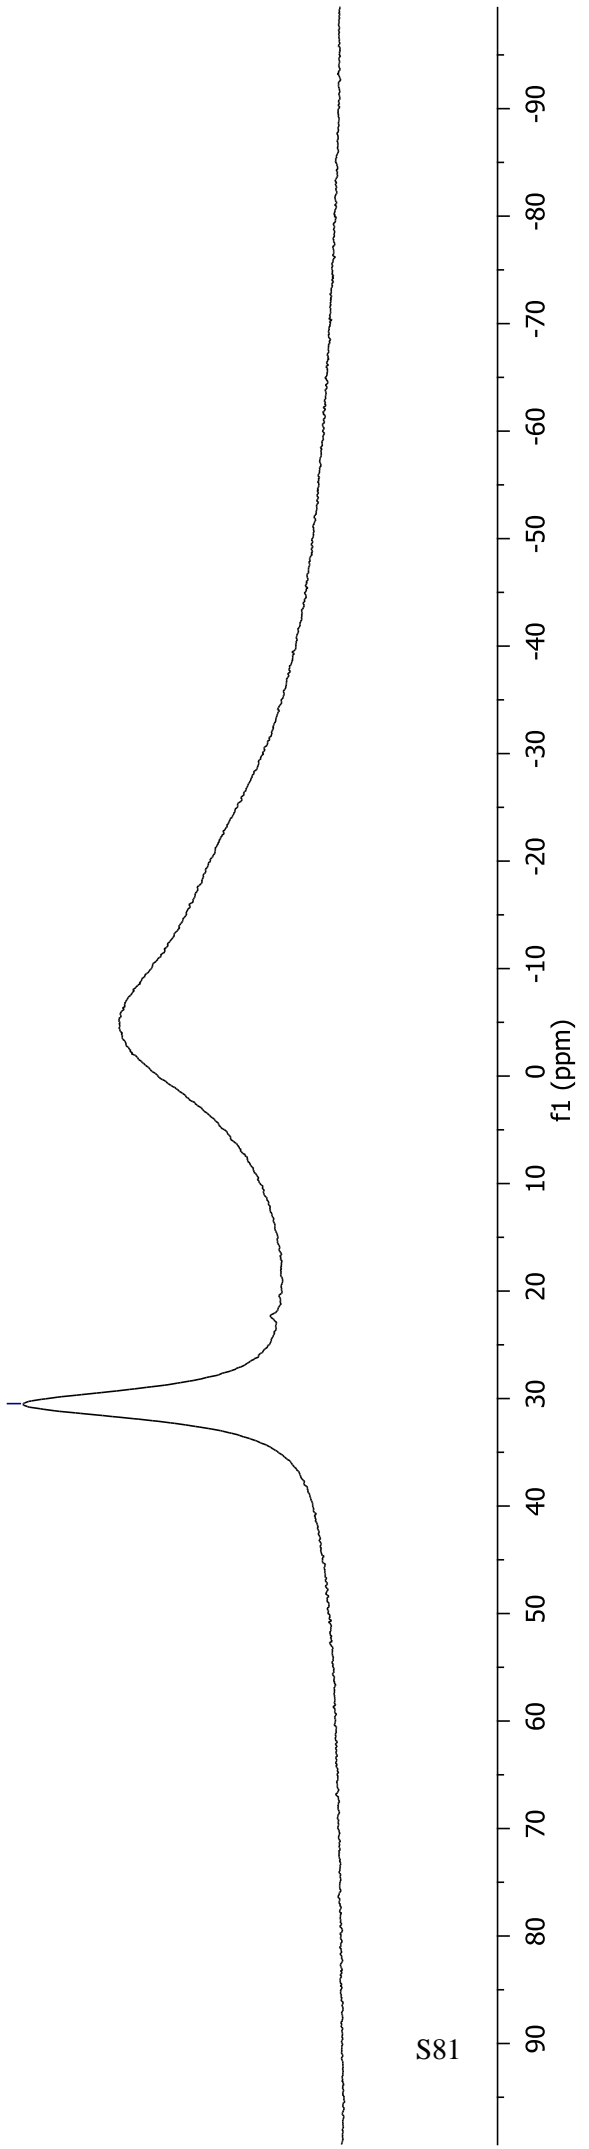

188

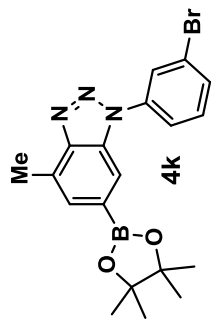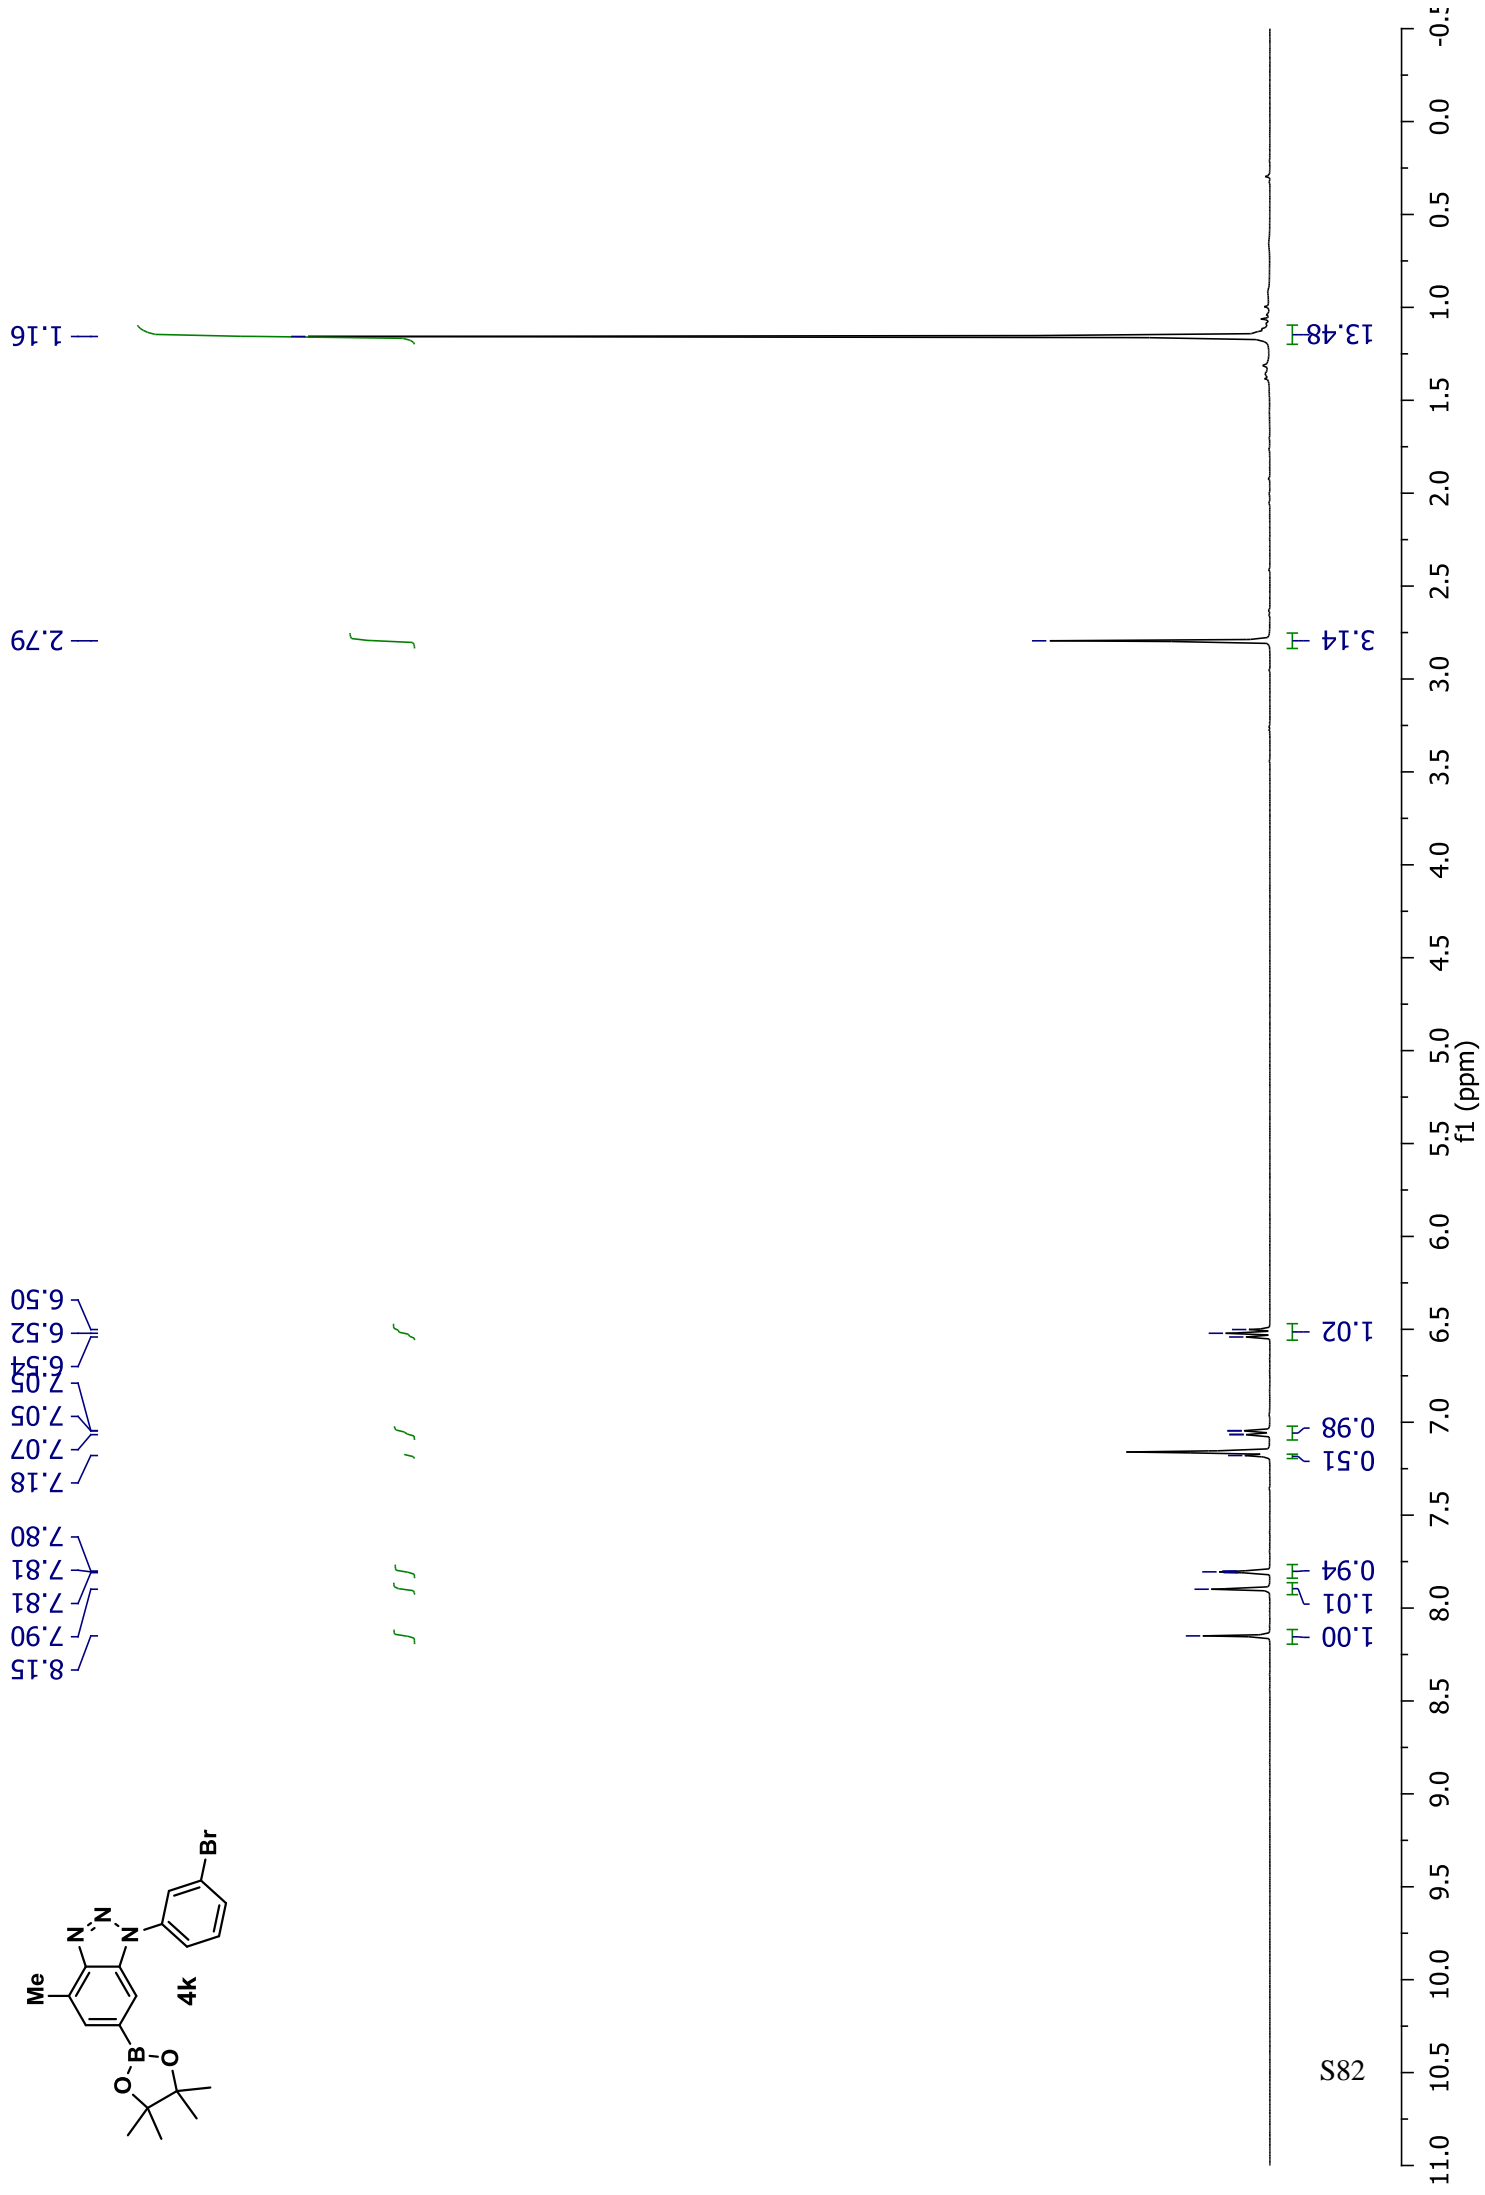

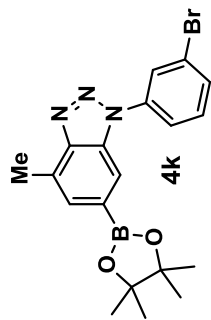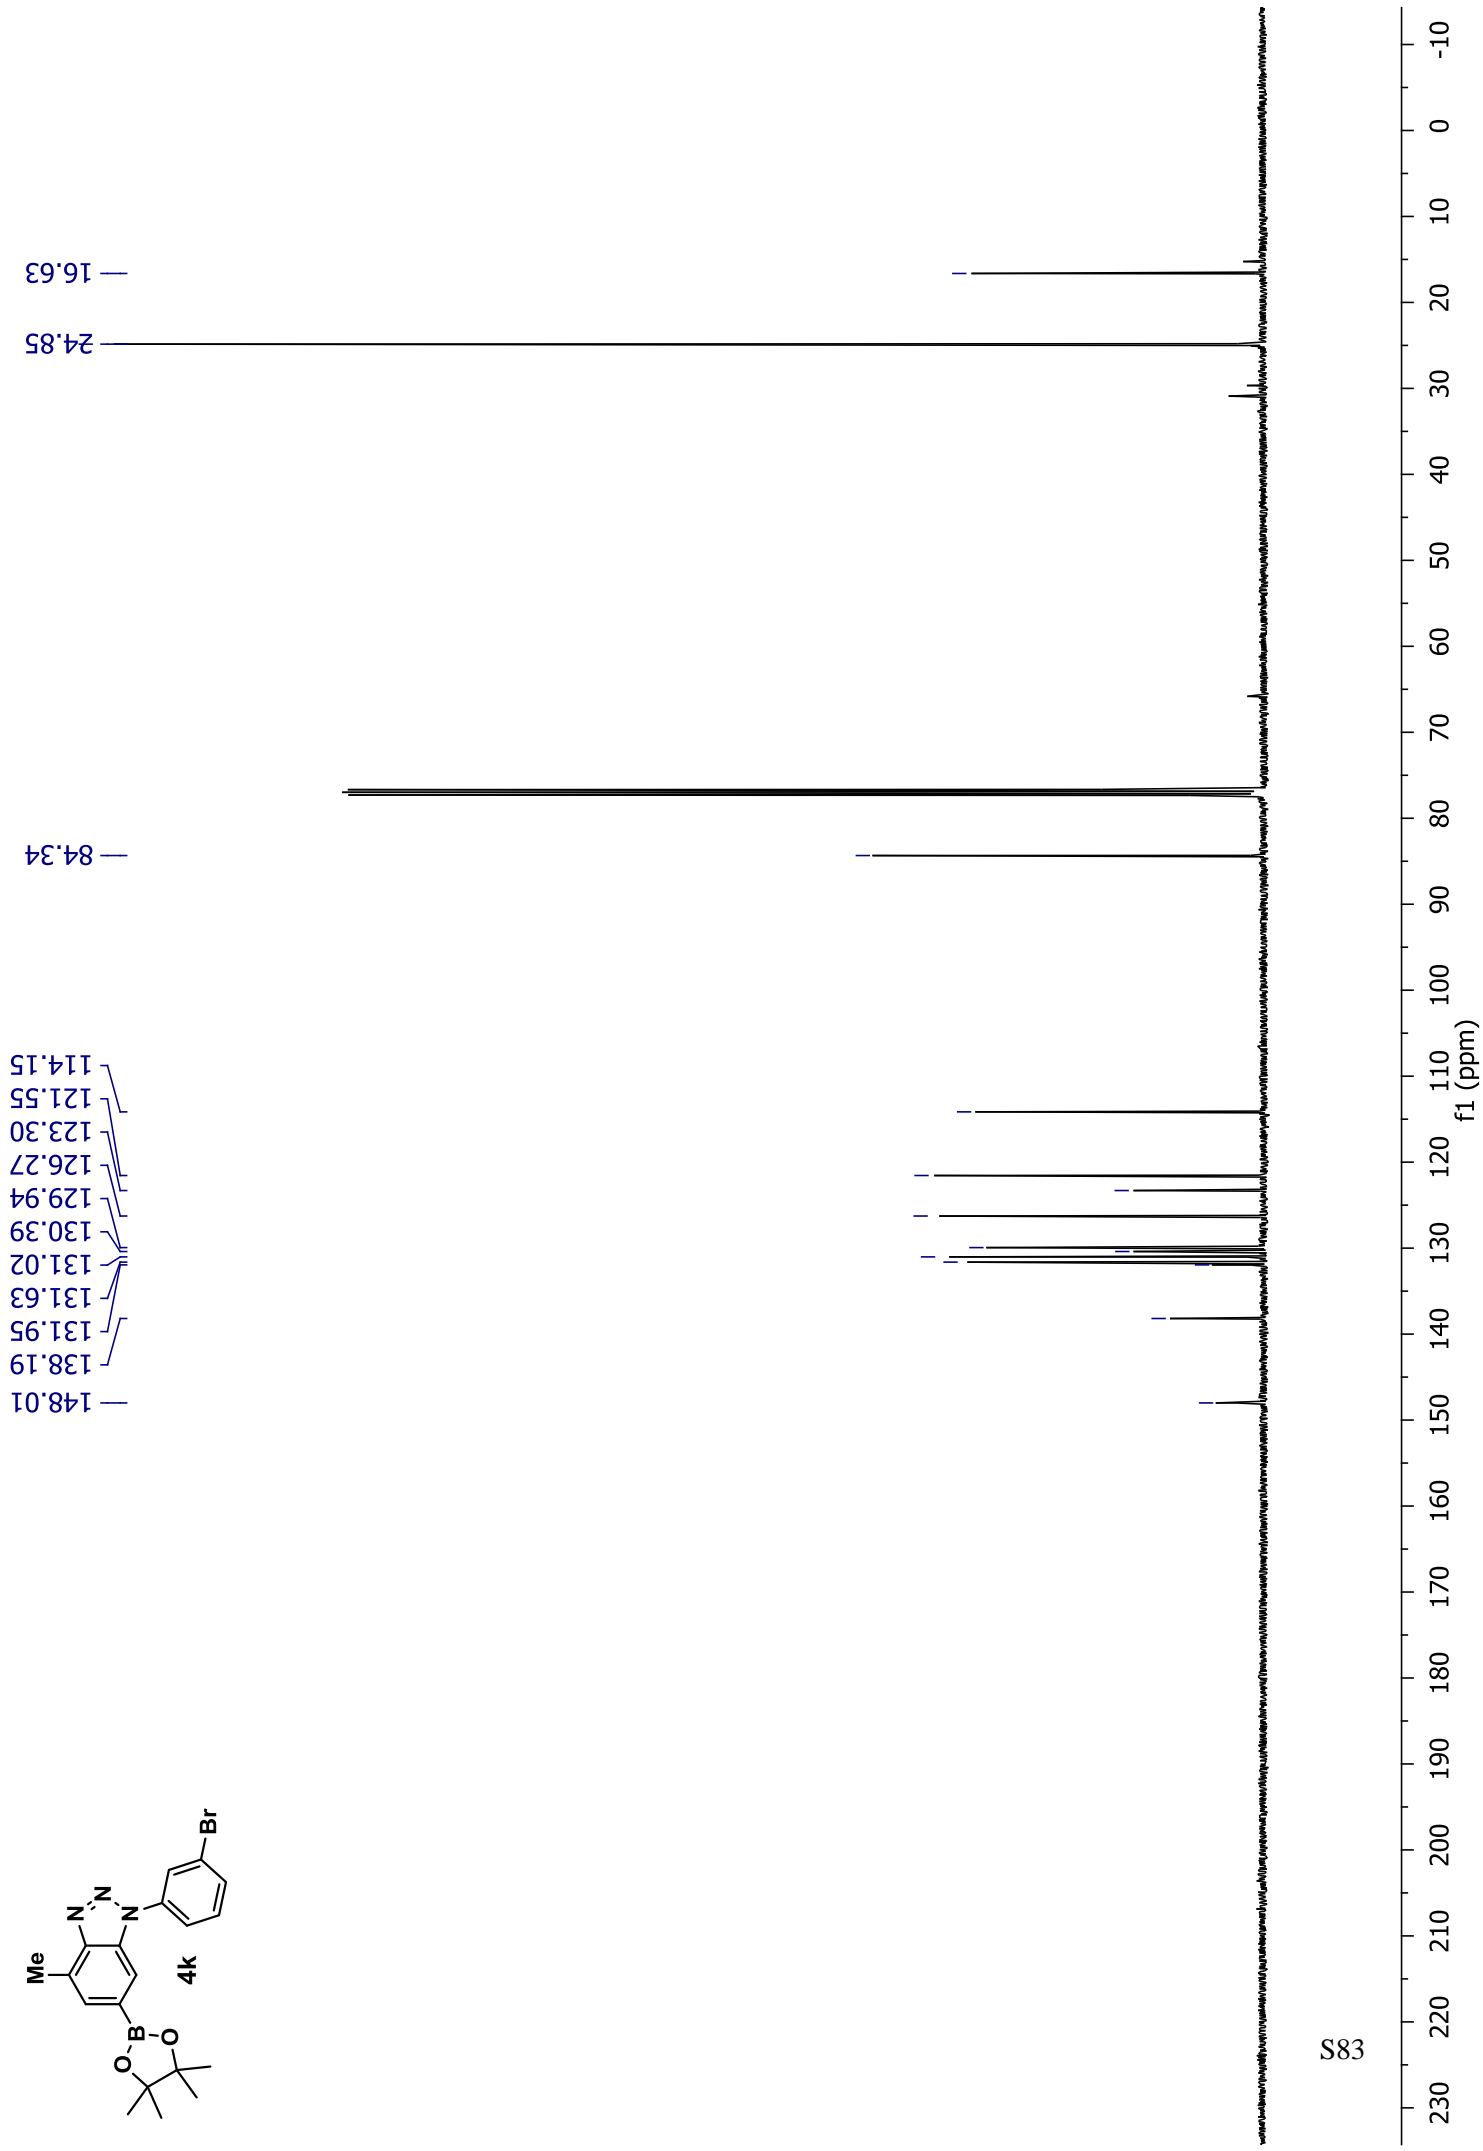

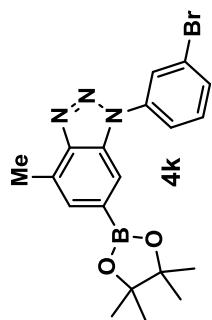

— 30.92

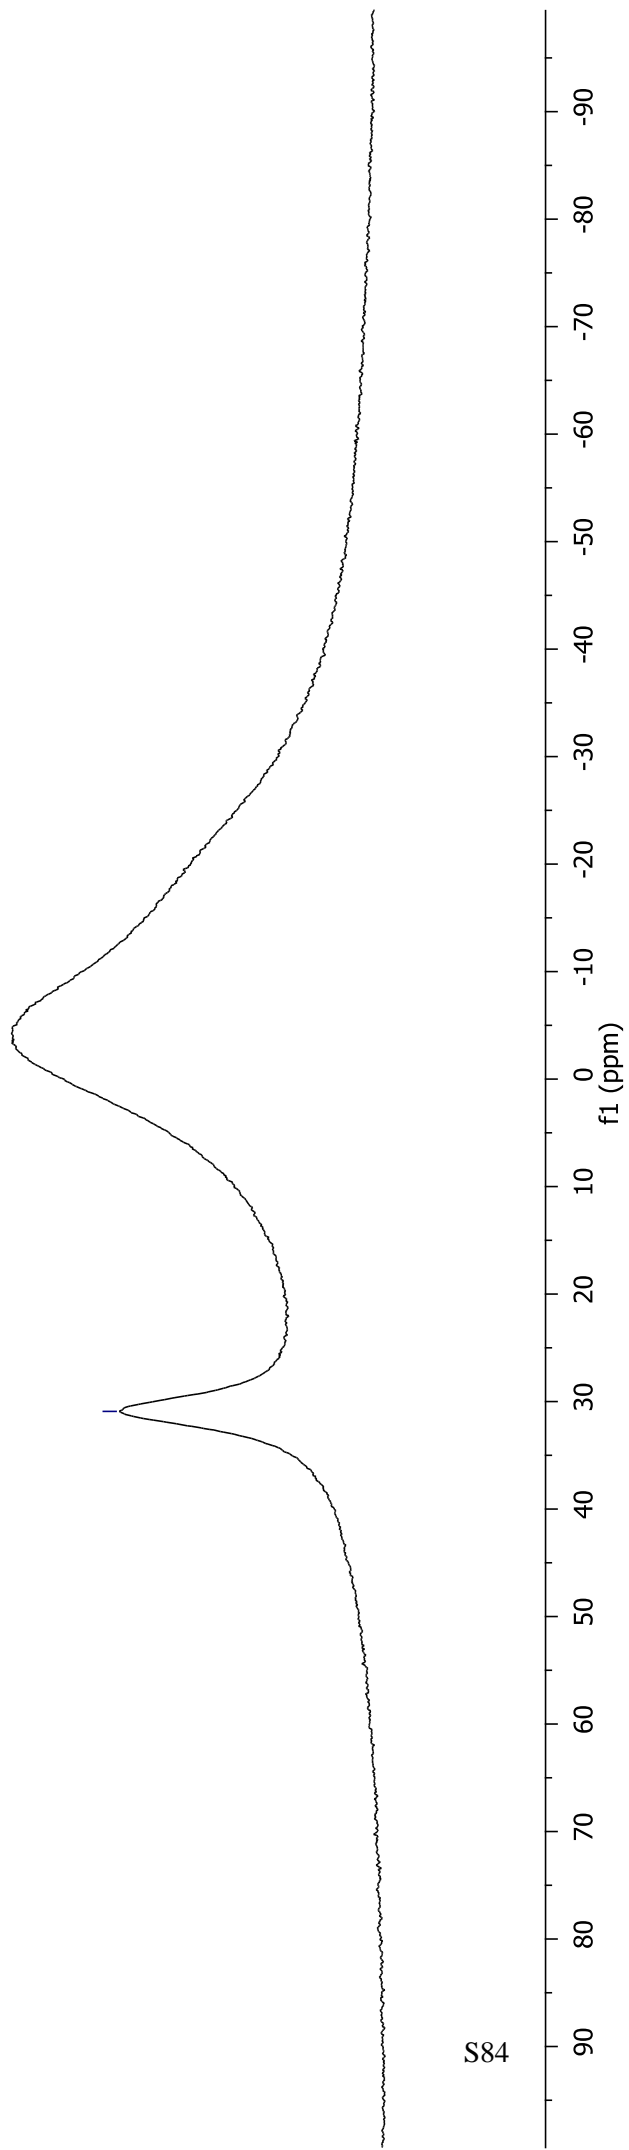

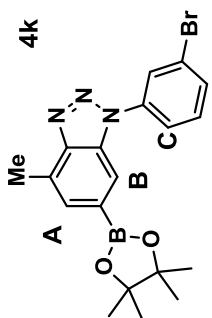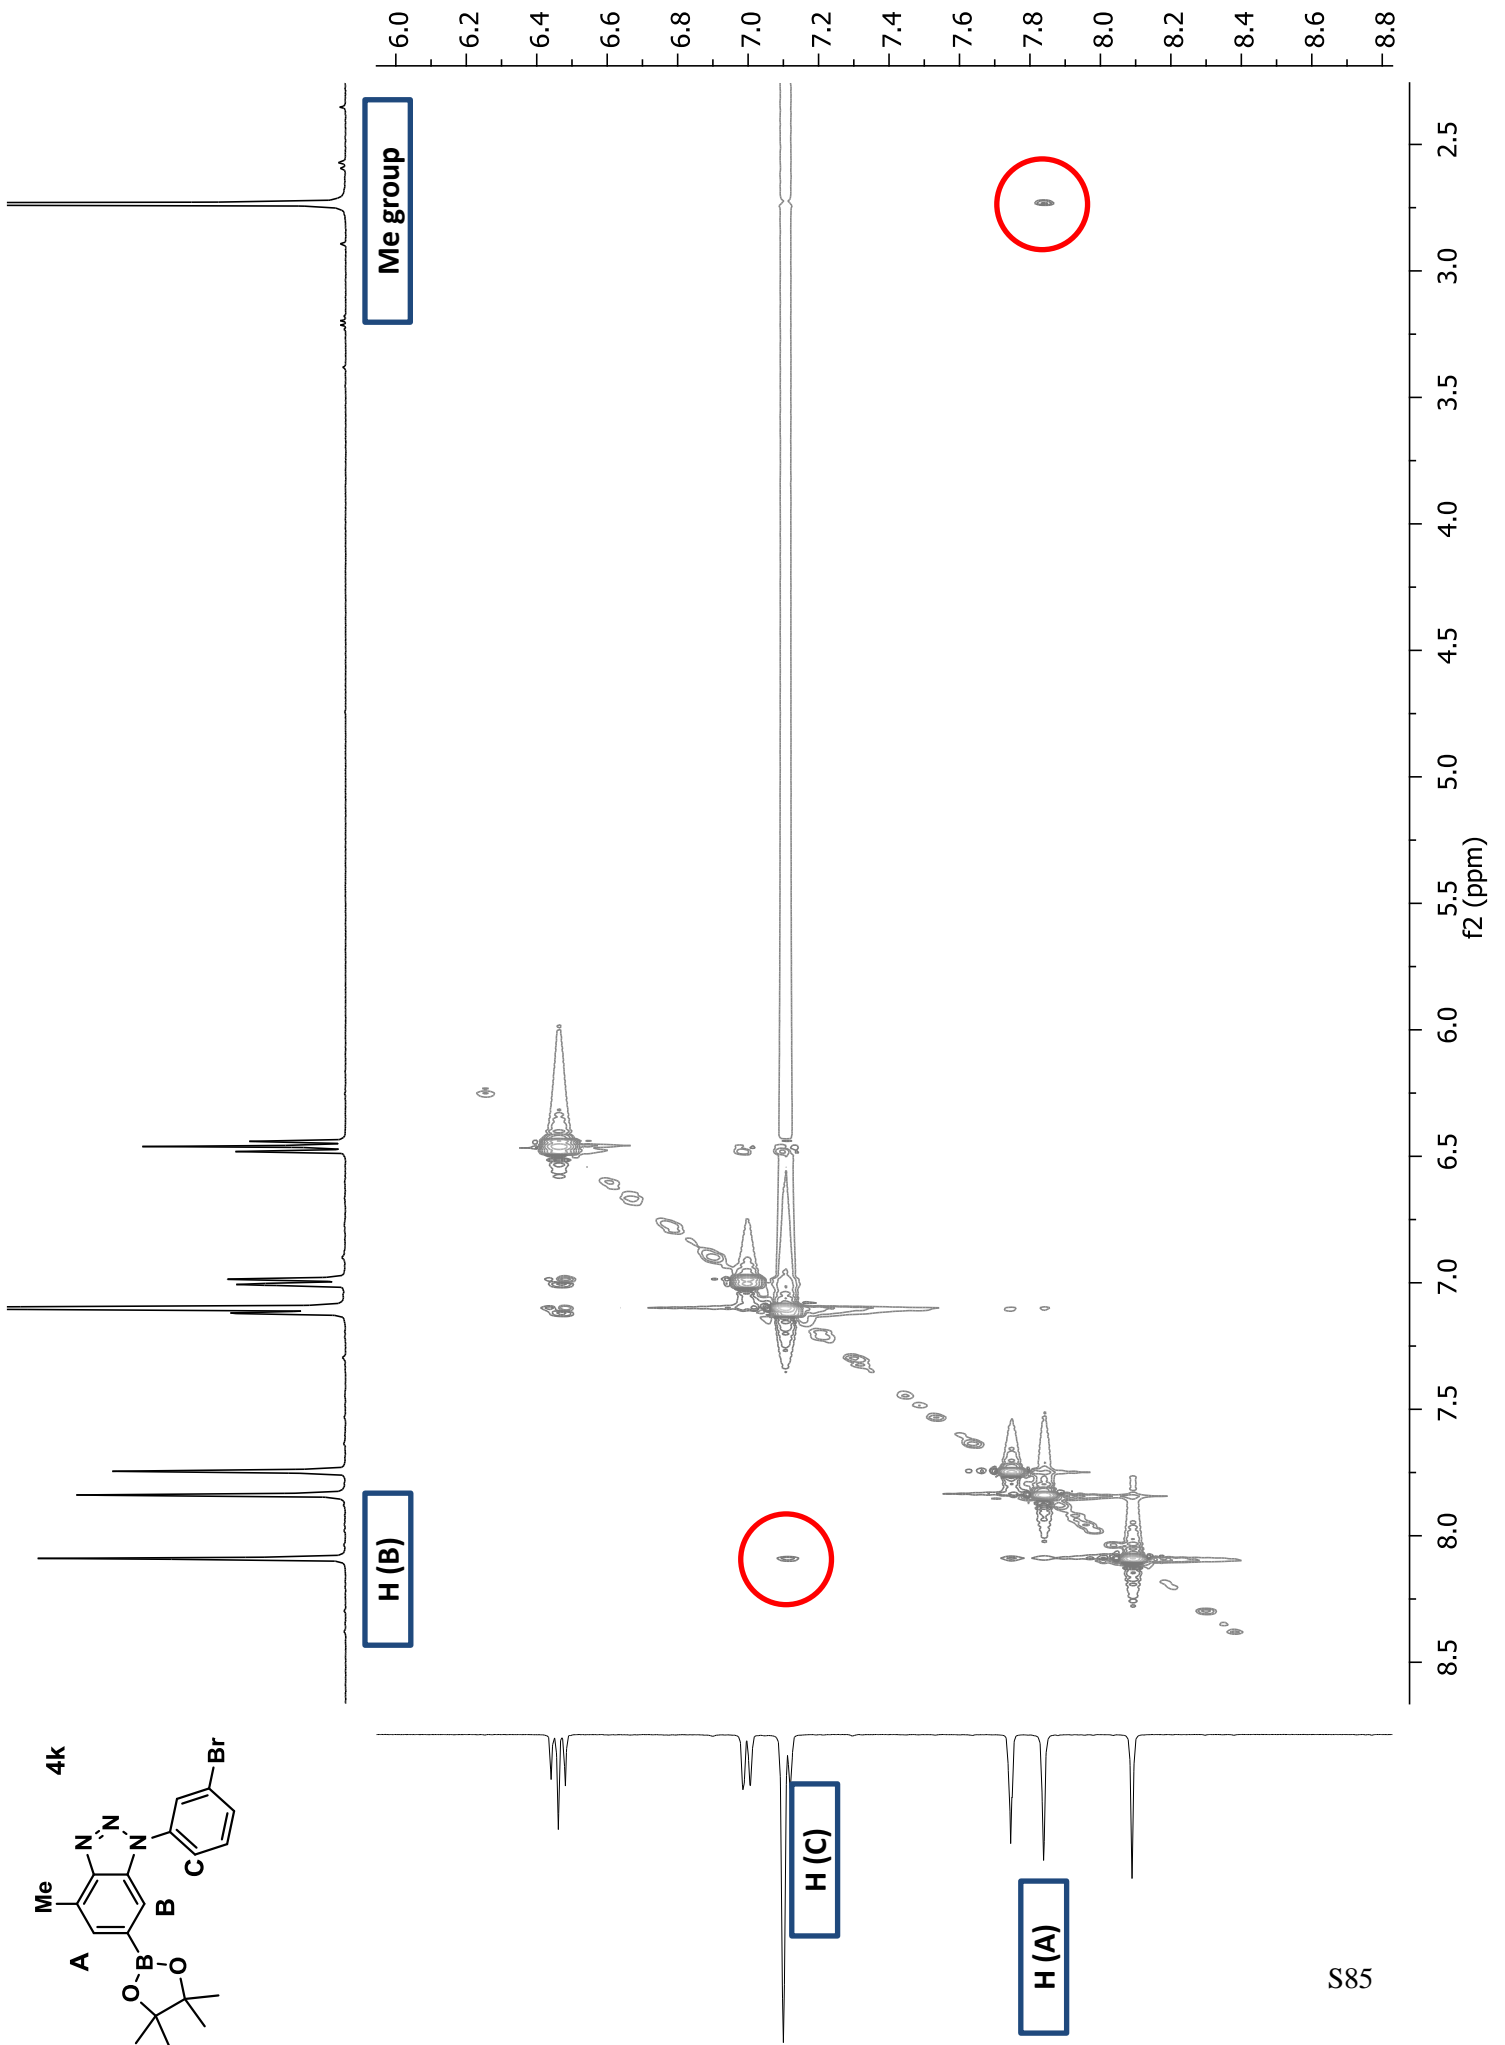

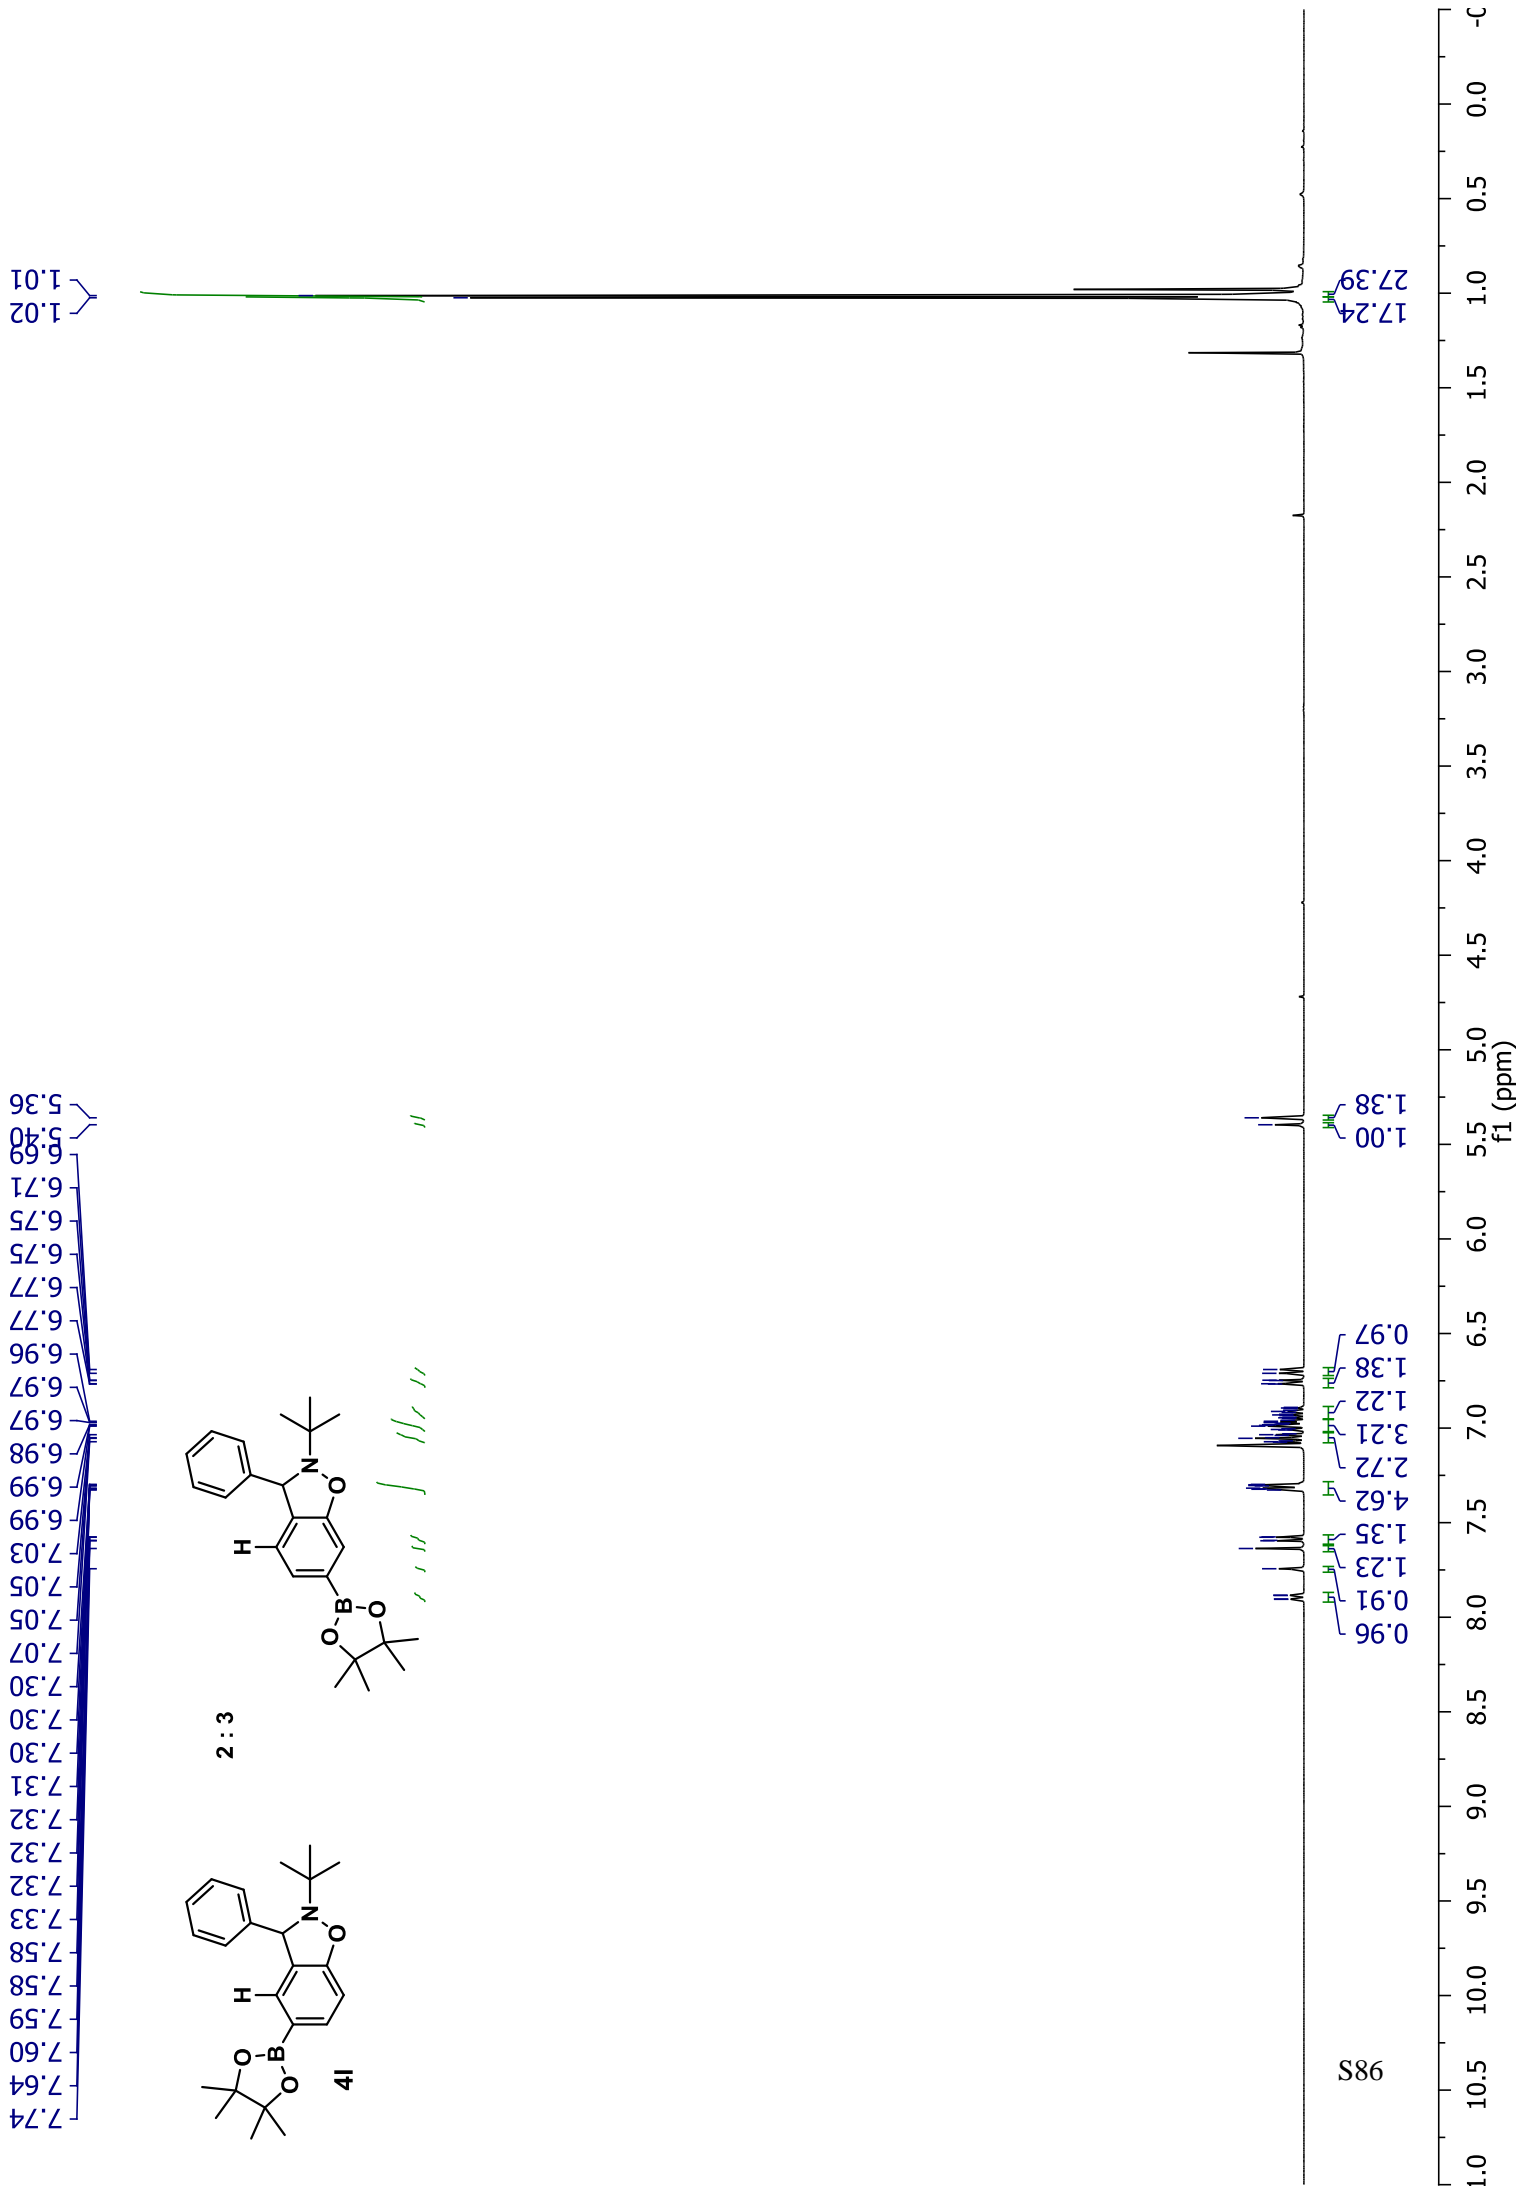

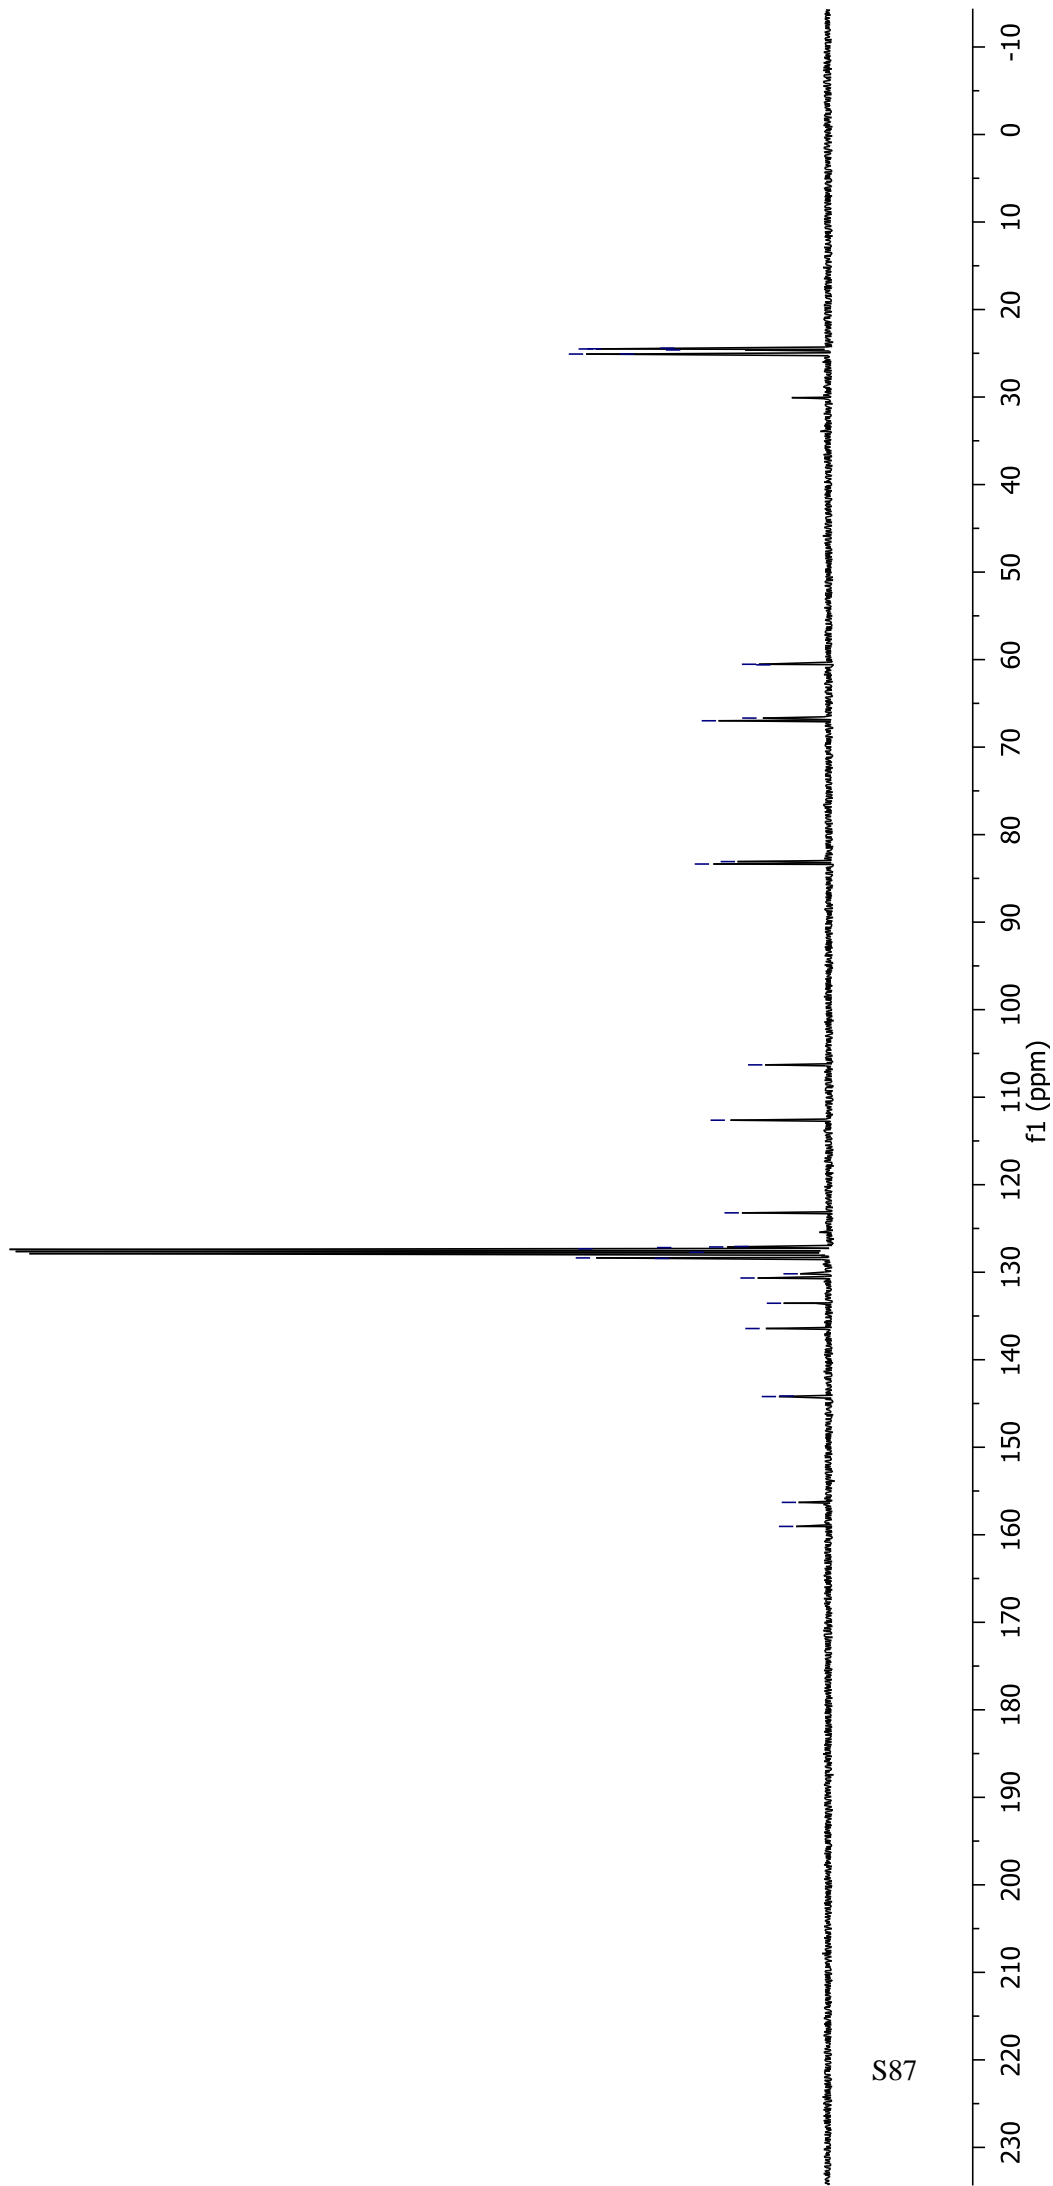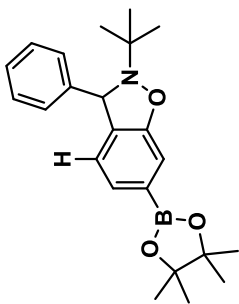

2 : 3

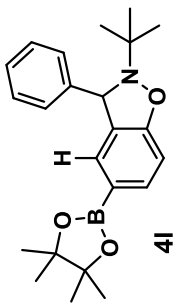

4I

24.42  
24.49  
24.50  
24.62  
25.07  
25.09

60.53  
60.60  
66.68  
66.99

83.08  
83.36

106.31

122.63  
127.11  
127.19  
127.33  
127.72  
128.36  
128.42

144.15  
144.21

156.30  
159.05



— 30.77

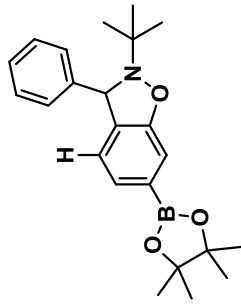

2:3

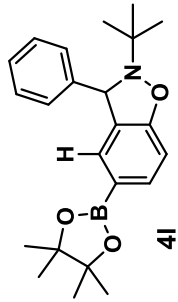

4I

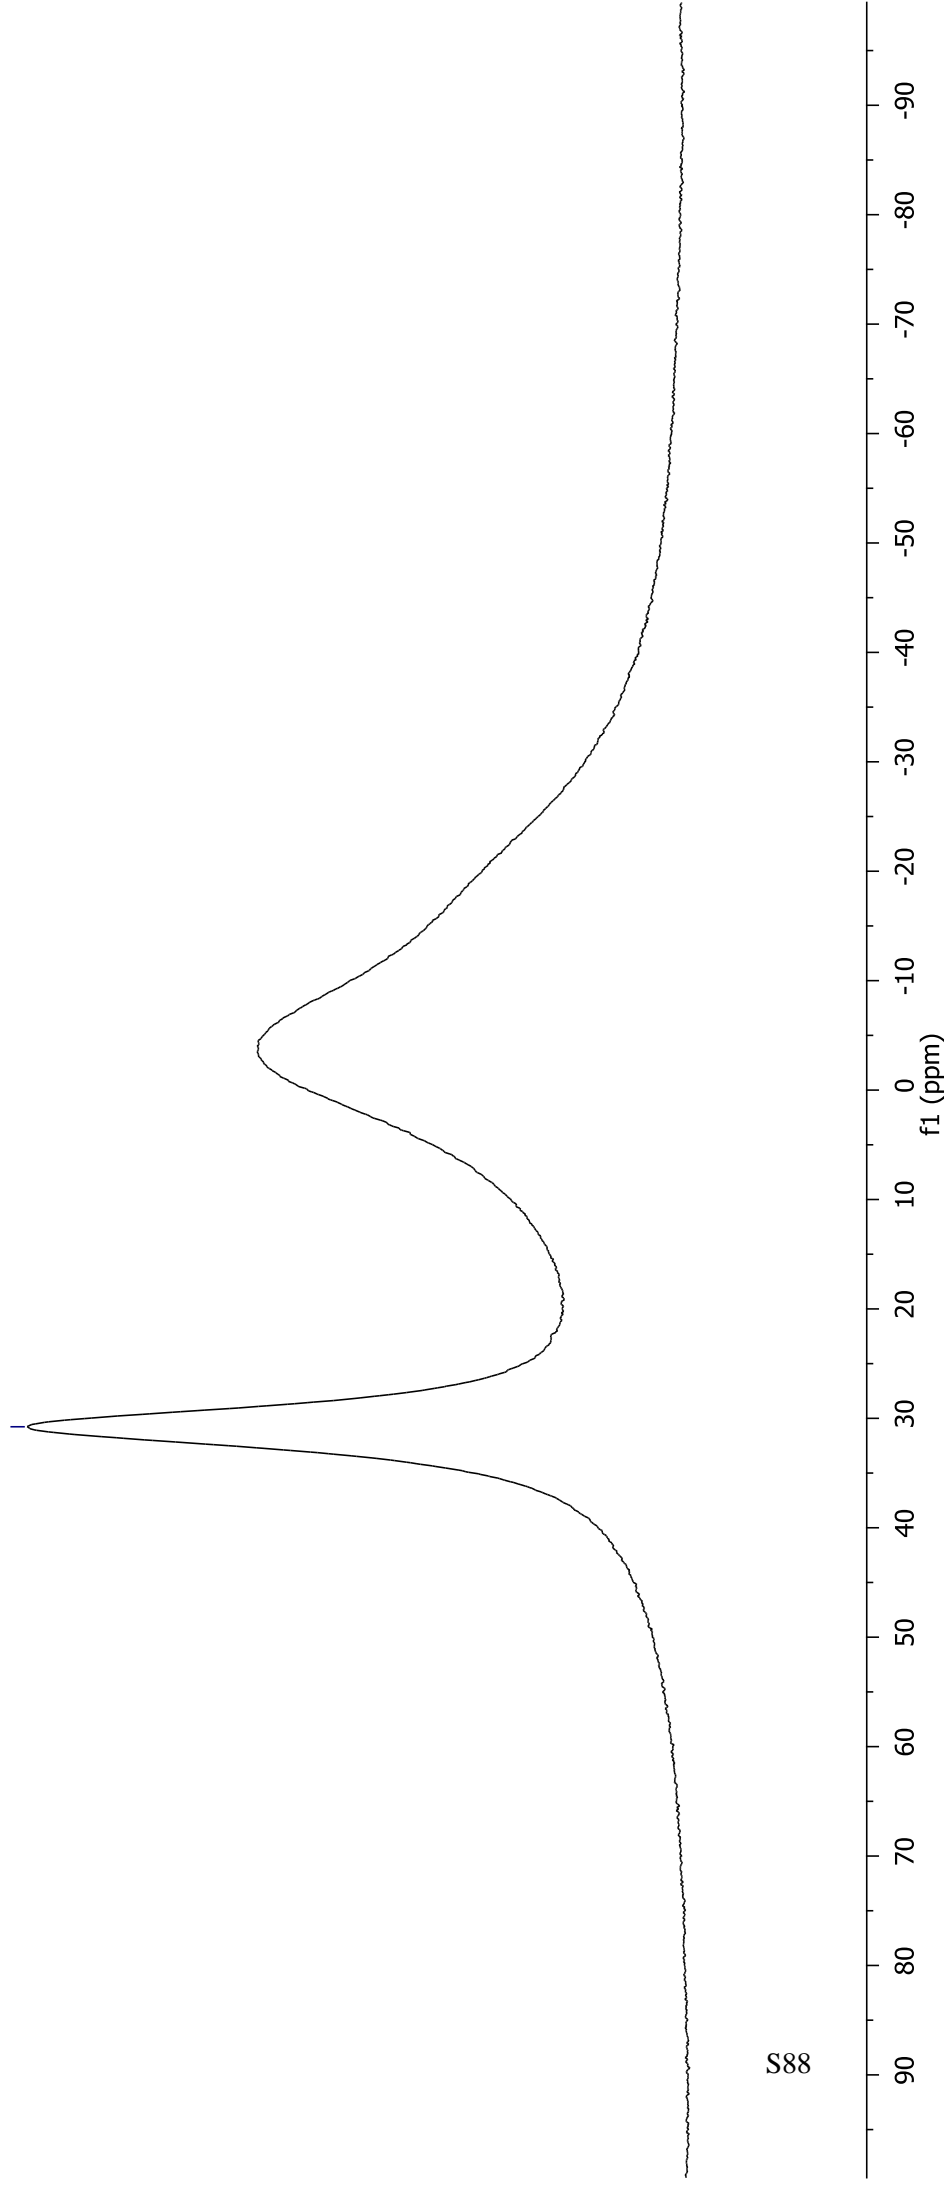

S88



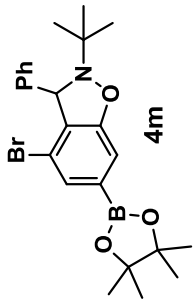

7.46  
7.32  
7.30  
7.28  
7.26  
7.26  
7.23  
— 5.53

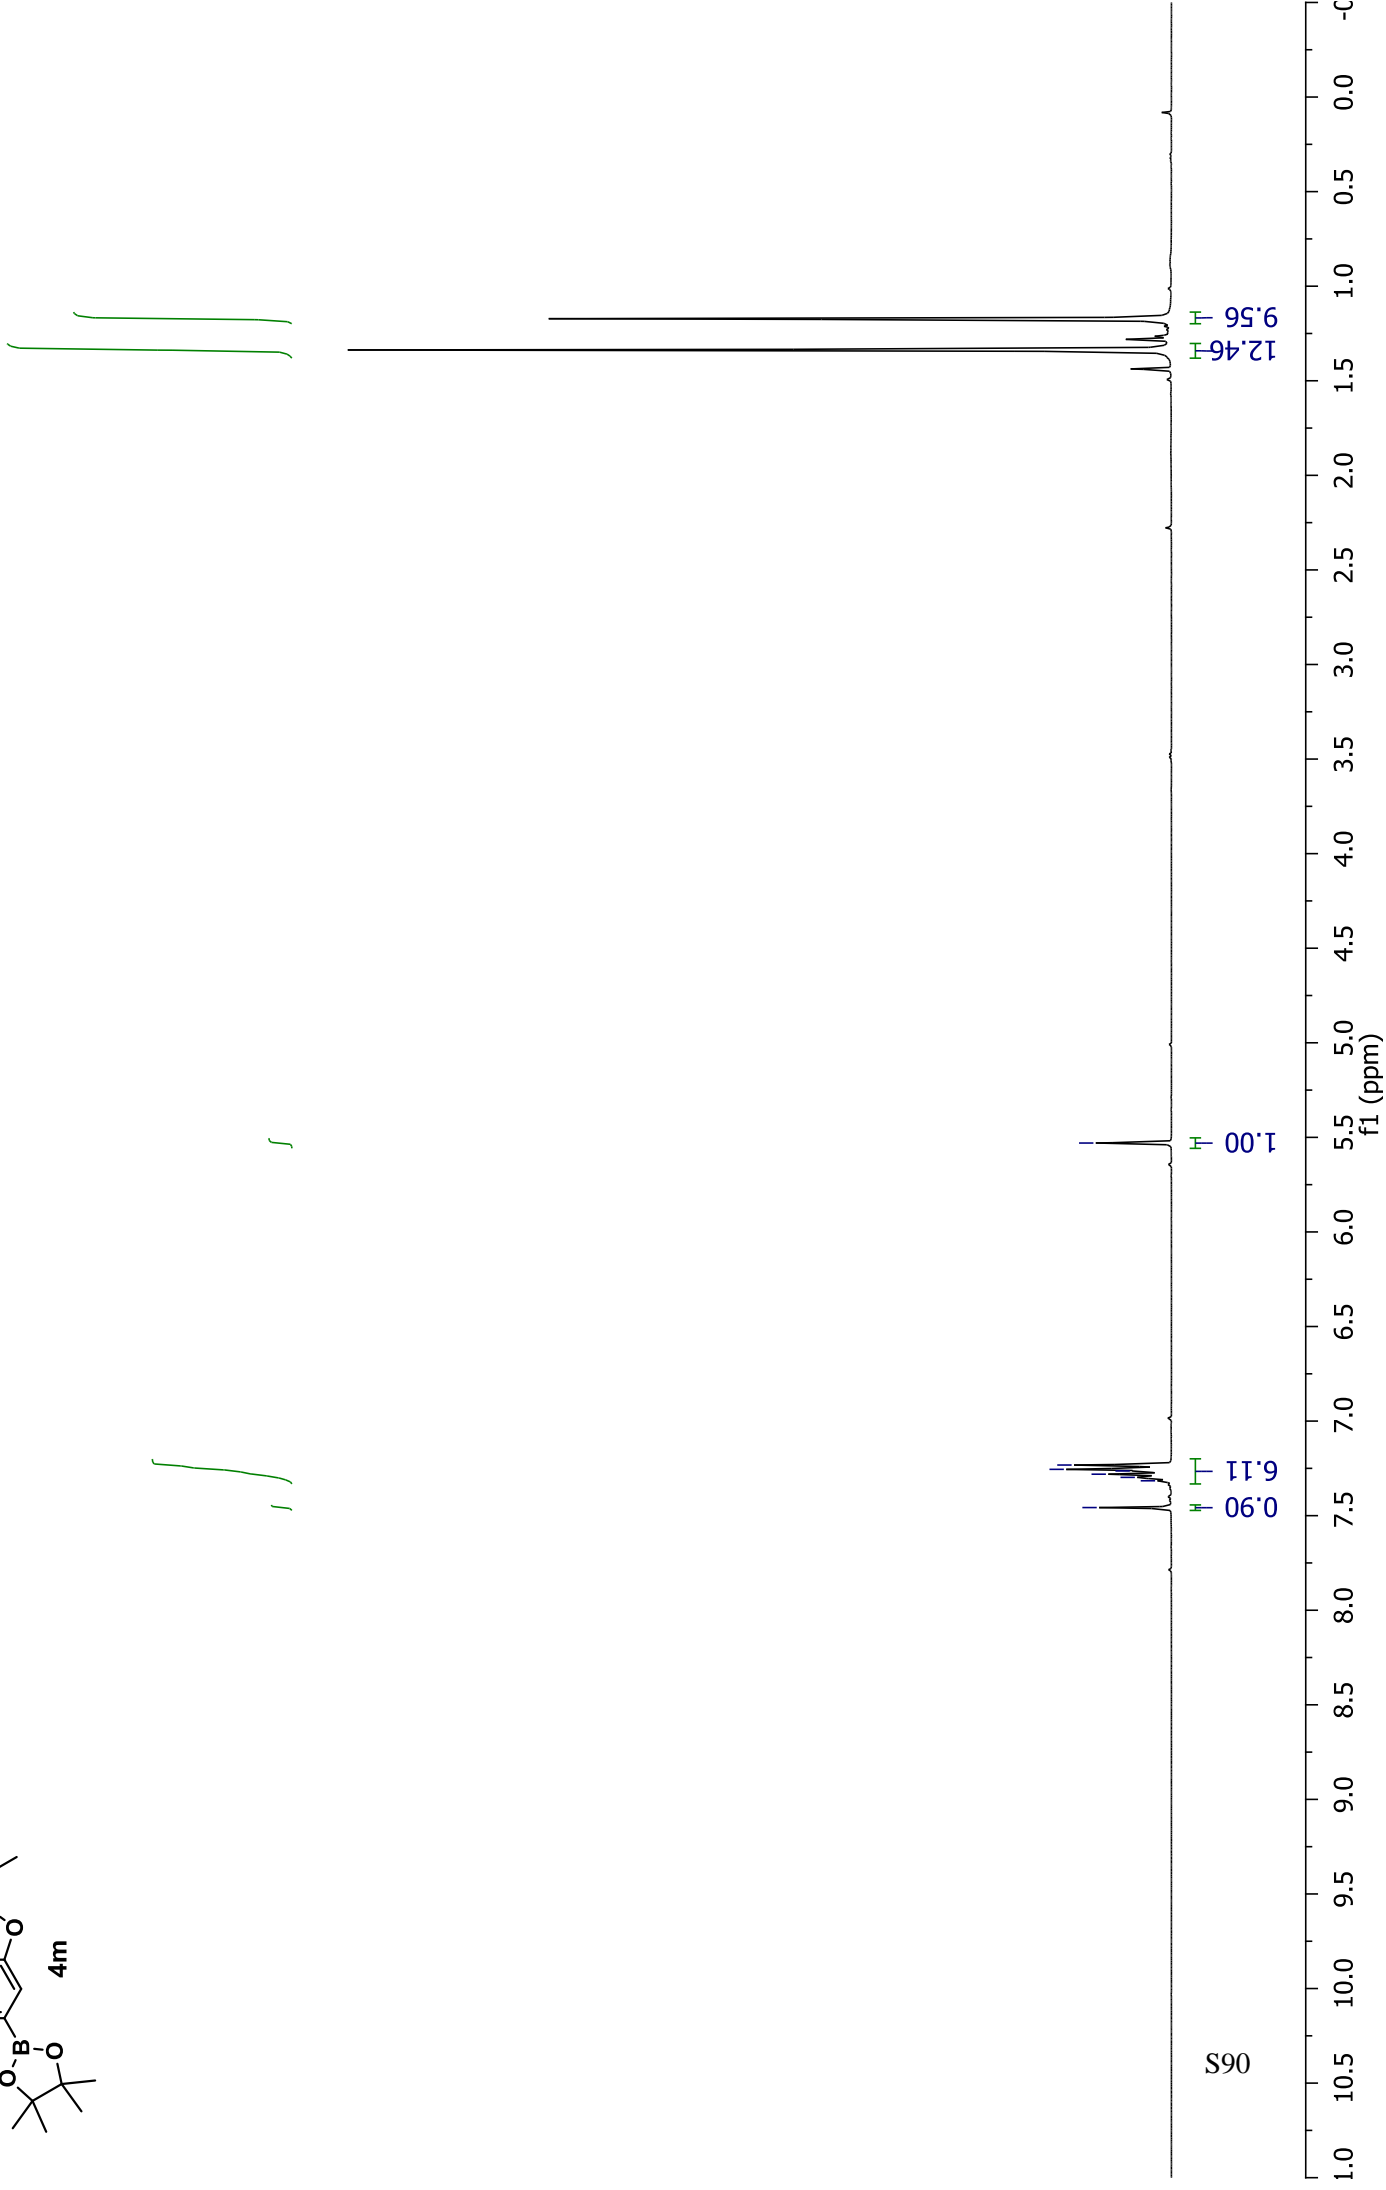

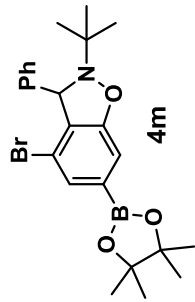

158.19  
141.32  
132.36  
130.64  
128.49  
128.15  
127.62  
117.74  
111.36  
84.20  
67.79  
61.69  
25.33  
24.87  
24.82

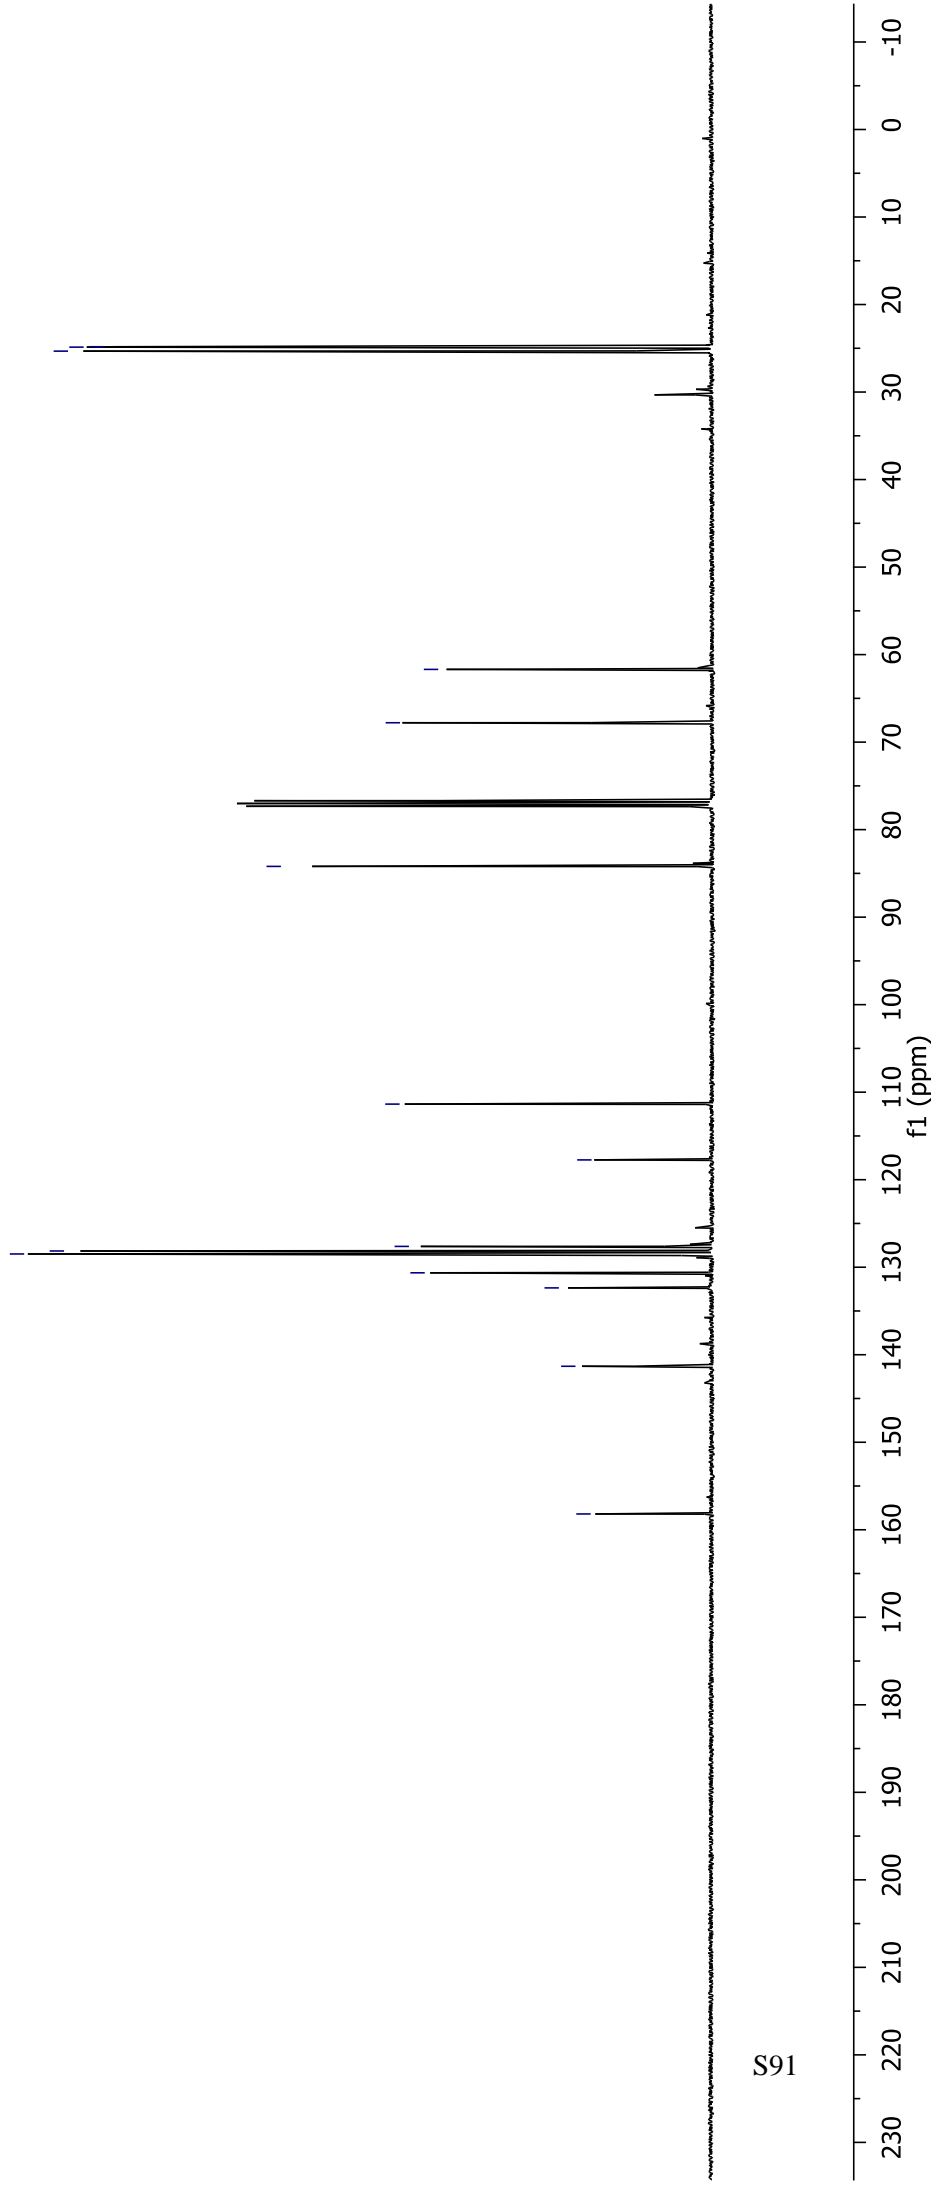

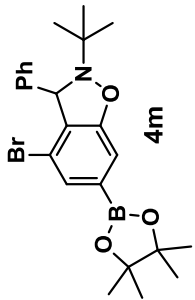

— 30.12

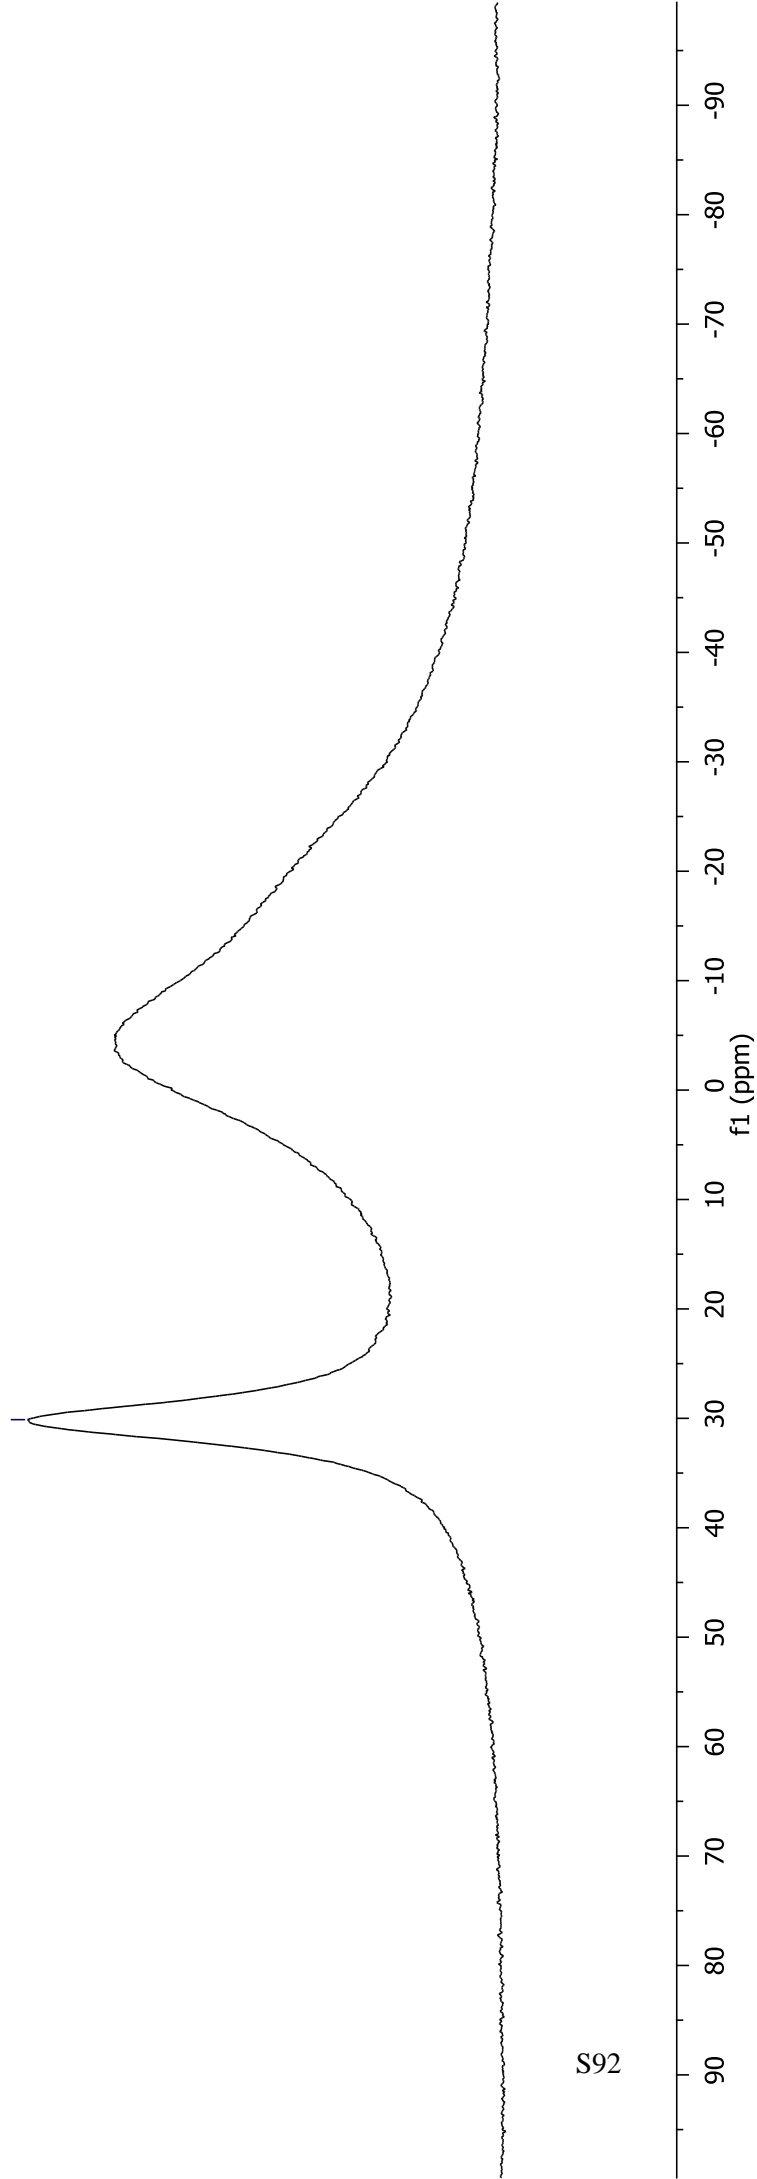

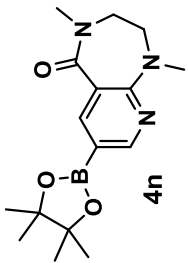

4n

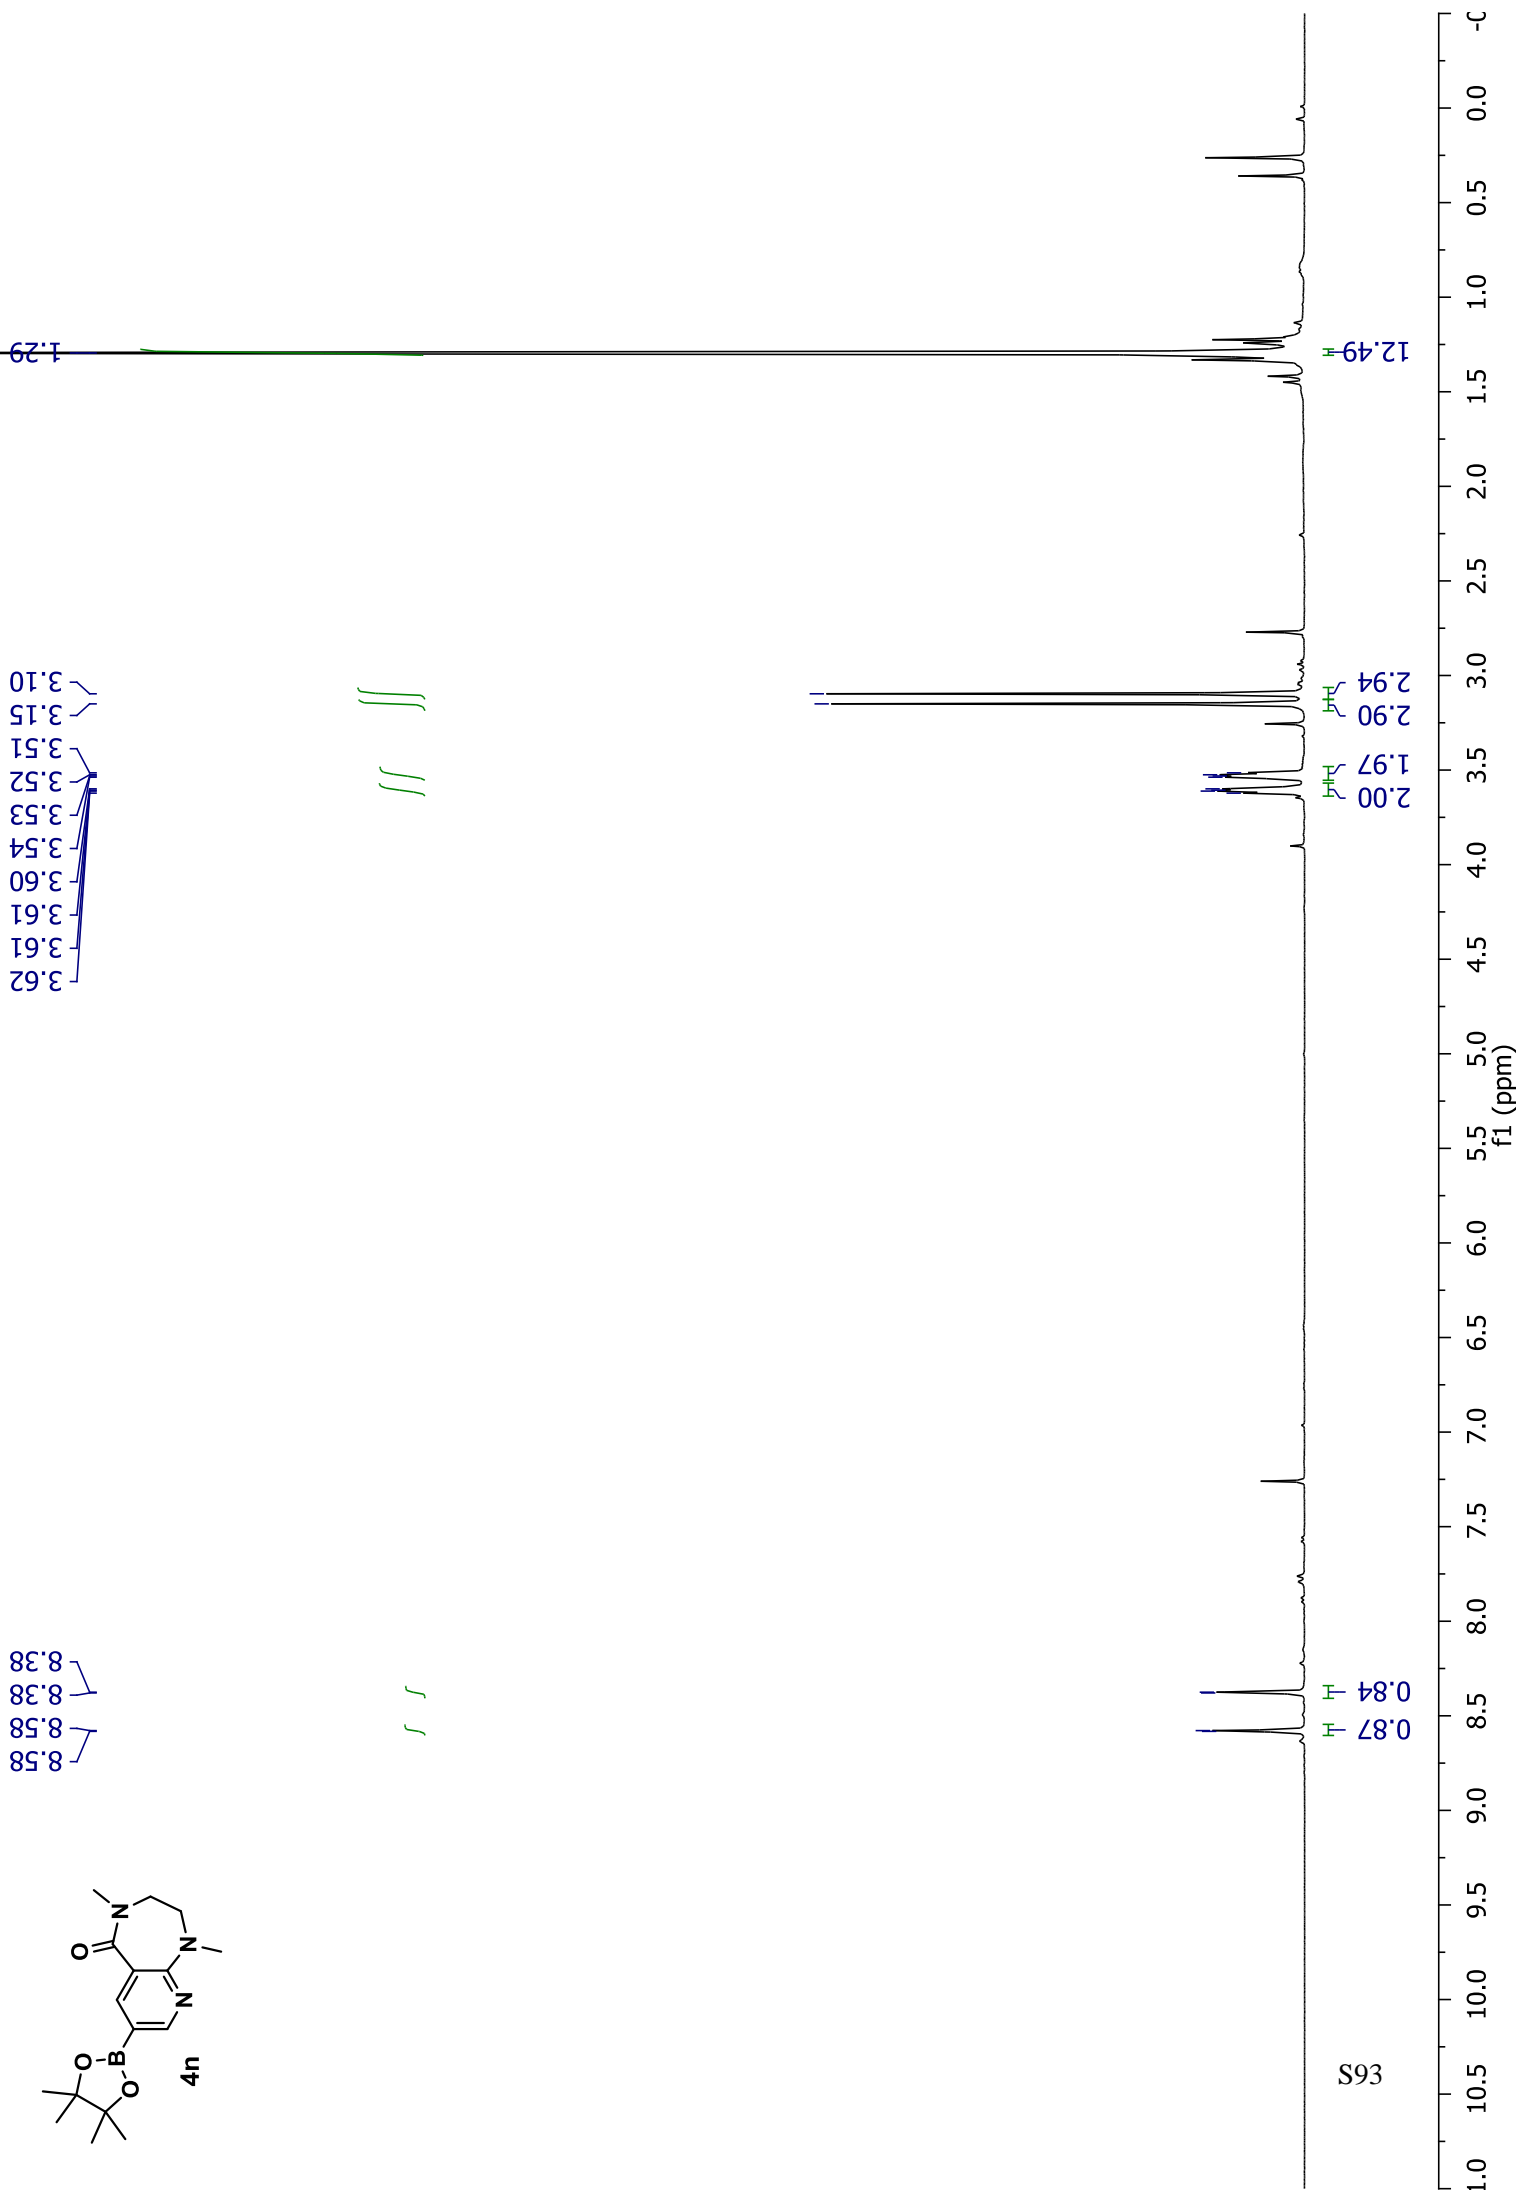

693

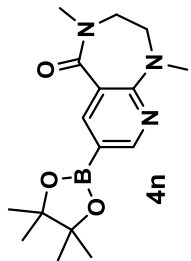

— 169.06  
— 156.99  
— 156.56  
— 147.30  
— 117.47  
— 83.59  
— 55.81  
— 47.75  
— 38.79  
— 35.54  
— 24.79

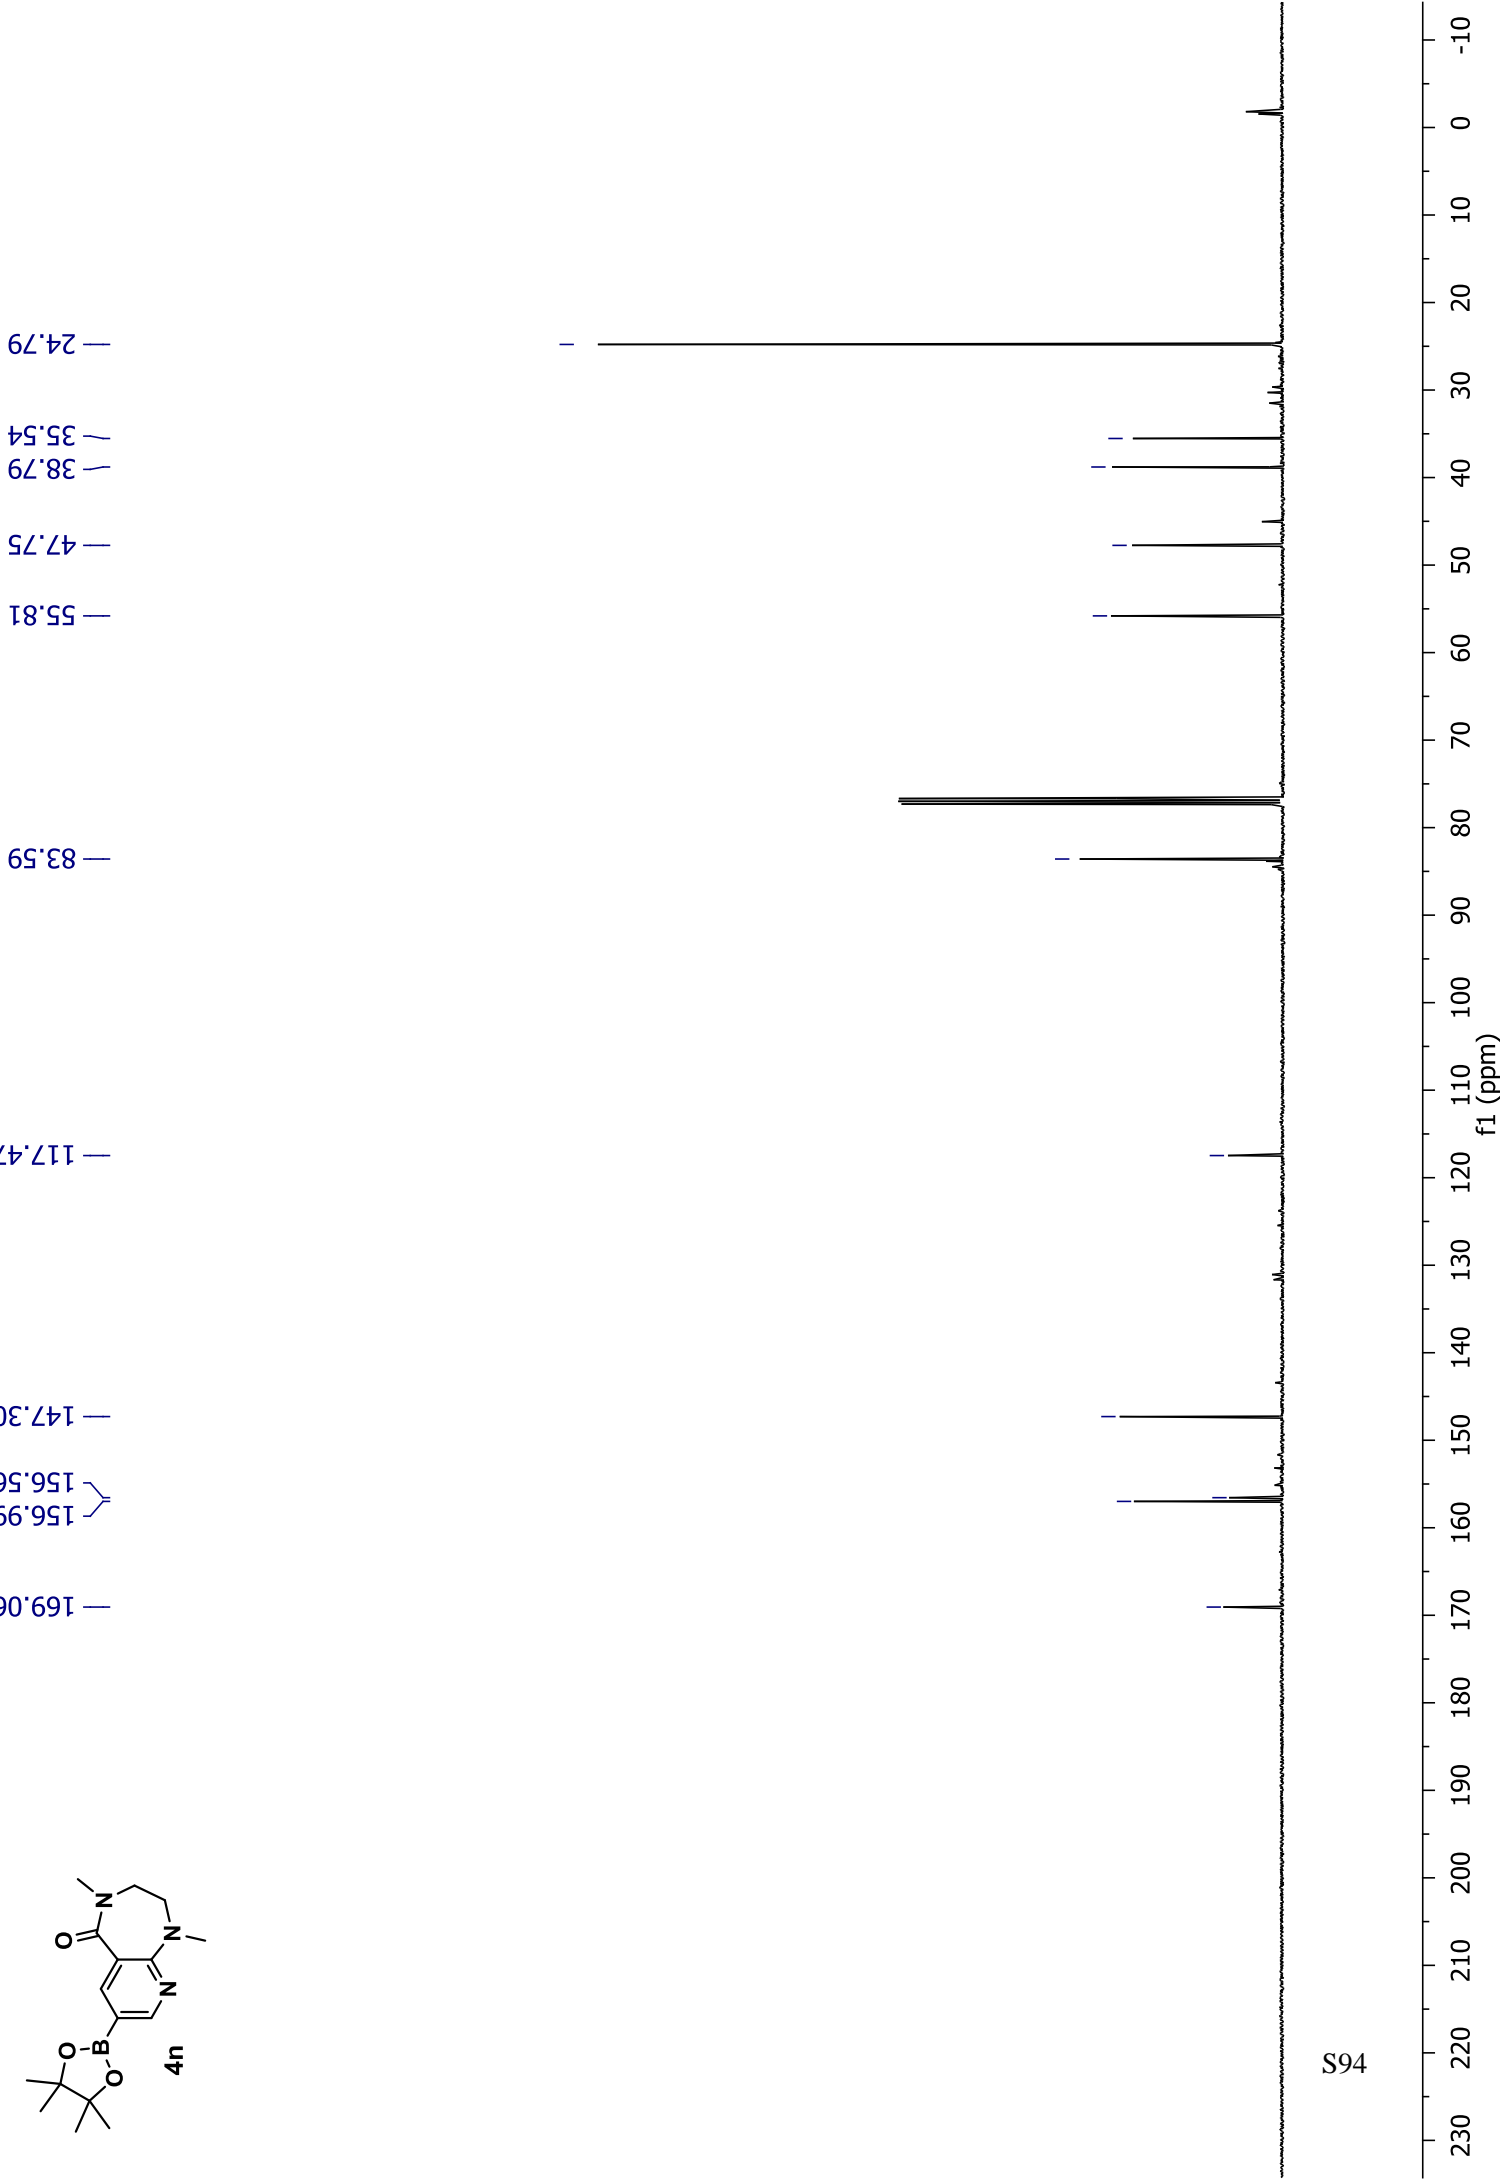

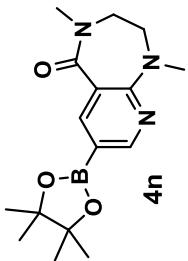

— 30.67

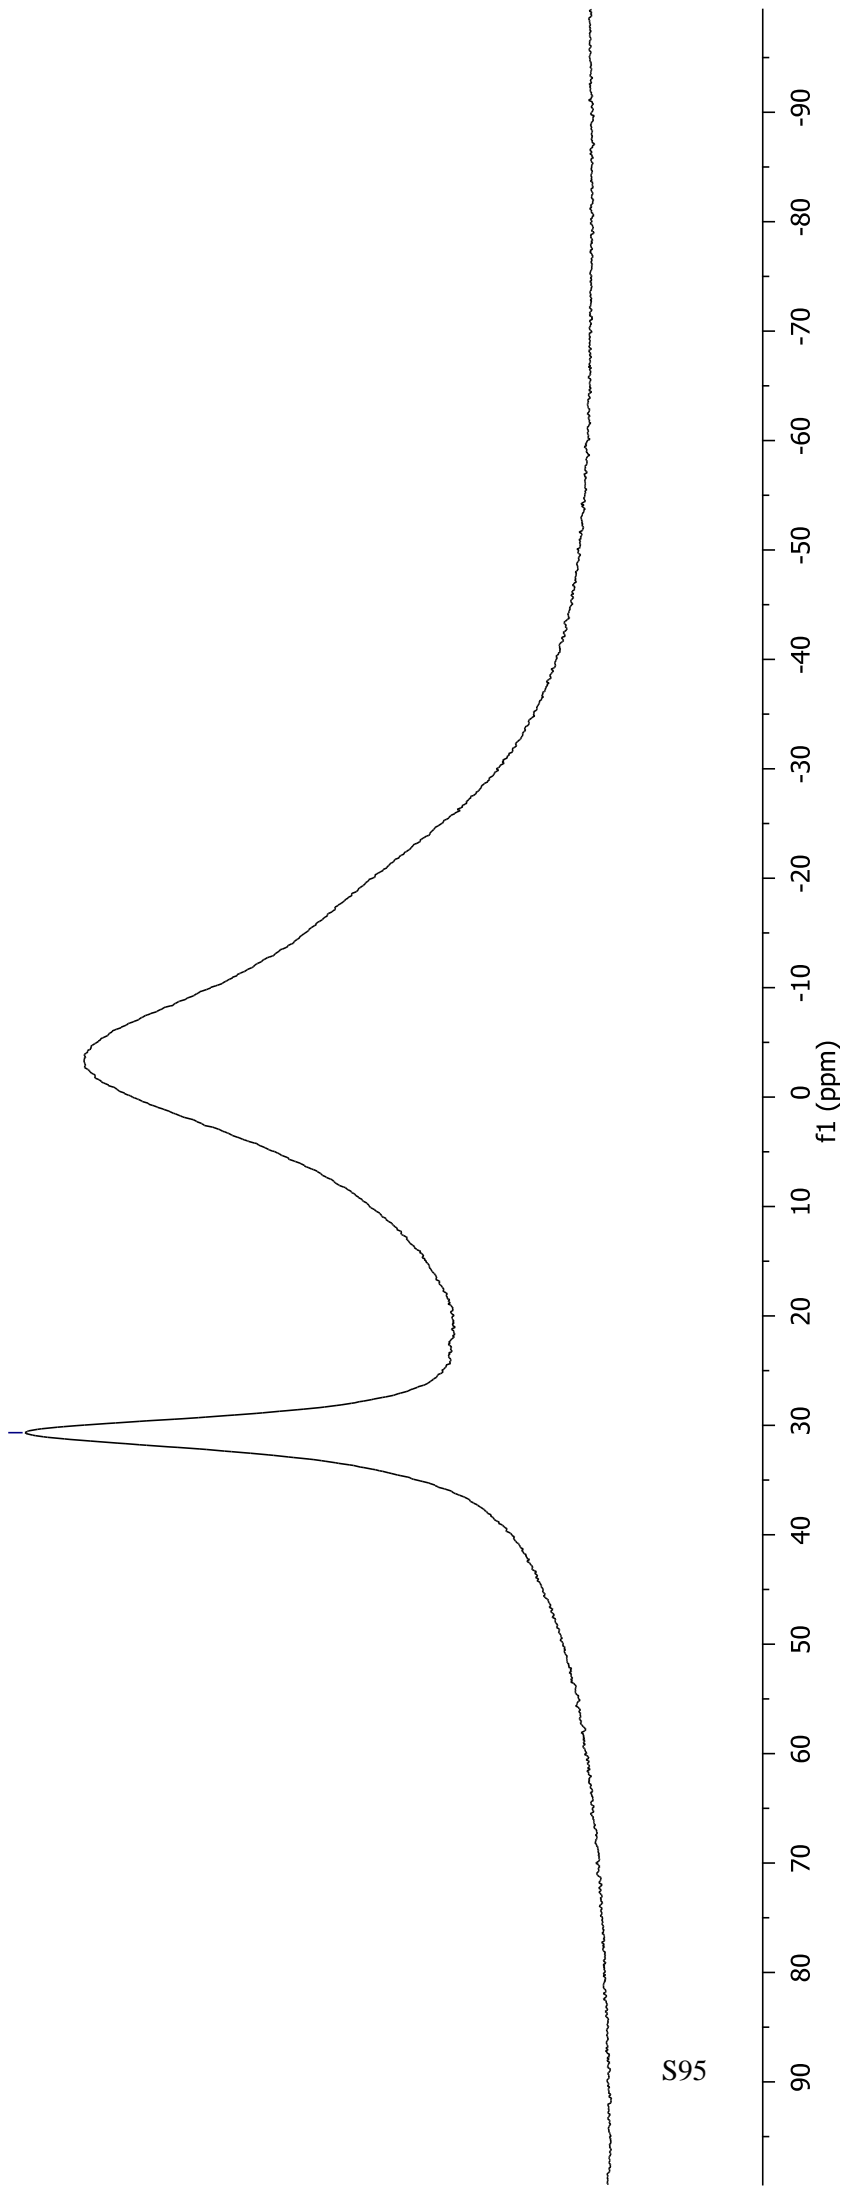

S95



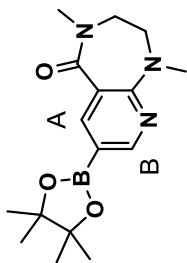

4n

Hydrogen A

Hydrogen B

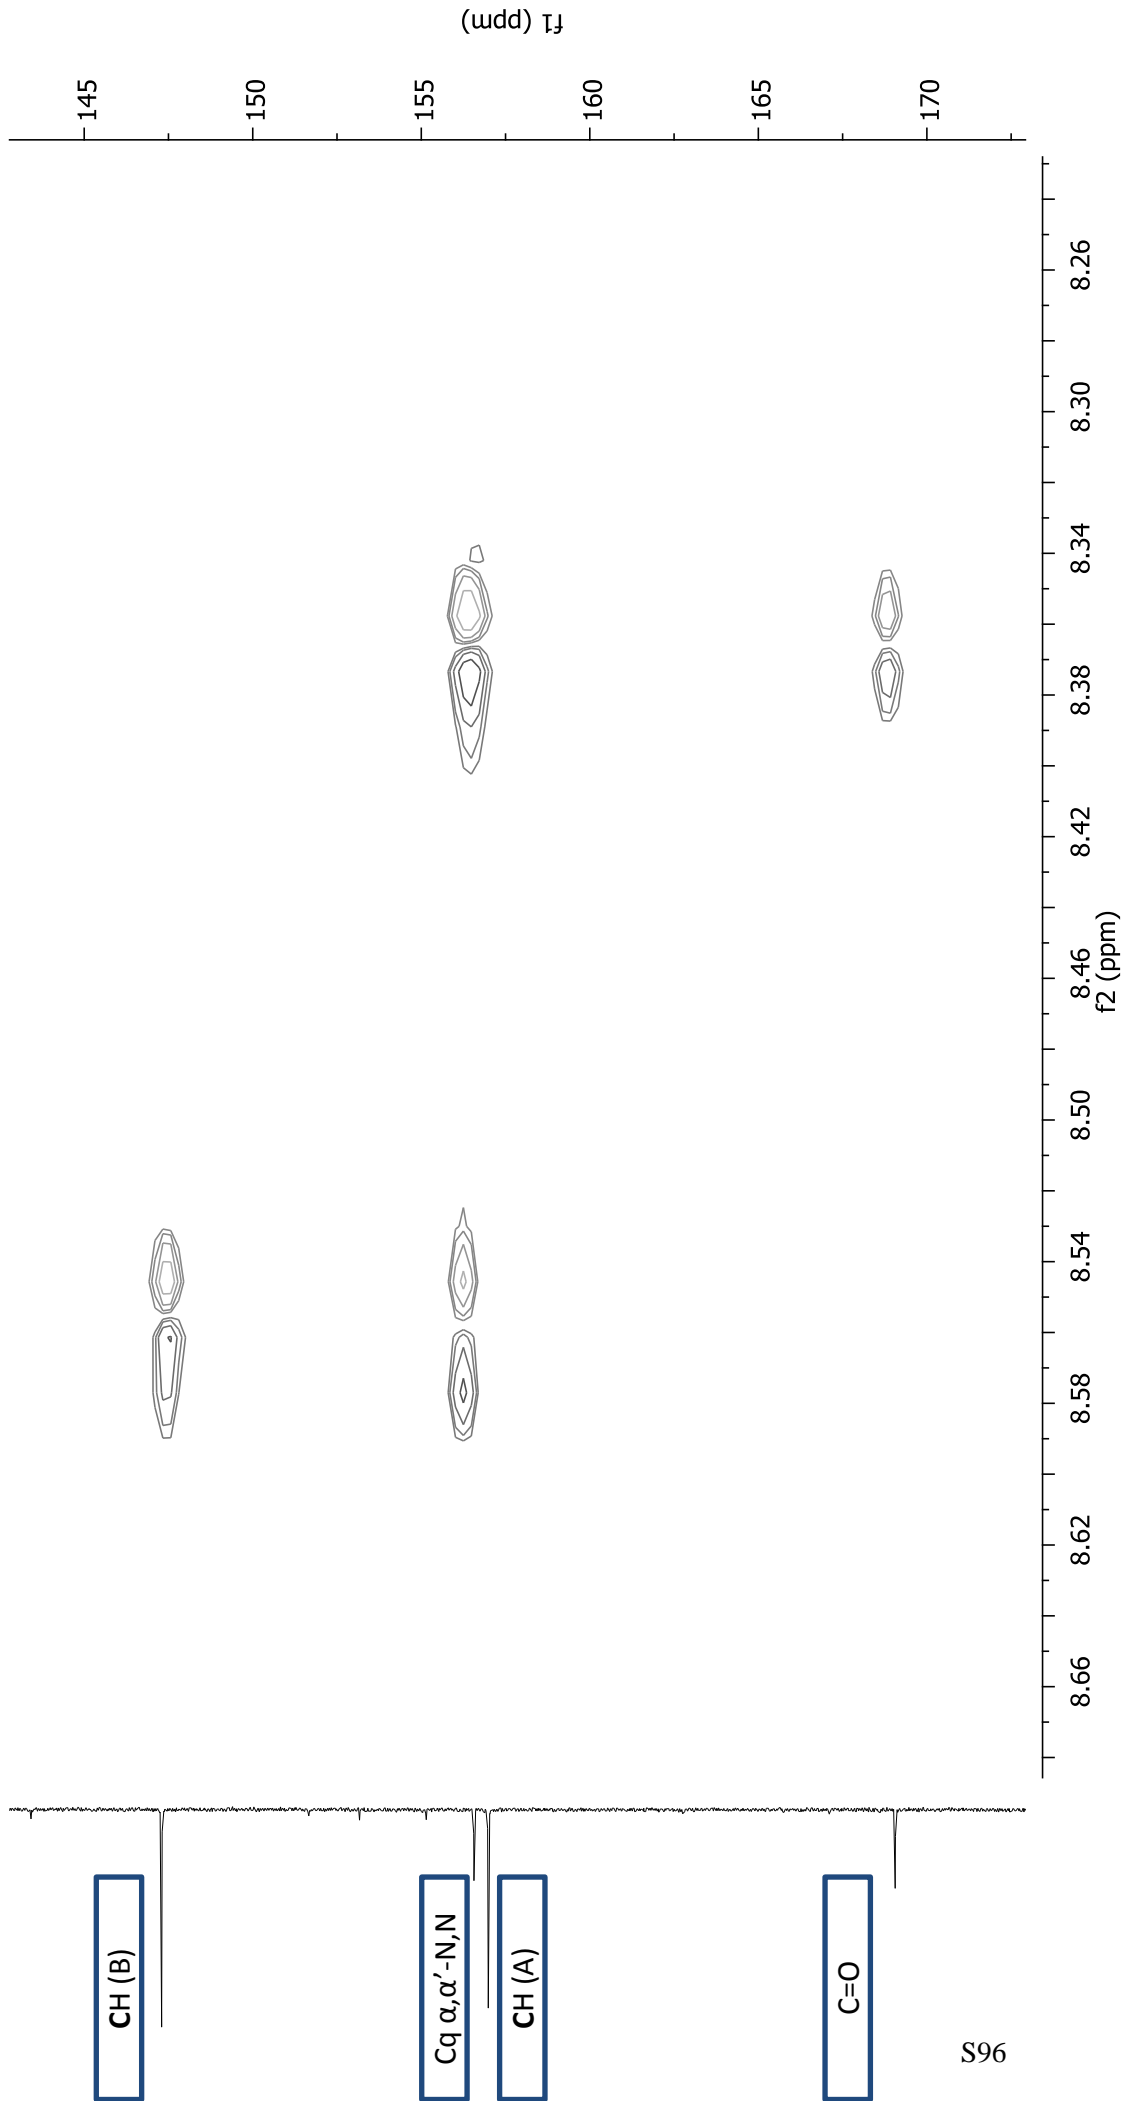

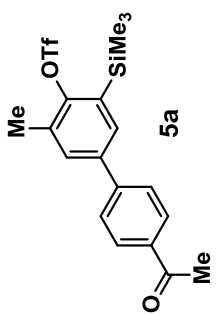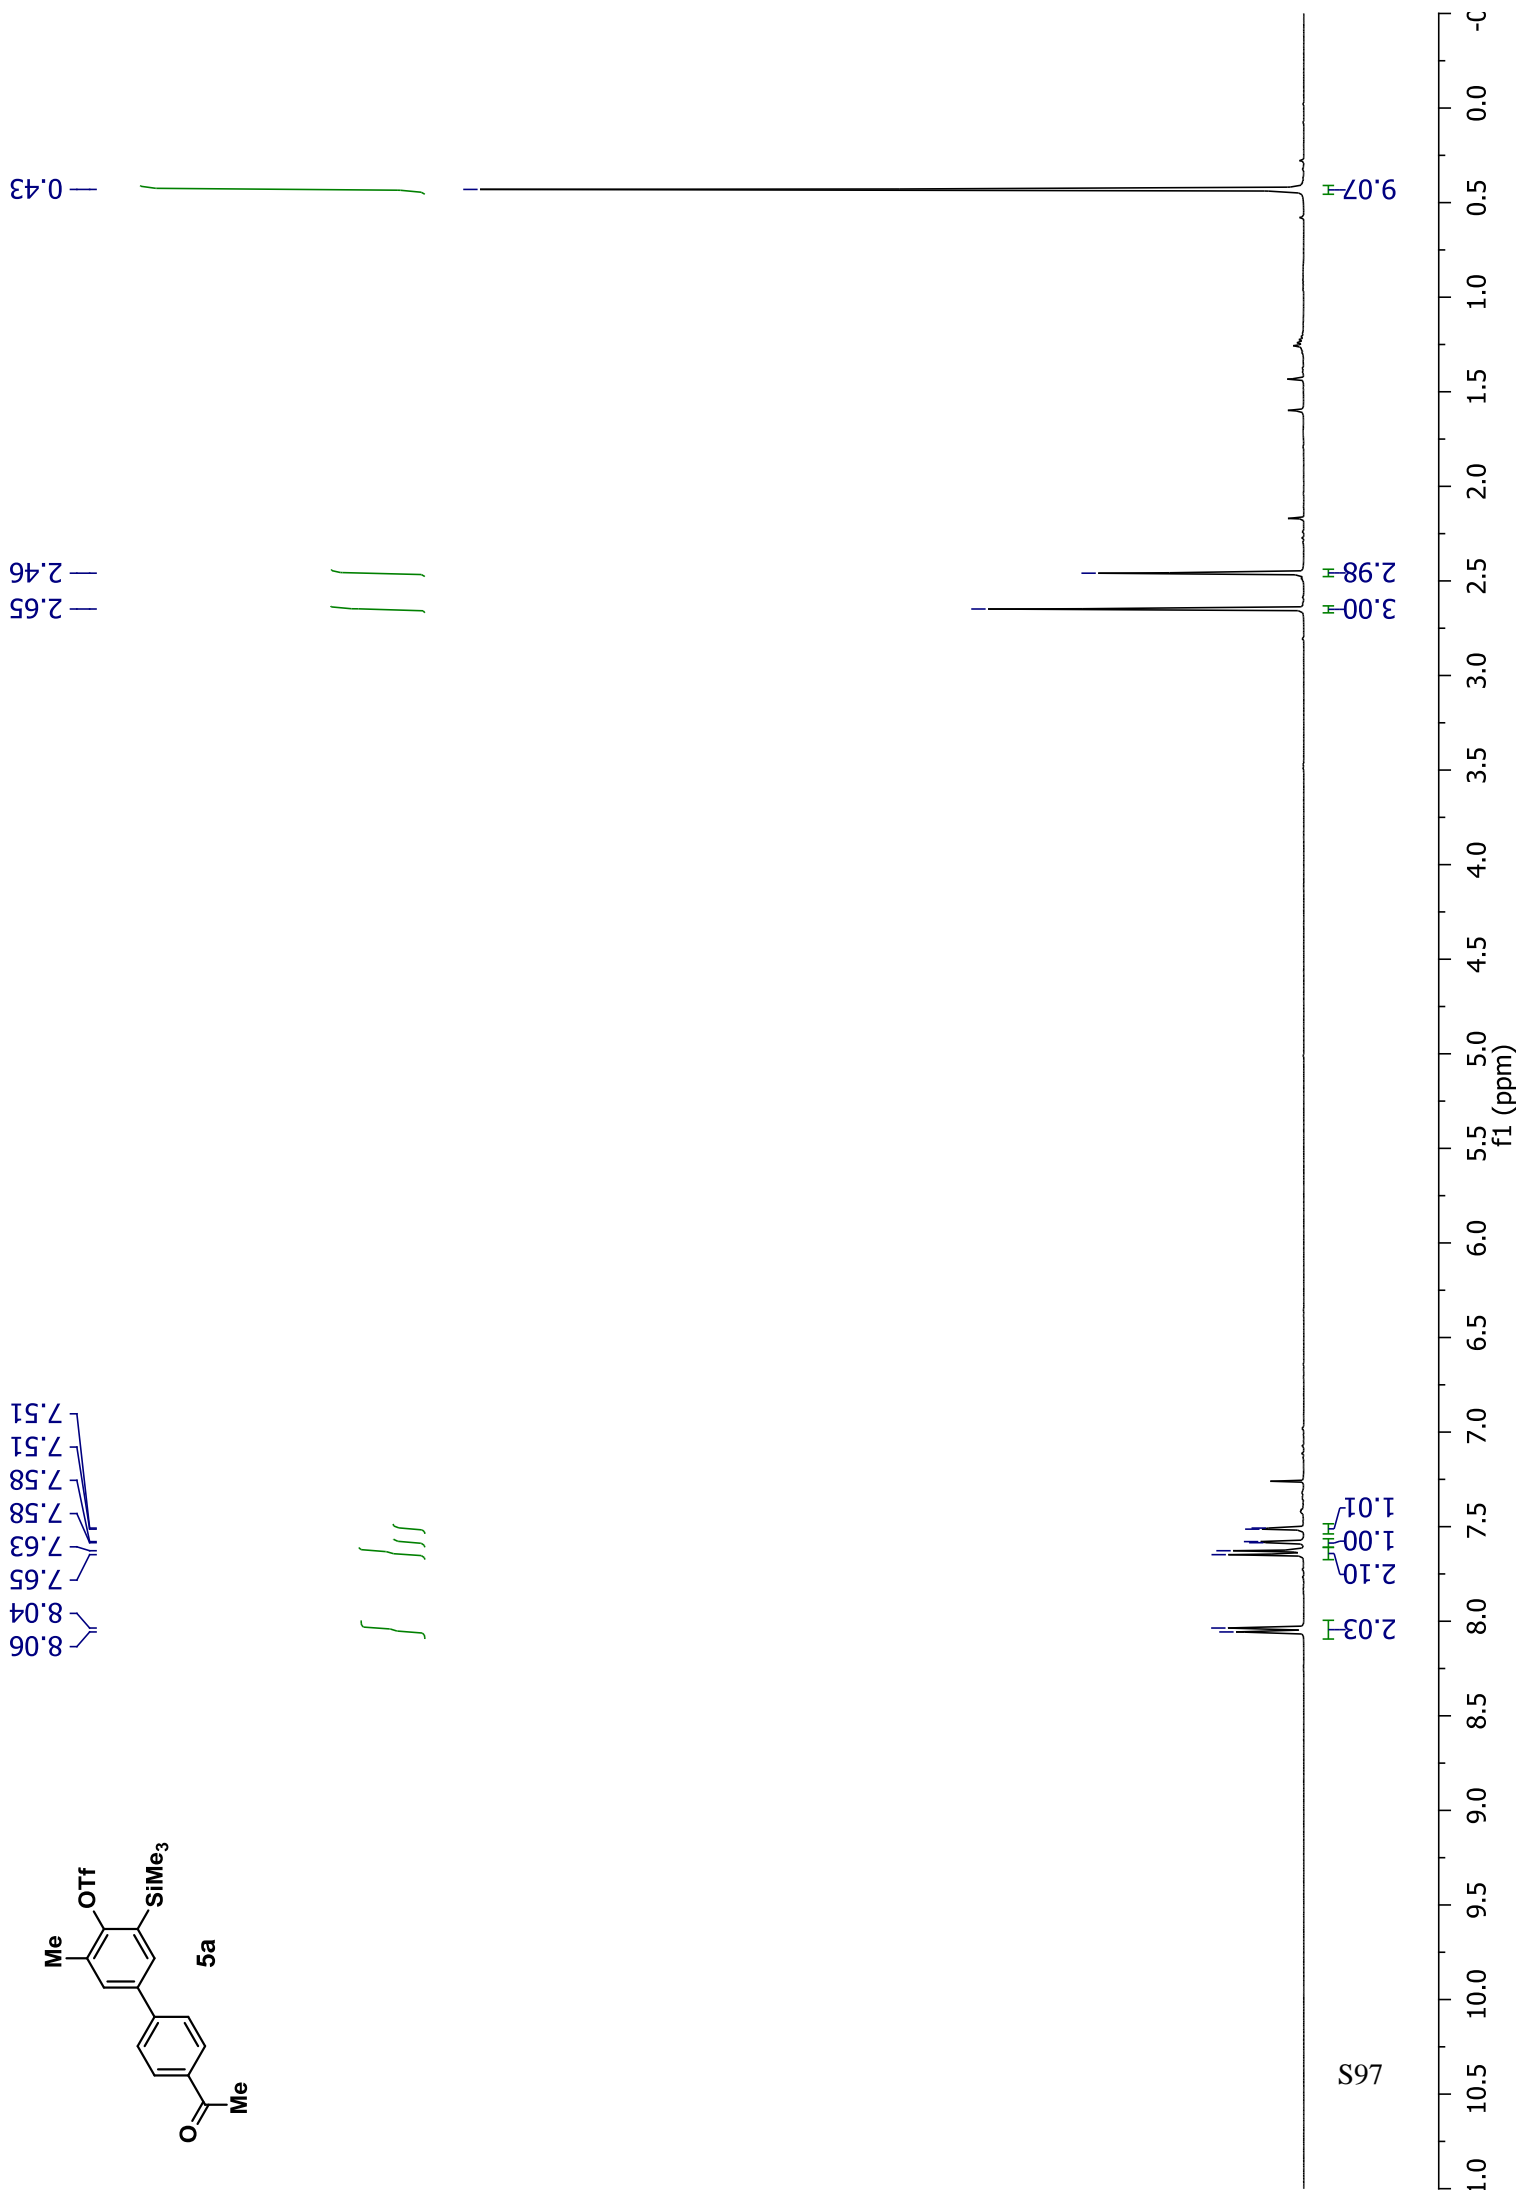

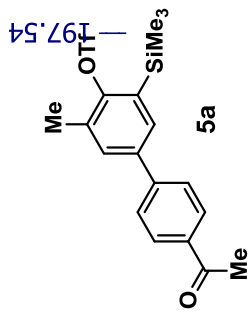

197.54

151.03  
144.27  
139.60  
136.26  
135.62  
133.26  
132.48  
131.94  
128.94  
127.38  
123.37  
120.19  
117.01  
113.83

26.65  
17.47  
17.46

0.08

868

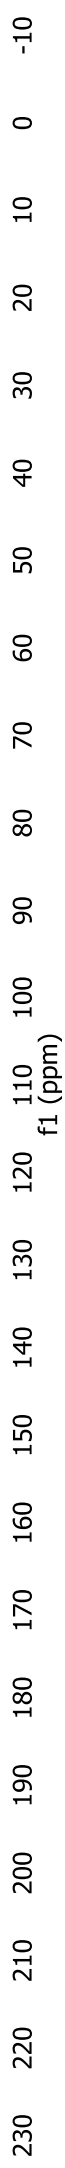

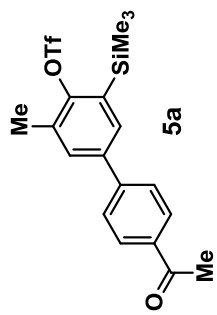

— -73.26

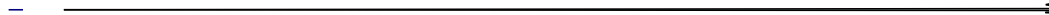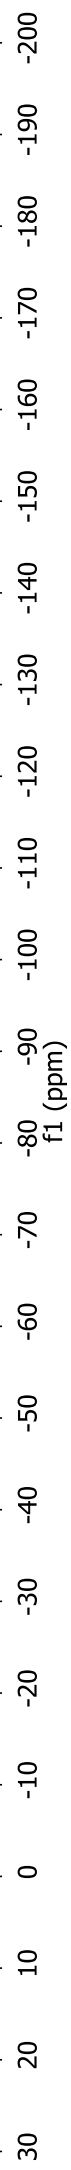



ed234-01\_purif\_CARBON\_01

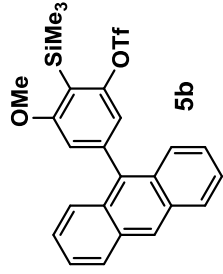

165.38  
154.56  
143.02  
134.55  
131.22  
129.83  
128.43  
127.35  
126.13  
125.93  
125.27  
123.37  
120.17  
120.08  
116.98  
115.88  
115.86  
113.79  
112.63  
55.75  
0.90

f1 (ppm)

101

ed234-01\_purif\_FLUORINE\_01

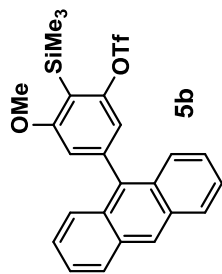

-72.65

30 20 10 0 10 20 30 40 50 60 70 80 90 100 110 120 130 140 150 160 170 180 190 200

f1 (ppm)

S102

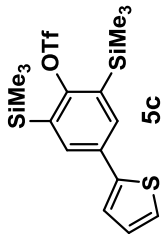

0.41

7.75  
7.35  
7.33  
7.31  
7.30  
7.13  
7.12  
7.11  
7.10

1.93  
1.00  
1.00

18.30

1.93  
0.96  
1.00  
1.00

S103

f1 (ppm)



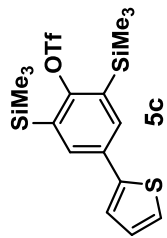

154.11  
142.67  
135.63  
135.61  
133.43  
128.18  
125.74  
124.08  
123.18  
120.00  
116.82  
113.64

0.30

f1 (ppm)

S104

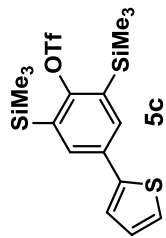

-72.35

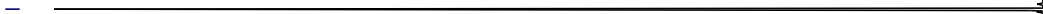

S105

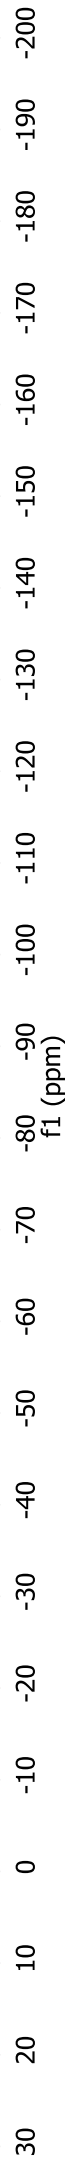

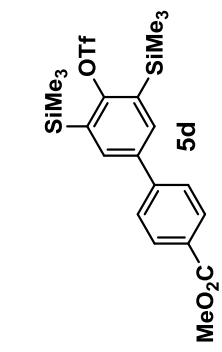

8.15  
8.13  
7.75  
7.62  
7.60

3.96

0.42

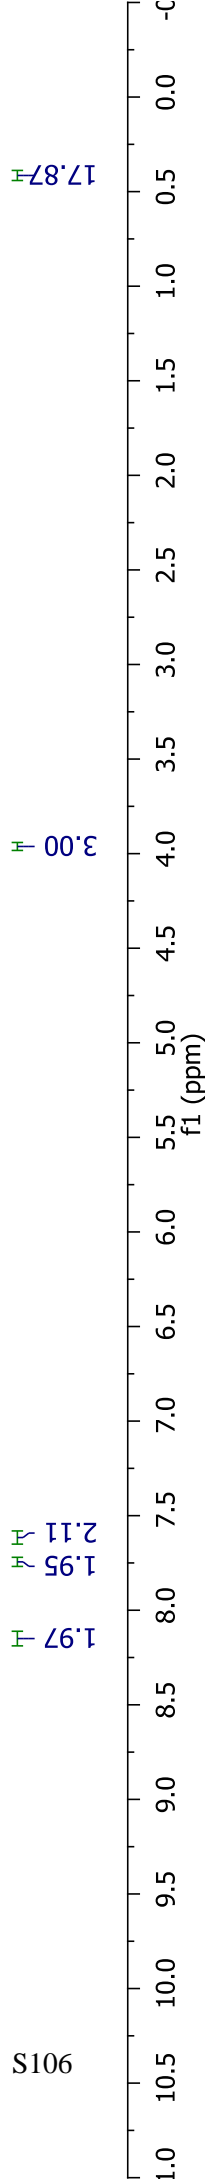

901S

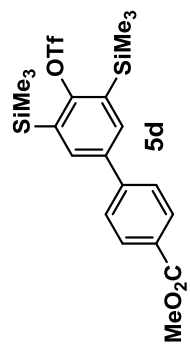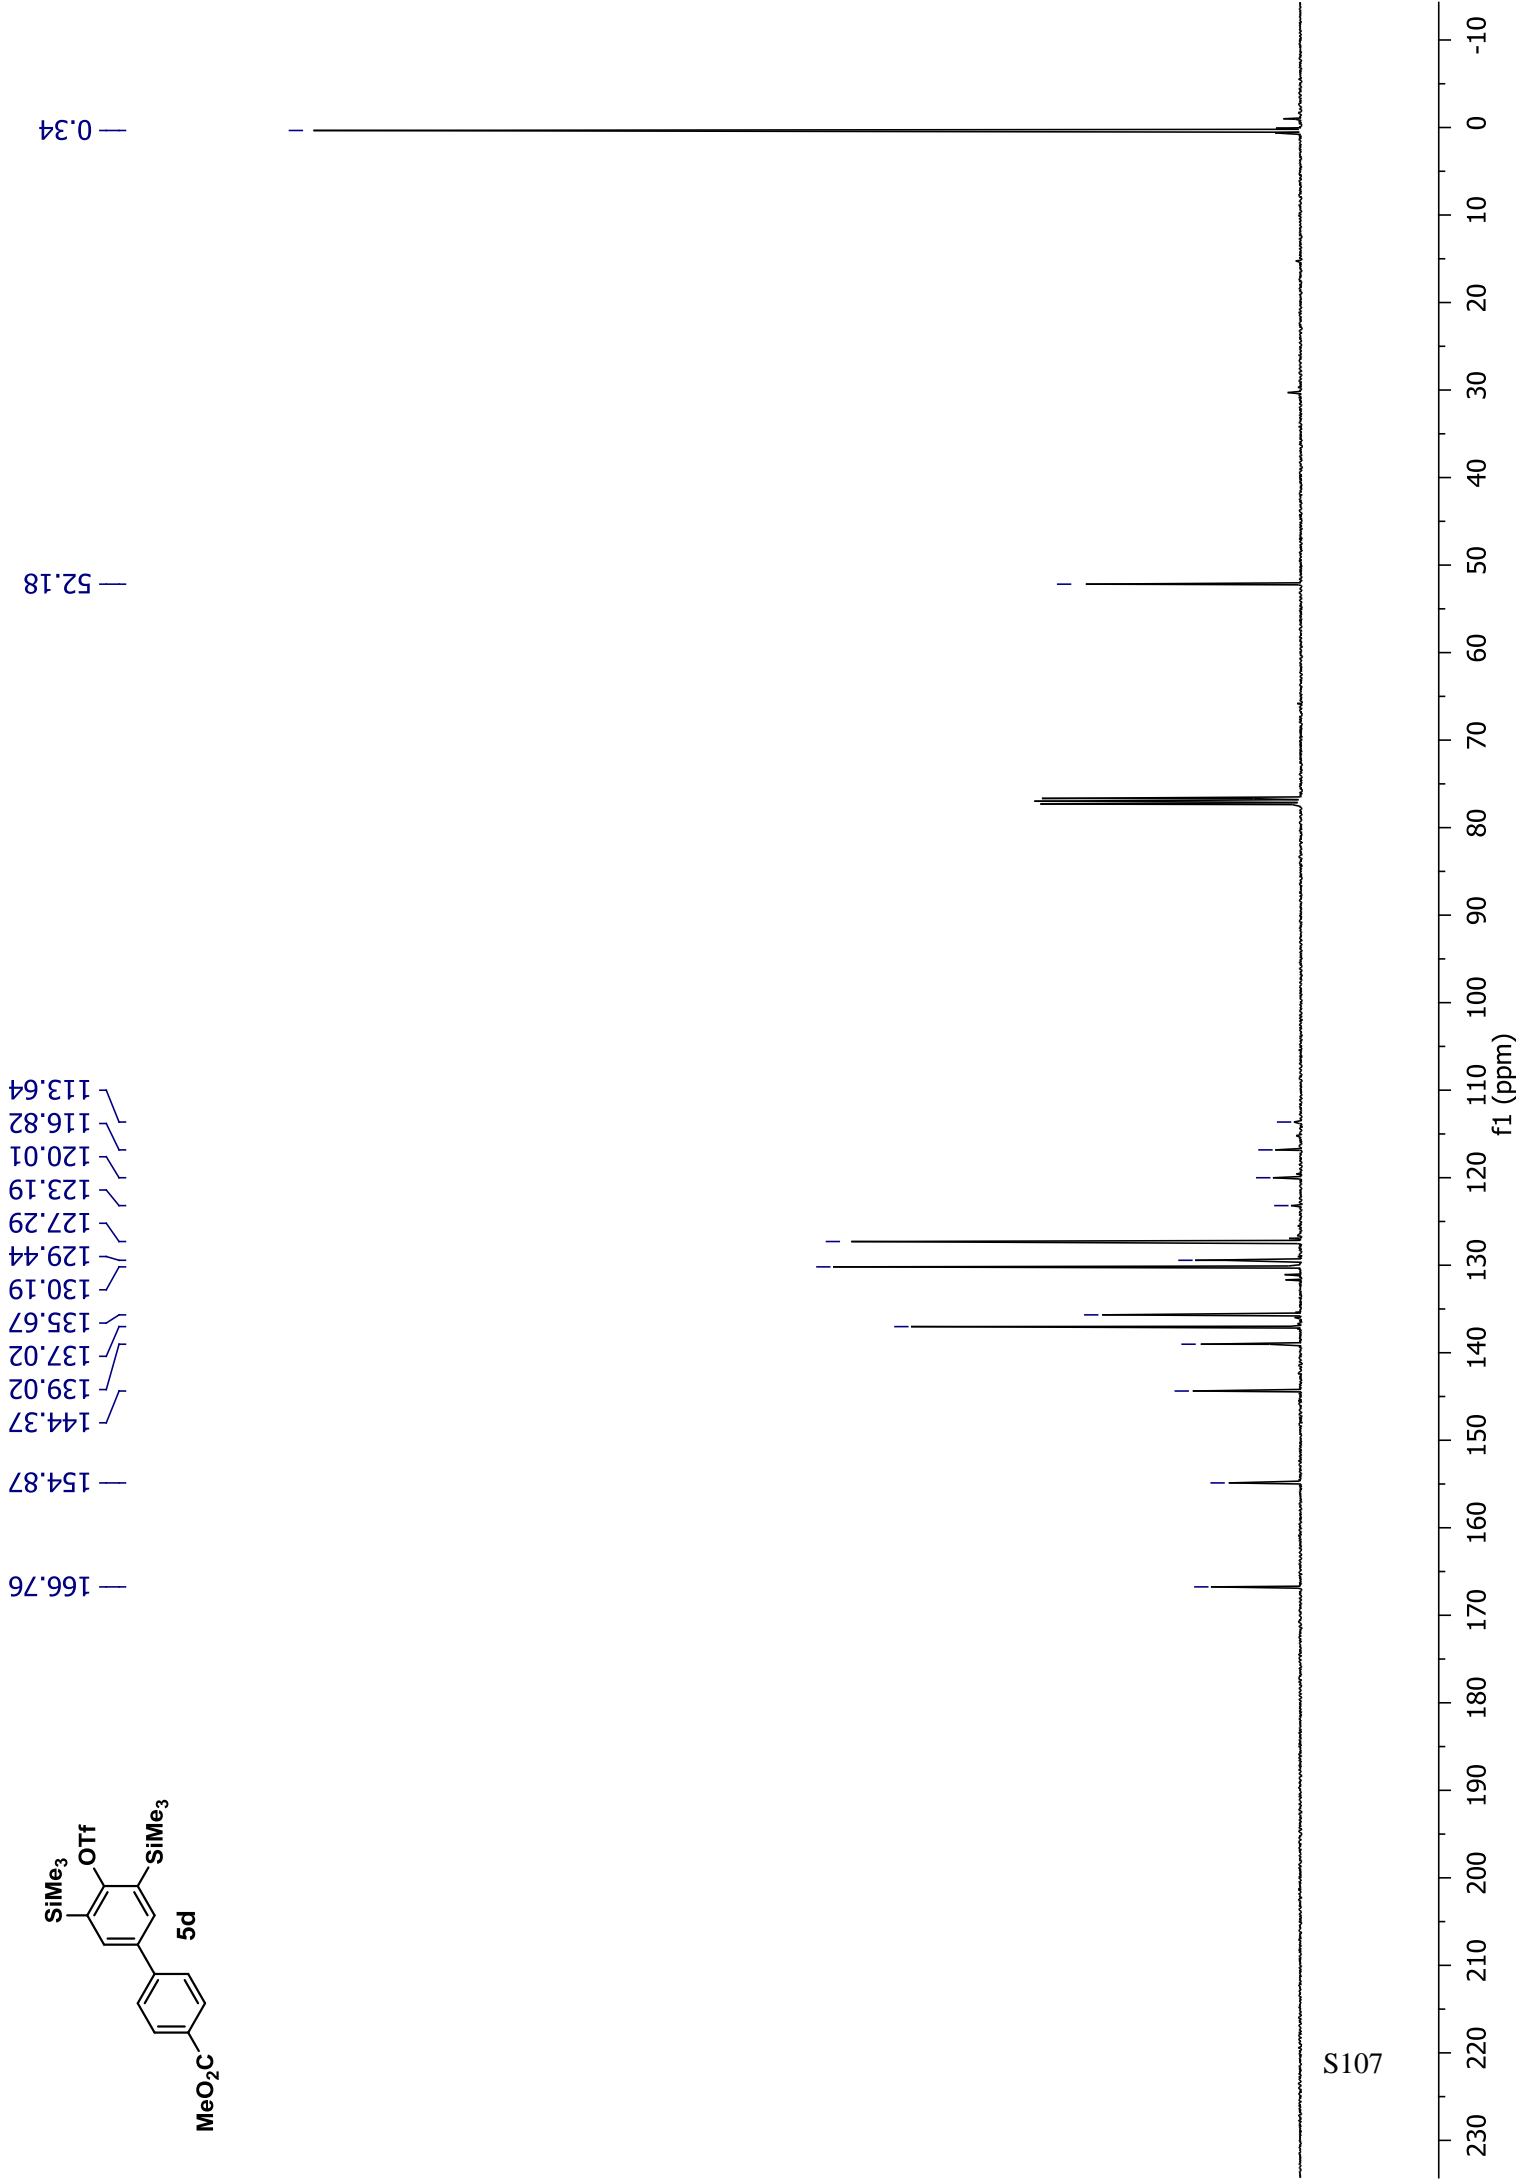

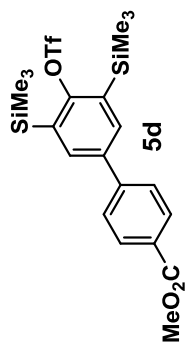

-72.31

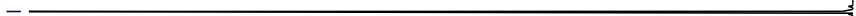

S108



ed235-01\_F1\_PROTON\_01

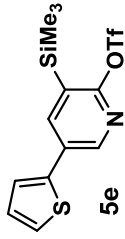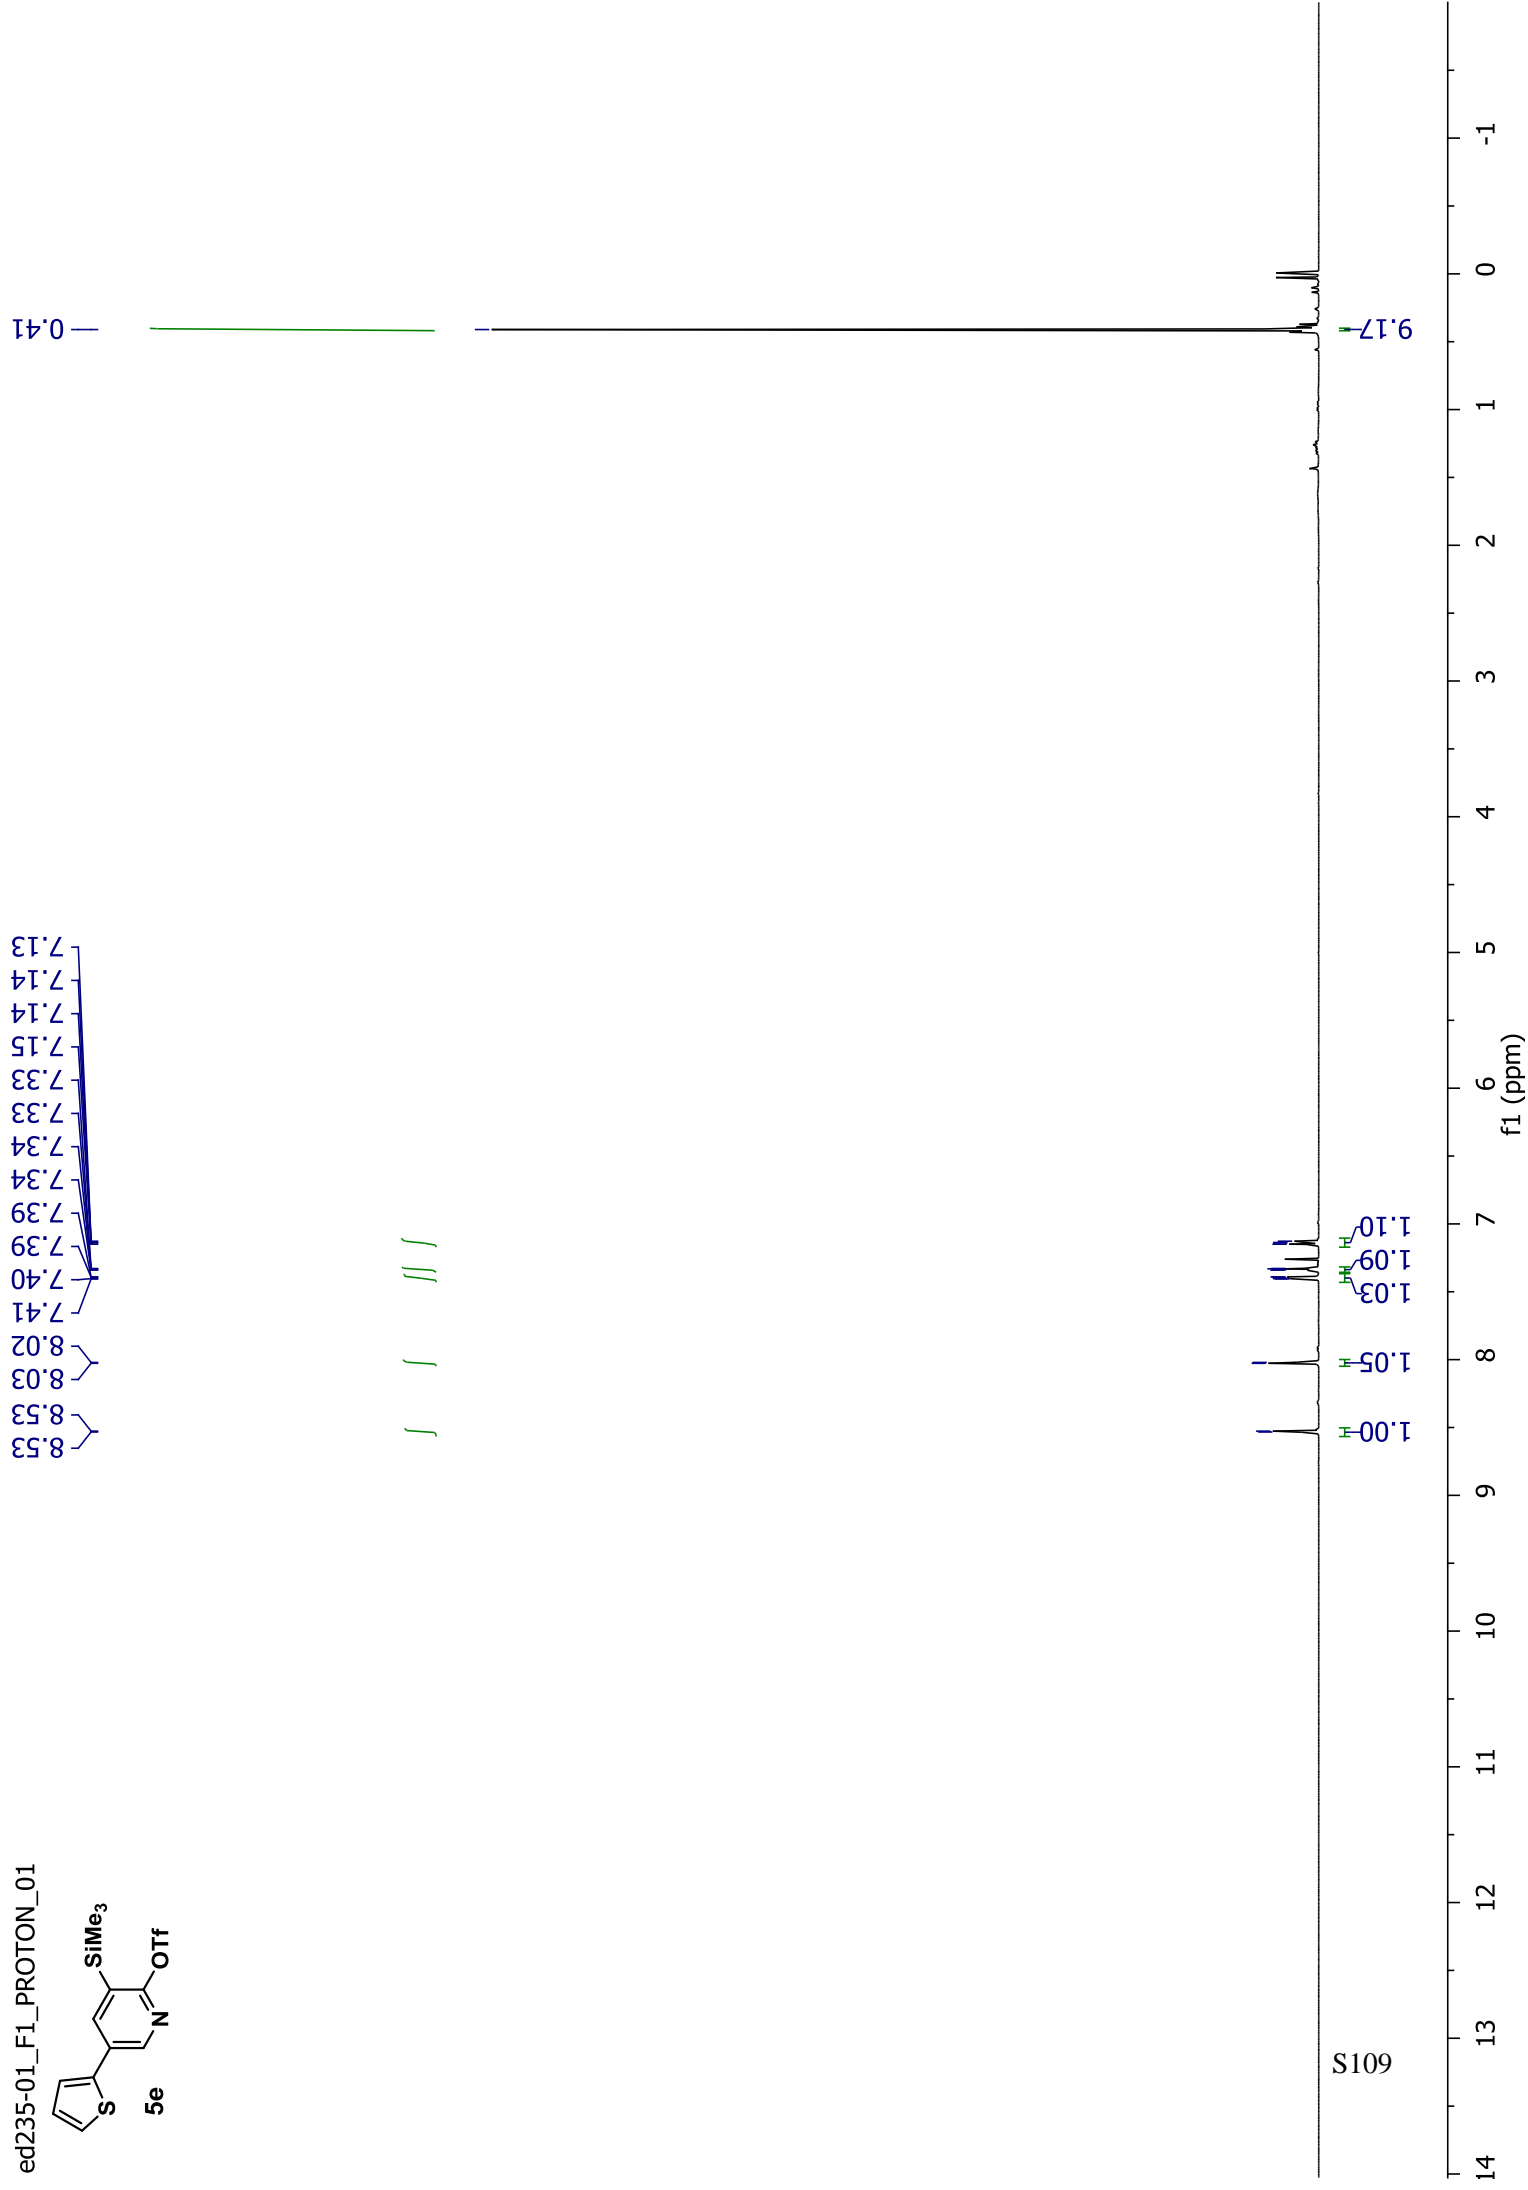

ed235-01\_ana\_CARBON\_01

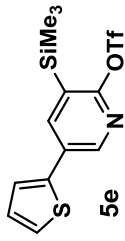

159.68  
145.47  
143.90  
138.65  
130.34  
128.43  
126.67  
125.45  
124.89  
123.27  
120.08  
116.89  
113.71

-1.62

110

f1 (ppm)

230 220 210 200 190 180 170 160 150 140 130 120 110 100 90 80 70 60 50 40 30 20 10 0 -10

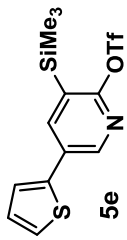

-72.73

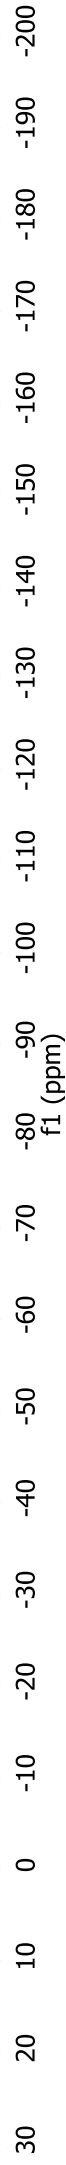



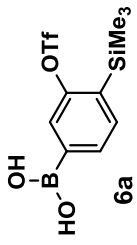

8.40  
8.27  
8.25  
8.12  
8.11  
8.09  
7.73  
7.71  
7.53  
7.51

0.46  
0.44

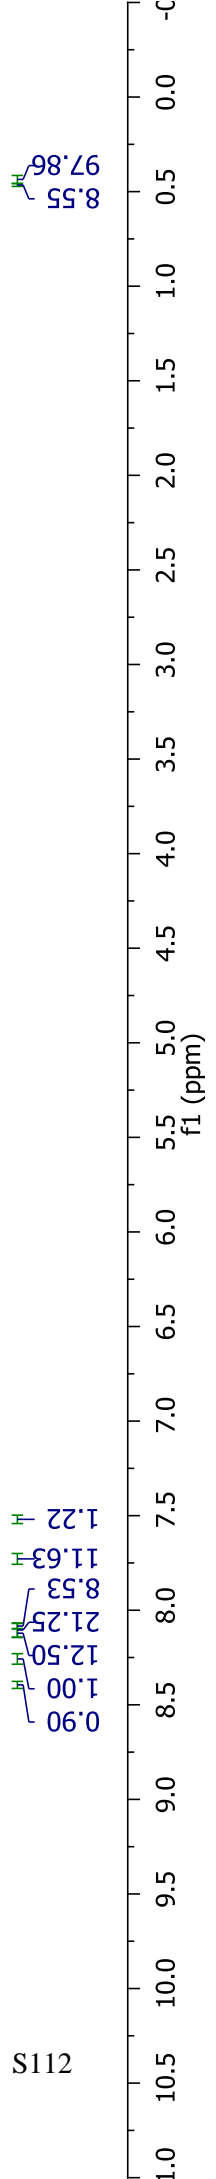

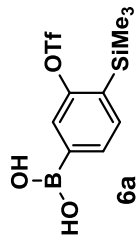

155.29  
138.63  
136.27  
134.06  
125.62  
123.31  
120.13  
116.95  
113.77

-0.92

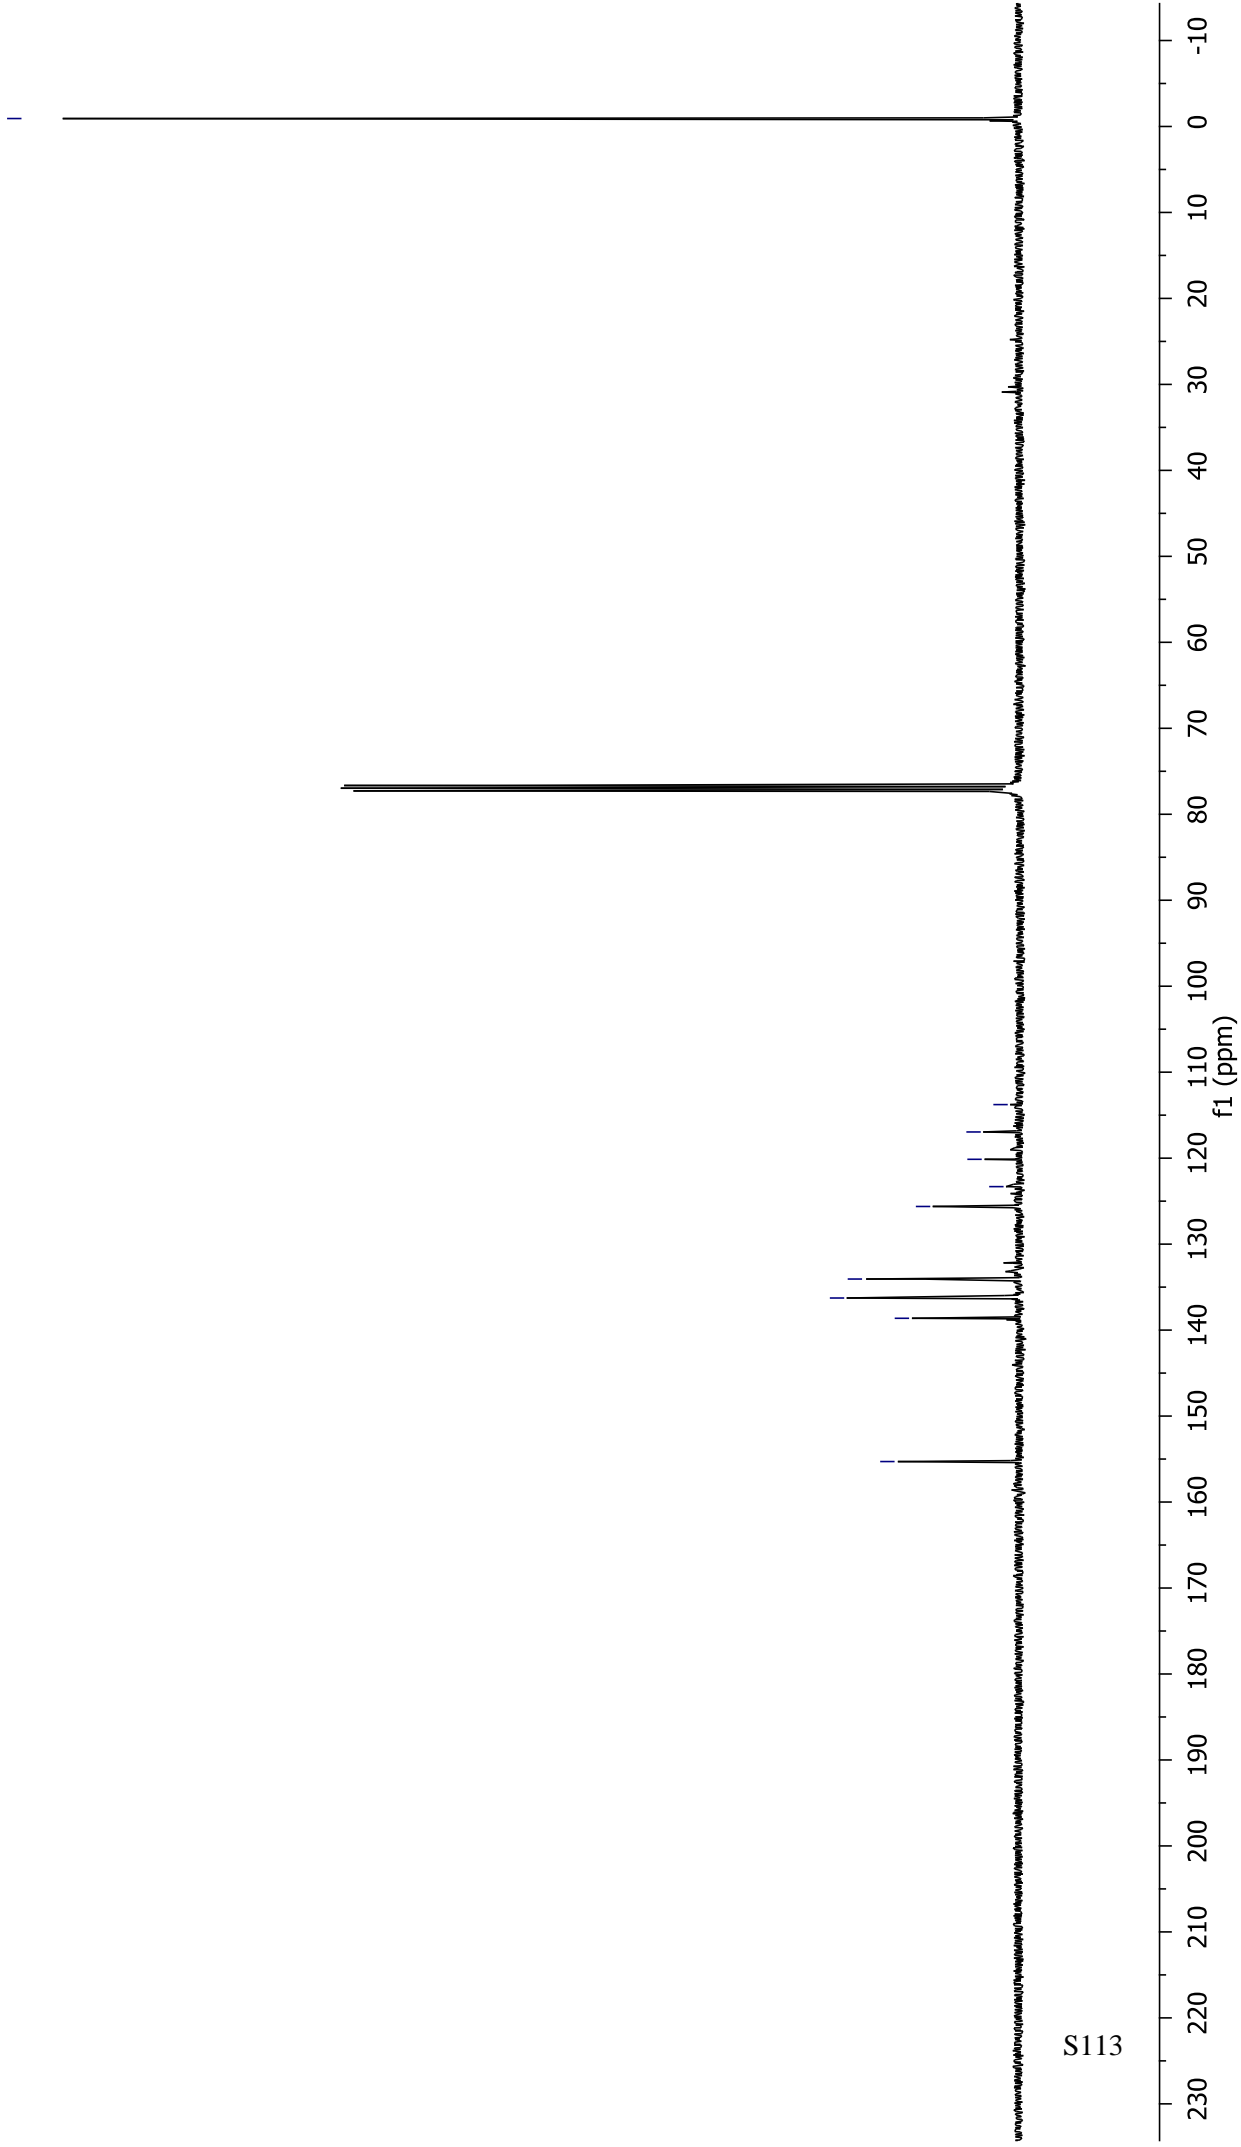

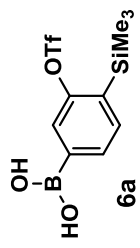

— -74.06

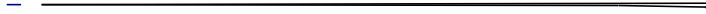

S114

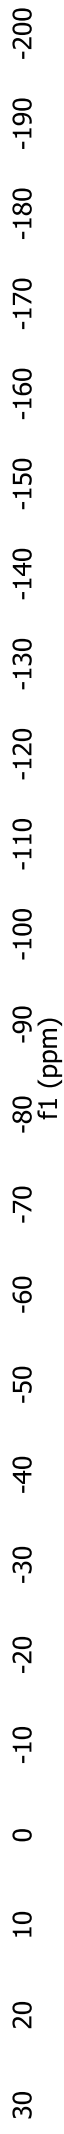

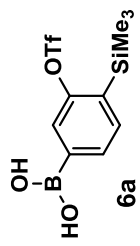

— 28.46

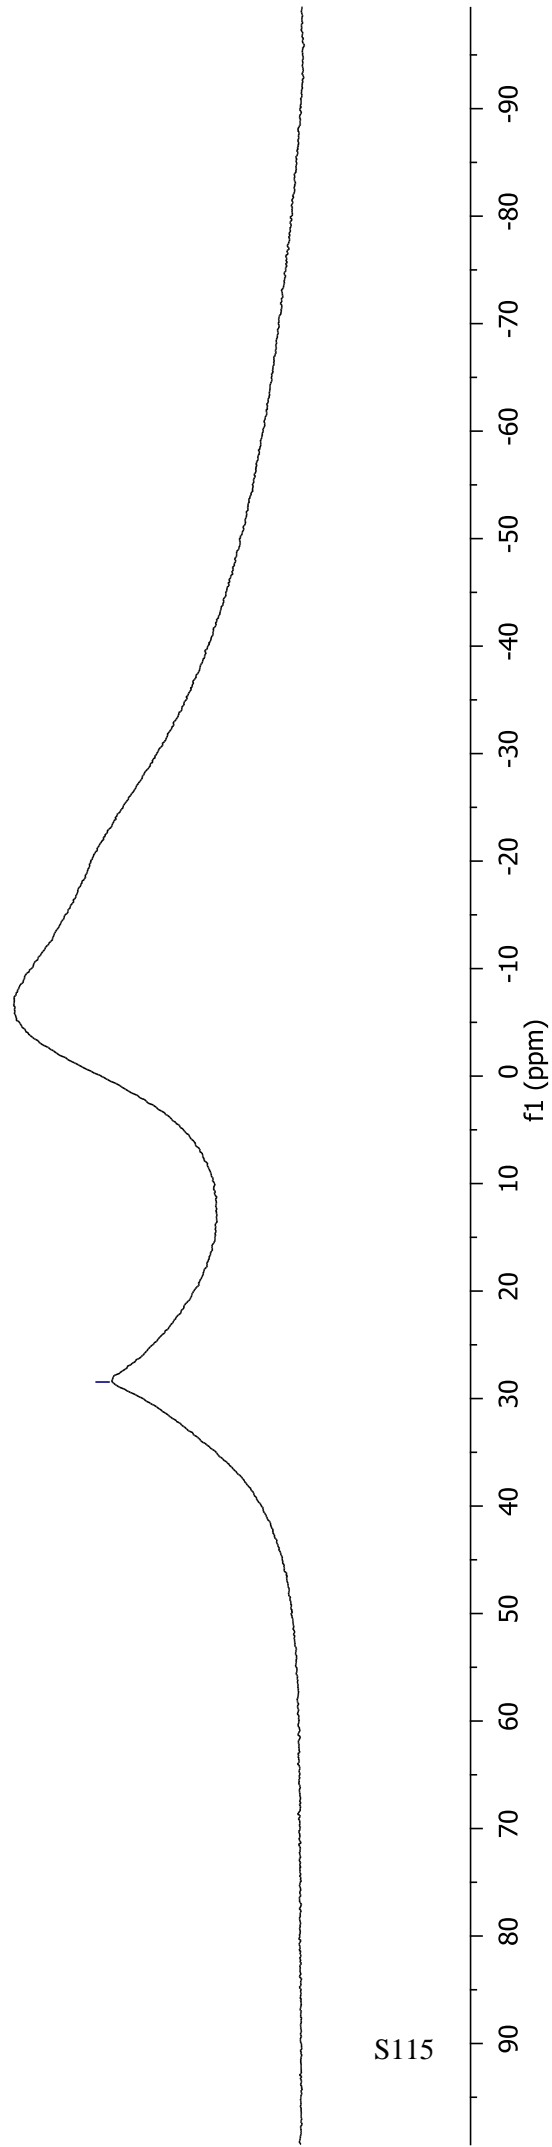

S115



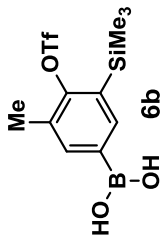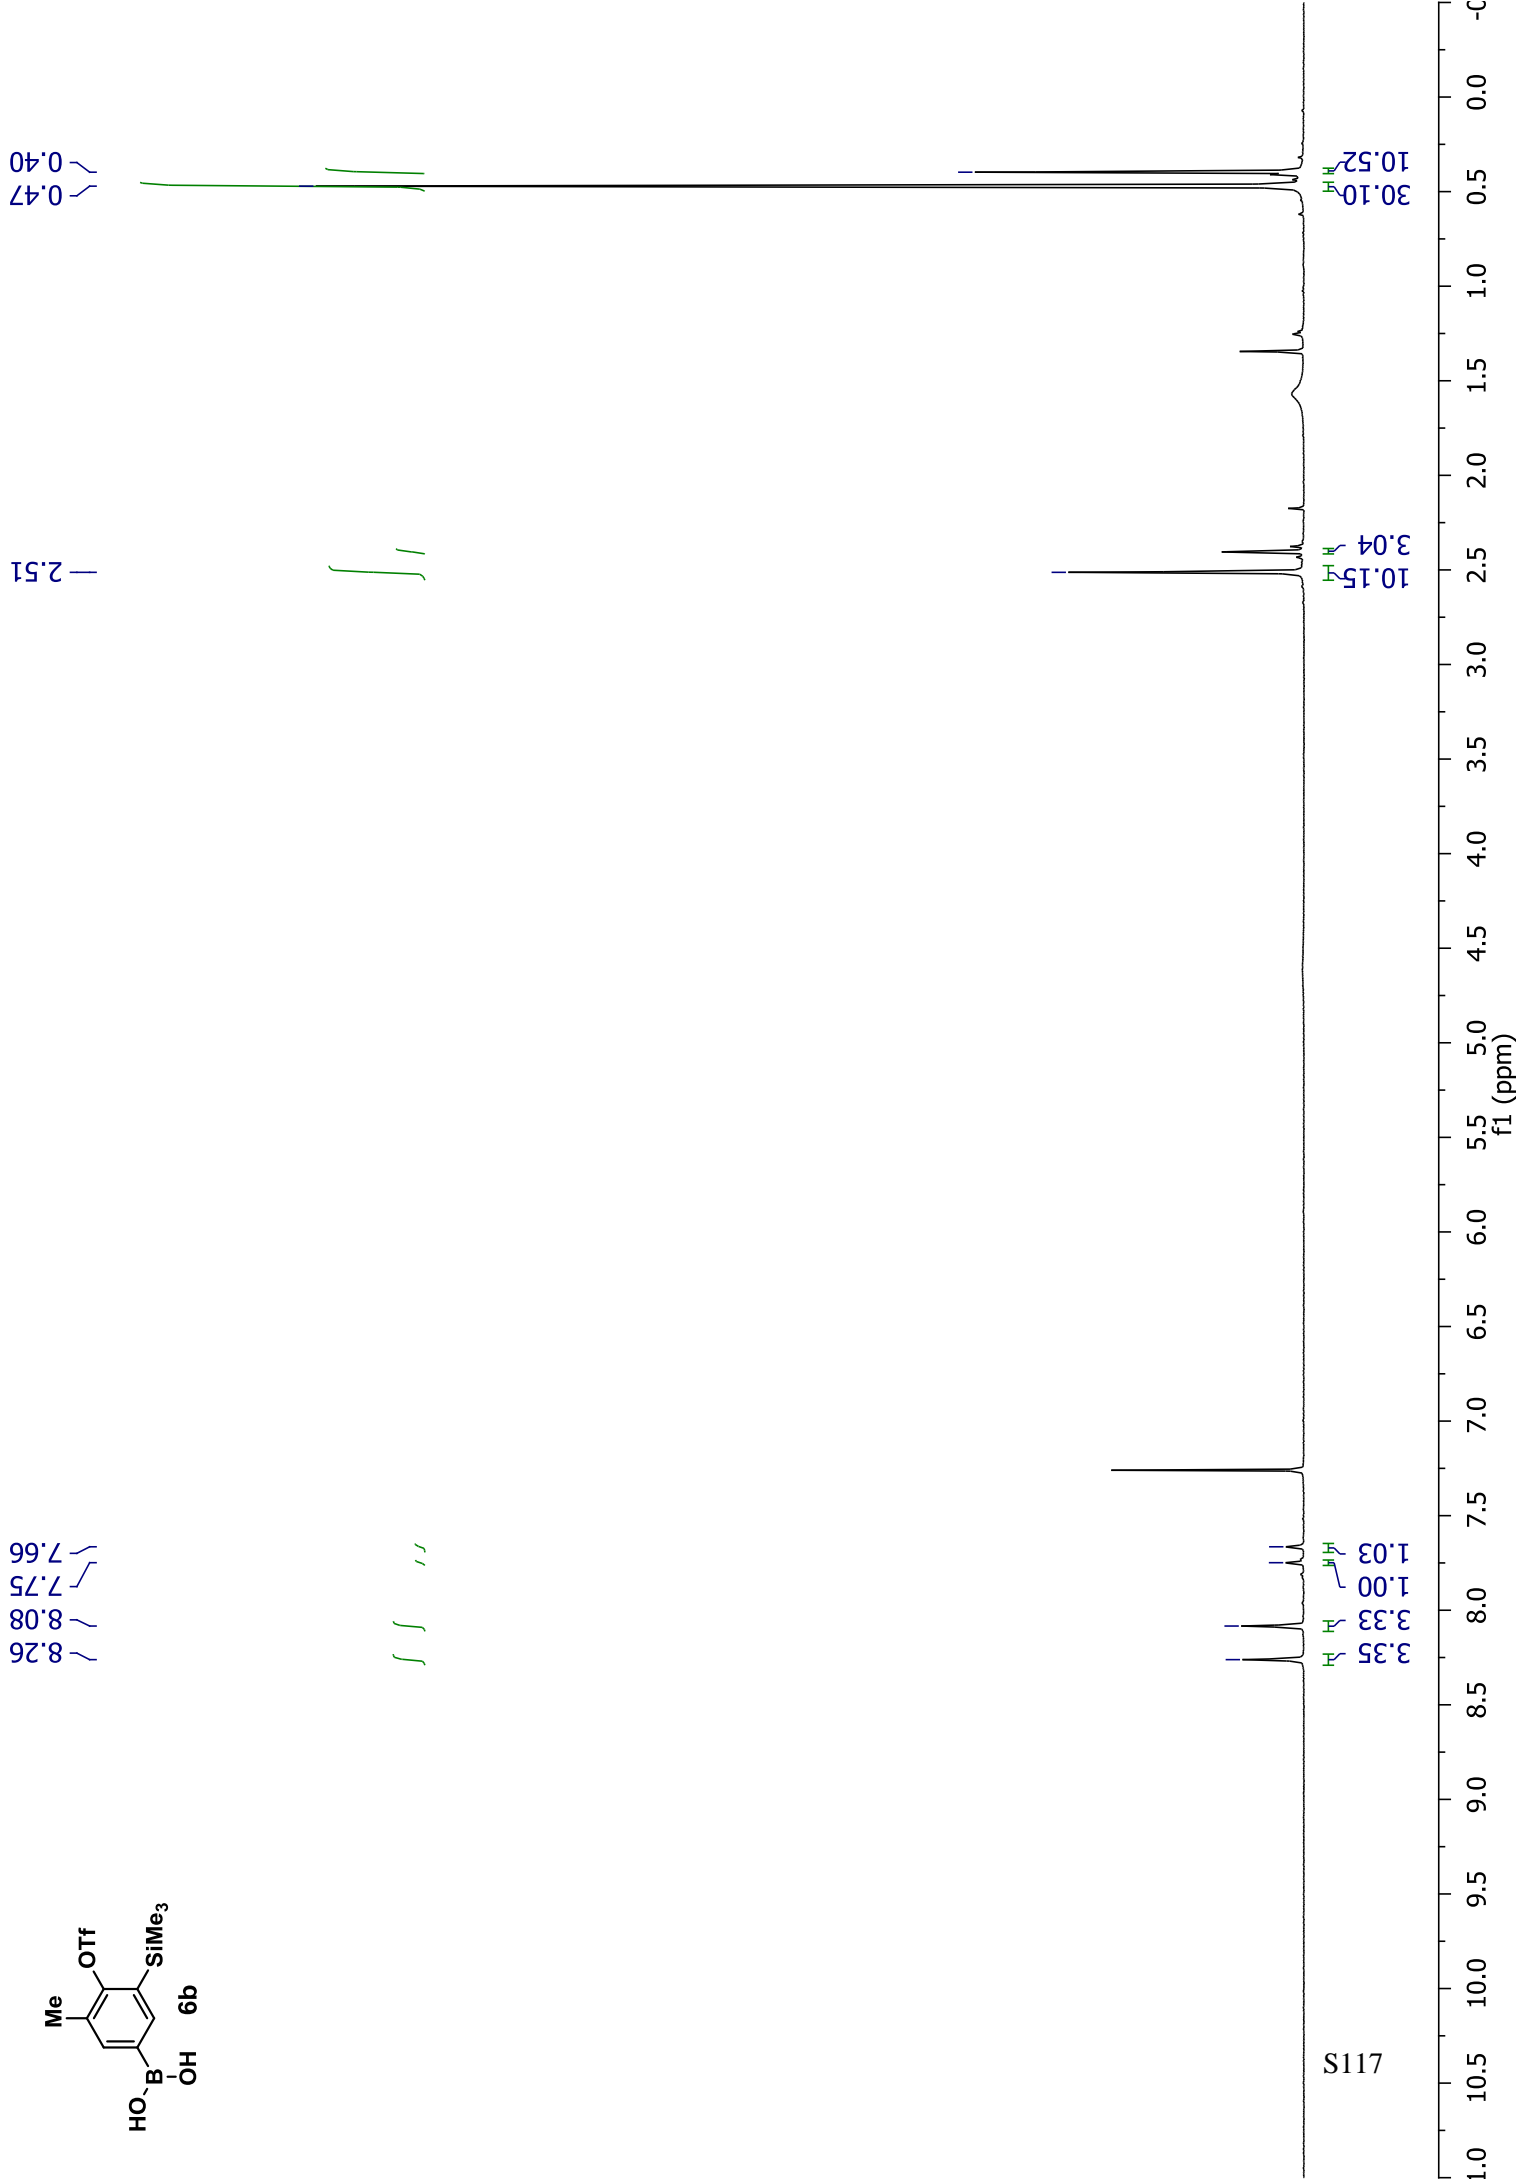

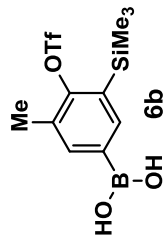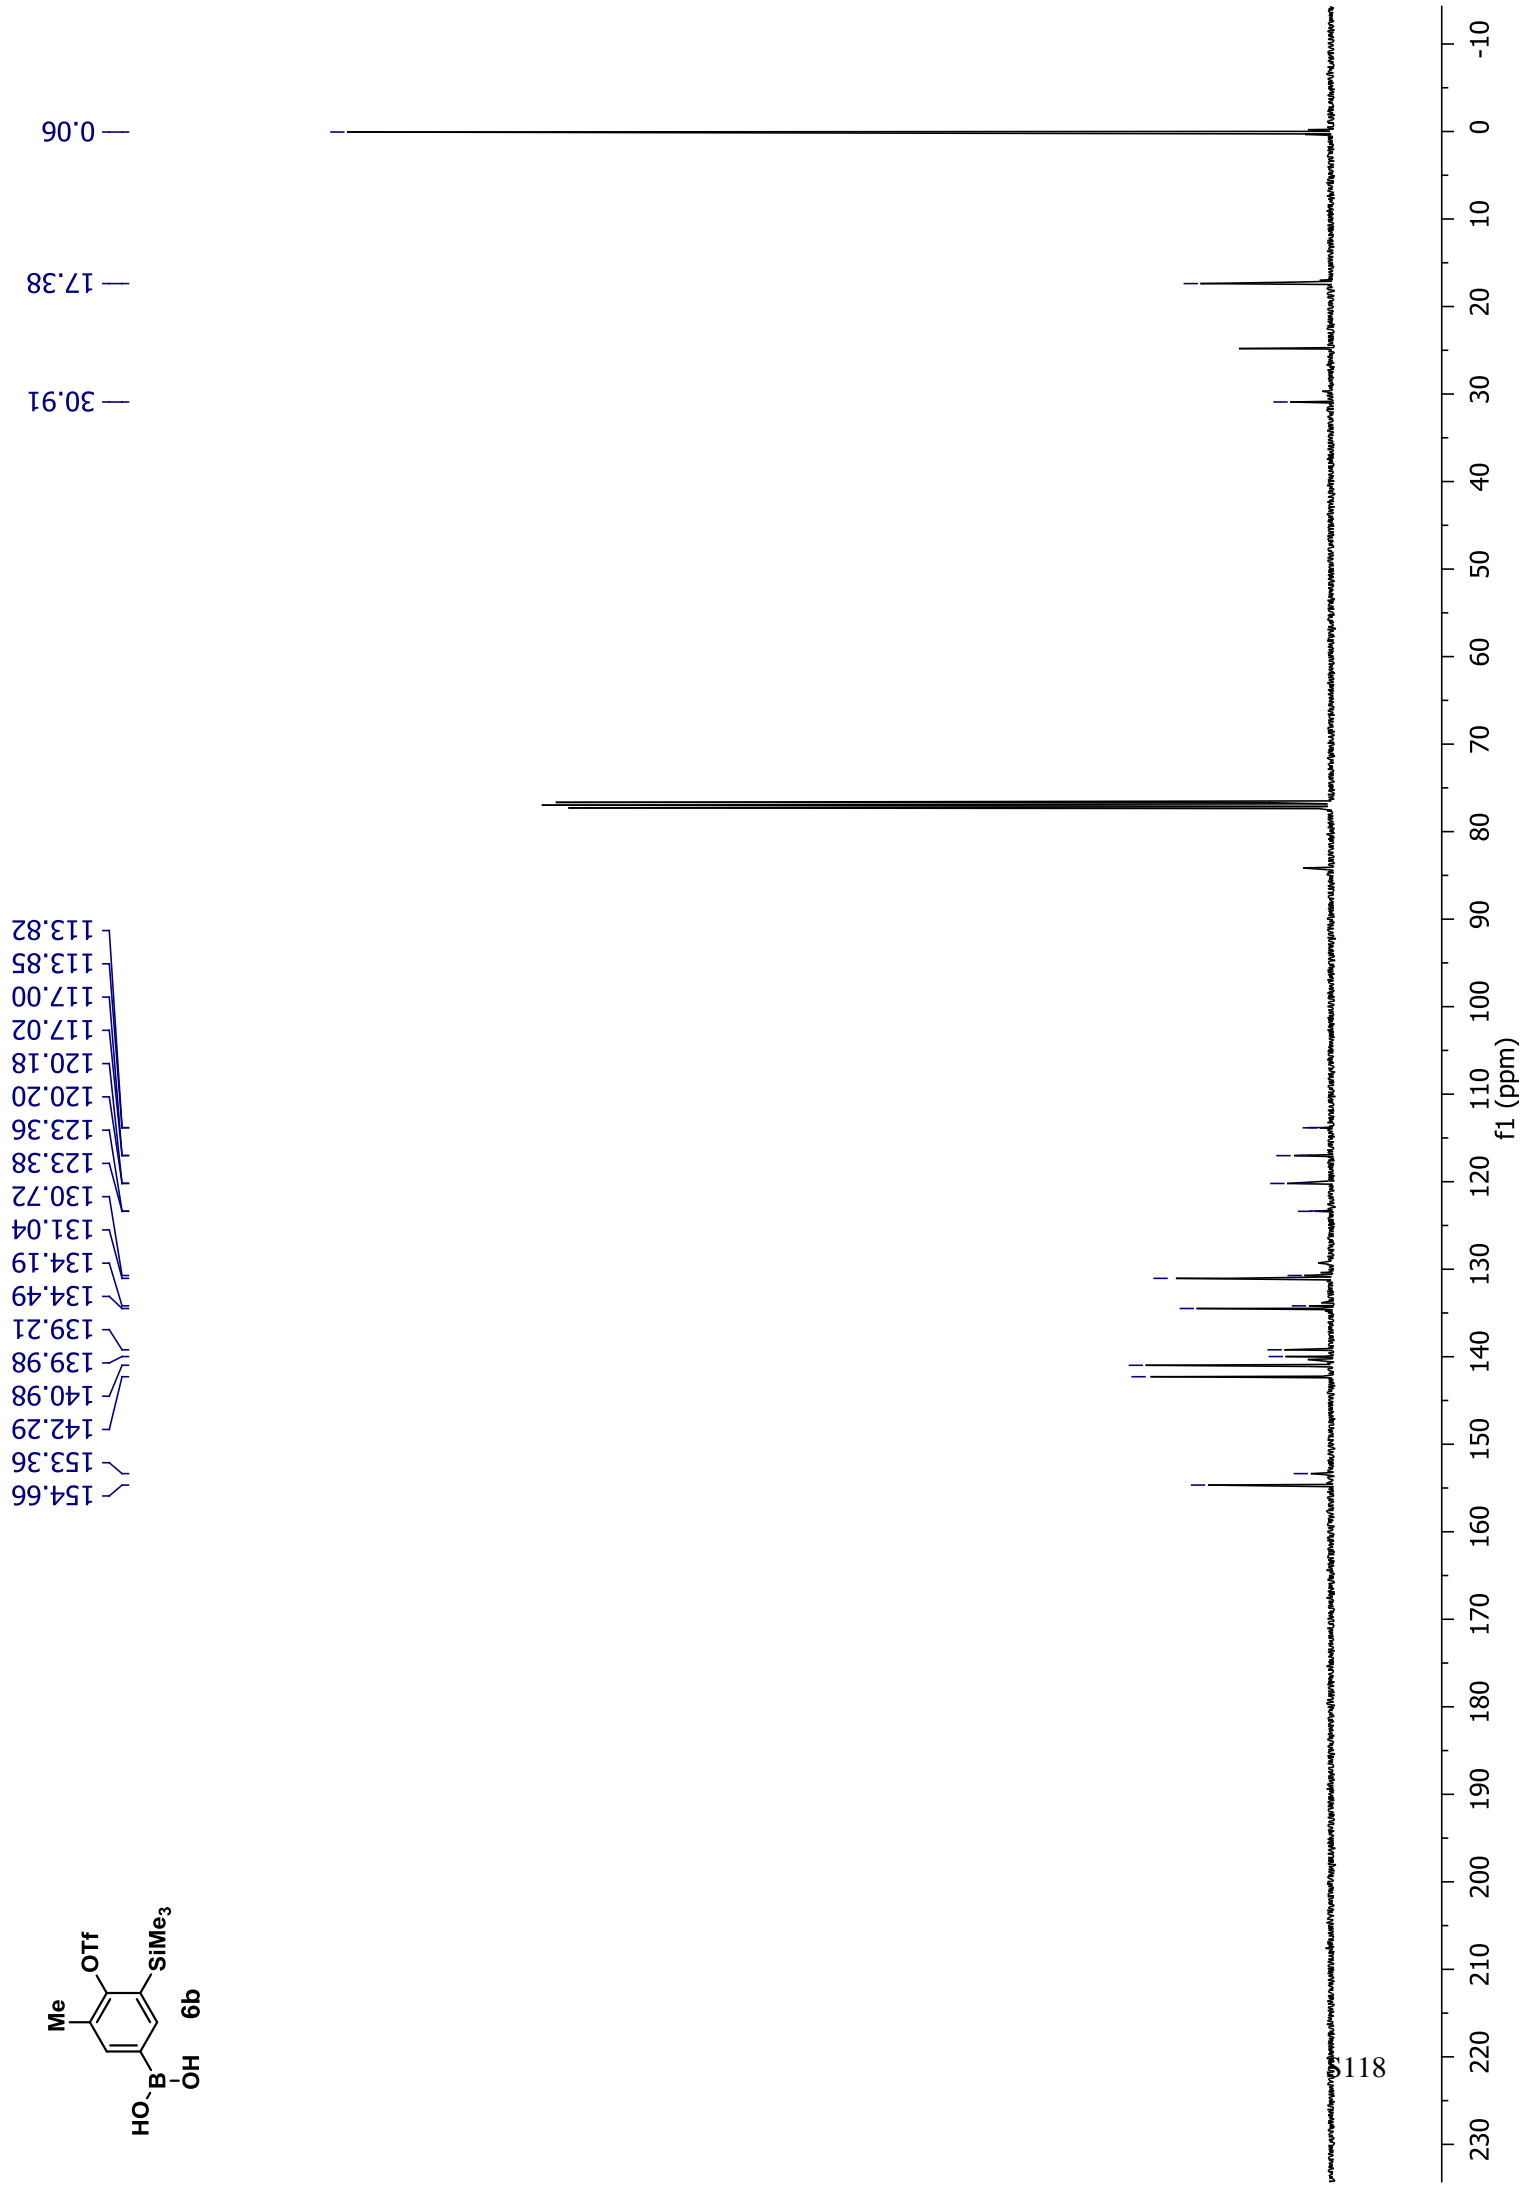

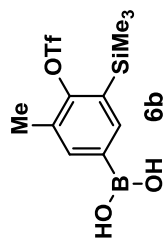

-73.19  
-73.31

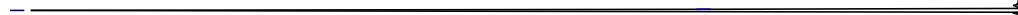

S119

30 20 10 0 -10 -20 -30 -40 -50 -60 -70 -80 -90 -100 -110 -120 -130 -140 -150 -160 -170 -180 -190 -200



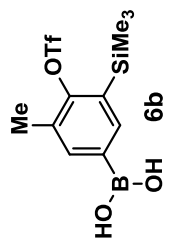

— 28.95

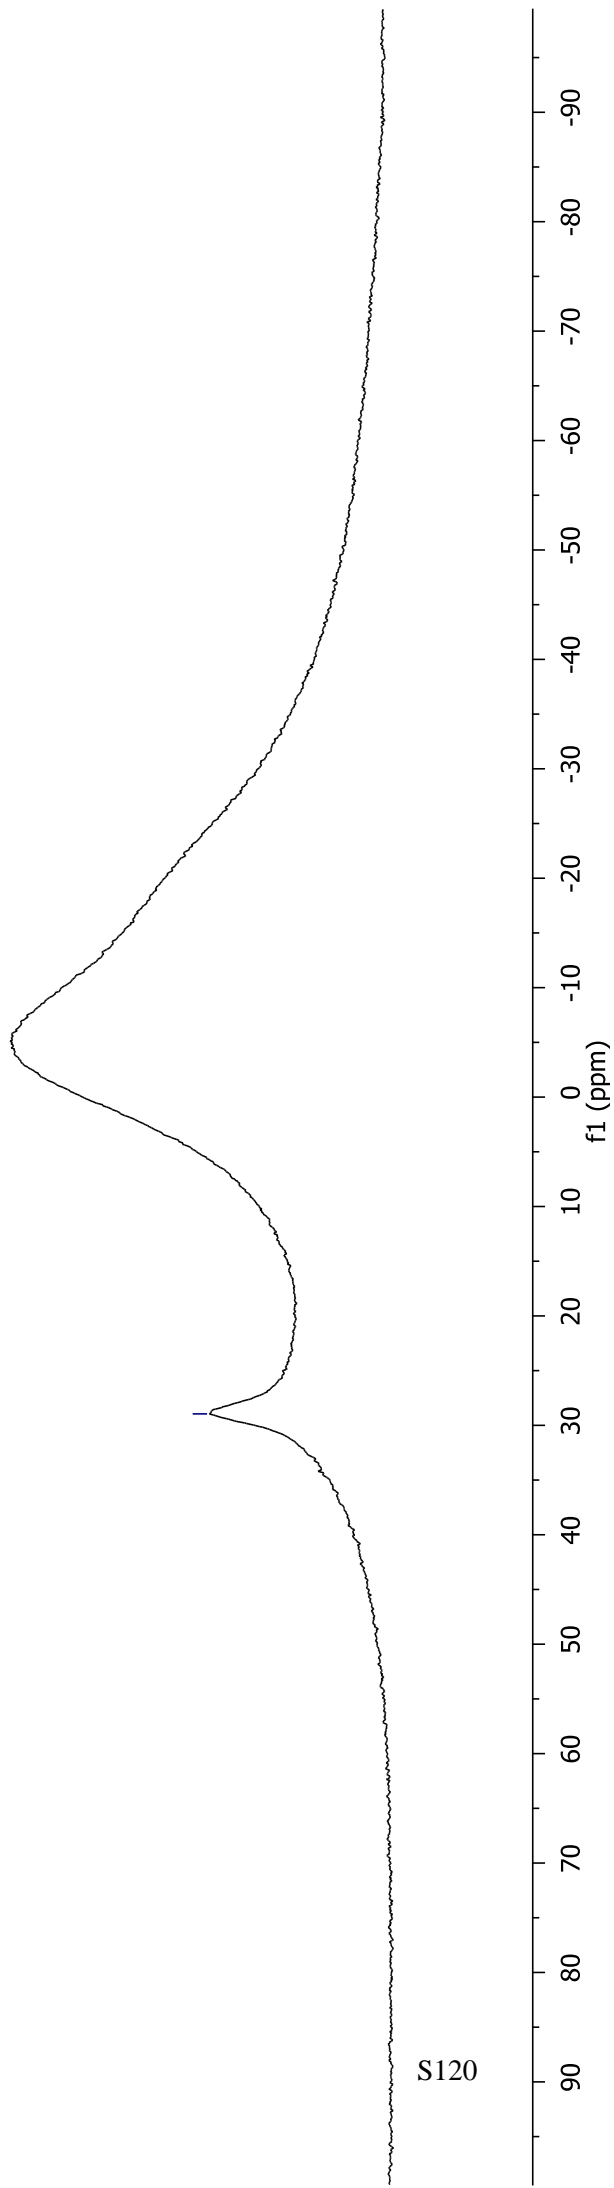

S120

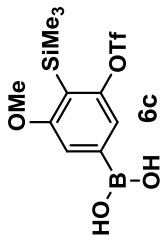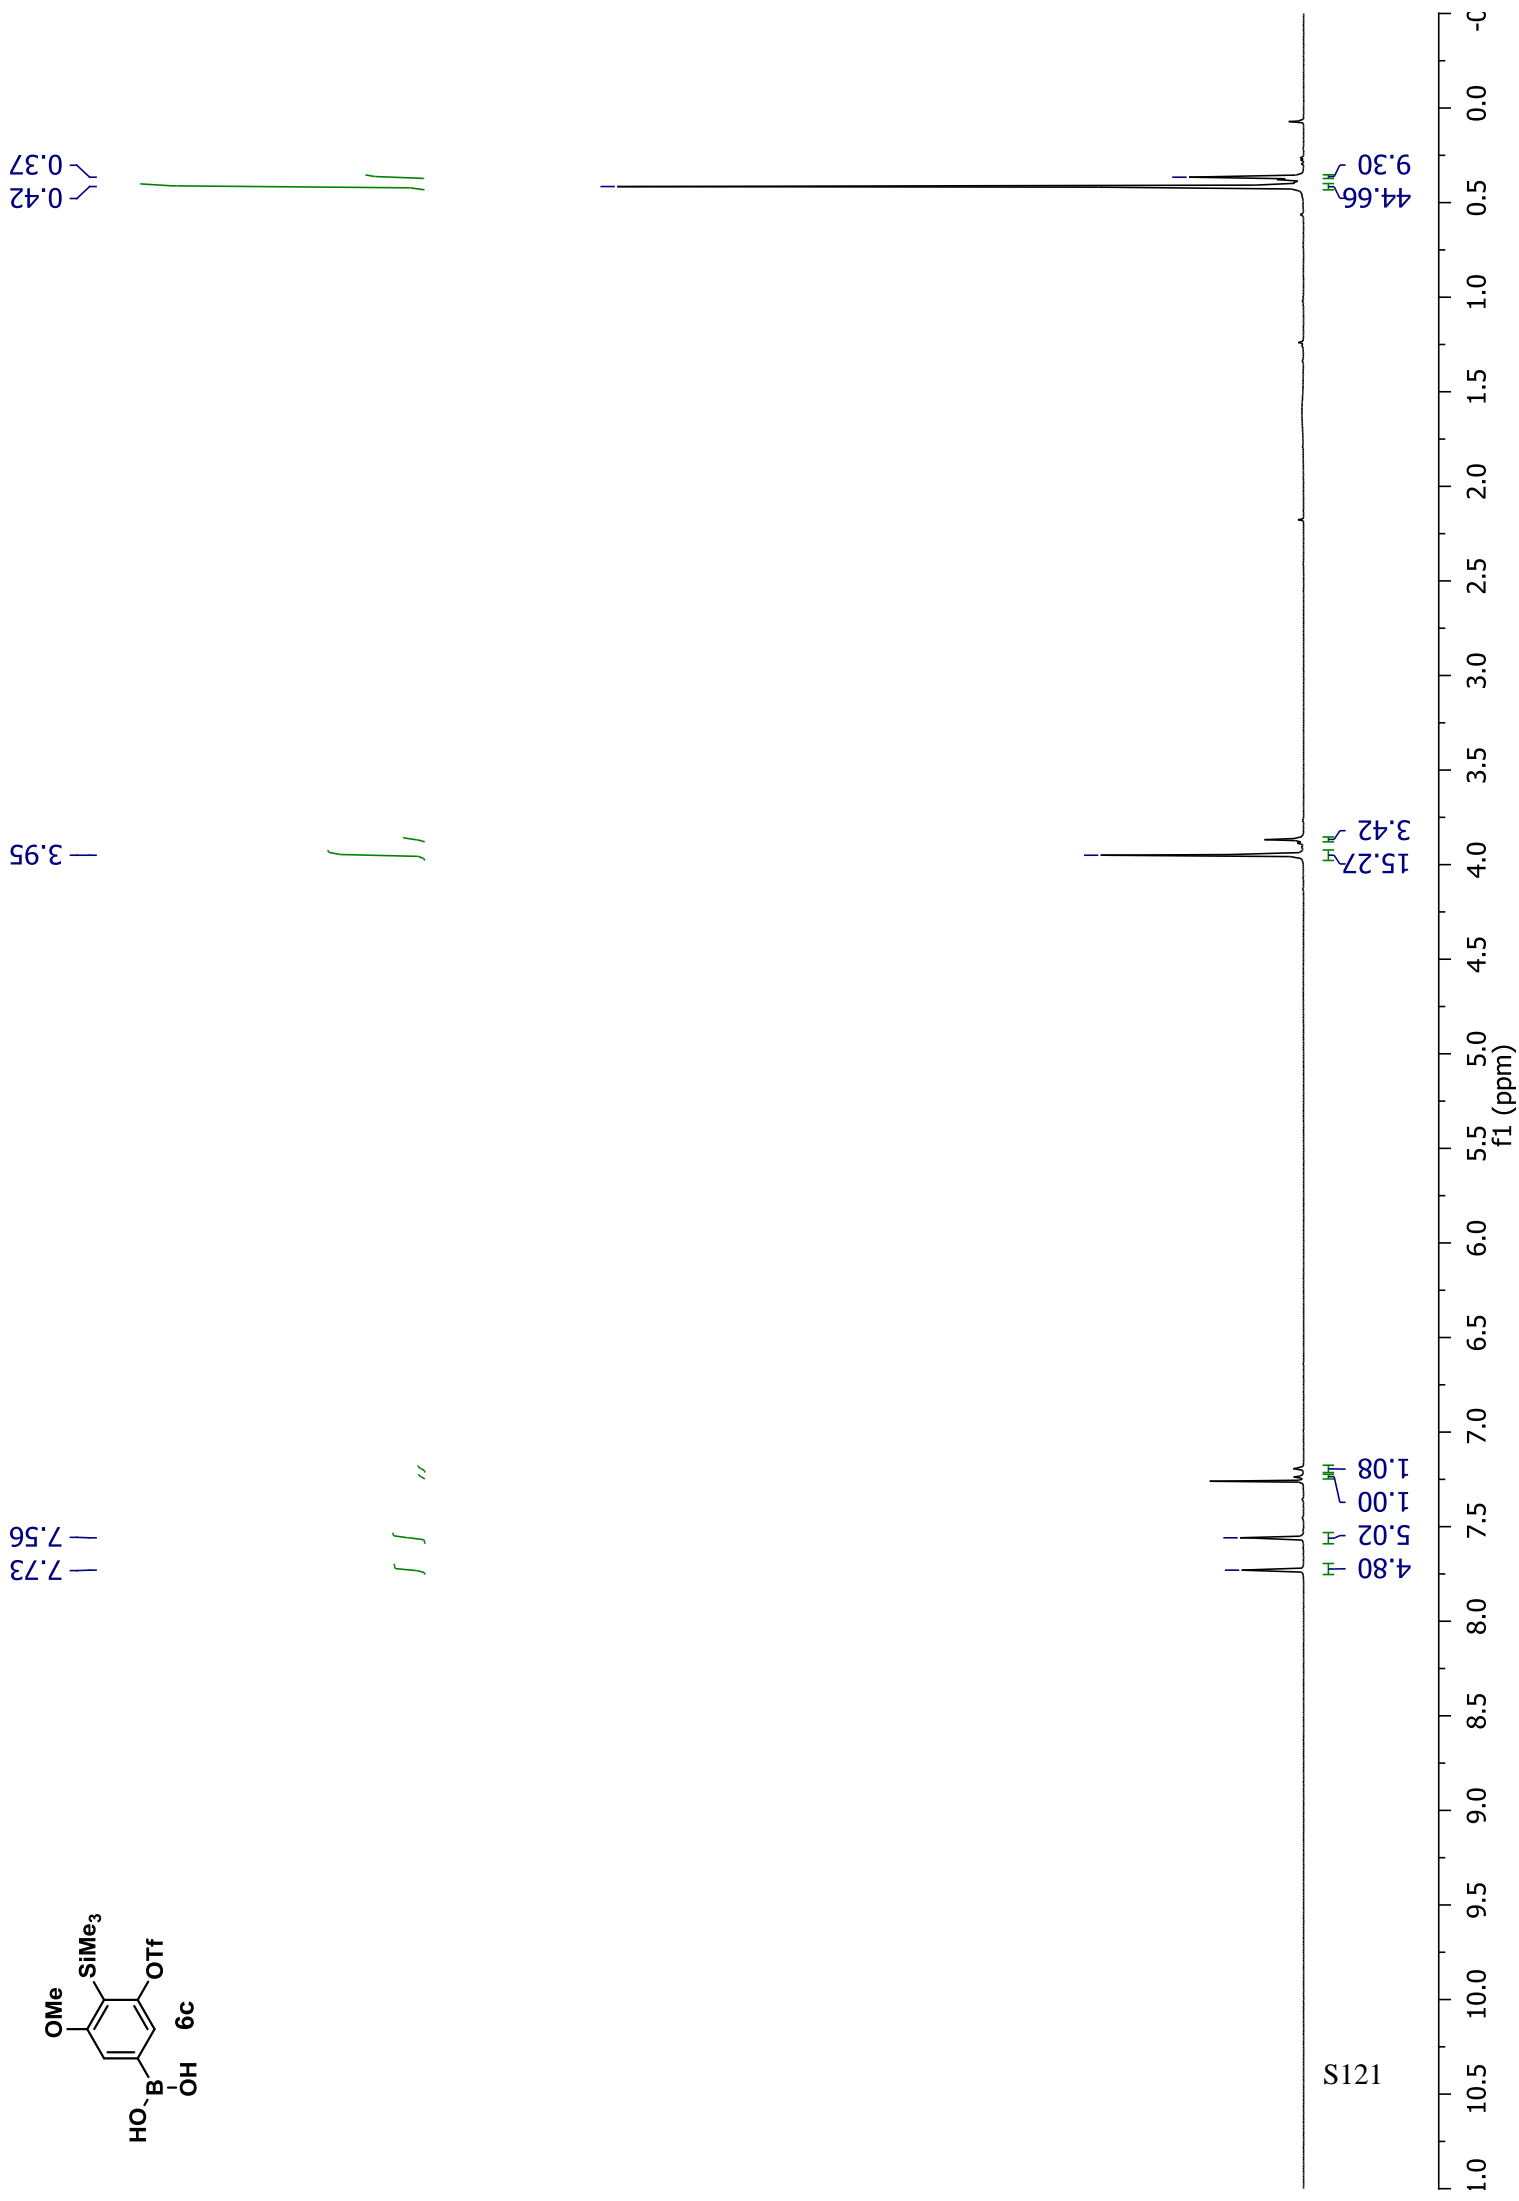

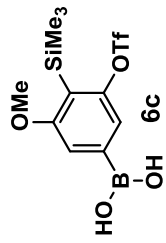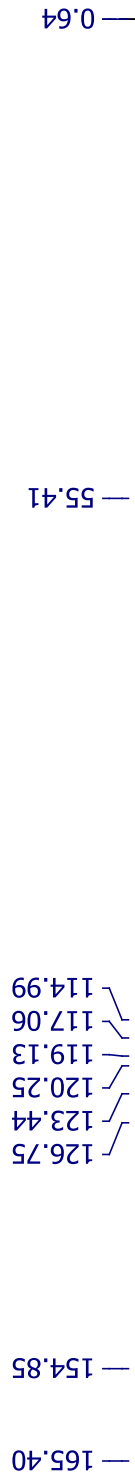

2122

f1 (ppm)

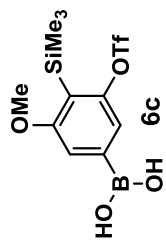

-72.98  
-72.82

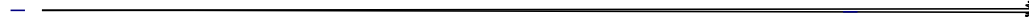

S123

30 20 10 0 -10 -20 -30 -40 -50 -60 -70 -80 -90 -100 -110 -120 -130 -140 -150 -160 -170 -180 -190 -200

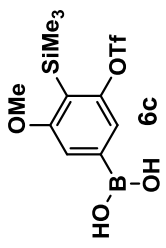

— 28.62

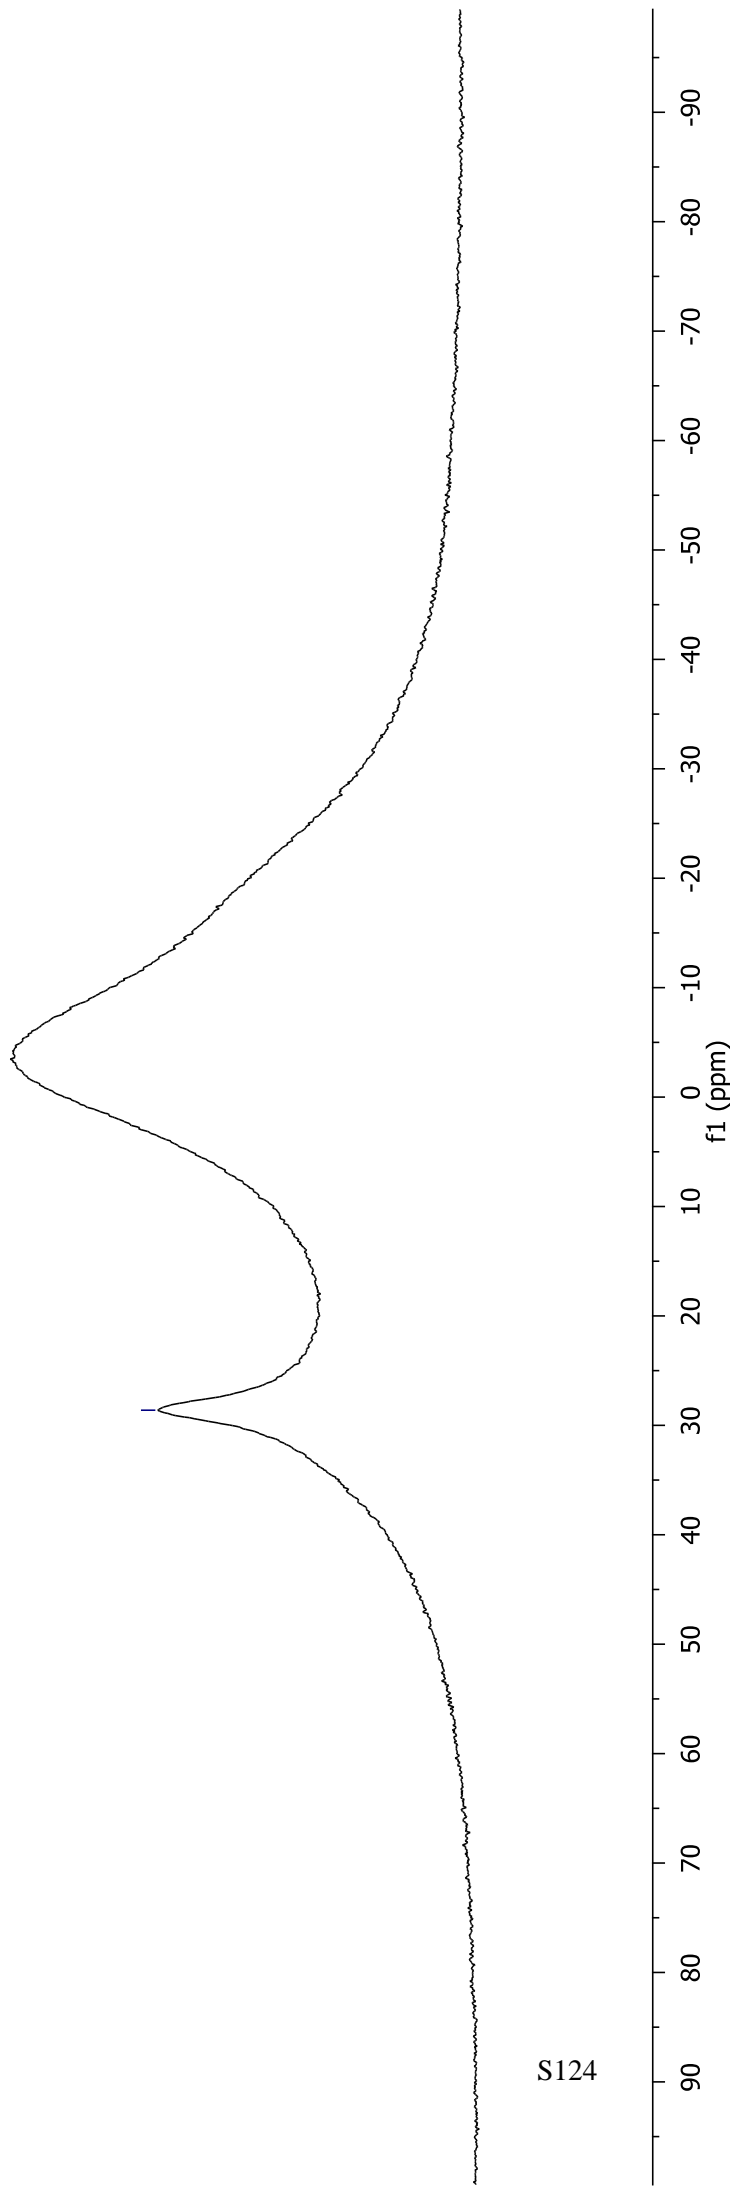

S124



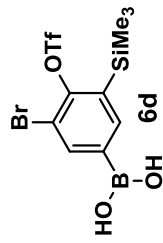

152.34  
143.16  
142.66  
137.77  
123.38  
120.19  
117.00  
116.94  
113.81

0.02

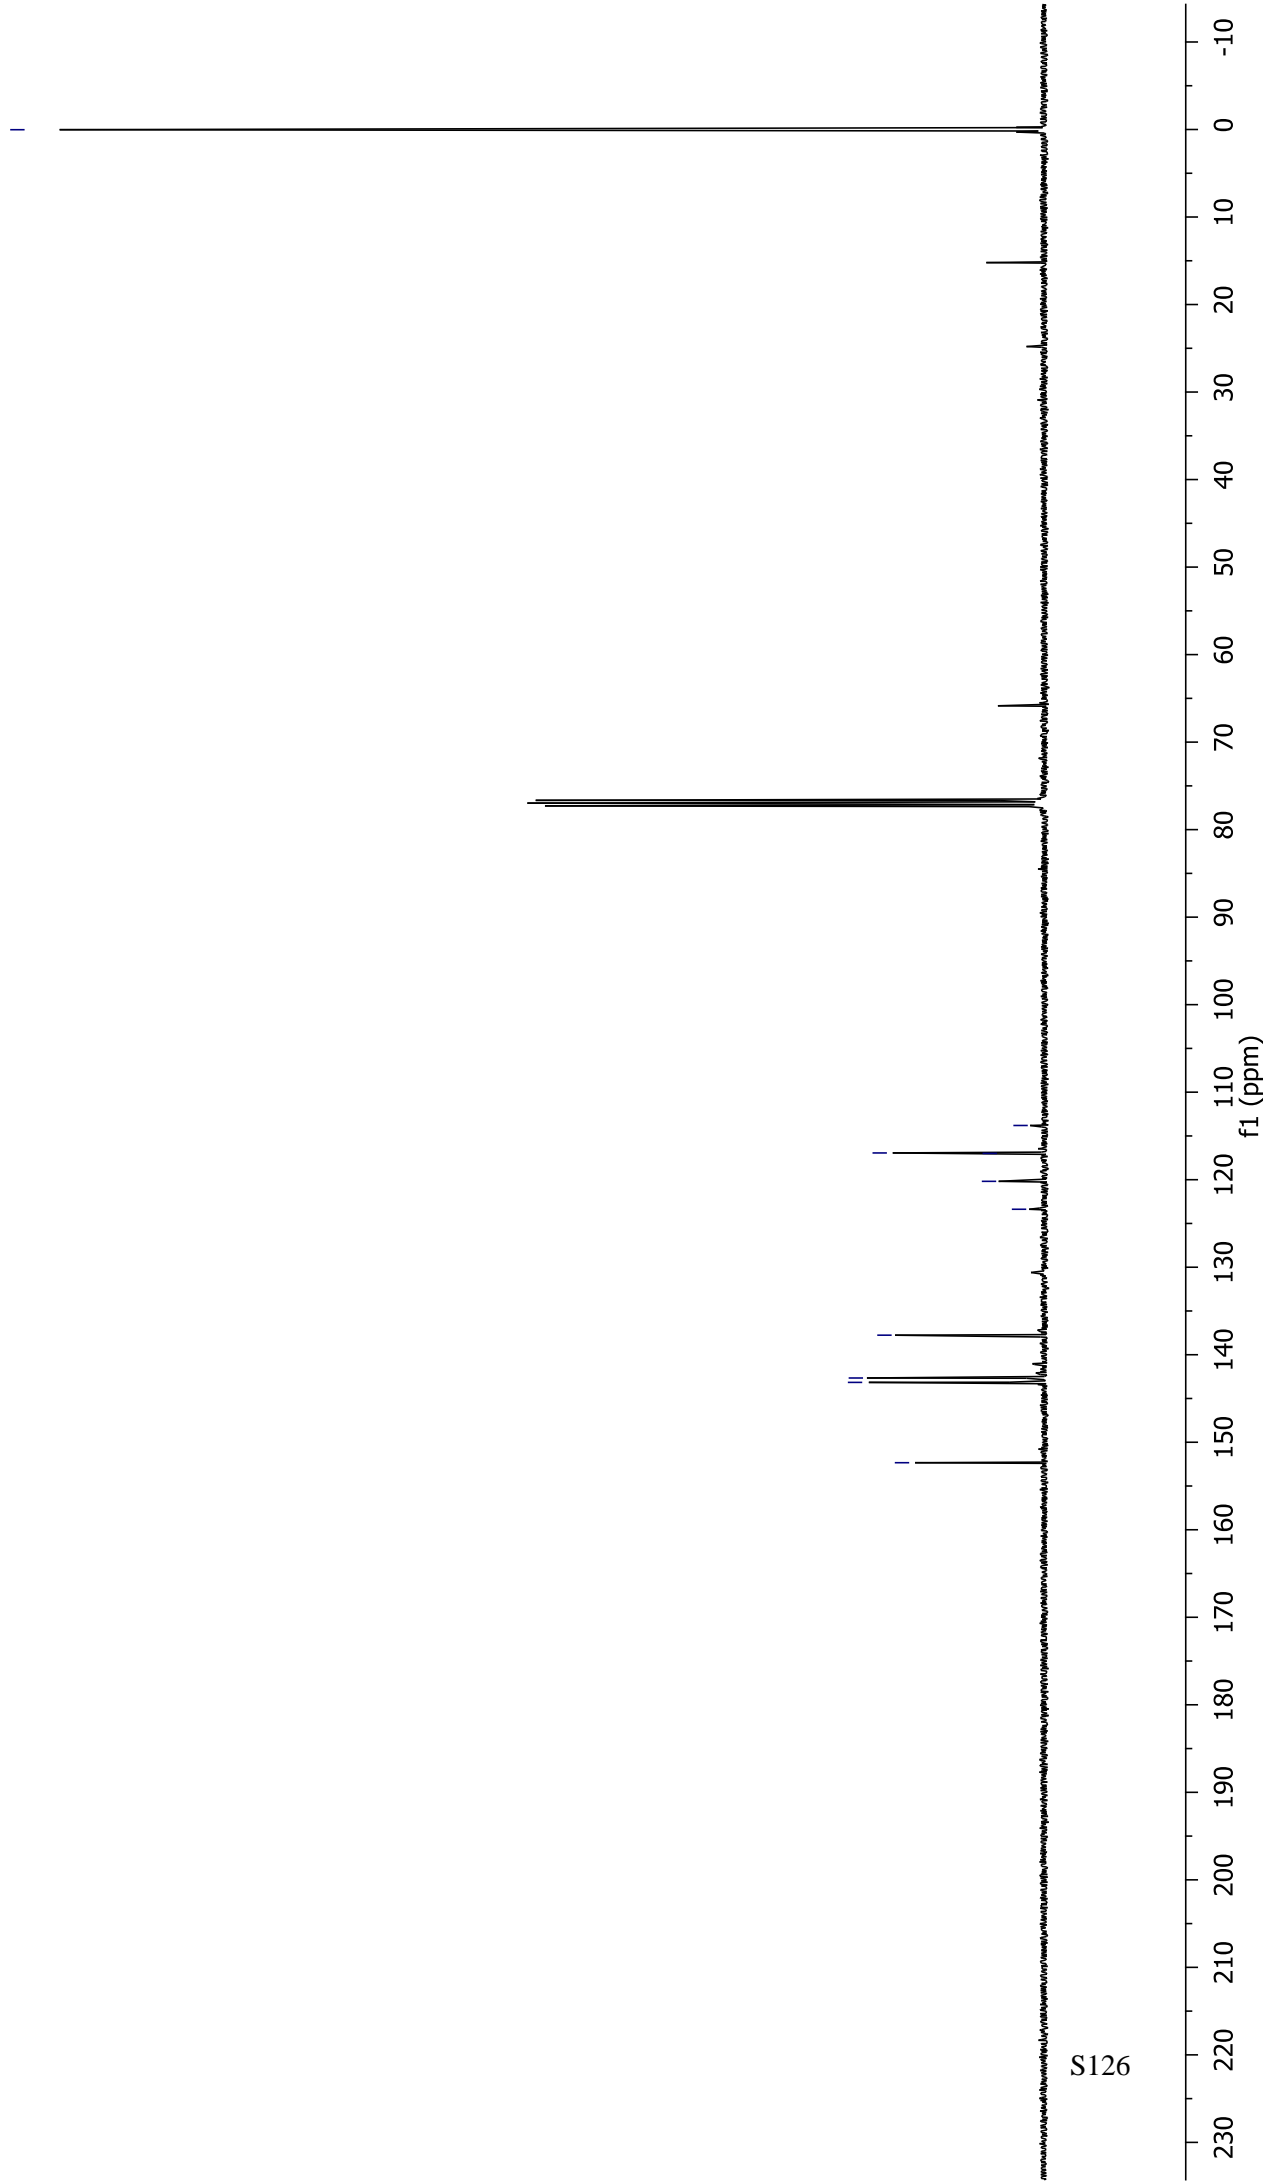

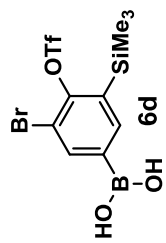

-71.41  
-71.61

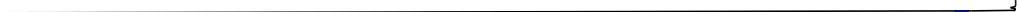

S127

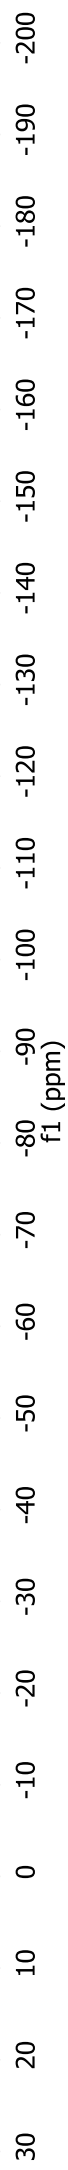



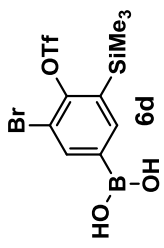

— 28.32

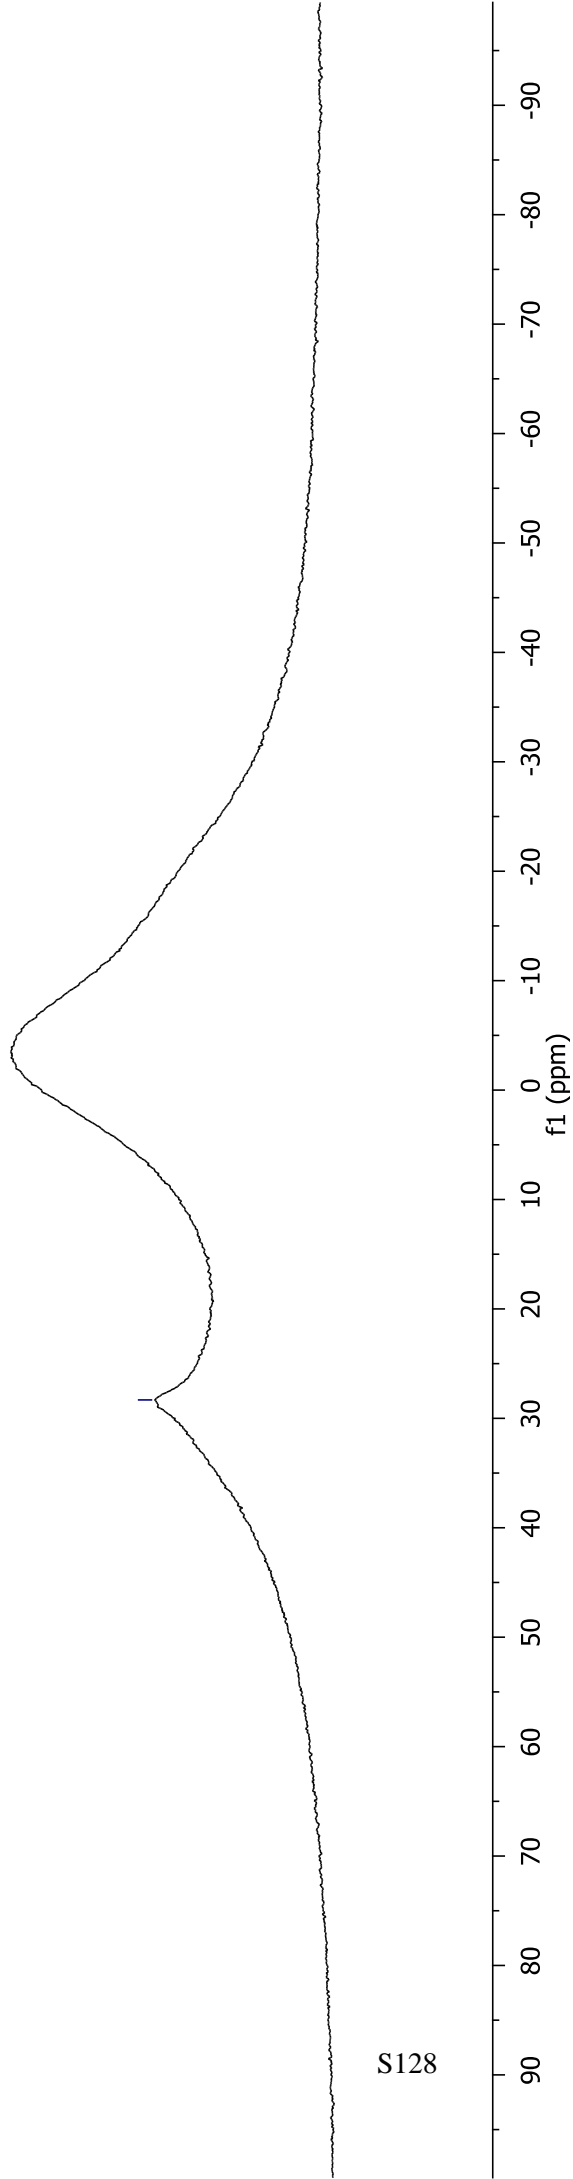

S128

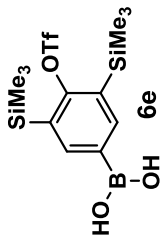

8.44  
8.42

0.46

6T1S

2.00  
0.34

20.71

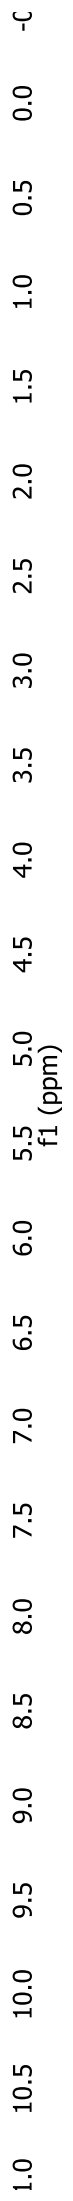

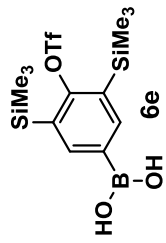

158.59  
145.81  
134.57  
123.19  
120.01  
116.82

0.29

130

f1 (ppm)

230 220 210 200 190 180 170 160 150 140 130 120 110 100 90 80 70 60 50 40 30 20 10 0 -10



-72.28  
-72.32

S131

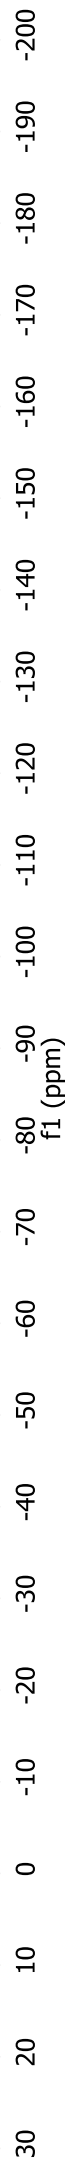

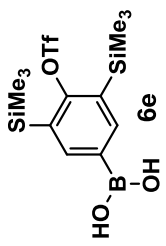

— 28.81

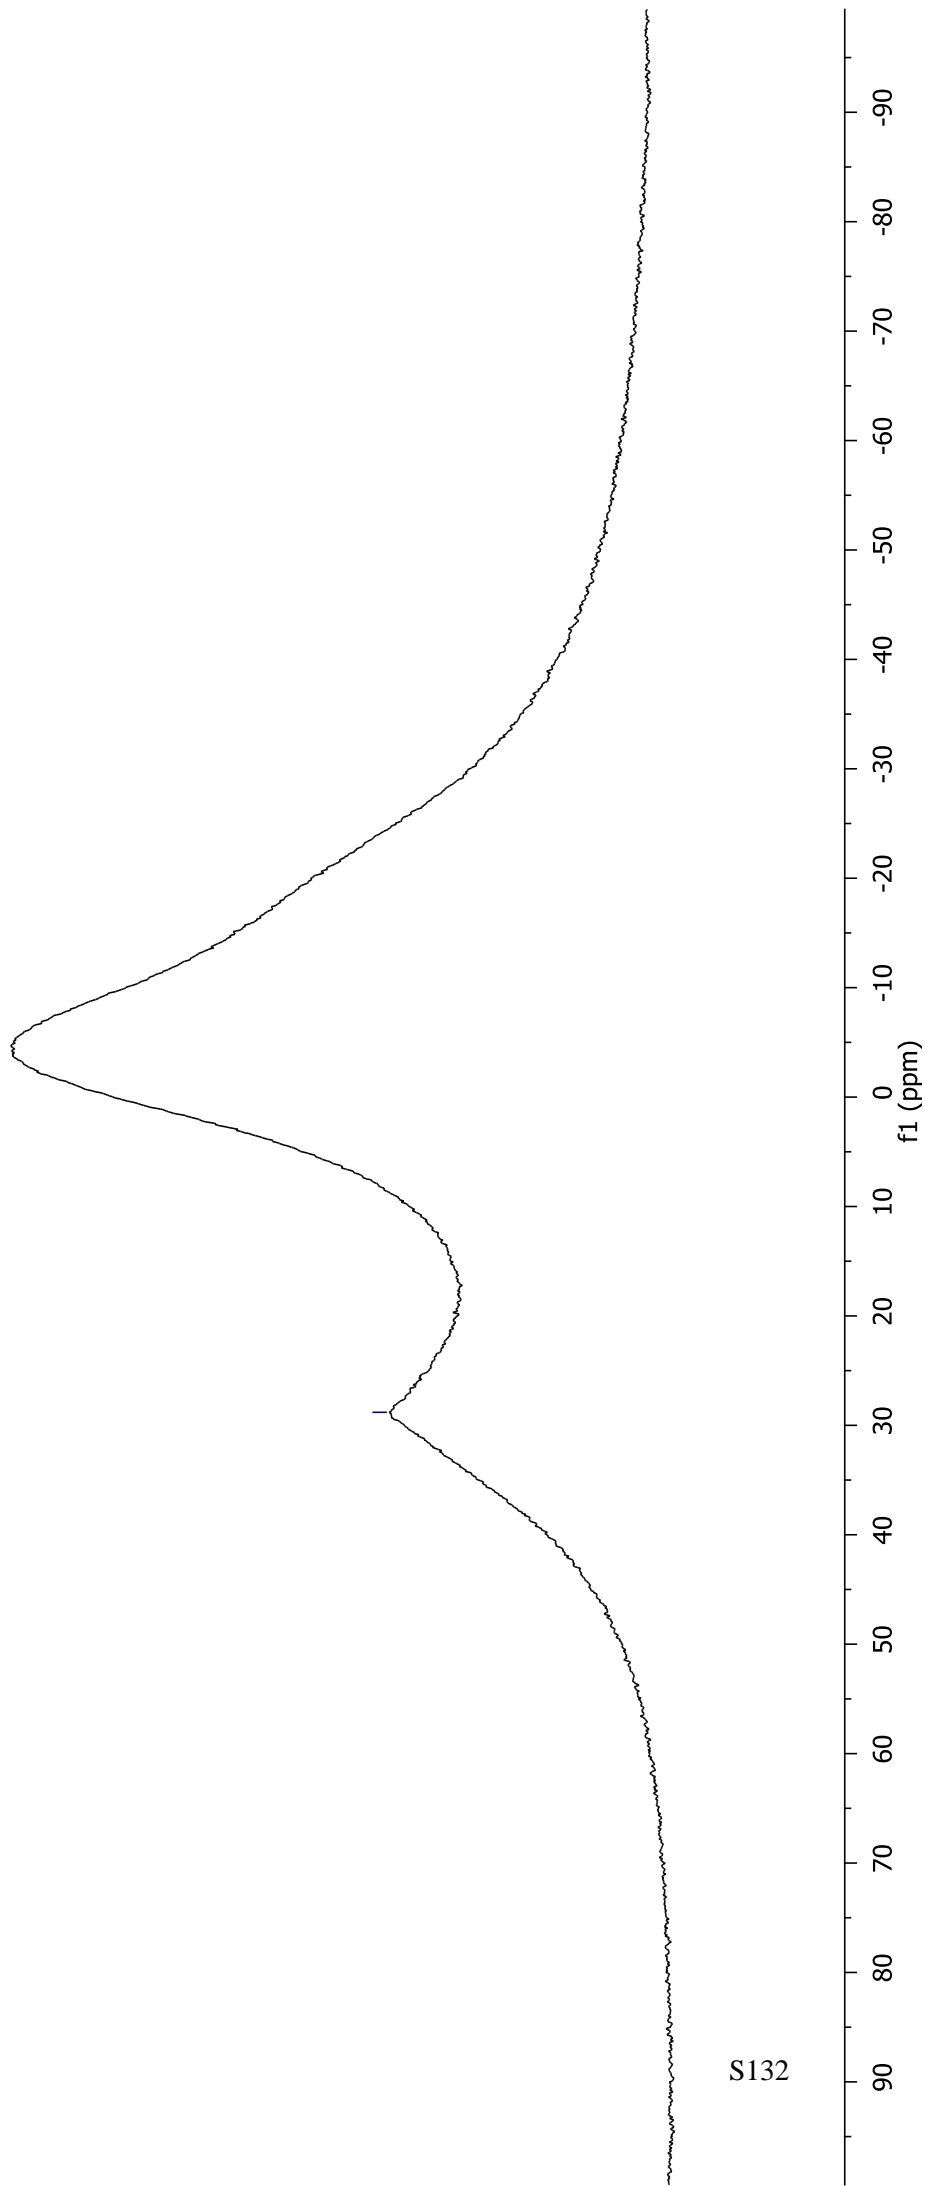

S132

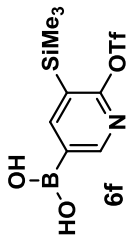

9.02  
8.61  
8.27  
8.26

0.44

CS13

1.00

1.14

0.11

9.44  
1.11

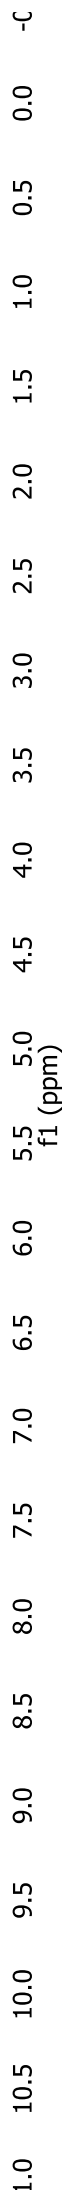

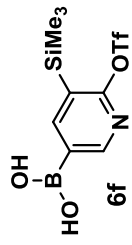

124.66  
123.18  
120.00  
116.81  
113.62

163.87  
156.18  
154.06

-1.66

S134

f1 (ppm)

230 220 210 200 190 180 170 160 150 140 130 120 110 100 90 80 70 60 50 40 30 20 10 0 -10

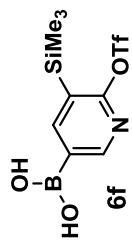

— -72.96

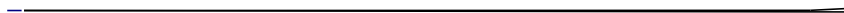

S135

30 20 10 0 10 20 30 40 50 60 70 80 90 100 110 120 130 140 150 160 170 180 190 200





— 28.65

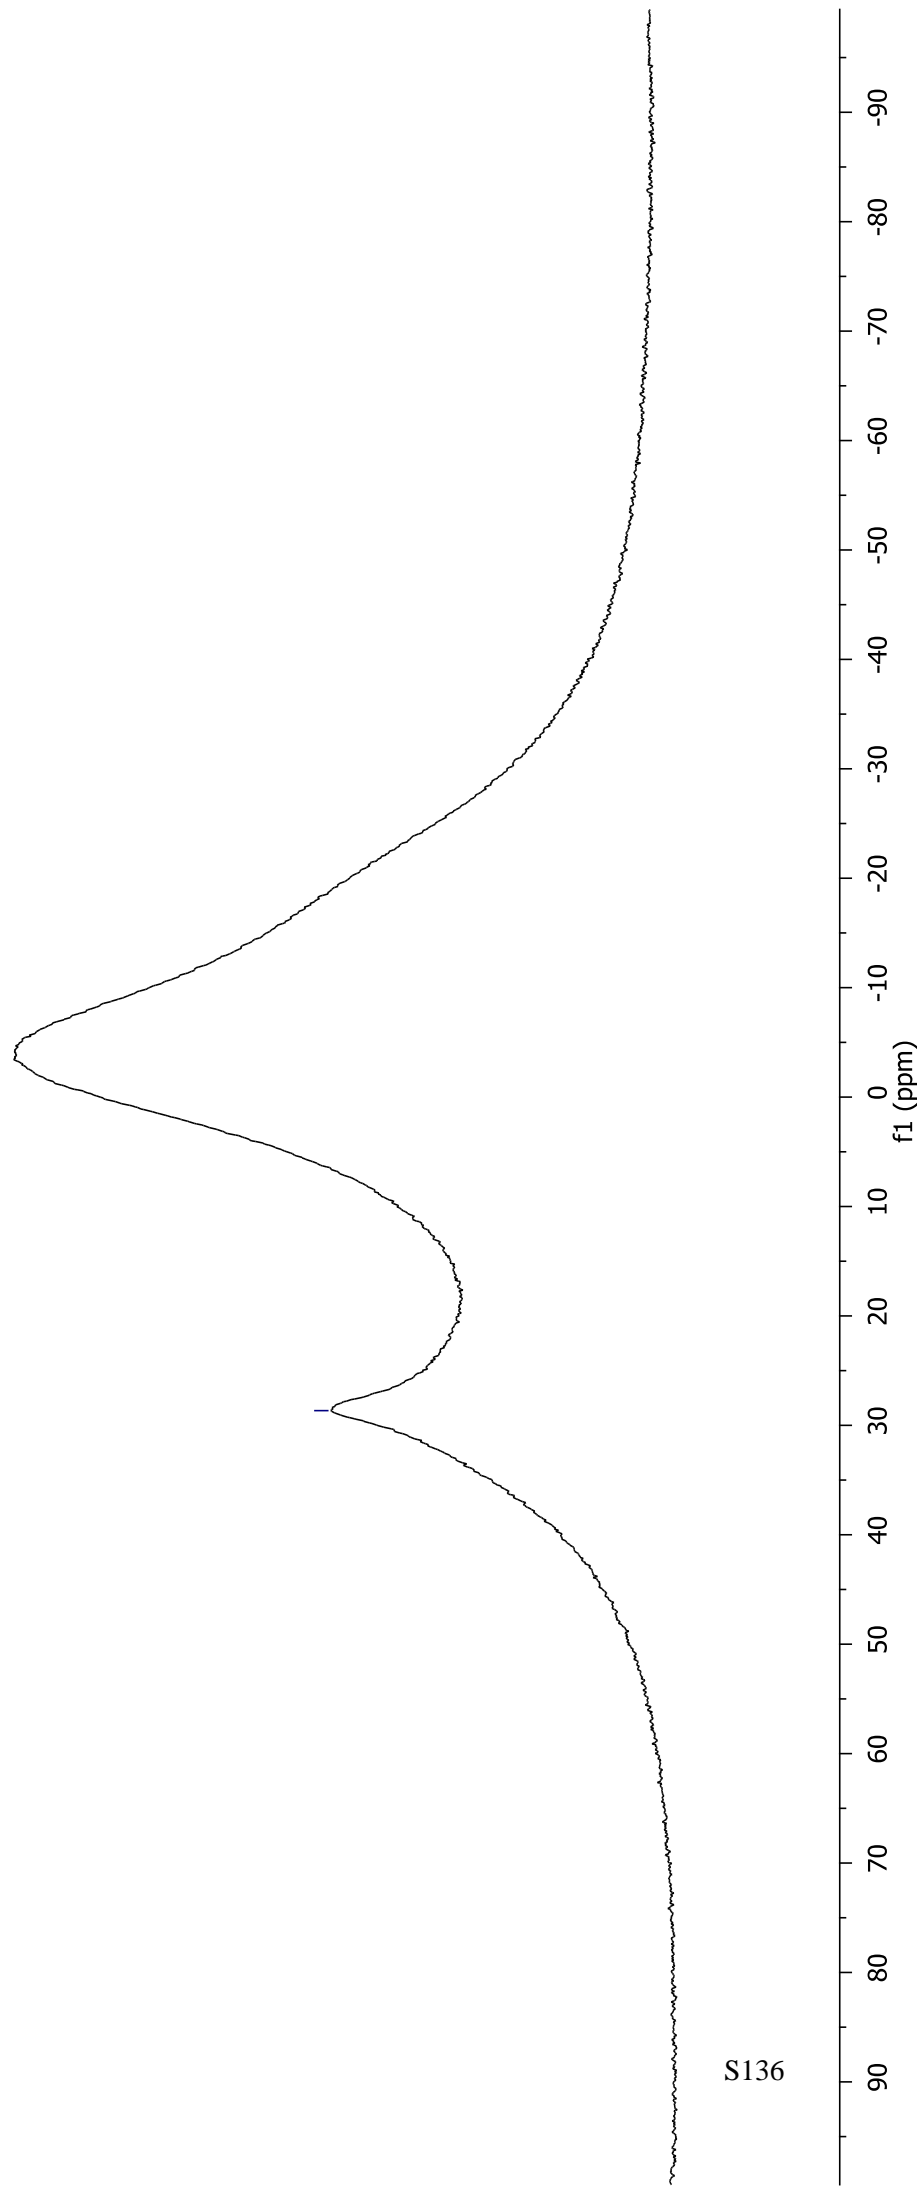

S136

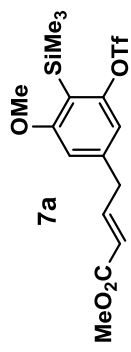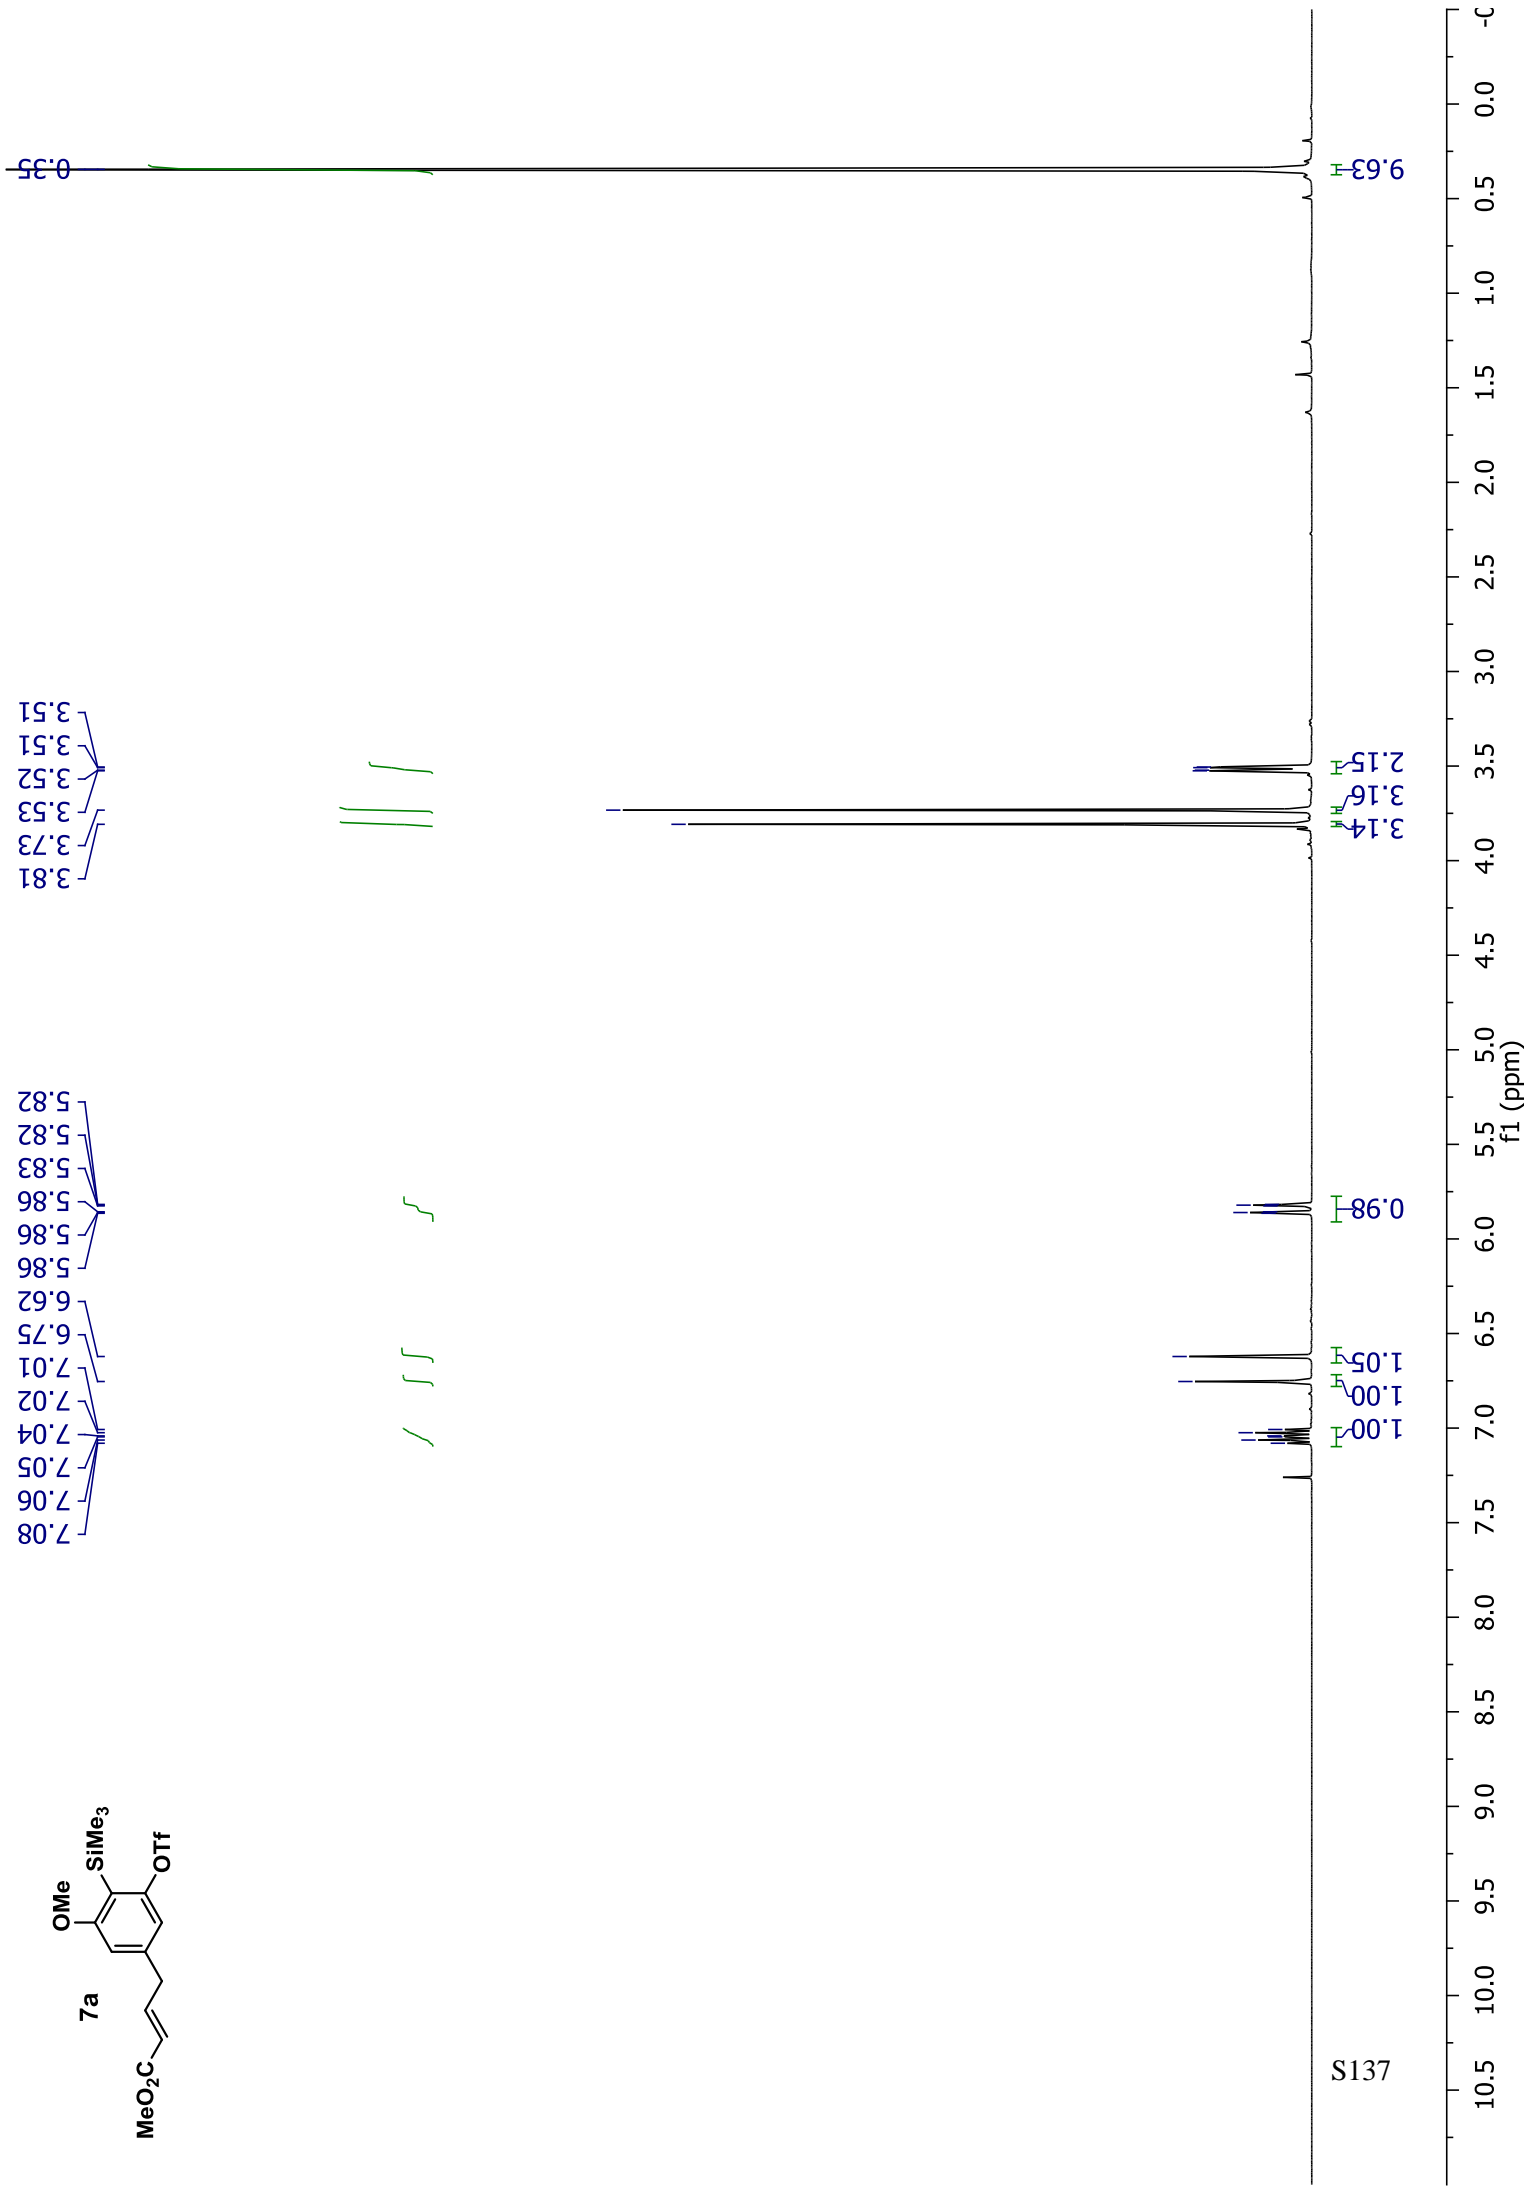

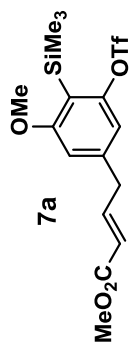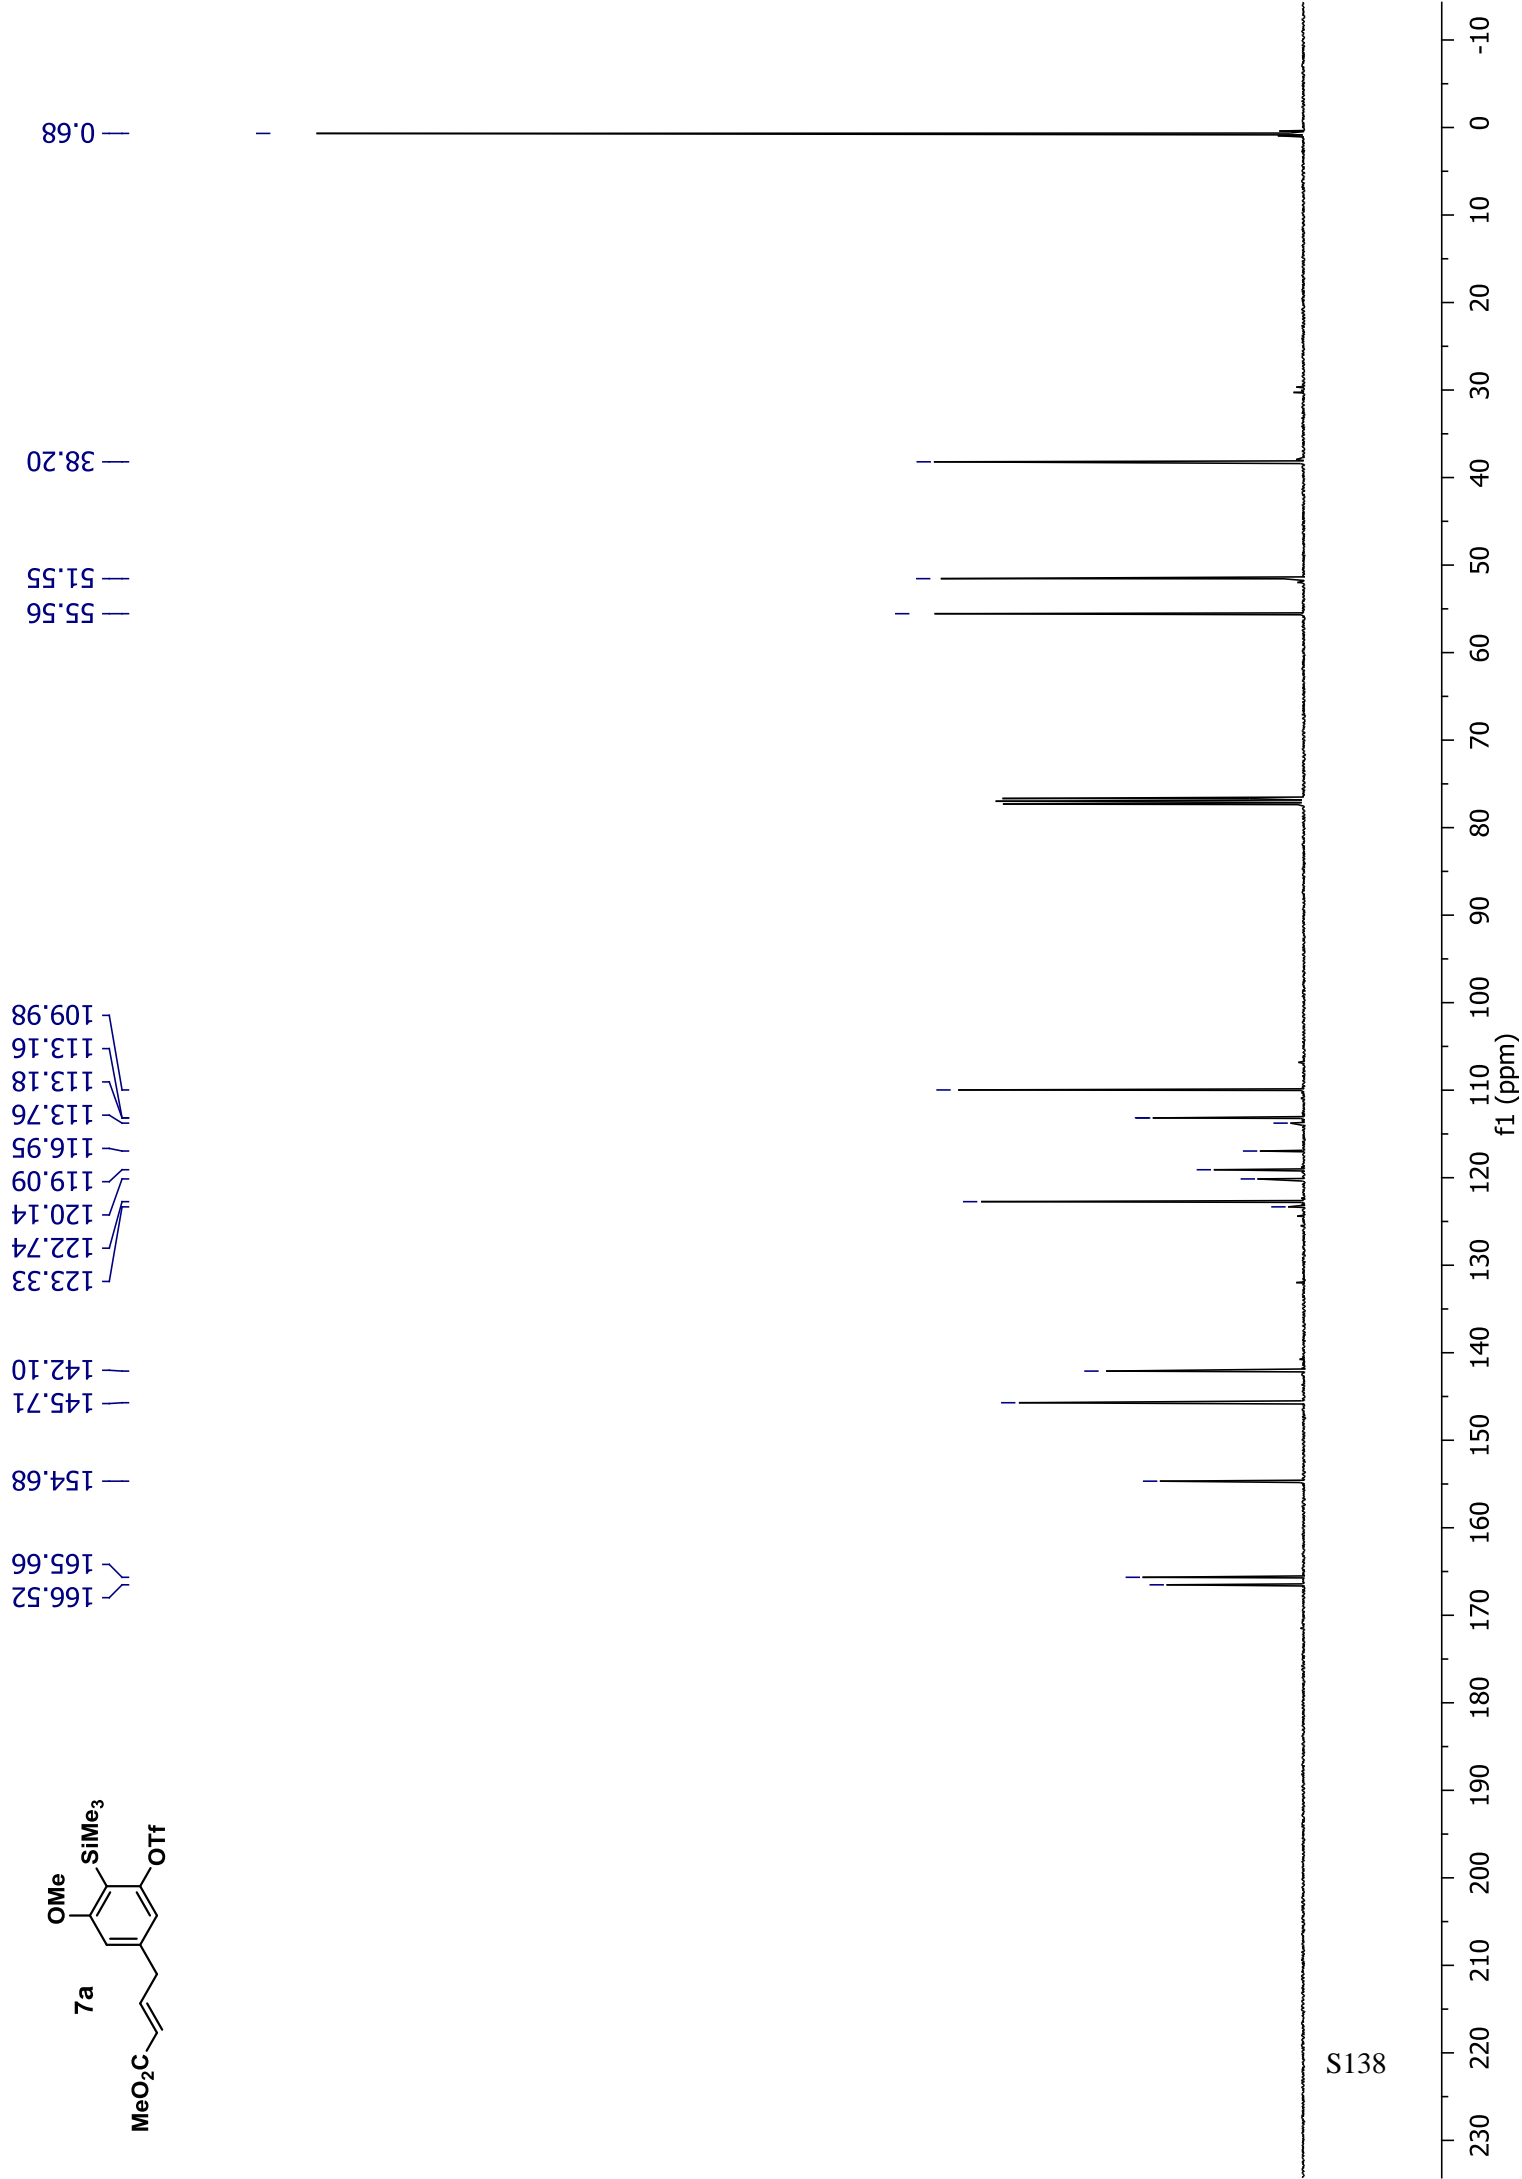



— -72.80

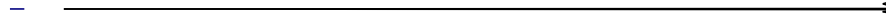

S139

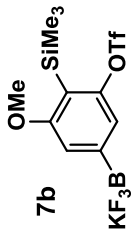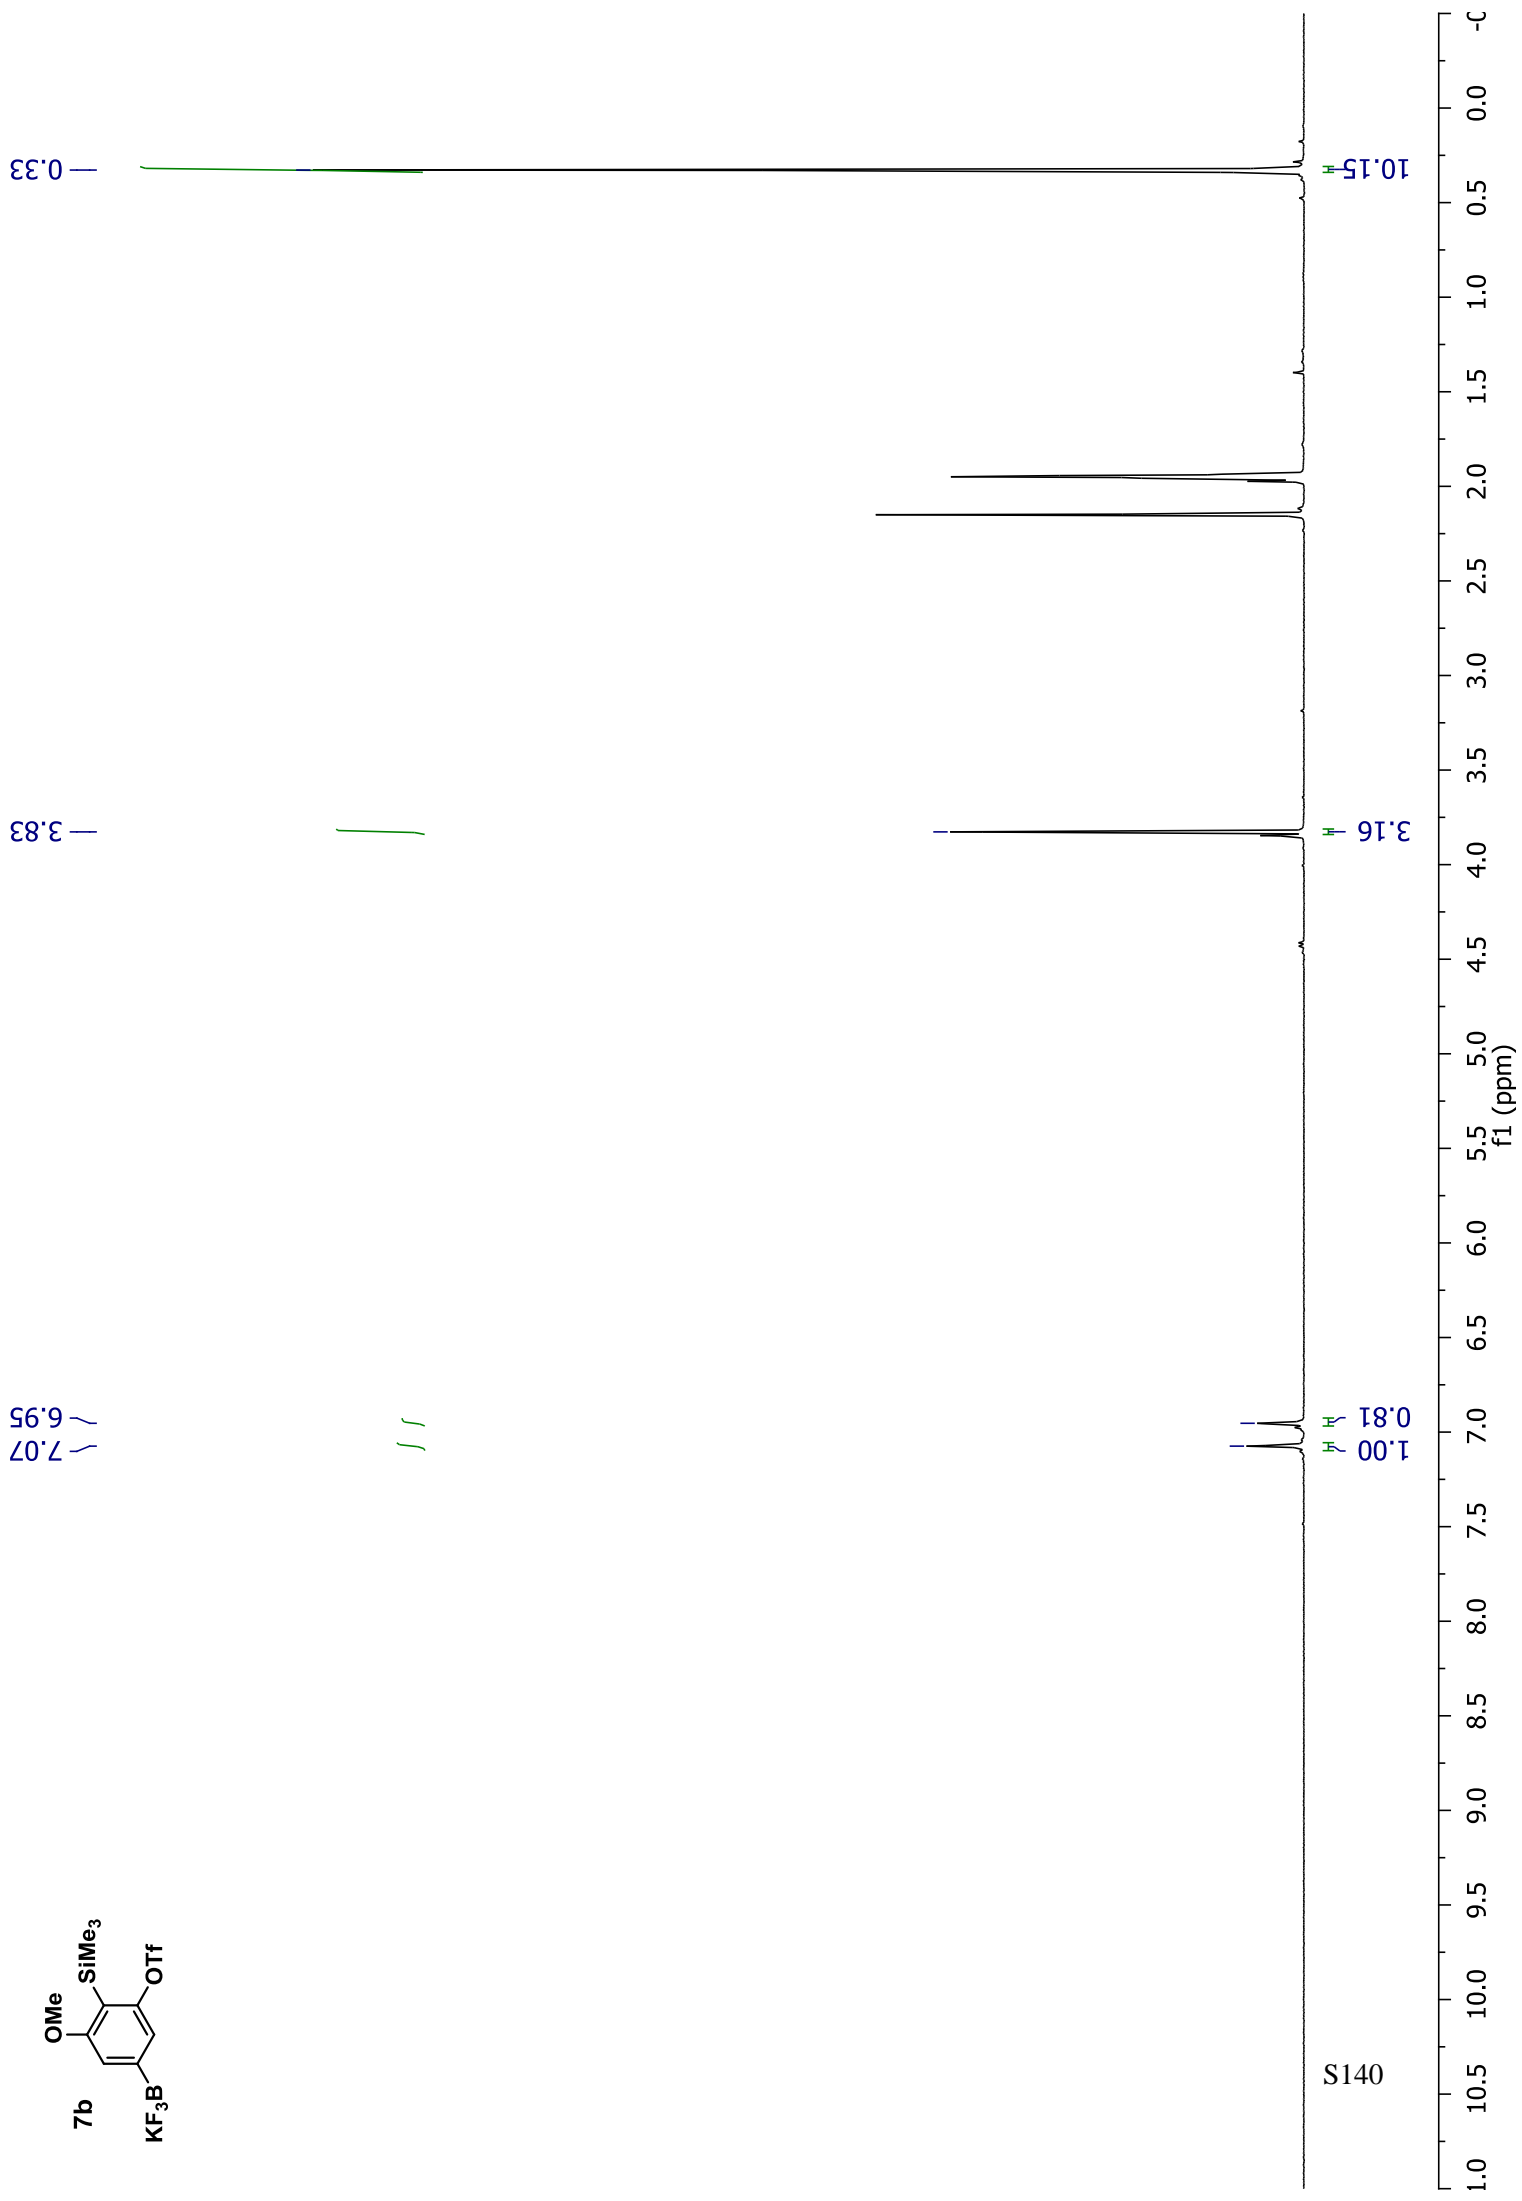

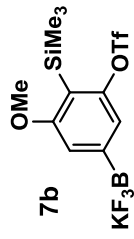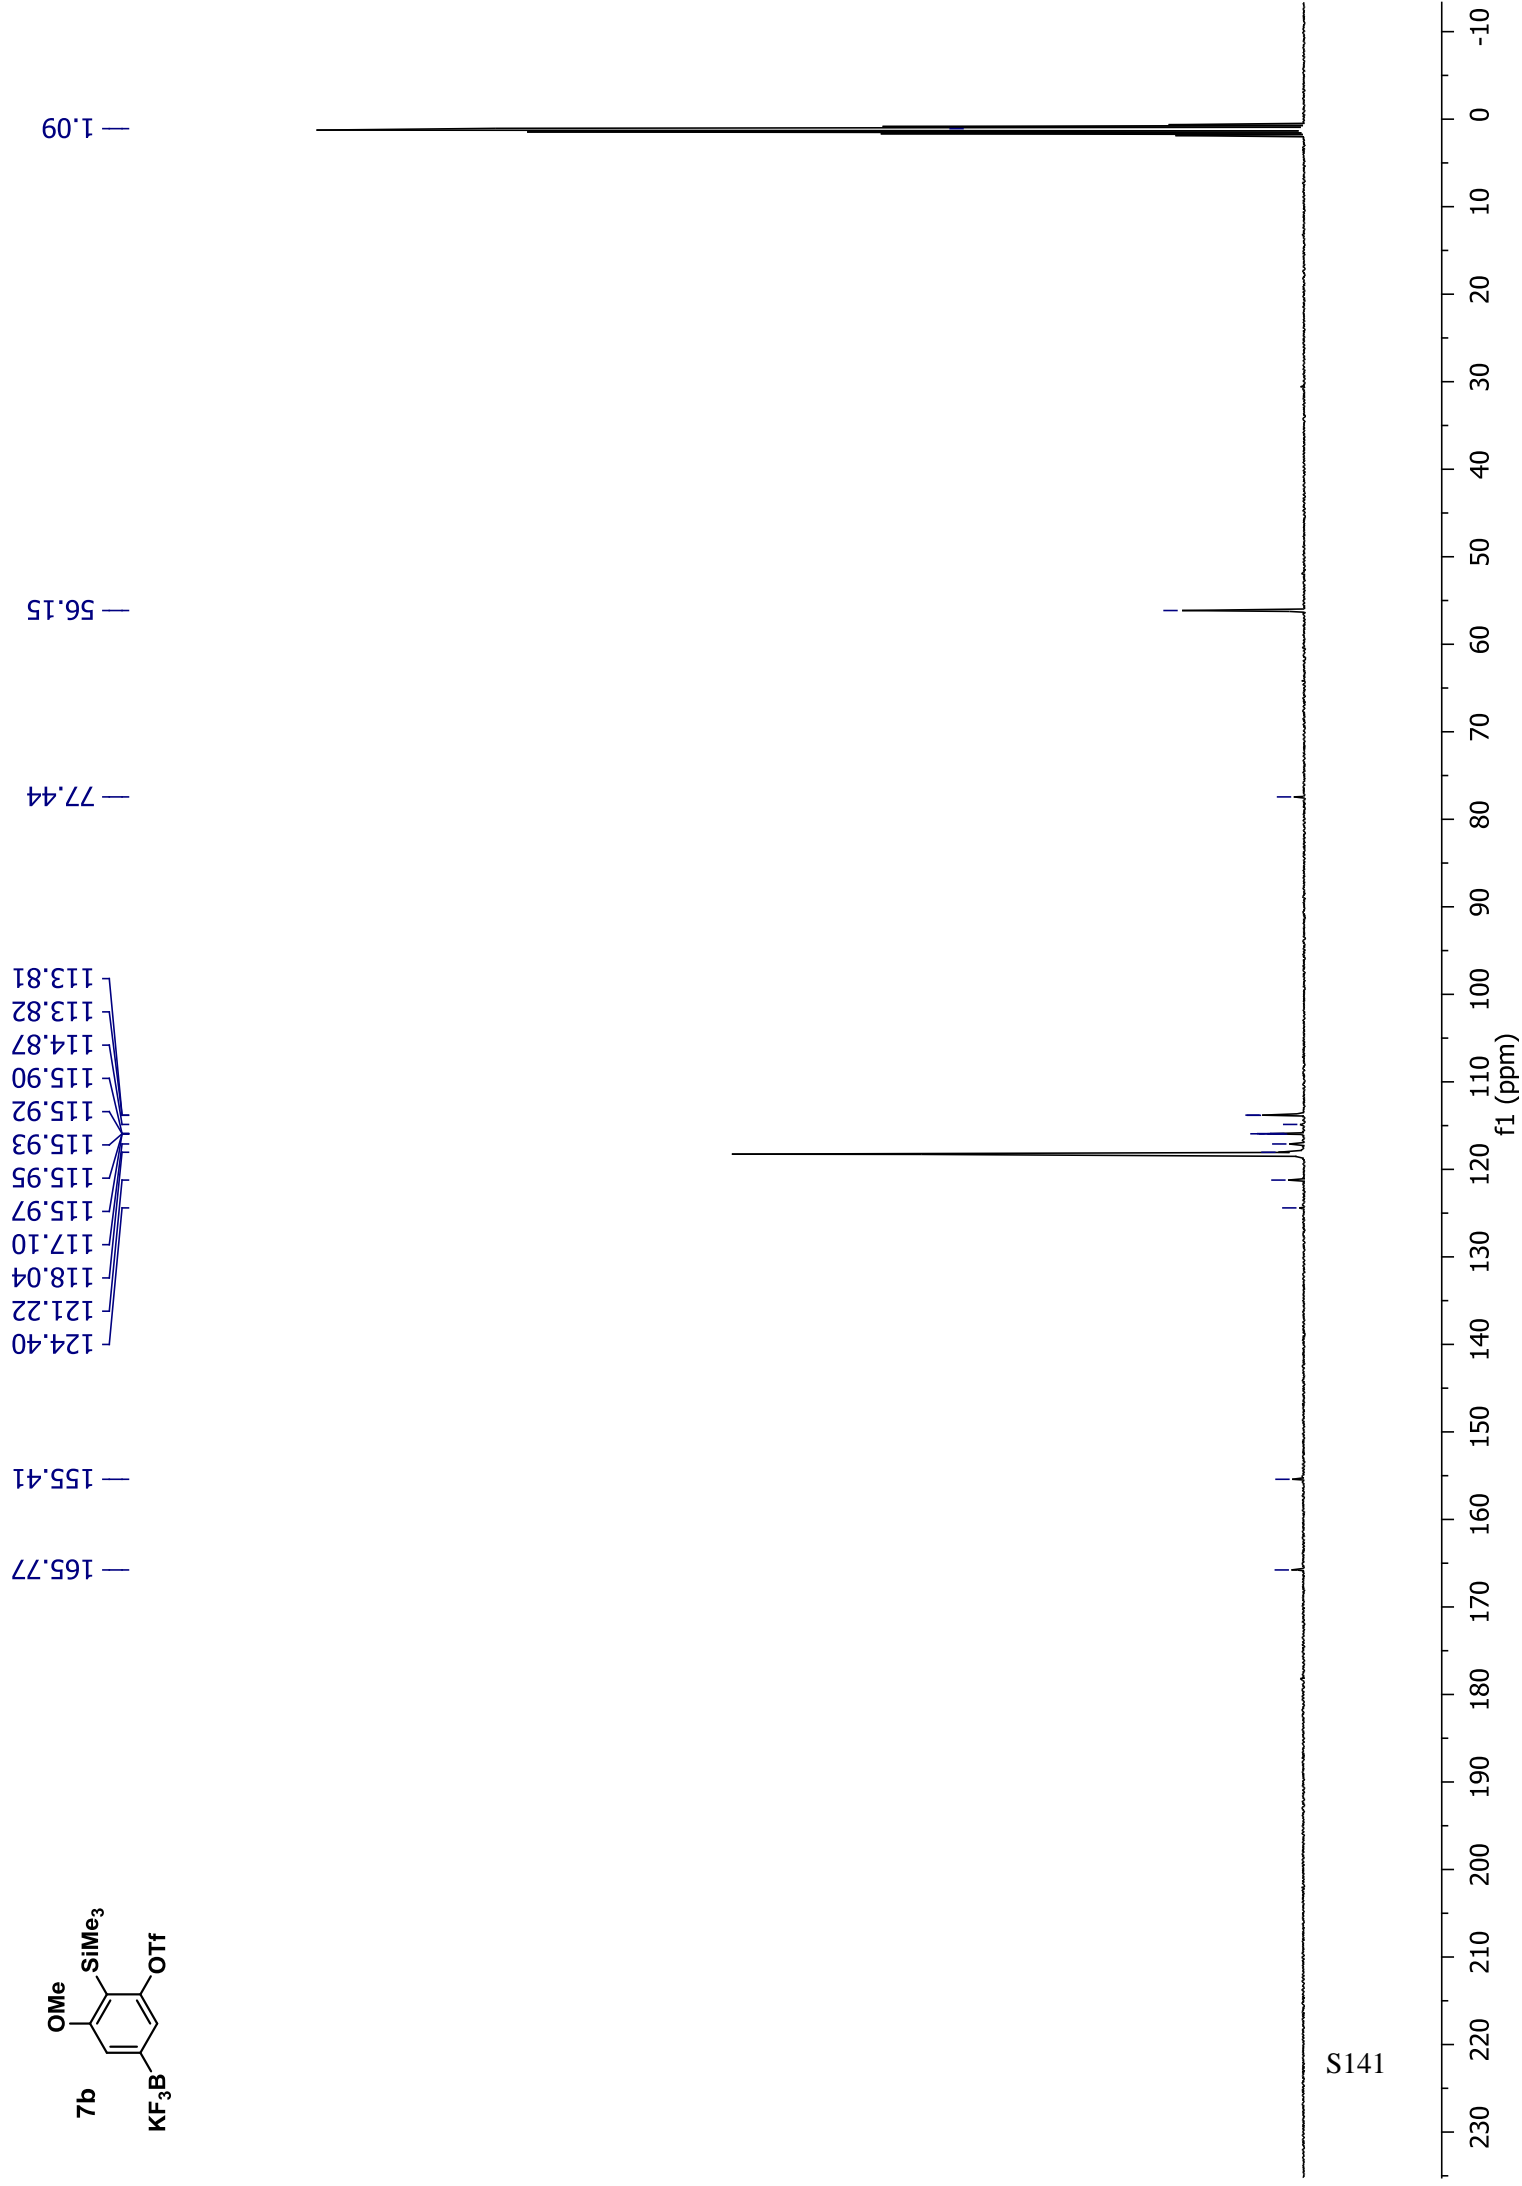

141S

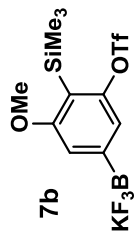

— -143.51

— -73.77

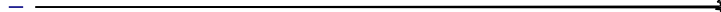

S142

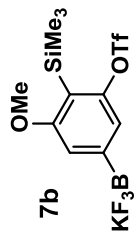

2.79  
2.48

S143

f1 (ppm)

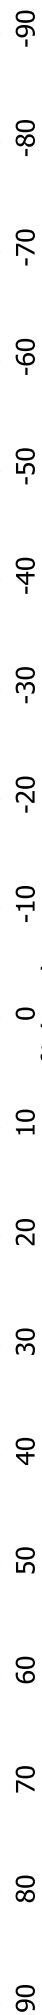



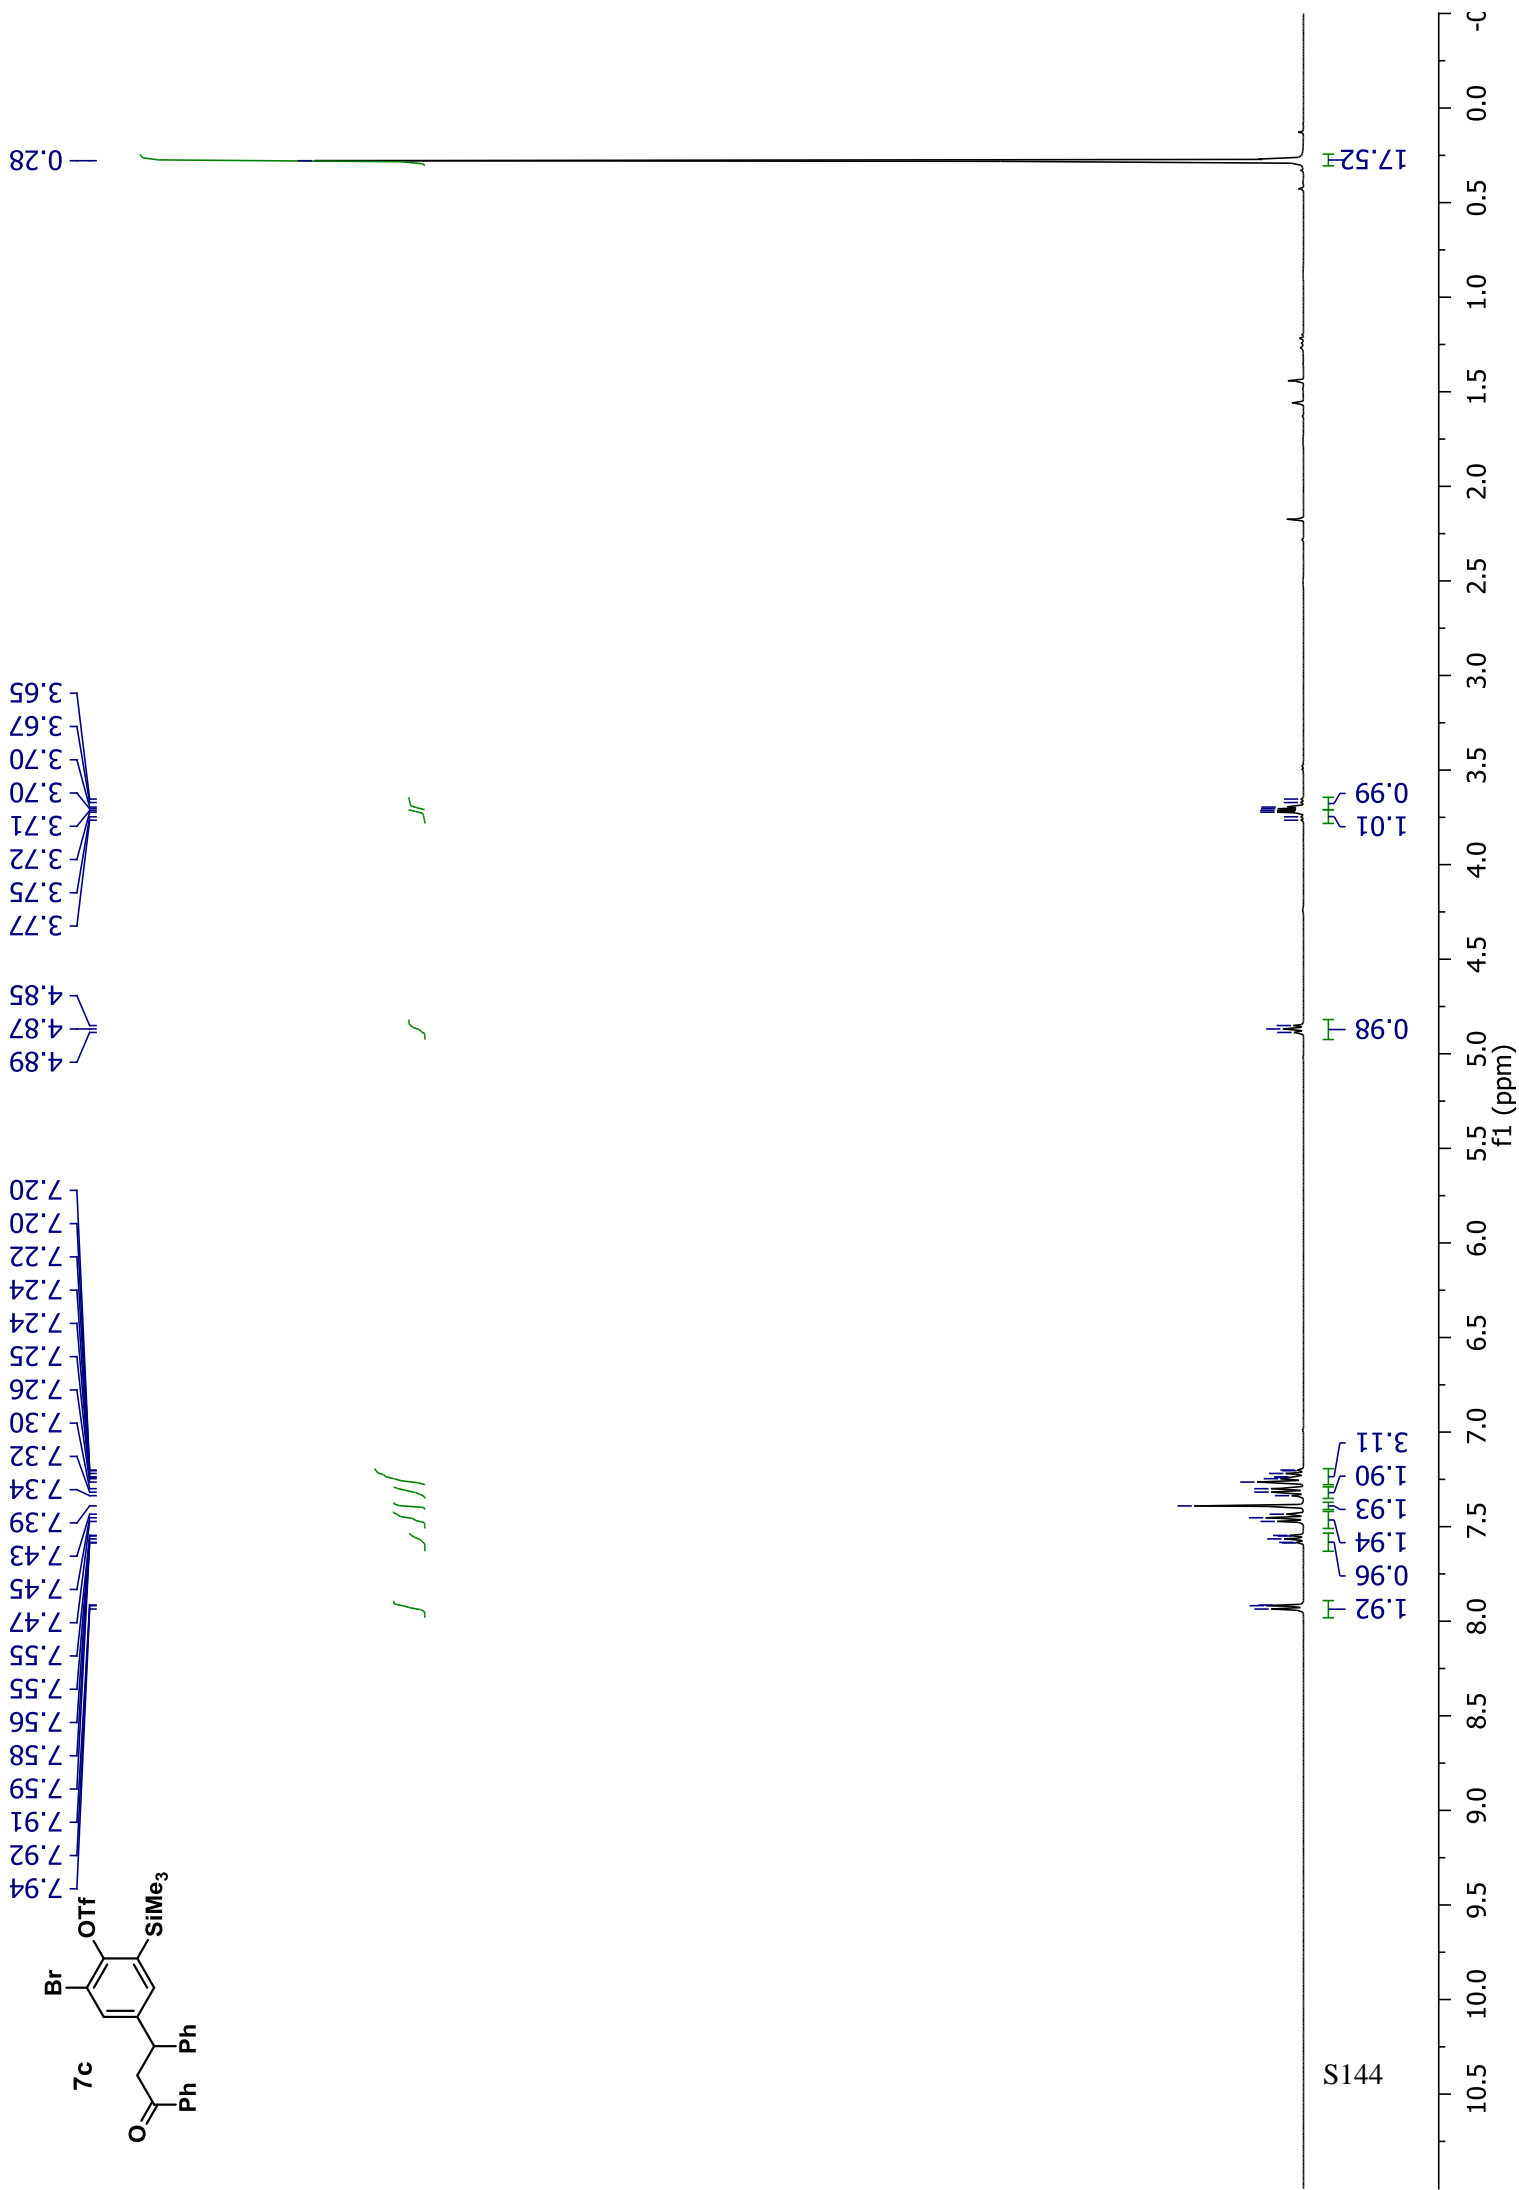

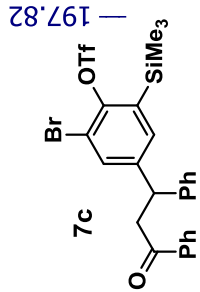

197.82

153.37  
143.16  
142.81  
137.73  
136.93  
134.79  
133.21  
128.68  
128.64  
128.01  
127.73  
126.69  
123.13  
119.95  
116.77  
113.59

45.42  
44.73

0.23

S145



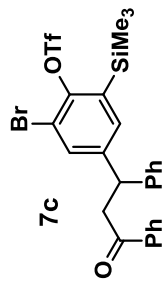

-72.53



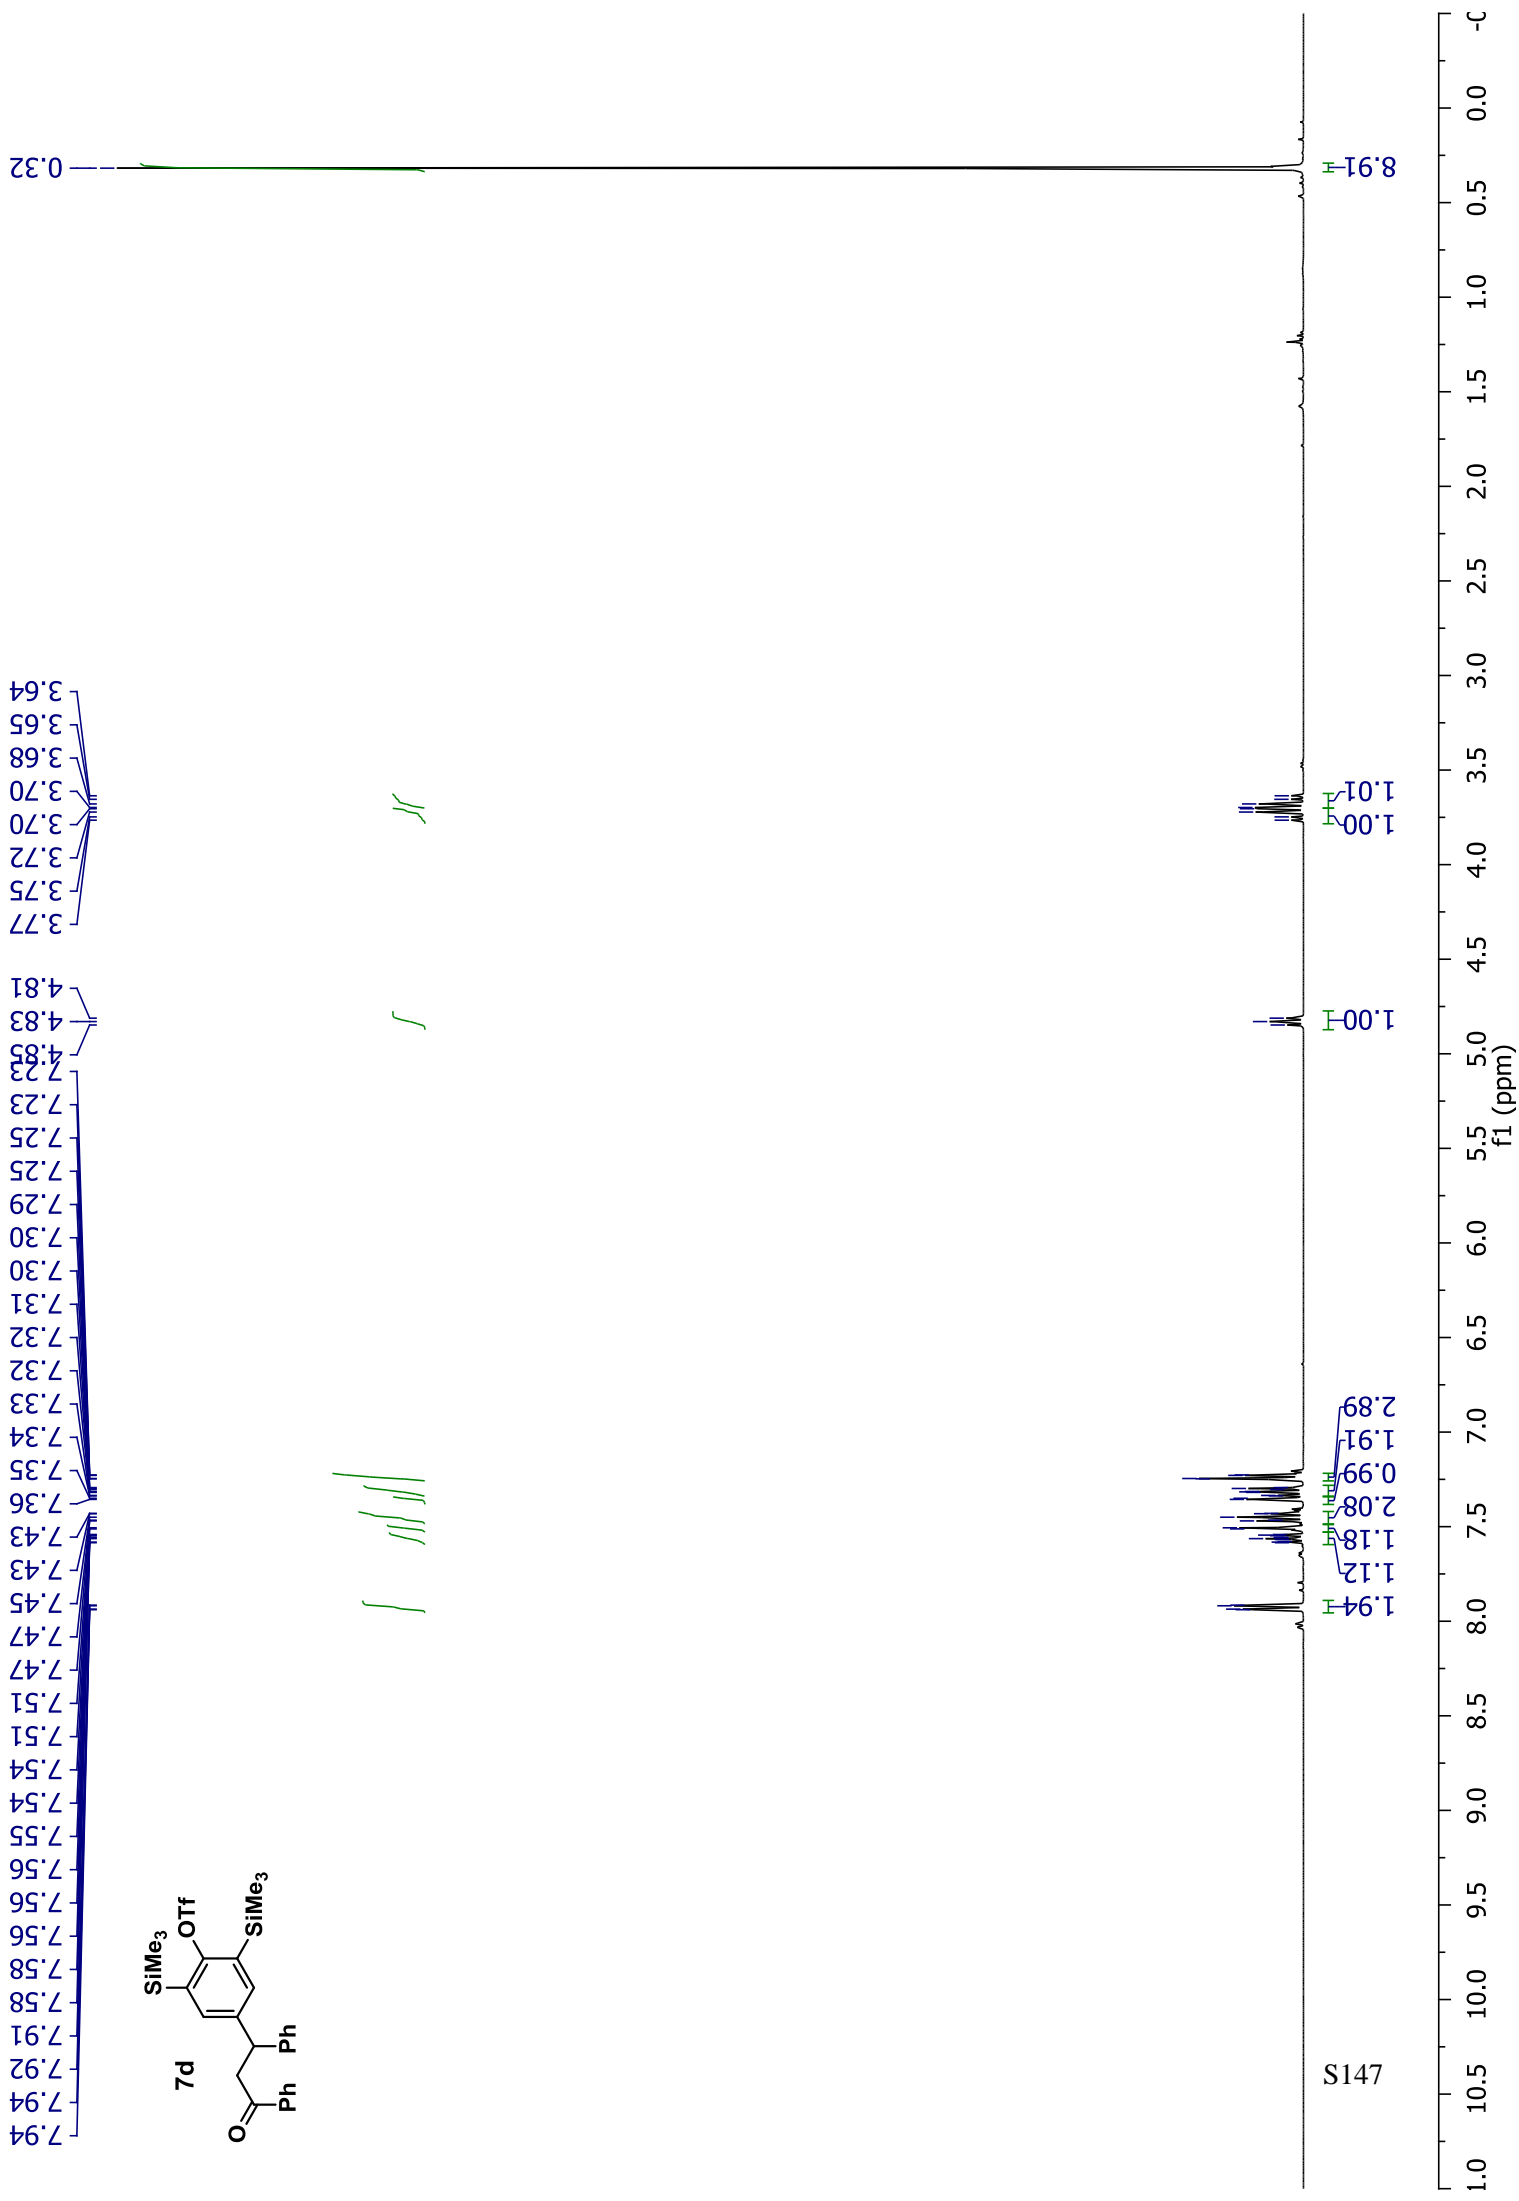

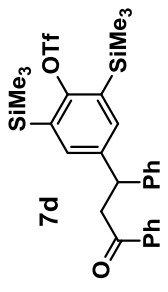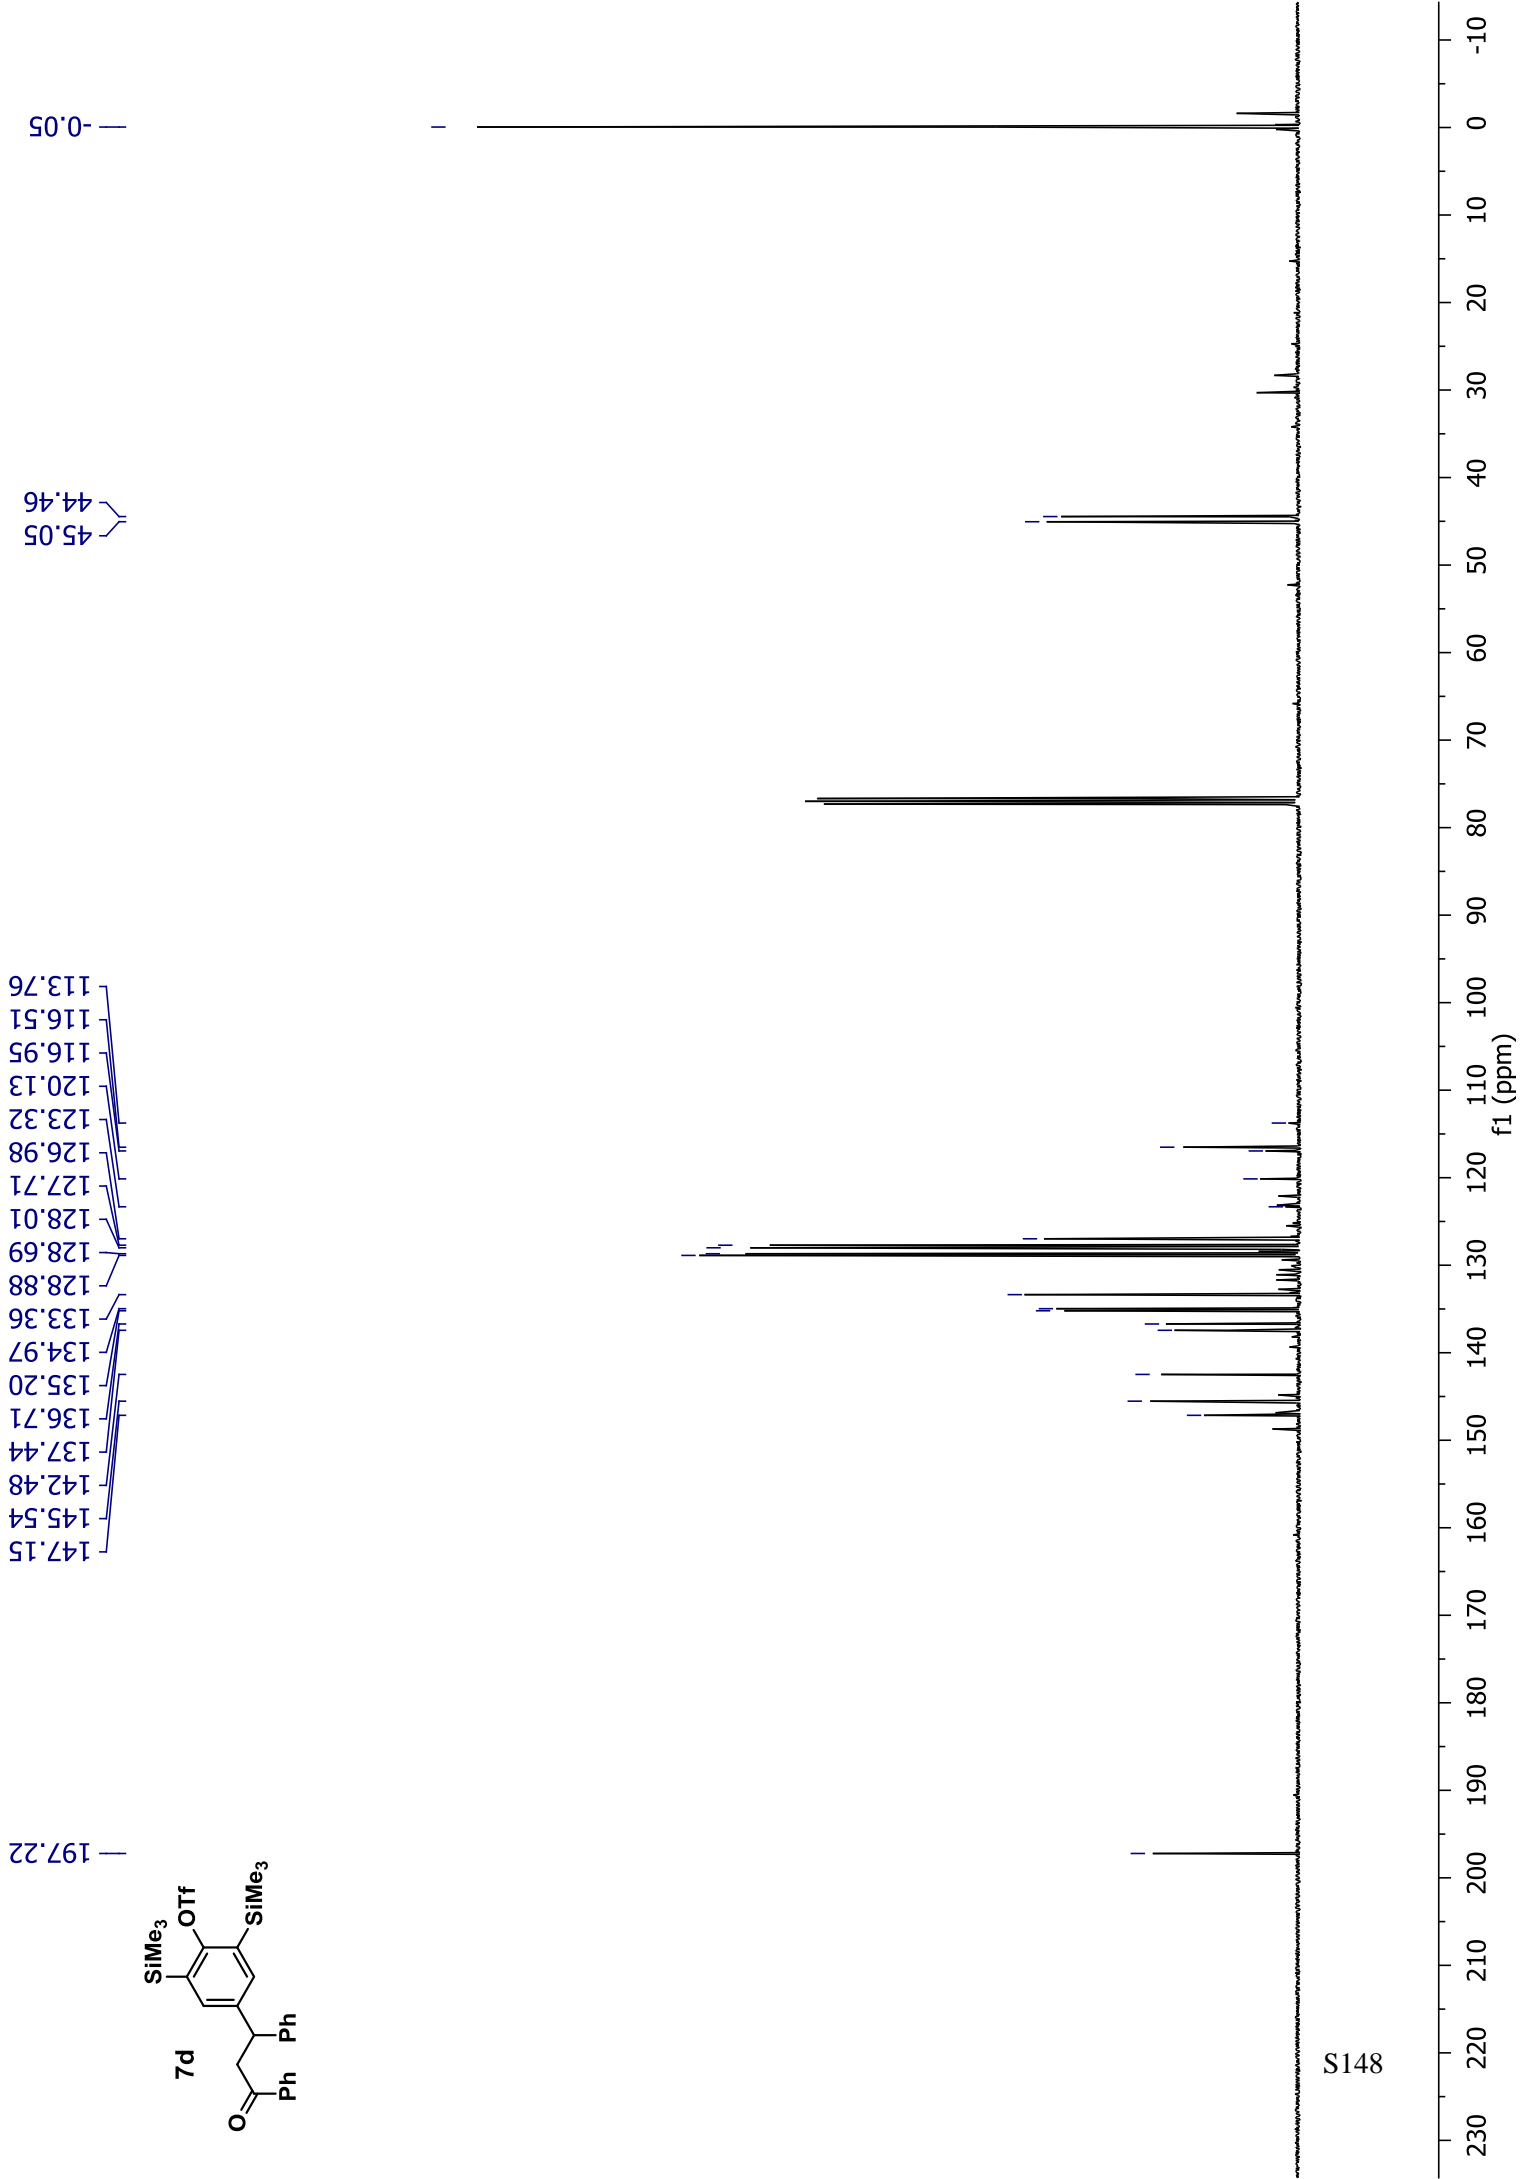

8148

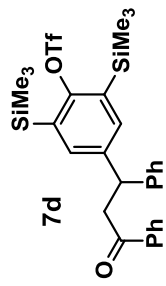

-71.76

-

S149

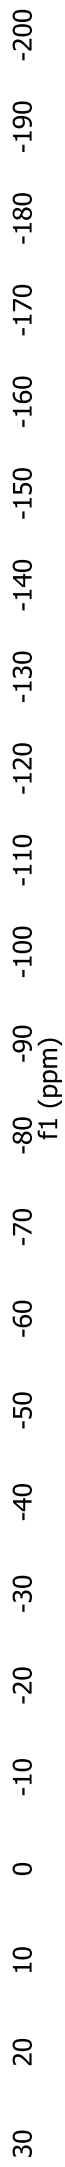

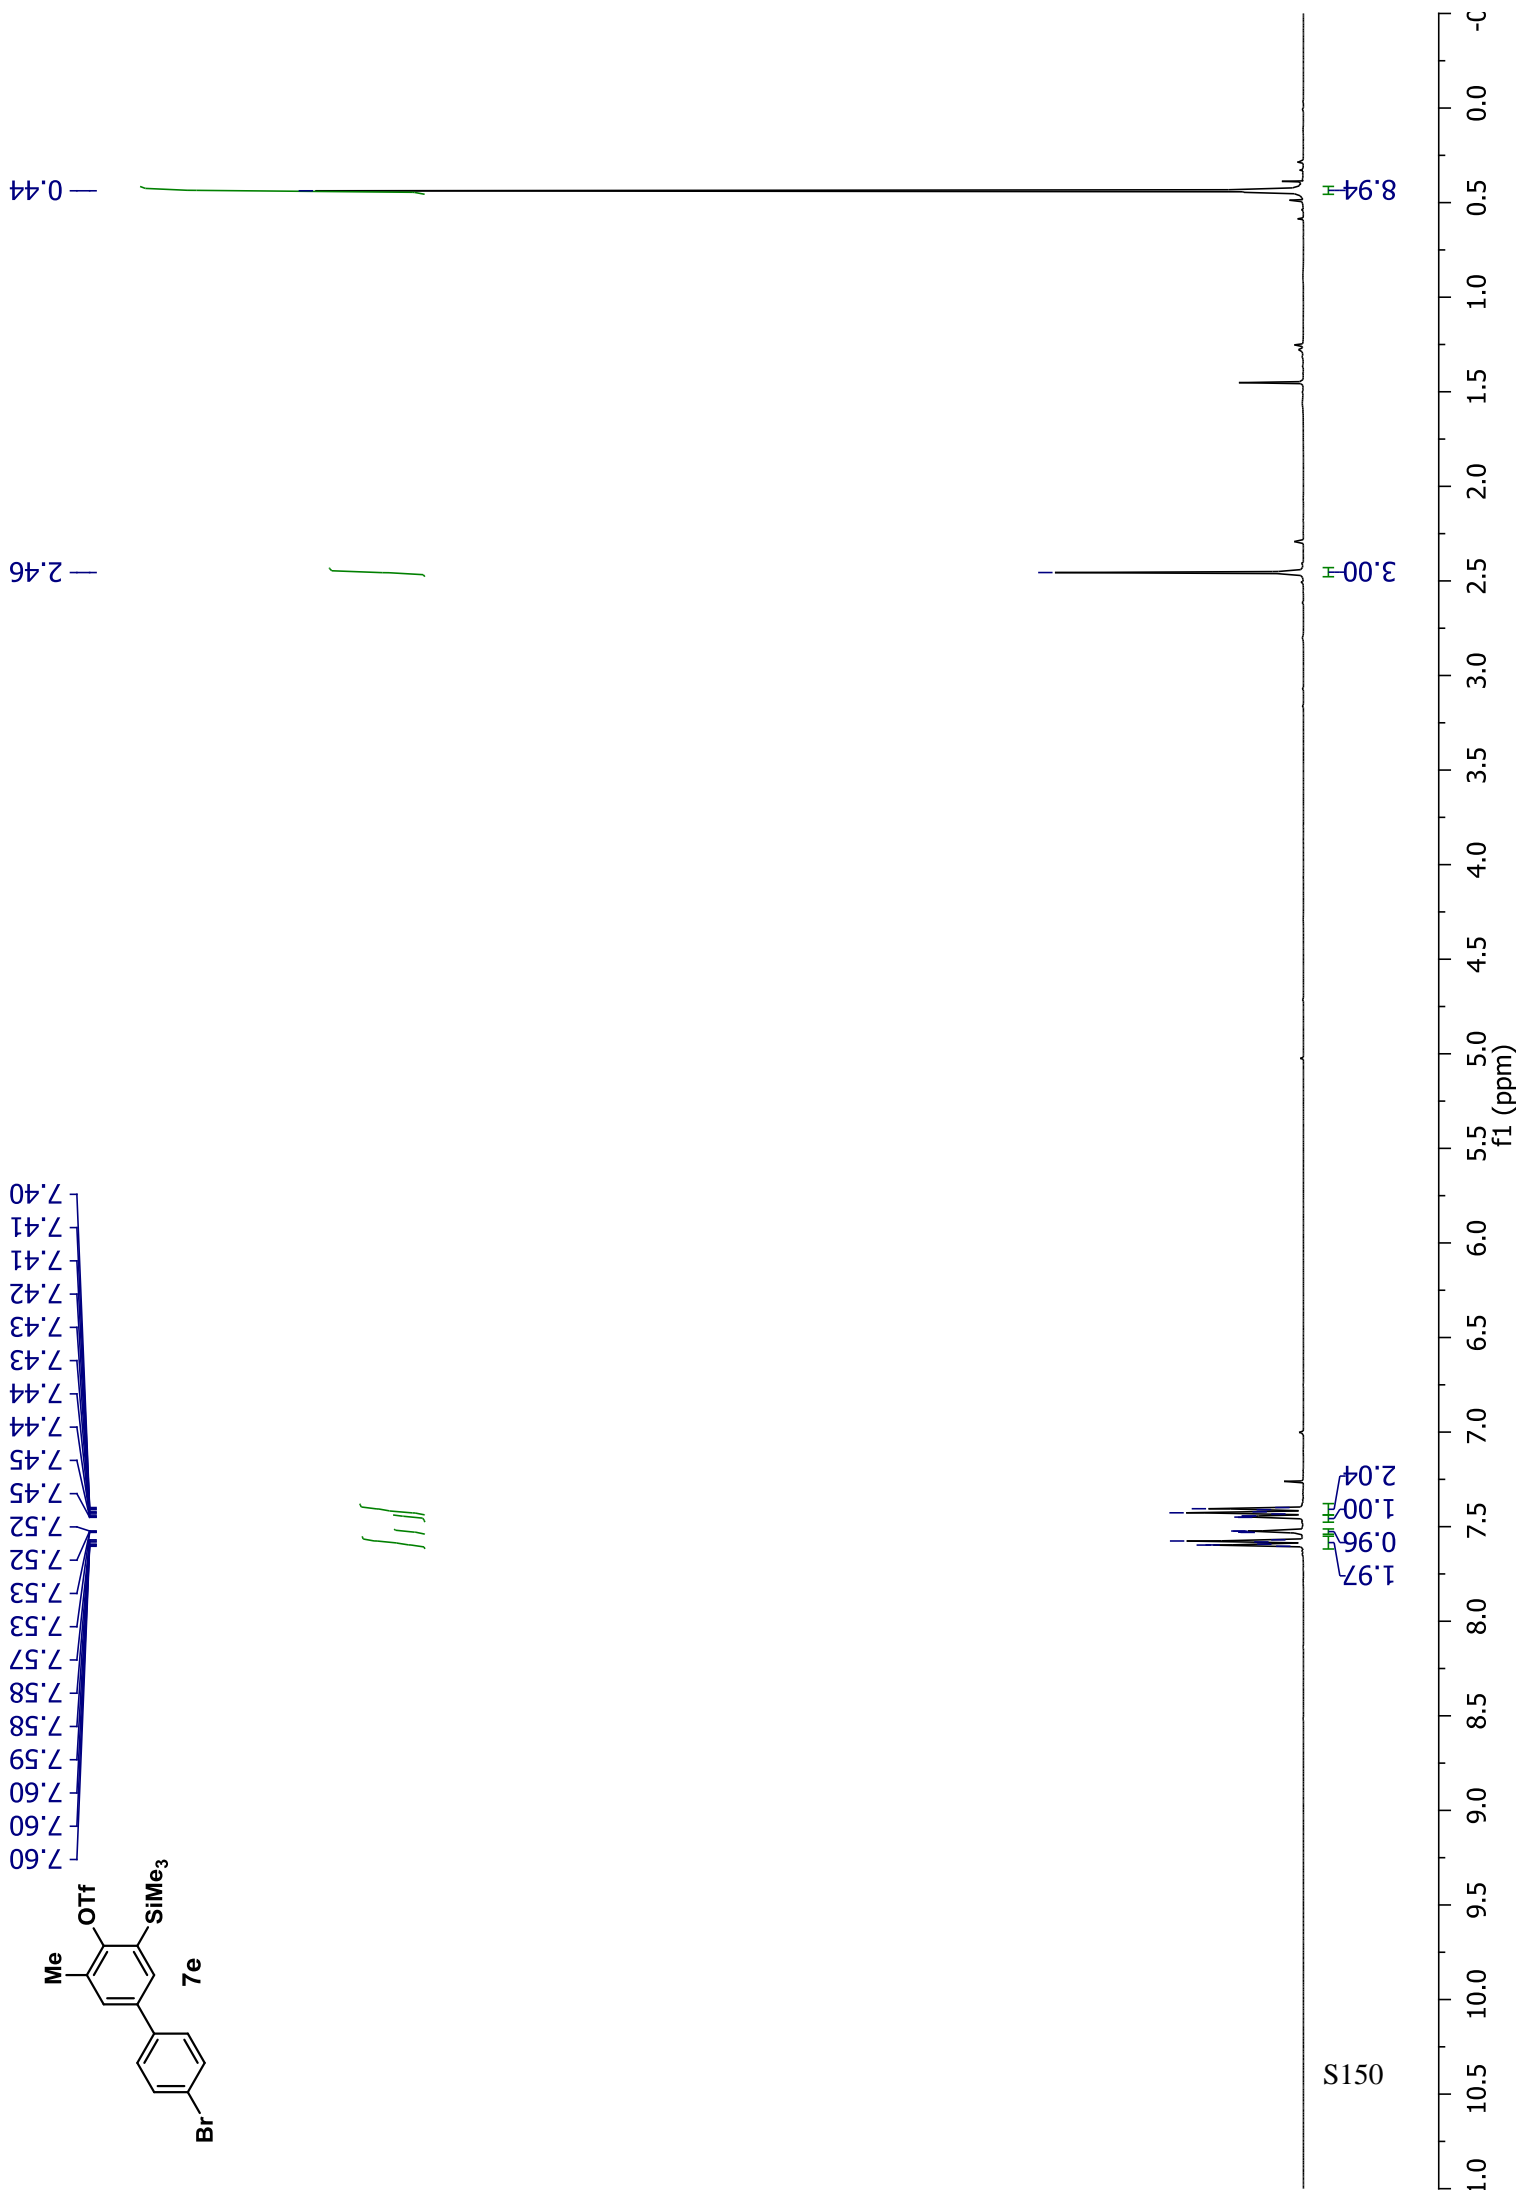

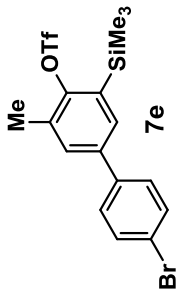

150.67  
139.71  
138.68  
135.48  
132.94  
132.18  
131.98  
131.84  
128.81  
123.39  
122.16  
120.21  
117.03  
113.85

17.45  
17.43

0.08

151

f1 (ppm)

230 220 210 200 190 180 170 160 150 140 130 120 110 100 90 80 70 60 50 40 30 20 10 0 -10

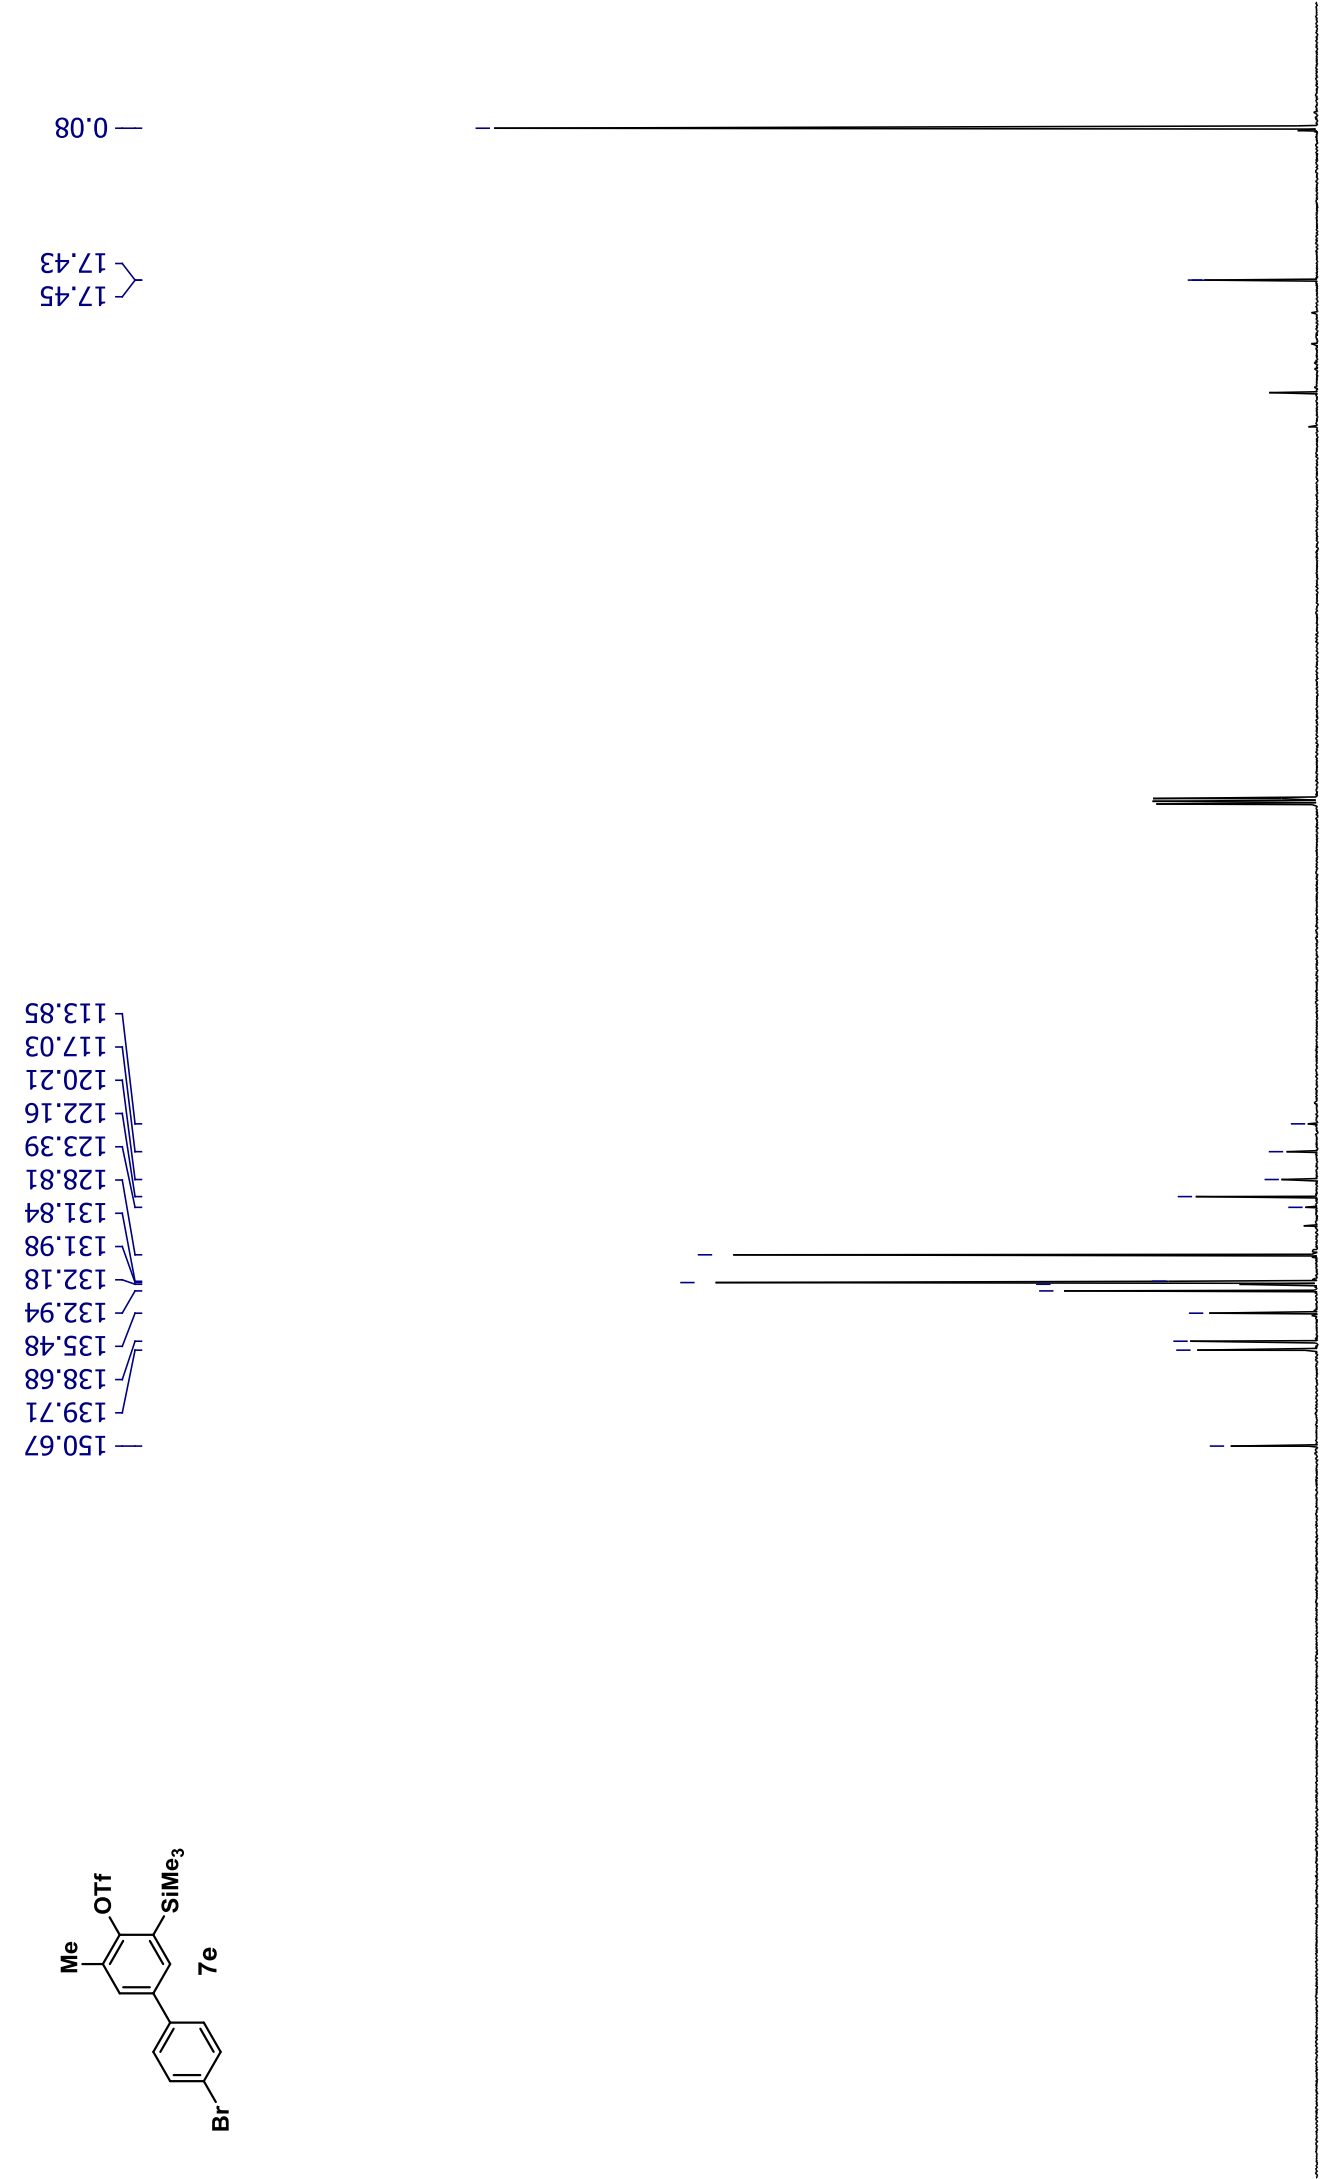



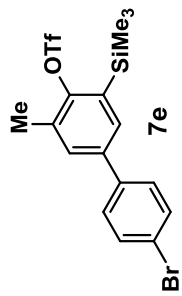

-73.30

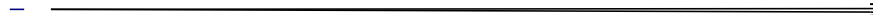

S152

30 20 10 0 10 20 30 40 50 60 70 80 90 100 110 120 130 140 150 160 170 180 190 200

f1 (ppm)

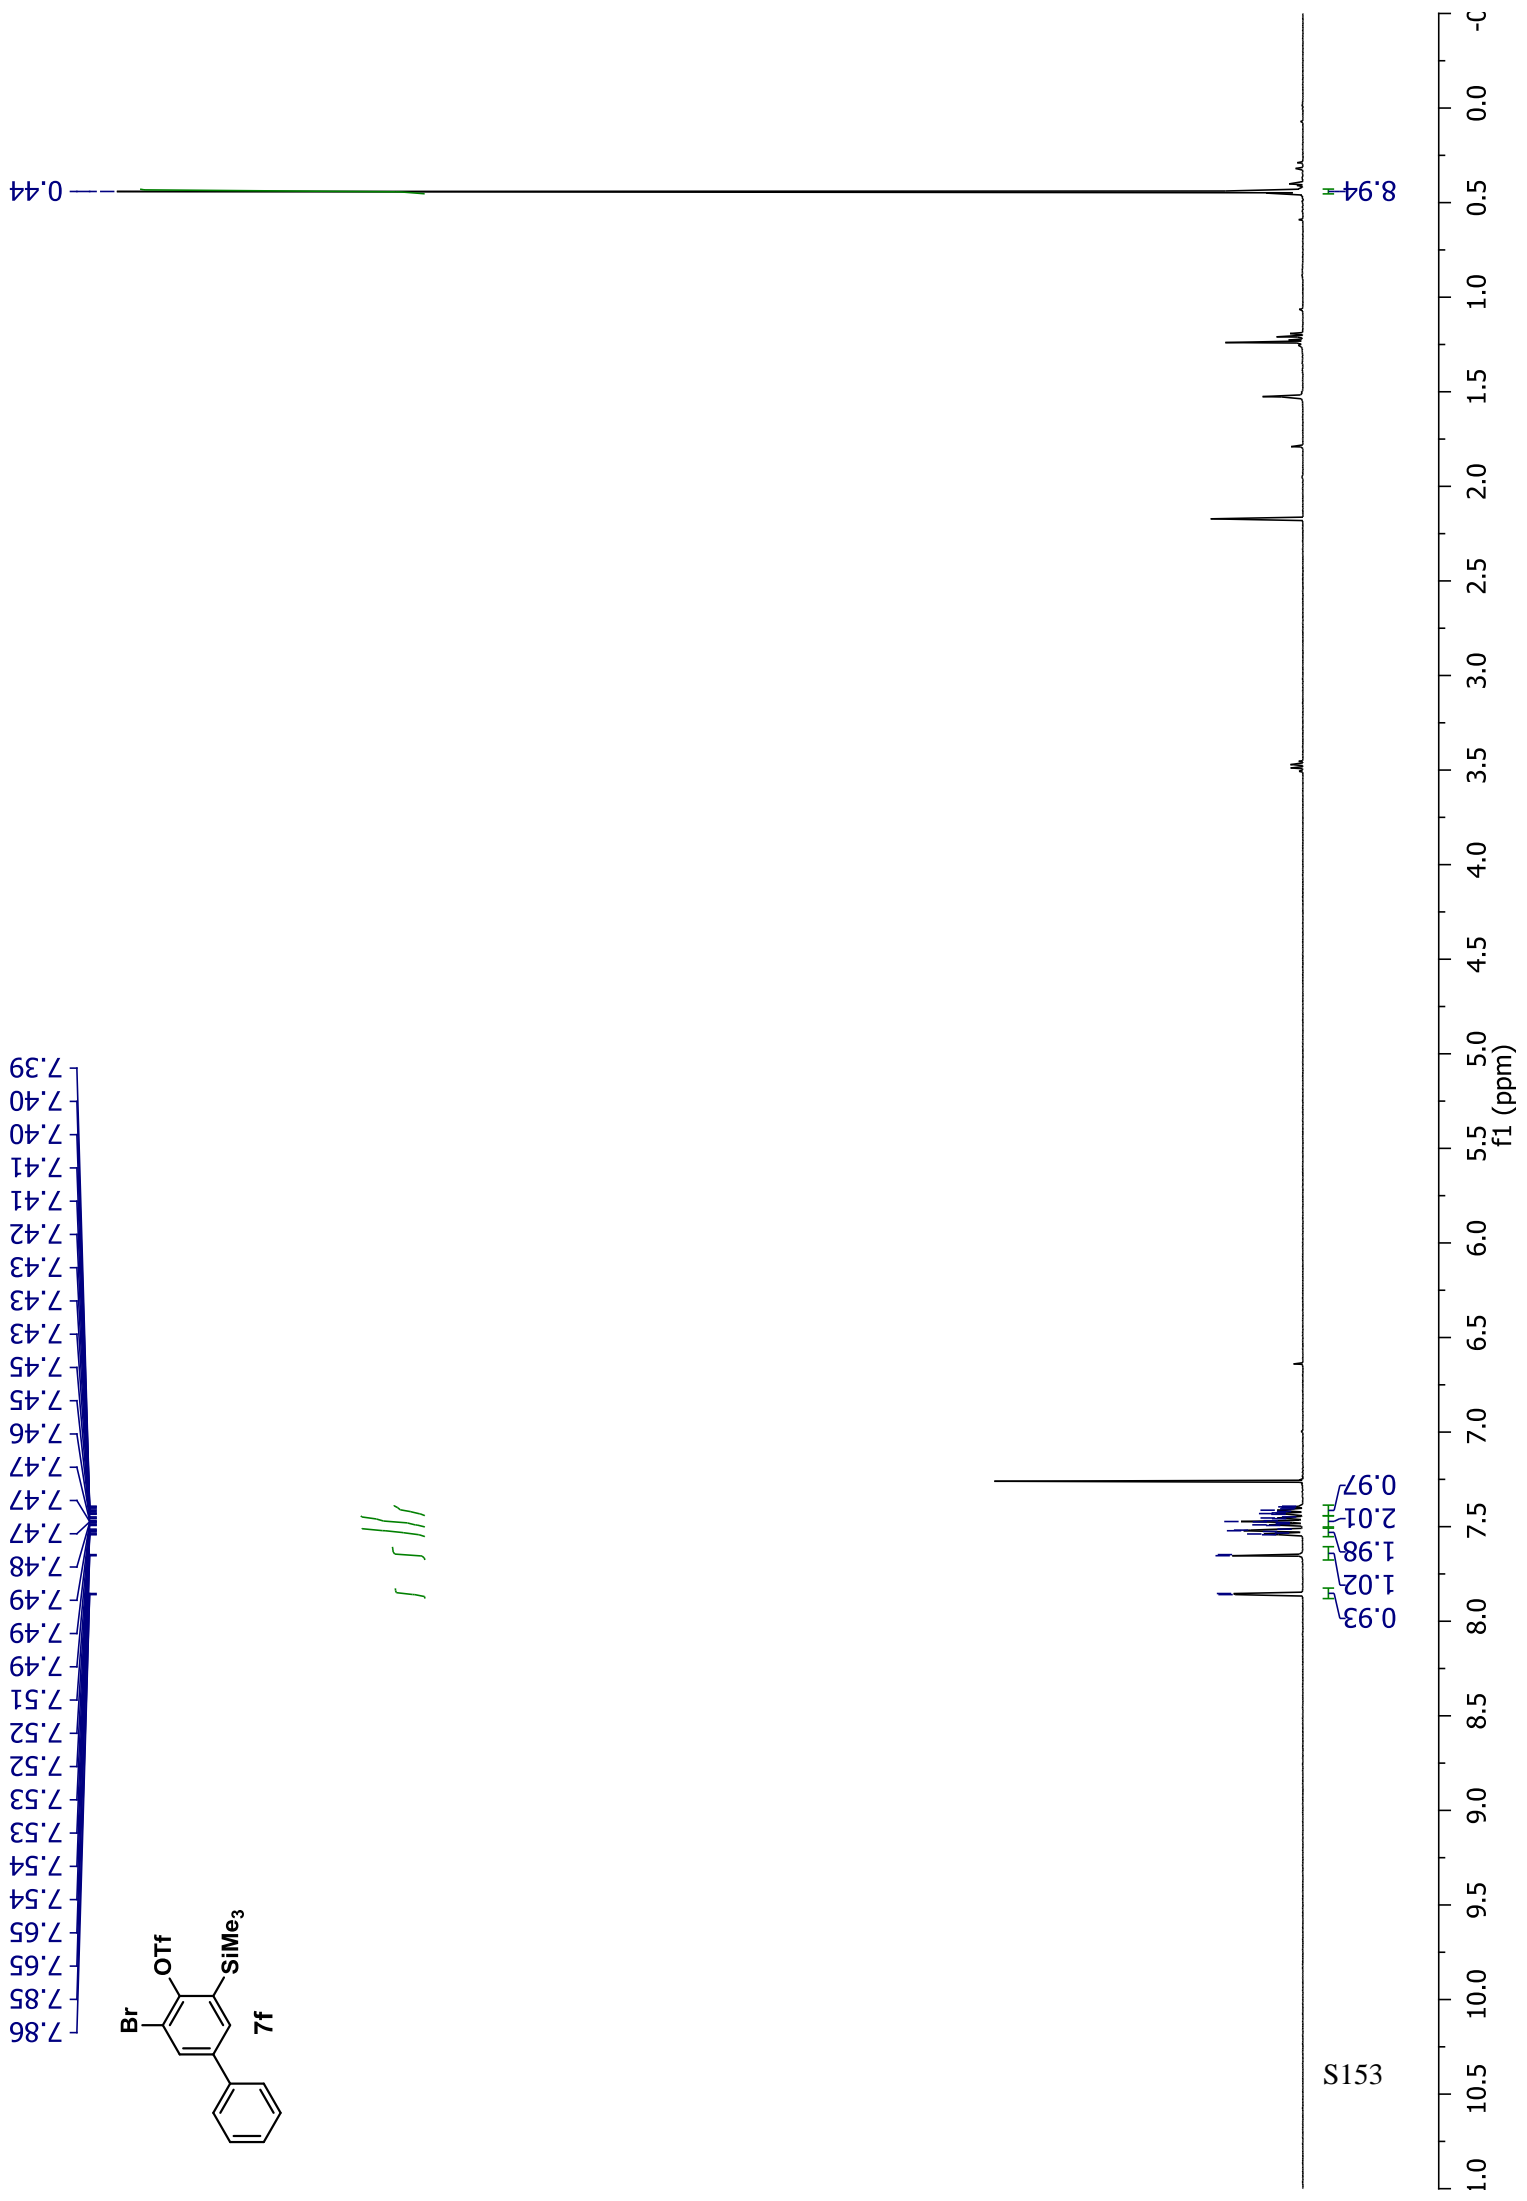

0.44

8.94

7.39  
7.40  
7.40  
7.41  
7.41  
7.42  
7.43  
7.43  
7.43  
7.43  
7.45  
7.45  
7.46  
7.47  
7.47  
7.47  
7.48  
7.49  
7.49  
7.49  
7.49  
7.51  
7.52  
7.52  
7.53  
7.53  
7.54  
7.54  
7.65  
7.65  
7.85  
7.86

0.97  
2.01  
1.98  
1.02  
0.93

1.97

CS1S

f1 (ppm)

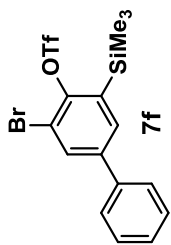

148.02  
142.33  
138.38  
137.83  
134.23  
129.02  
128.37  
127.23  
123.39  
120.20  
117.01  
116.72  
113.81

0.07

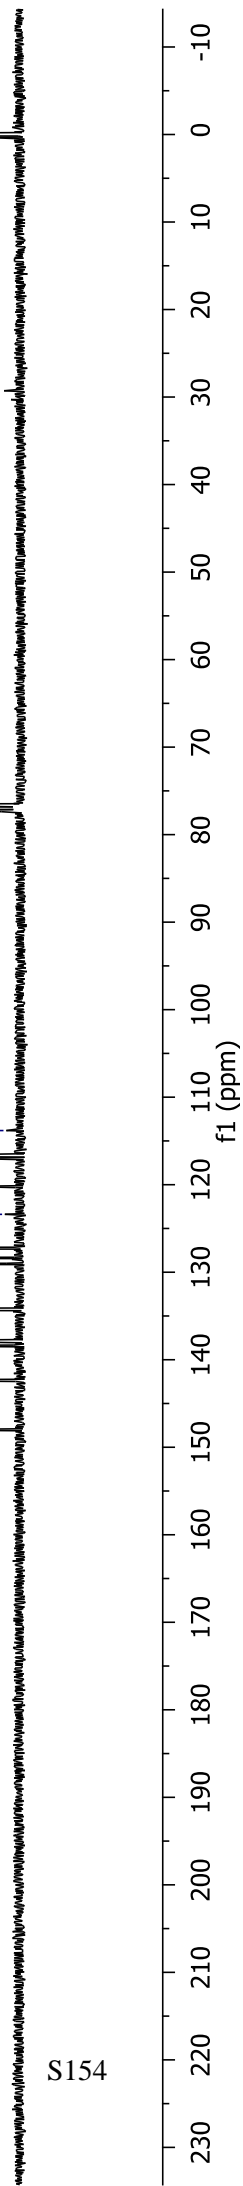

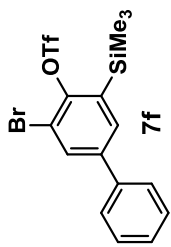

-71.62

S155

f1 (ppm)

30 20 10 0 -10 -20 -30 -40 -50 -60 -70 -80 -90 -100 -110 -120 -130 -140 -150 -160 -170 -180 -190 -200

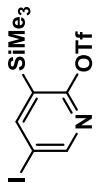

7g

8.51  
8.51  
8.12  
8.11

0.37

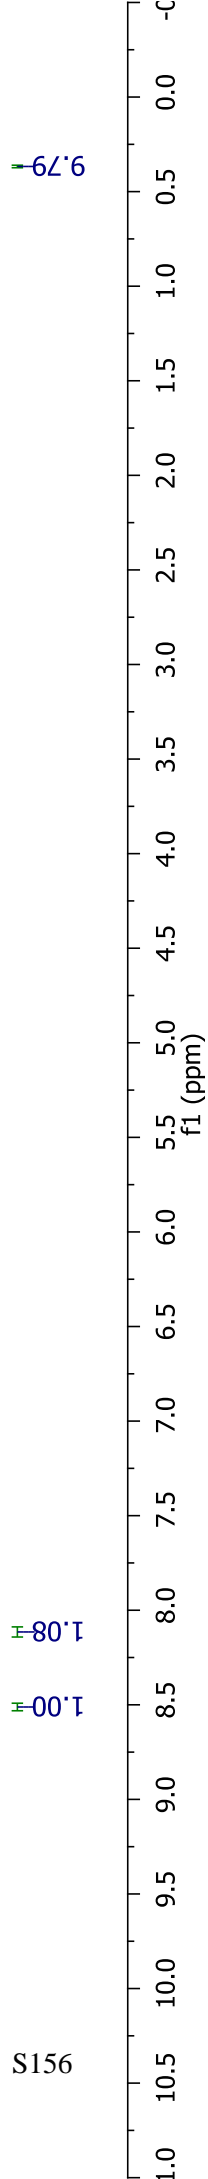

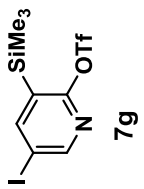

160.04  
154.52  
154.46

128.71  
123.20  
120.01  
116.82  
113.63

92.00

-1.74

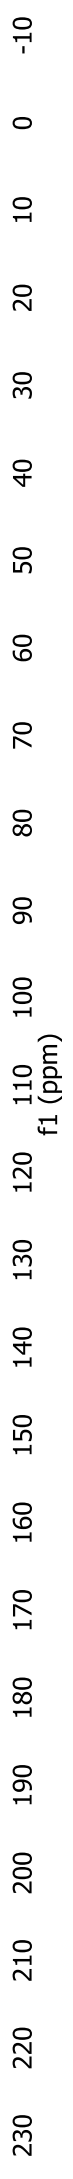

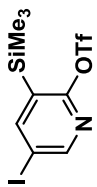

7g

-72.62

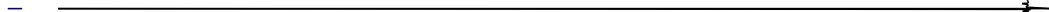

S158

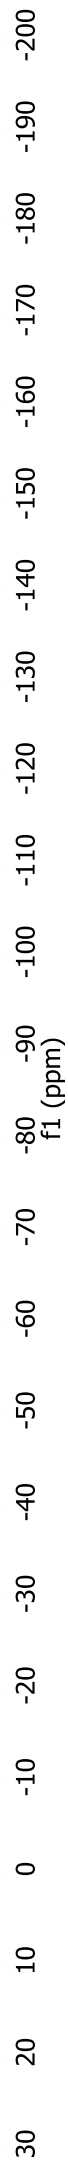

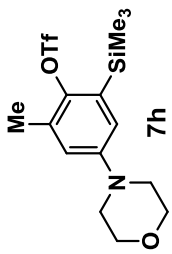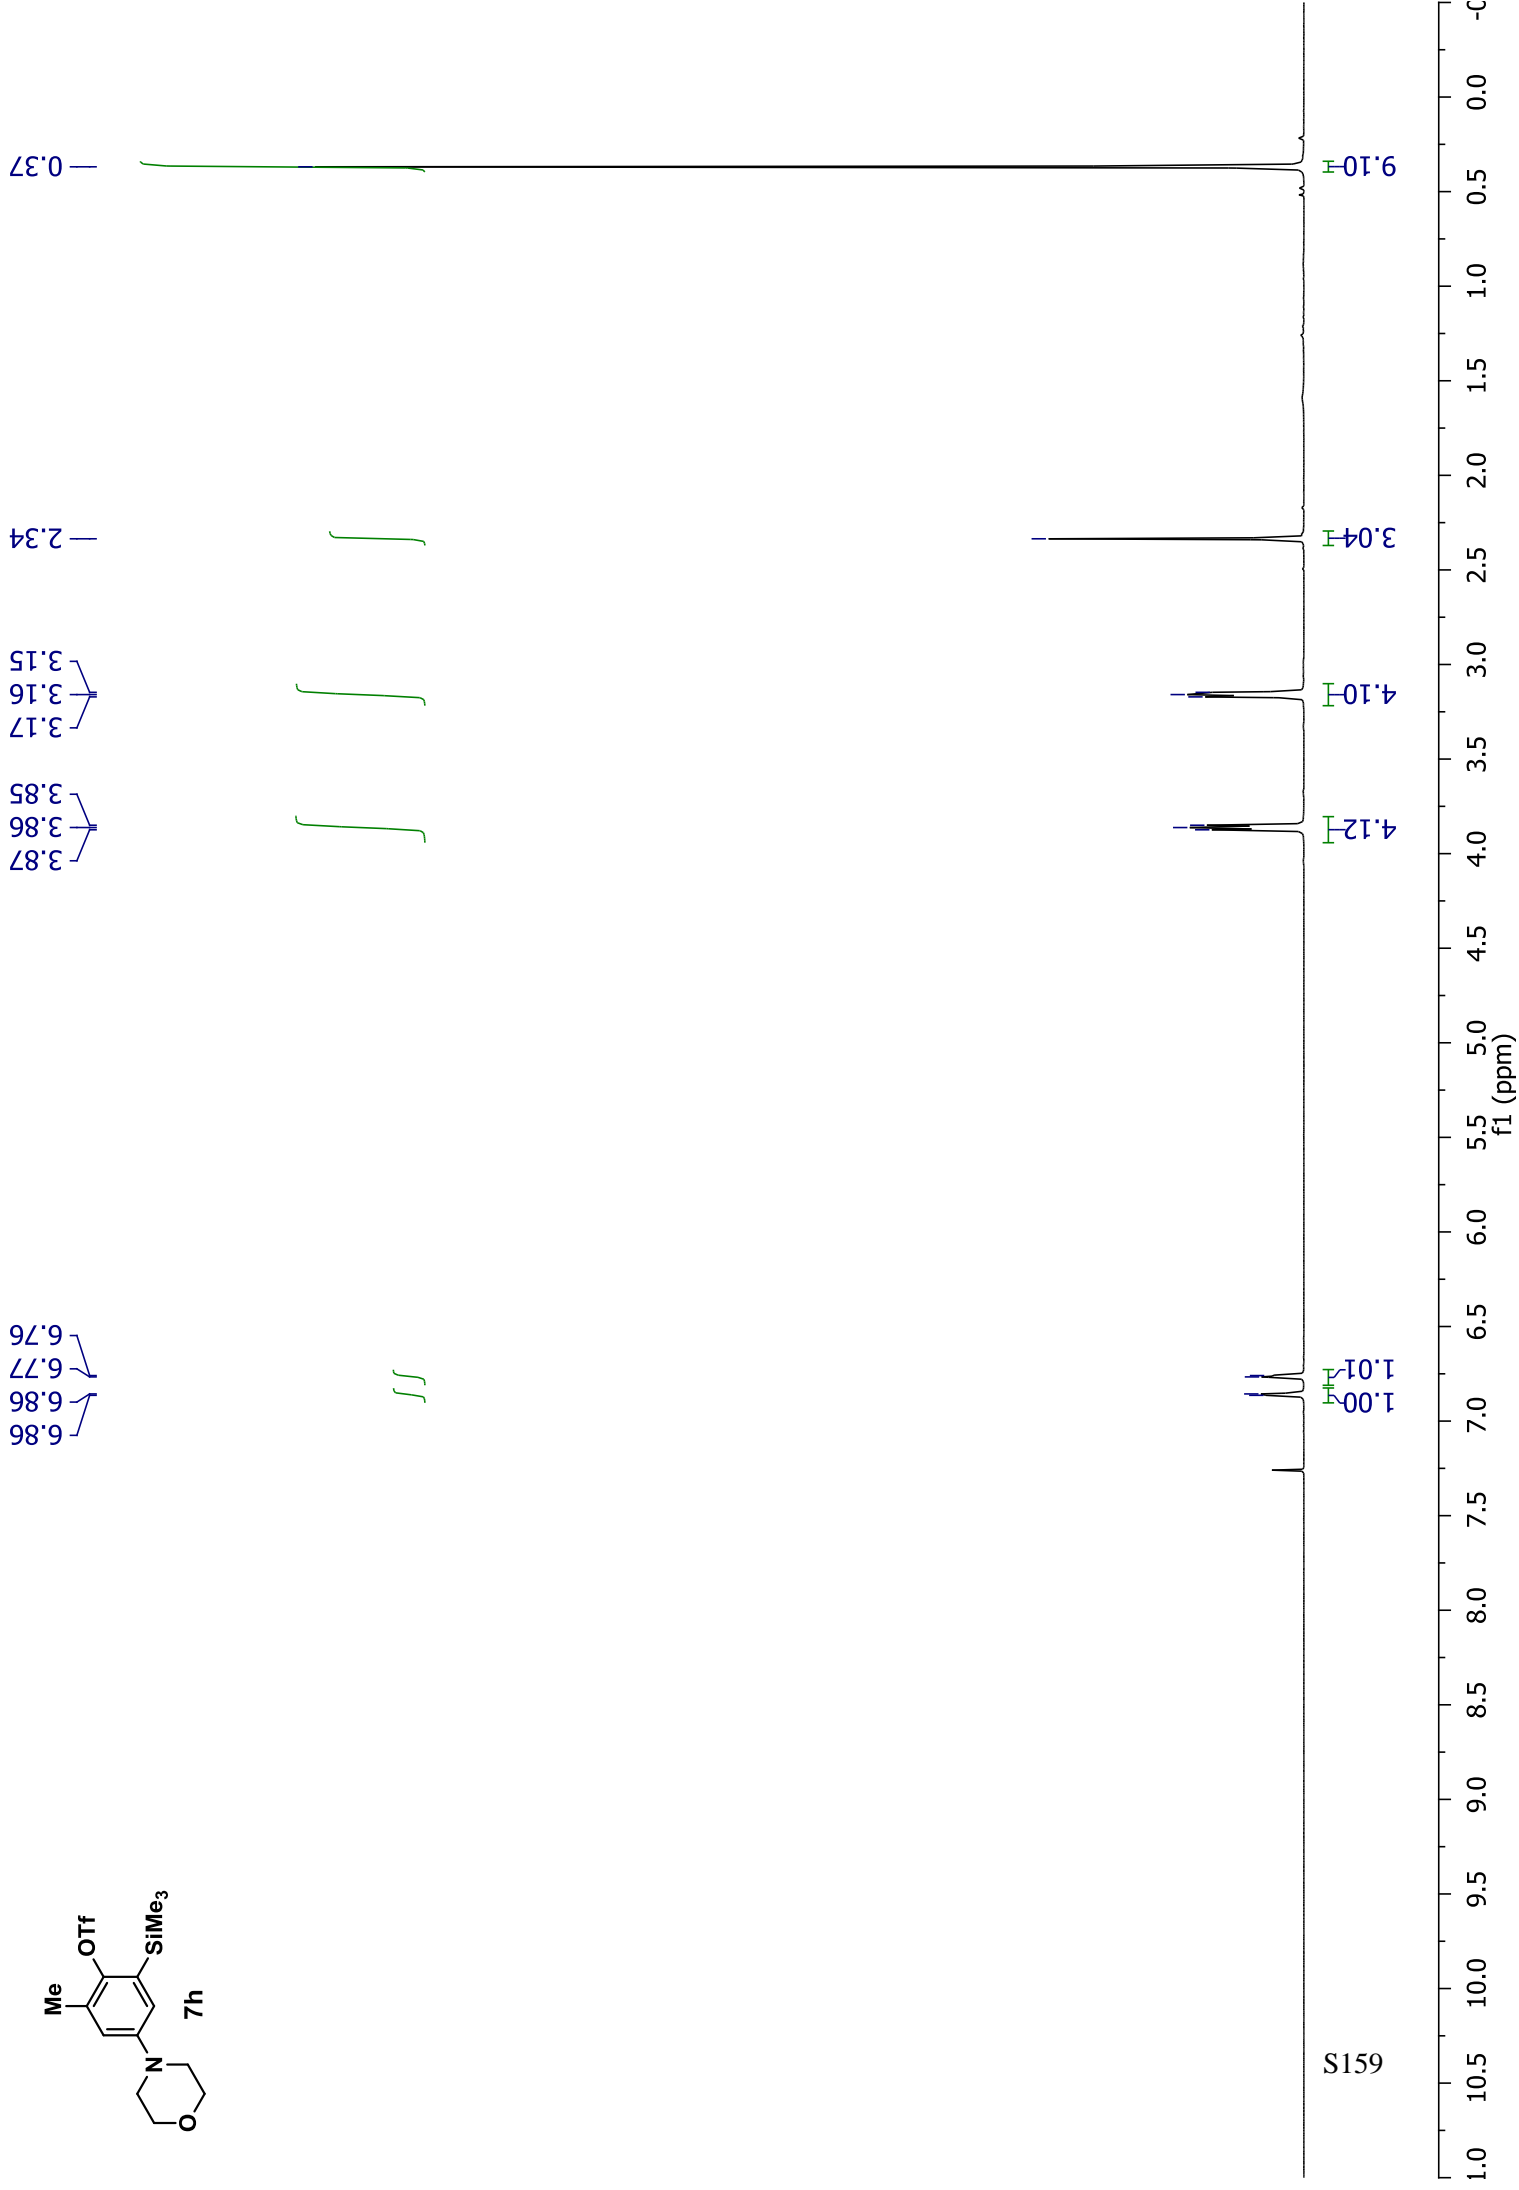



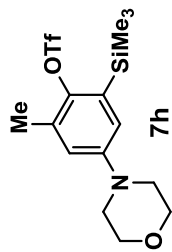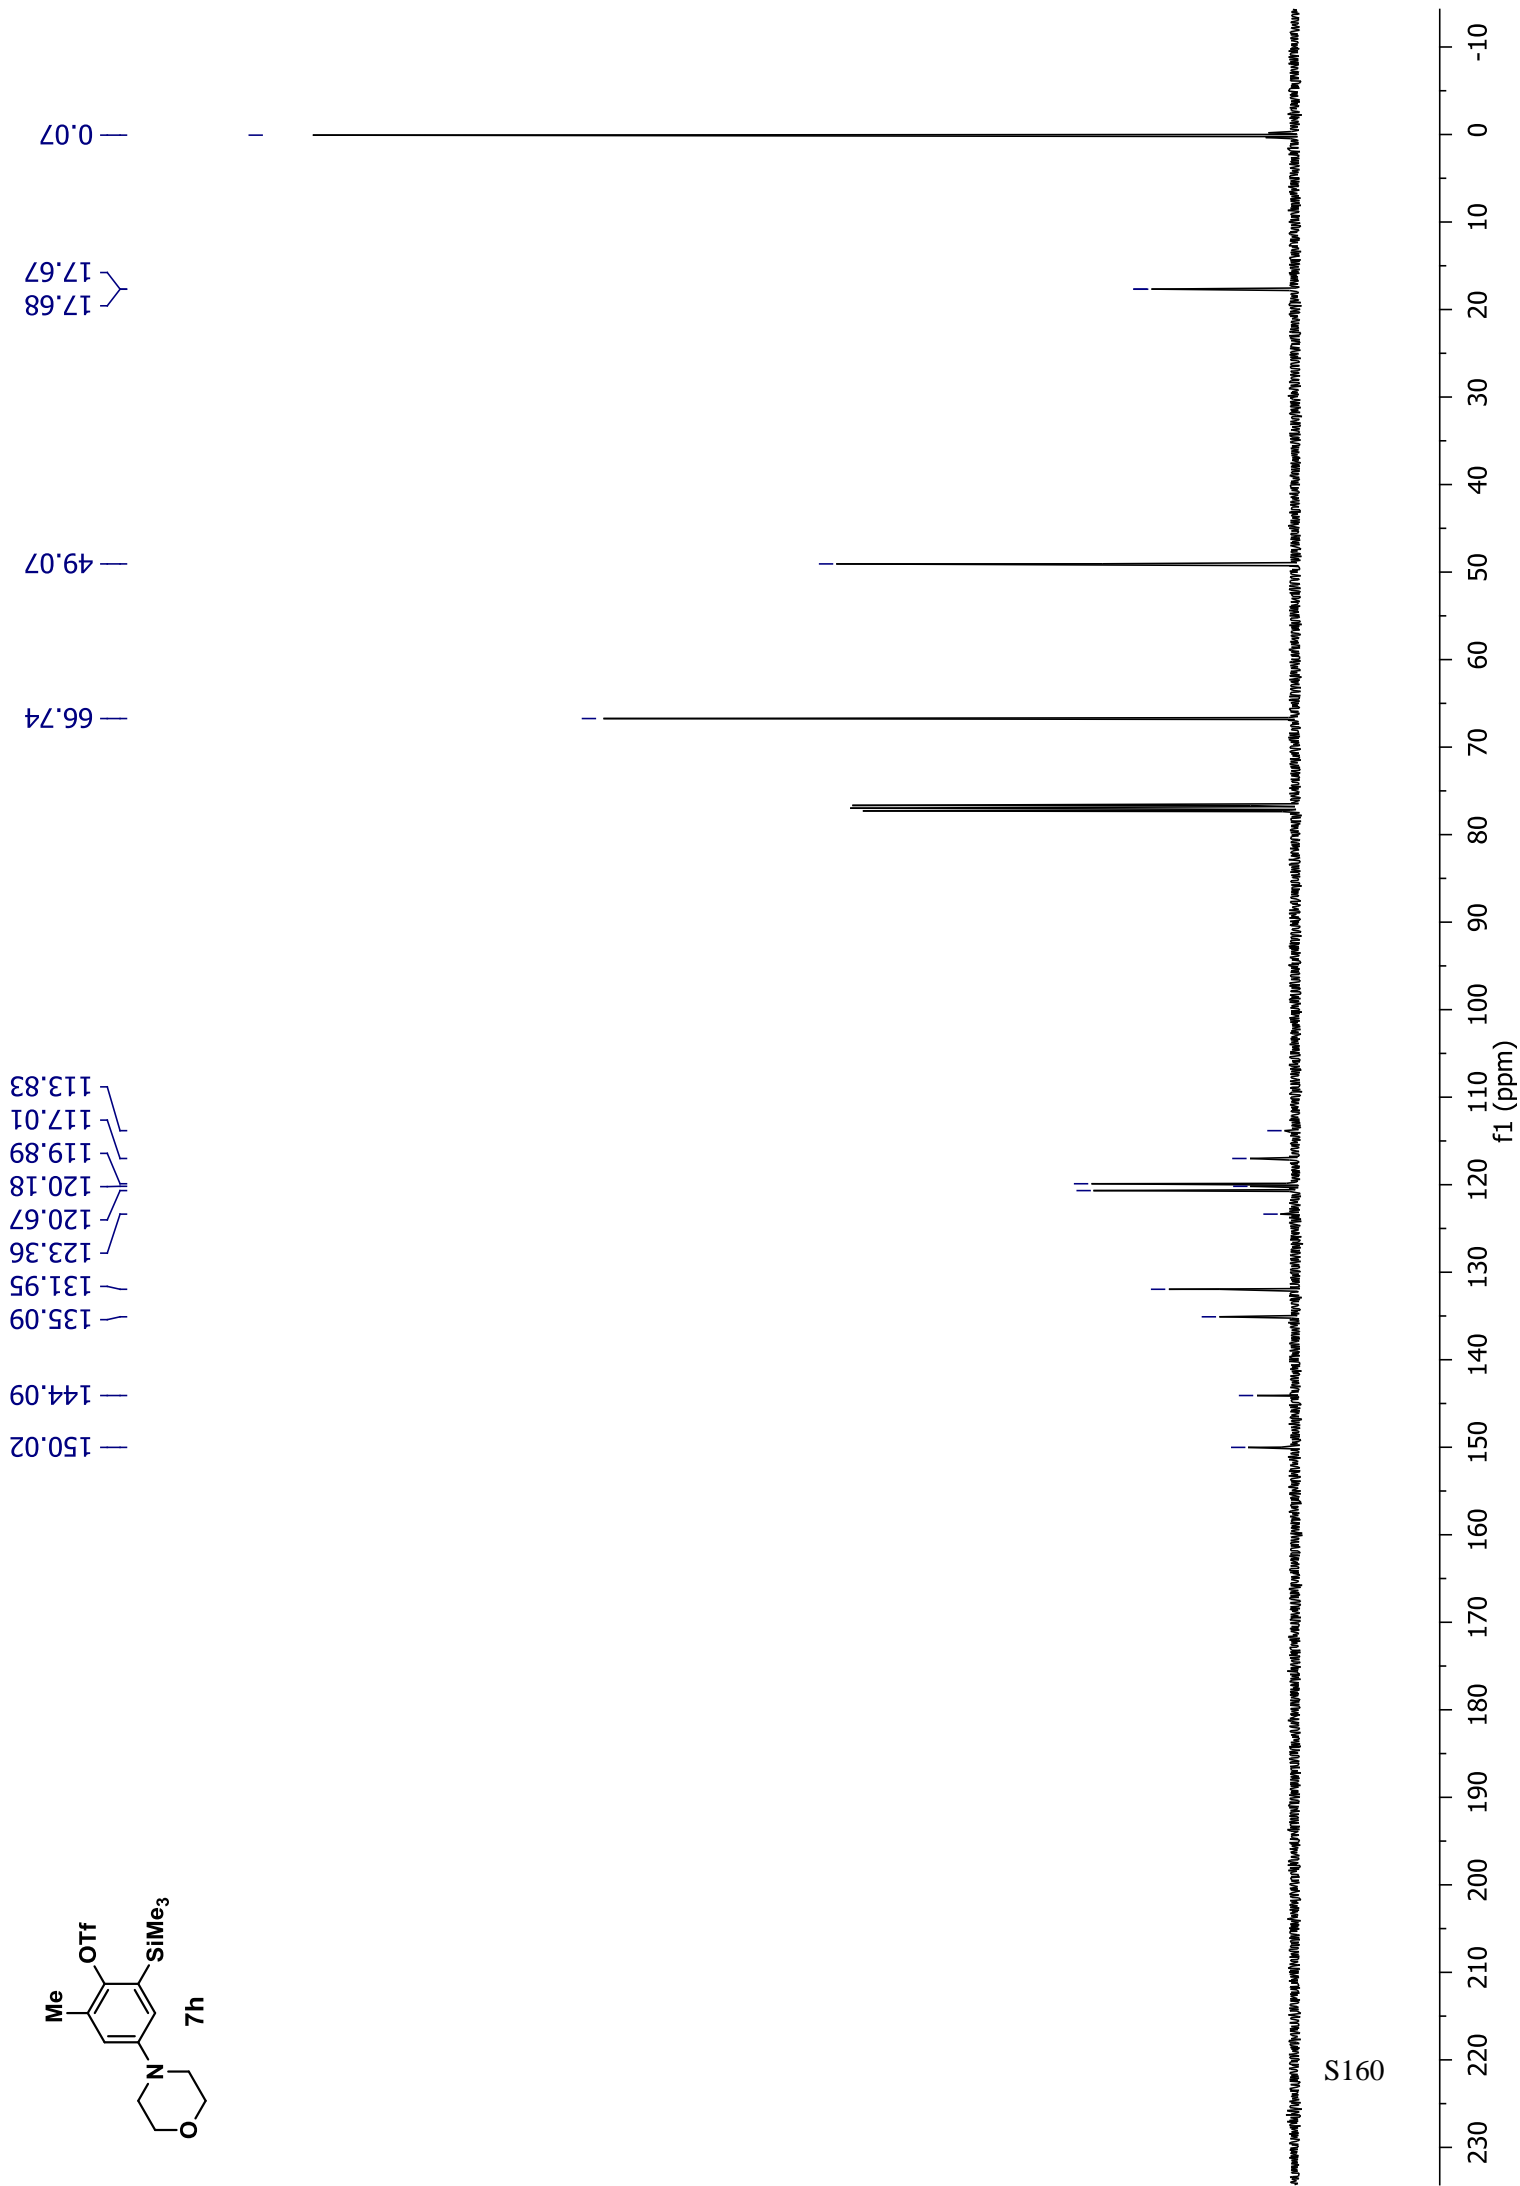



-73.52

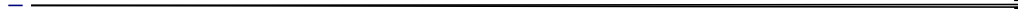

S161

30 20 10 0 -10 -20 -30 -40 -50 -60 -70 -80 -90 -100 -110 -120 -130 -140 -150 -160 -170 -180 -190 -200

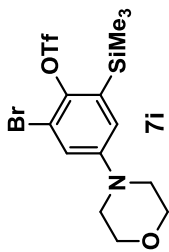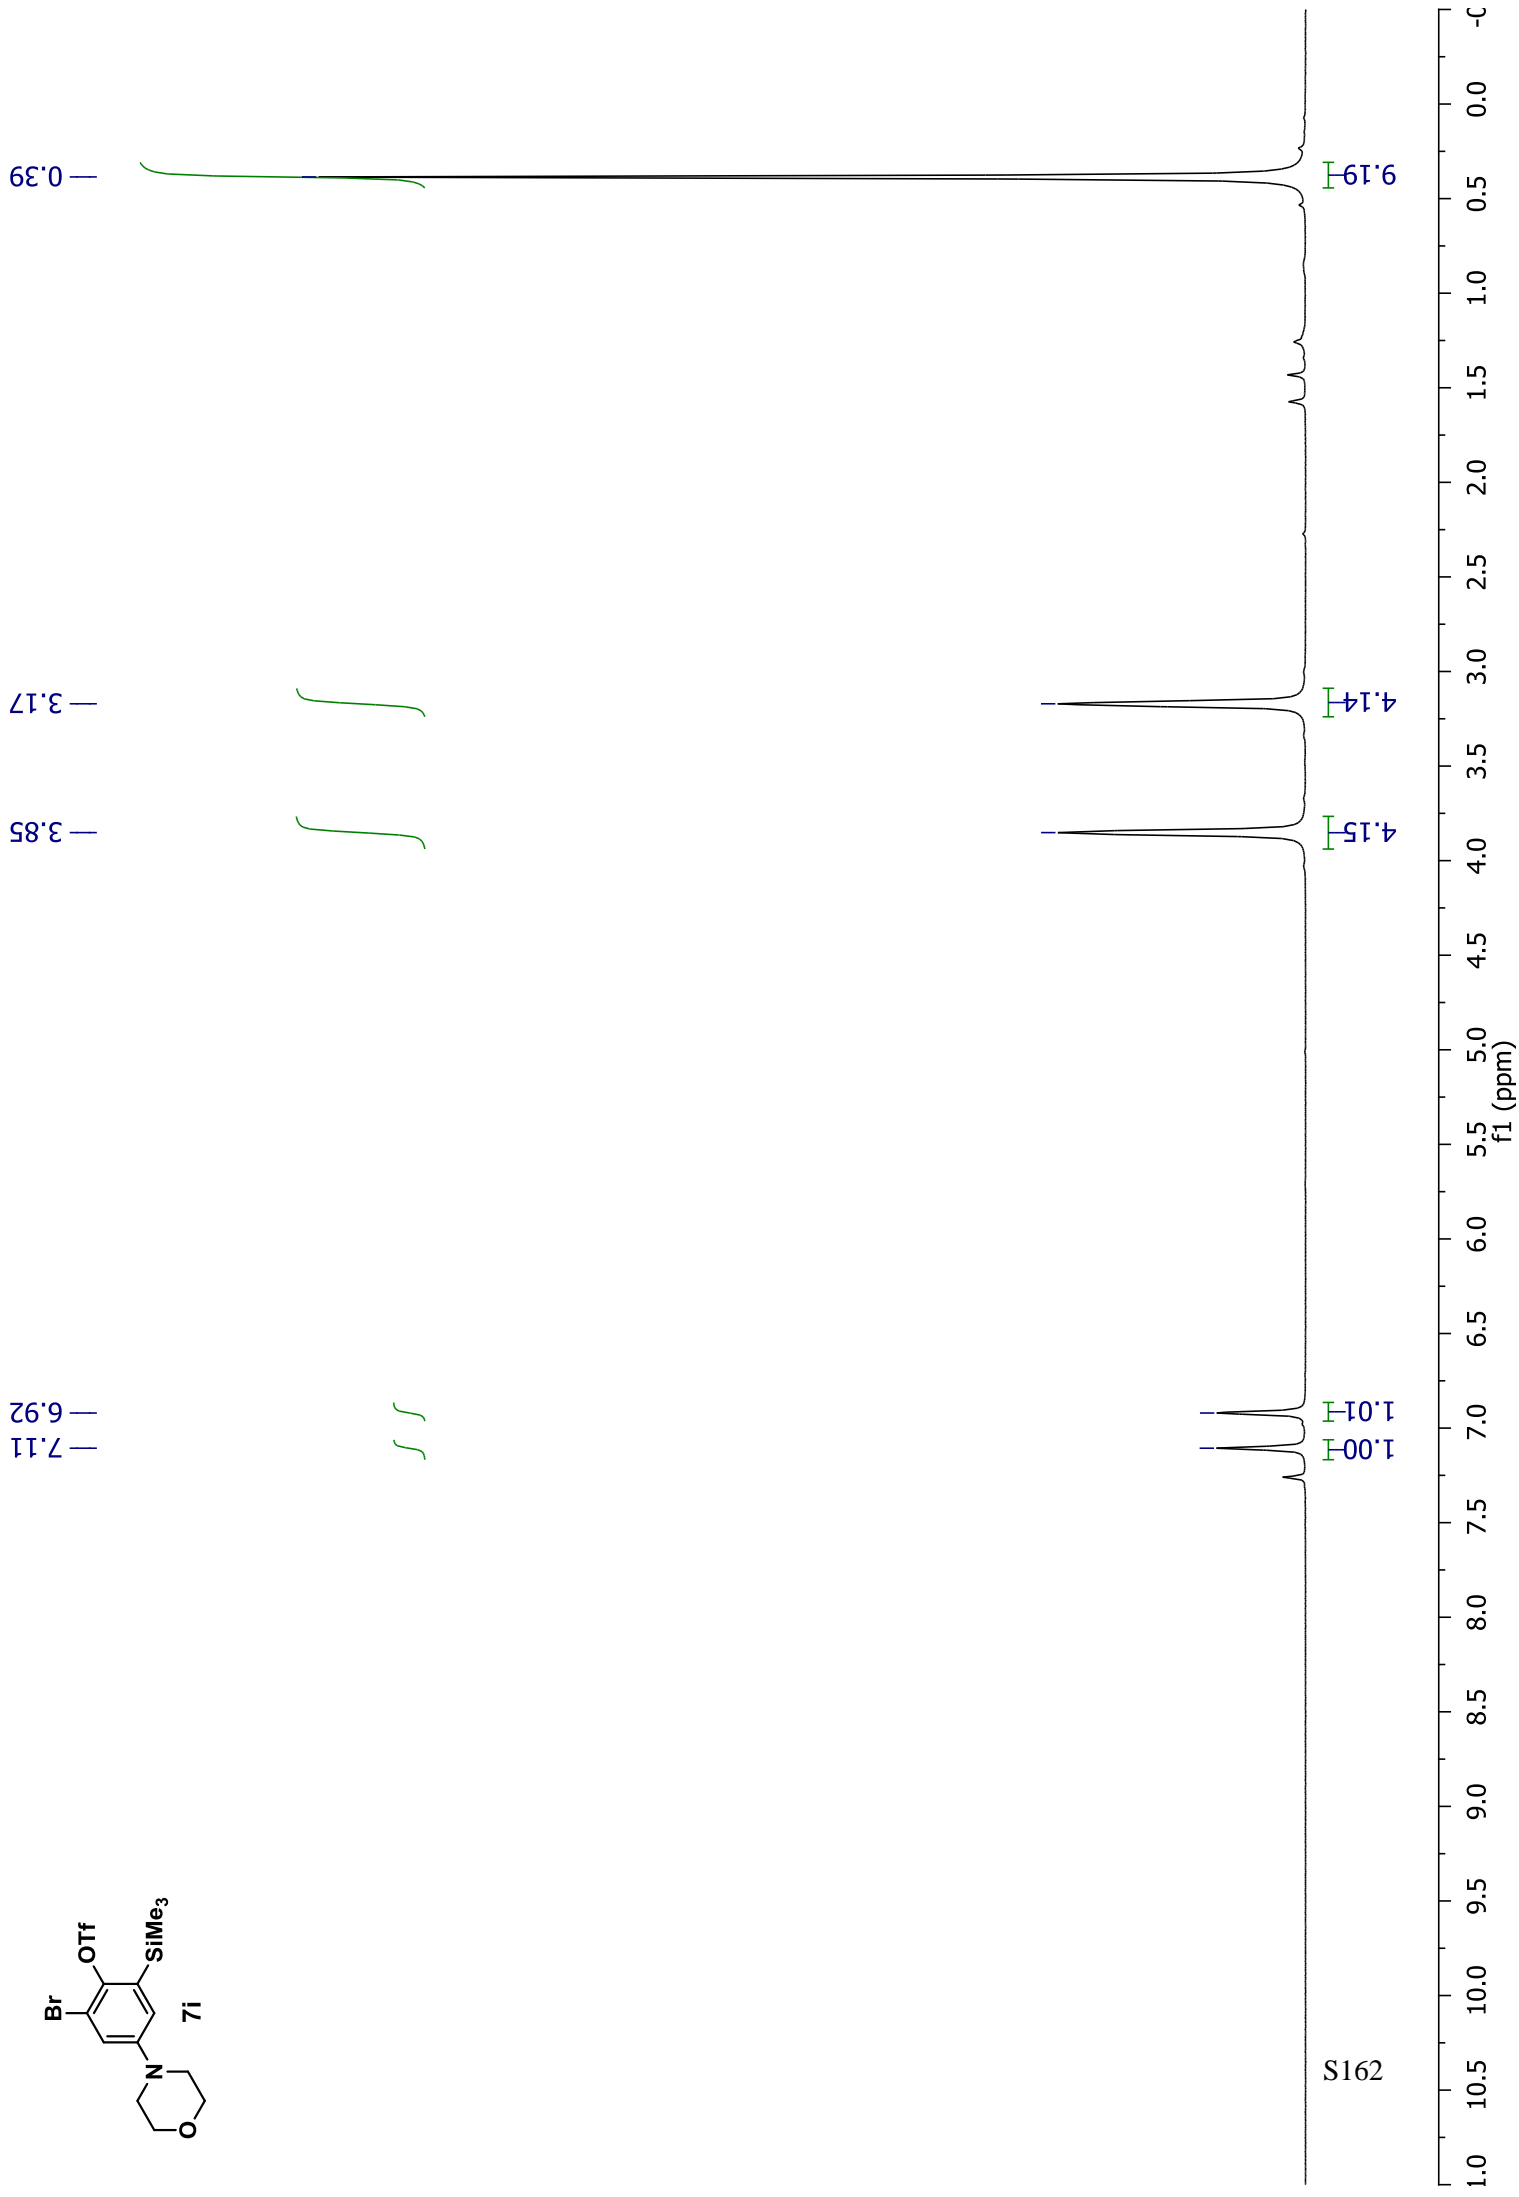

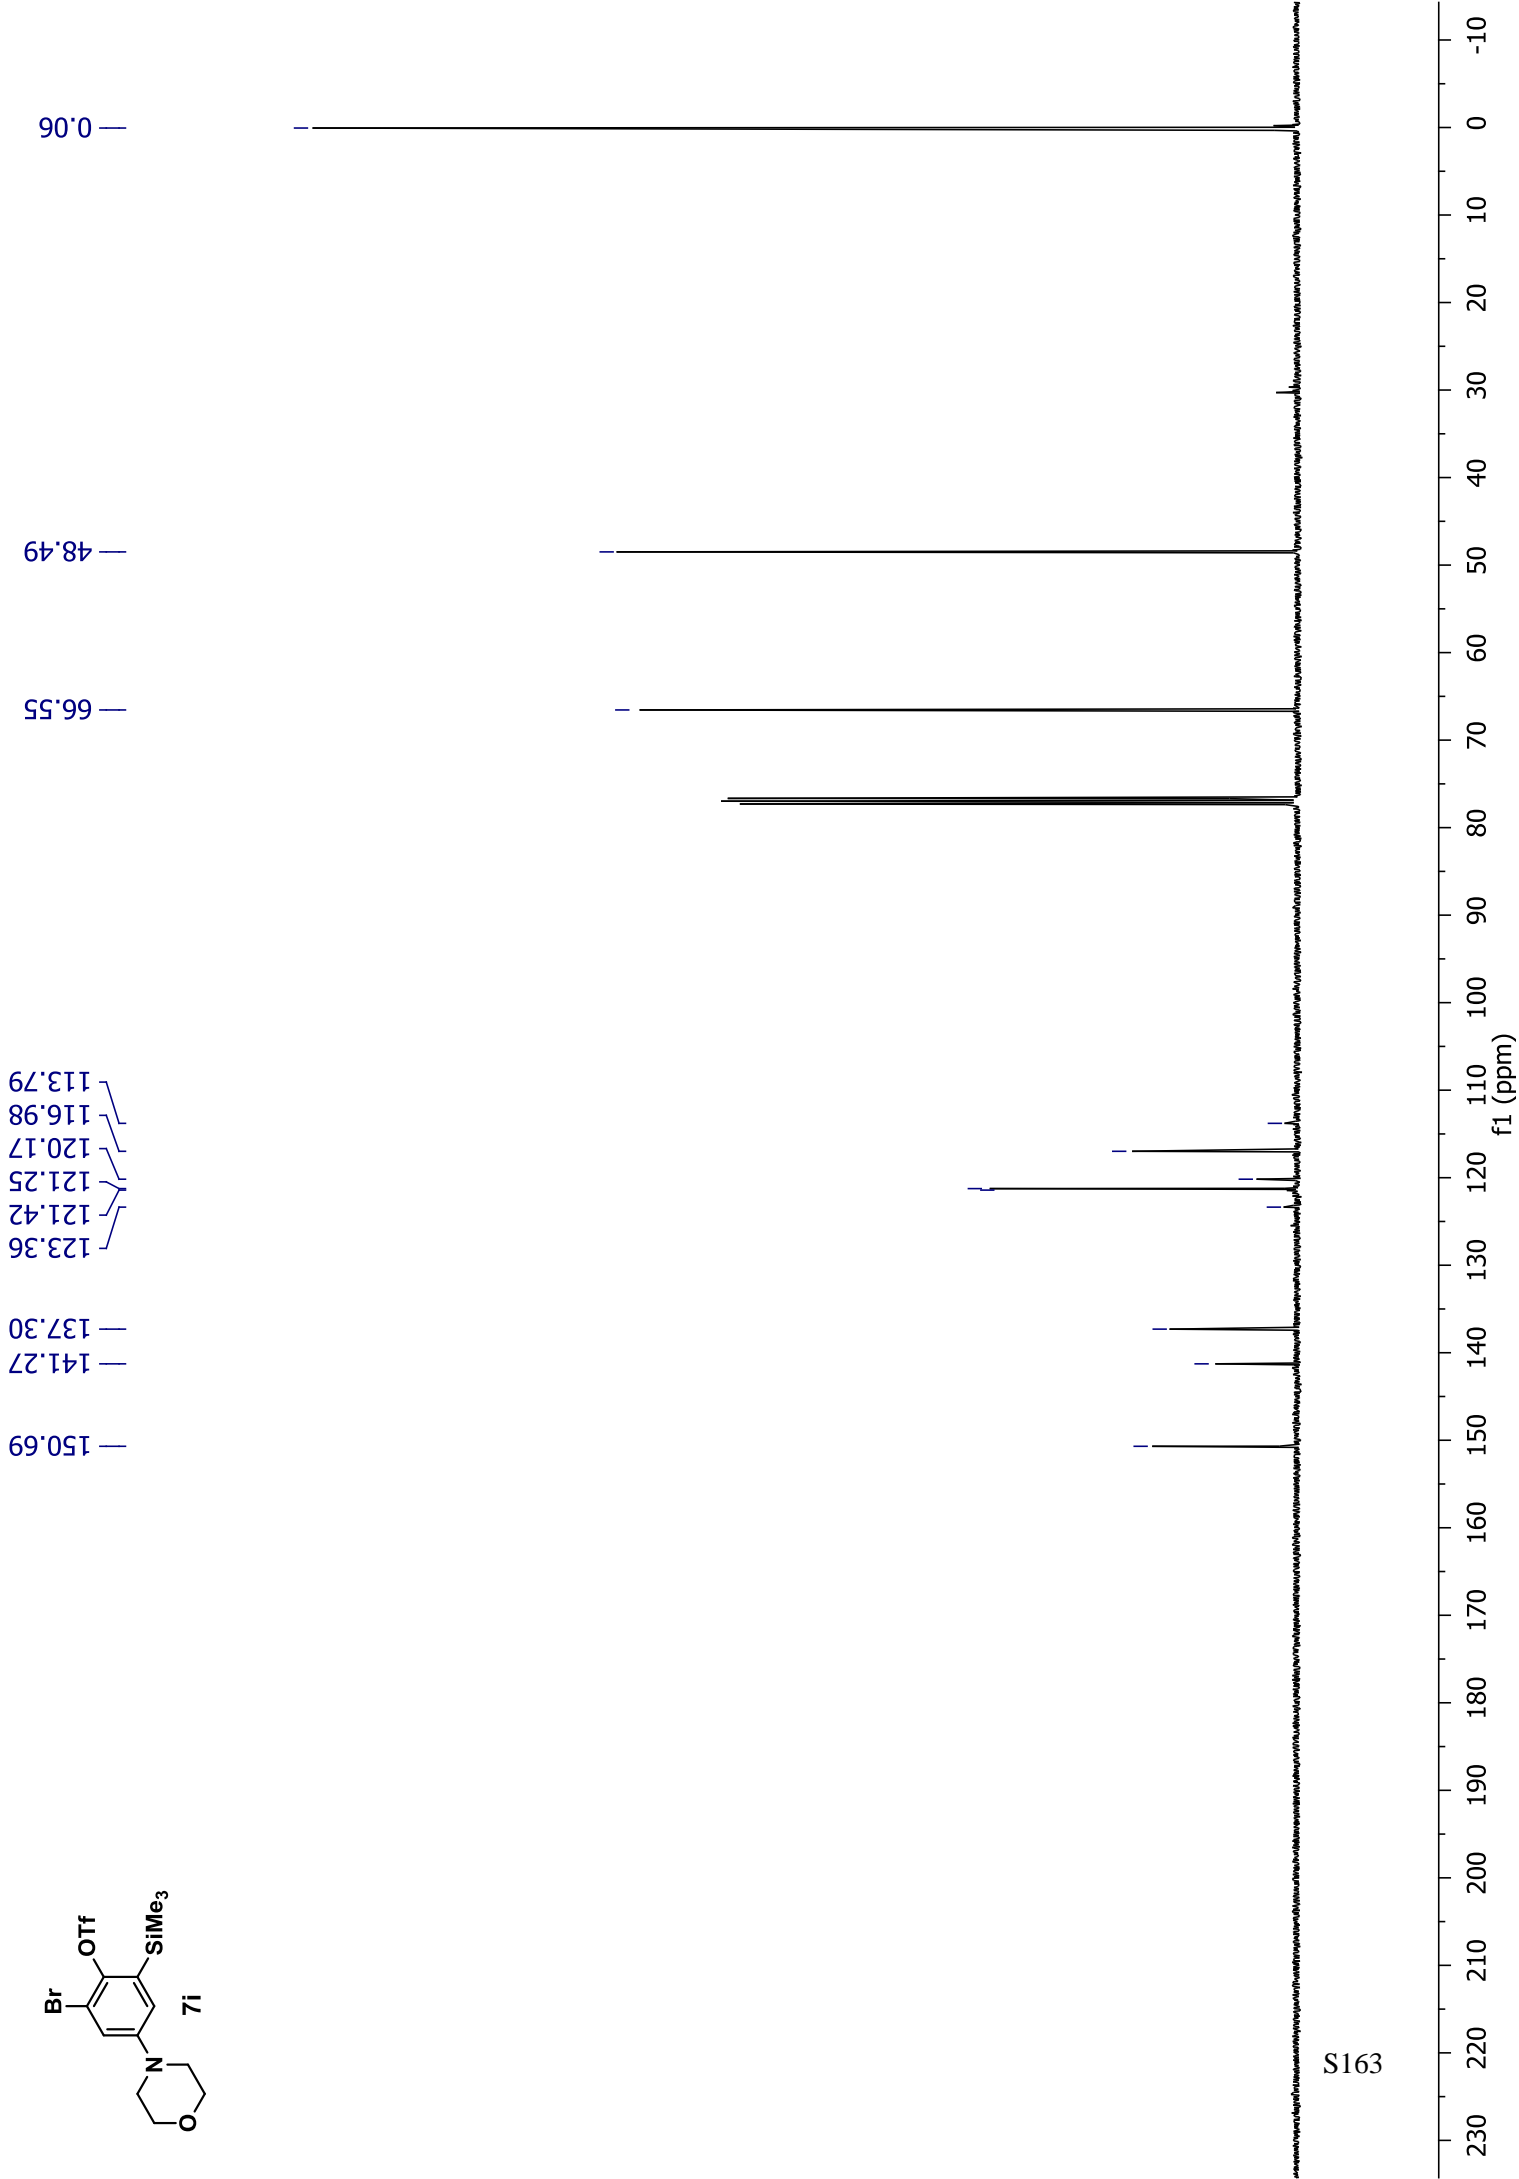

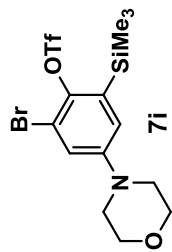

-71.81

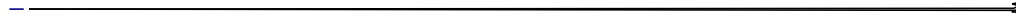

S164



Supplement: anie0054-11765-sd1.pdf [file anie0054-11765-sd1.pdf]
